# Supplementary material for: Hippocampal transcriptome profiling reveals common disease pathways in chronic hypoperfusion and aging
Source: Aging (Albany NY). 2021 Jun 1;13(11):14651–74. doi: 10.18632/aging.203123 (PMC8221317; doi:10.18632/aging.203123)
Supplement: Supplementary Table 3A [file aging-13-203123-s004.xlsx]

## Sheet: Upregulated DEGs
Supplementary Table 3A. List of all differentially expressed (upregulated and downregulated) genes in mice subjected to 7 and 30 days of BCAS.
Gene Name	Gene ID	log2 (Fold Change)	q-value
Gm15767	ENSMUSG00000086021	0.00015669	NA
Ackr4	ENSMUSG00000079355	0.000246	0.99925
Gpx2	ENSMUSG00000042808	0.00025447	NA
4932435O22Rik	ENSMUSG00000062391	0.00028102	NA
Rab44	ENSMUSG00000064147	0.00029013	NA
Ripply3	ENSMUSG00000022941	0.00032189	NA
5830432E09Rik	ENSMUSG00000097471	0.00032943	NA
AW495222	ENSMUSG00000087334	0.00044843	0.99864
Slc32a1	ENSMUSG00000037771	0.00045364	0.99813
Pbdc1	ENSMUSG00000031226	0.00046585	0.99811
Arfgap3	ENSMUSG00000054277	0.00047708	0.99772
Ubfd1	ENSMUSG00000030870	0.00048346	0.99647
Ripk2	ENSMUSG00000041135	0.00049405	0.99808
Gm11978	ENSMUSG00000086373	0.00057098	NA
Cep131	ENSMUSG00000039781	0.00061699	0.99722
Gcnt1	ENSMUSG00000038843	0.00062479	0.9982
Gm13991	ENSMUSG00000081787	0.000652	0.9982
Catsper2	ENSMUSG00000033486	0.00067588	0.99788
Traf3ip2	ENSMUSG00000019842	0.00071397	0.99782
Gm15551	ENSMUSG00000086679	0.00075195	NA
Hcar1	ENSMUSG00000049241	0.00076333	0.99811
Gm16759	ENSMUSG00000086539	0.00077645	NA
Gm8038	ENSMUSG00000091981	0.00078353	NA
Crtc1	ENSMUSG00000003575	0.00080318	0.99703
Abcf2	ENSMUSG00000028953	0.00082848	0.9956
Atpaf2	ENSMUSG00000042709	0.00090418	0.99568
Wipi1	ENSMUSG00000041895	0.00095012	0.99659
Dtwd1	ENSMUSG00000023330	0.00097588	0.99585
Kctd9	ENSMUSG00000034327	0.00098974	0.99644
Zfp655	ENSMUSG00000007812	0.00099358	0.99647
Gm20667	ENSMUSG00000093726	0.0010005	NA
Slc7a11	ENSMUSG00000027737	0.0010012	0.99703
Gm13939	ENSMUSG00000063751	0.0010177	NA
Dpf2	ENSMUSG00000024826	0.0010234	0.99387
Rnf113a1	ENSMUSG00000036537	0.0010448	0.99676
Mafg	ENSMUSG00000051510	0.0010636	0.99503
Gm12925	ENSMUSG00000087307	0.0010807	NA
Aspdh	ENSMUSG00000038704	0.0010839	0.99741
9130401M01Rik	ENSMUSG00000101892	0.0010846	0.99703
D11Wsu47e	ENSMUSG00000041623	0.0012166	0.99588
4932443L11Rik	ENSMUSG00000086805	0.0012344	NA
Tmem106a	ENSMUSG00000034947	0.001239	0.99703
Dnajc11	ENSMUSG00000039768	0.0012612	0.99389
Flywch1	ENSMUSG00000040097	0.0012644	0.99588
Sun1	ENSMUSG00000036817	0.0013302	0.99623
Mdm2	ENSMUSG00000020184	0.0013775	0.99283
Gm26592	ENSMUSG00000097535	0.0013956	0.99699
Plekhm1	ENSMUSG00000034247	0.0014131	0.99402
Gm17907	ENSMUSG00000092526	0.0014942	NA
Pex26	ENSMUSG00000067825	0.001577	0.99546
Fam216a	ENSMUSG00000029463	0.0015885	0.99287
Arhgap10	ENSMUSG00000037148	0.0015932	0.99569
Ppm1f	ENSMUSG00000026181	0.0015968	0.99287
Zic4	ENSMUSG00000036972	0.0016303	0.99626
Myh3	ENSMUSG00000020908	0.0016945	0.9956
Bhmt2	ENSMUSG00000042118	0.0017459	NA
Gm6728	ENSMUSG00000091408	0.0017518	NA
Gm12630	ENSMUSG00000082969	0.0017684	NA
Spryd7	ENSMUSG00000021930	0.0017898	0.99256
Gm6166	ENSMUSG00000074280	0.0018134	0.99634
Noa1	ENSMUSG00000036285	0.0018183	0.99372
Cidea	ENSMUSG00000024526	0.0018908	0.995
Sfr1	ENSMUSG00000025066	0.0018986	0.98591
Dram2	ENSMUSG00000027900	0.0019288	0.99229
Gm3411	ENSMUSG00000079396	0.0019826	NA
Nck2	ENSMUSG00000066877	0.0020619	0.99023
Dok1	ENSMUSG00000068335	0.0020954	0.99459
Vhl	ENSMUSG00000033933	0.0020967	0.99021
Dbhos	ENSMUSG00000085008	0.0020992	NA
Gm5432	ENSMUSG00000097580	0.002127	NA
Armcx1	ENSMUSG00000033460	0.0021534	0.98975
Eif2ak2	ENSMUSG00000024079	0.002213	0.99482
Kcnab2	ENSMUSG00000028931	0.0022421	0.9928
Mrps27	ENSMUSG00000041632	0.0023208	0.99402
Entpd6	ENSMUSG00000033068	0.0023256	0.99189
Rhcg	ENSMUSG00000030549	0.0023672	0.99557
Klf3	ENSMUSG00000029178	0.0023936	0.99277
Zwilch	ENSMUSG00000032400	0.0024171	0.99459
Atxn7l3	ENSMUSG00000059995	0.0024177	0.98861
Pgm1	ENSMUSG00000029171	0.0024234	0.99042
Gm12708	ENSMUSG00000084918	0.0024251	NA
Rab35	ENSMUSG00000029518	0.0024361	0.98961
Agbl5	ENSMUSG00000029165	0.0024394	0.99059
Plec	ENSMUSG00000022565	0.0024691	0.99023
Urgcp	ENSMUSG00000049680	0.0024906	0.988
Fras1	ENSMUSG00000034687	0.0025039	0.99459
Nfkb1	ENSMUSG00000028163	0.0025252	0.99143
9130230N09Rik	ENSMUSG00000092626	0.0025468	NA
Capn6	ENSMUSG00000067276	0.0026186	0.995
Nudcd3	ENSMUSG00000053838	0.0026273	0.98274
Arhgap36	ENSMUSG00000036198	0.0026501	0.99479
Abcb1b	ENSMUSG00000028970	0.0027079	0.99283
Arhgef4	ENSMUSG00000037509	0.0027235	0.99059
Nova1	ENSMUSG00000021047	0.0027348	0.98979
Wbp11	ENSMUSG00000030216	0.0027654	0.98745
Tdrd1	ENSMUSG00000025081	0.0028047	0.99478
Cbln3	ENSMUSG00000040380	0.0029574	0.99459
Ensa	ENSMUSG00000038619	0.0029629	0.98309
1700010K24Rik	ENSMUSG00000085102	0.00305	NA
Cage1	ENSMUSG00000044566	0.0030565	0.99229
Lctl	ENSMUSG00000032401	0.0031201	NA
Nt5c2	ENSMUSG00000025041	0.0032059	0.98009
Mip	ENSMUSG00000025389	0.0033059	NA
0610009O20Rik	ENSMUSG00000024442	0.0033189	0.98738
Bend5	ENSMUSG00000028545	0.0034375	0.98471
Rbm15b	ENSMUSG00000074102	0.003462	0.98591
Hmbox1	ENSMUSG00000021972	0.0035227	0.98554
Lrig2	ENSMUSG00000032913	0.0035267	0.98051
Twist1	ENSMUSG00000035799	0.003562	0.99021
Gm5455	ENSMUSG00000045609	0.0035665	NA
Msl3l2	ENSMUSG00000047669	0.0035691	0.98591
Txndc12	ENSMUSG00000028567	0.0035776	0.98661
Kpna2	ENSMUSG00000018362	0.0036069	0.98523
Bai1	ENSMUSG00000034730	0.0036466	0.98975
Adpgk	ENSMUSG00000025236	0.003658	0.98311
Tsen15	ENSMUSG00000014980	0.0036906	0.98523
Wap	ENSMUSG00000000381	0.0036918	NA
Klk4	ENSMUSG00000006948	0.0036918	NA
Mcoln2	ENSMUSG00000011008	0.0036918	NA
Blk	ENSMUSG00000014453	0.0036918	NA
Dcdc2c	ENSMUSG00000020633	0.0036918	NA
Gcm2	ENSMUSG00000021362	0.0036918	NA
Slc6a18	ENSMUSG00000021612	0.0036918	NA
4933425L06Rik	ENSMUSG00000021718	0.0036918	NA
4930564B18Rik	ENSMUSG00000022002	0.0036918	NA
Kcnk16	ENSMUSG00000023387	0.0036918	NA
Calcr	ENSMUSG00000023964	0.0036918	NA
Armc12	ENSMUSG00000024223	0.0036918	NA
Clps	ENSMUSG00000024225	0.0036918	NA
Abcg8	ENSMUSG00000024254	0.0036918	NA
Fam89b	ENSMUSG00000024939	0.0036918	NA
Agxt	ENSMUSG00000026272	0.0036918	NA
Fam209	ENSMUSG00000027505	0.0036918	NA
Fabp12	ENSMUSG00000027530	0.0036918	NA
Adad1	ENSMUSG00000027719	0.0036918	NA
Hsd3b6	ENSMUSG00000027869	0.0036918	NA
Lce1g	ENSMUSG00000027919	0.0036918	NA
Hemgn	ENSMUSG00000028332	0.0036918	NA
Hes2	ENSMUSG00000028940	0.0036918	NA
4930548H24Rik	ENSMUSG00000029138	0.0036918	NA
Sult1d1	ENSMUSG00000029273	0.0036918	NA
1700123K08Rik	ENSMUSG00000029526	0.0036918	NA
Cd69	ENSMUSG00000030156	0.0036918	NA
Gata1	ENSMUSG00000031162	0.0036918	NA
Klkb1	ENSMUSG00000031640	0.0036918	NA
Ucp1	ENSMUSG00000031710	0.0036918	NA
Hsd17b3	ENSMUSG00000033122	0.0036918	NA
Fndc3c1	ENSMUSG00000033737	0.0036918	NA
Scn10a	ENSMUSG00000034533	0.0036918	NA
Ssx9	ENSMUSG00000035371	0.0036918	NA
Meox2	ENSMUSG00000036144	0.0036918	NA
Rbm42	ENSMUSG00000036733	0.0036918	NA
2210407C18Rik	ENSMUSG00000037145	0.0036918	NA
1700017G19Rik	ENSMUSG00000037884	0.0036918	NA
Foxa3	ENSMUSG00000040891	0.0036918	NA
Ccr6	ENSMUSG00000040899	0.0036918	NA
Apol7c	ENSMUSG00000044309	0.0036918	NA
Lkaaear1	ENSMUSG00000045794	0.0036918	NA
1700018M17Rik	ENSMUSG00000046145	0.0036918	NA
Defb14	ENSMUSG00000046354	0.0036918	NA
Skint10	ENSMUSG00000048766	0.0036918	NA
Gm12497	ENSMUSG00000049231	0.0036918	NA
Prss38	ENSMUSG00000049291	0.0036918	NA
Prdx6b	ENSMUSG00000050114	0.0036918	NA
Mmp13	ENSMUSG00000050578	0.0036918	NA
Prss27	ENSMUSG00000050762	0.0036918	NA
Gm11437	ENSMUSG00000051452	0.0036918	NA
Rnf133	ENSMUSG00000051956	0.0036918	NA
A530006G24Rik	ENSMUSG00000051986	0.0036918	NA
Olfr901	ENSMUSG00000052058	0.0036918	NA
Gm650	ENSMUSG00000052157	0.0036918	NA
Kat2b-ps	ENSMUSG00000053208	0.0036918	NA
Trim50	ENSMUSG00000053388	0.0036918	NA
A730061H03Rik	ENSMUSG00000053588	0.0036918	NA
Slc51b	ENSMUSG00000053862	0.0036918	NA
A730045E13Rik	ENSMUSG00000053979	0.0036918	NA
Gm9956	ENSMUSG00000054758	0.0036918	NA
Ifng	ENSMUSG00000055170	0.0036918	NA
Slc6a2	ENSMUSG00000055368	0.0036918	NA
Rnf212	ENSMUSG00000055385	0.0036918	NA
Gm5447	ENSMUSG00000056257	0.0036918	NA
Vmn1r53	ENSMUSG00000057697	0.0036918	NA
Gm7452	ENSMUSG00000058661	0.0036918	NA
Zfp708	ENSMUSG00000058883	0.0036918	NA
Gm10052	ENSMUSG00000058922	0.0036918	NA
Ube2nl	ENSMUSG00000059585	0.0036918	NA
Stfa2l1	ENSMUSG00000059657	0.0036918	NA
Rpl21-ps3	ENSMUSG00000060566	0.0036918	NA
Orm2	ENSMUSG00000061540	0.0036918	NA
Olfr99	ENSMUSG00000061972	0.0036918	NA
Gm19518	ENSMUSG00000062036	0.0036918	NA
Serpina11	ENSMUSG00000063232	0.0036918	NA
BC048507	ENSMUSG00000064063	0.0036918	NA
Gm10220	ENSMUSG00000067698	0.0036918	NA
Gm14243	ENSMUSG00000067745	0.0036918	NA
Actc1	ENSMUSG00000068614	0.0036918	NA
Usp9y	ENSMUSG00000069044	0.0036918	NA
Gm20634	ENSMUSG00000070392	0.0036918	NA
Gm13015	ENSMUSG00000070834	0.0036918	NA
Timm8a2	ENSMUSG00000071229	0.0036918	NA
Vrtn	ENSMUSG00000071235	0.0036918	NA
1810009A15Rik	ENSMUSG00000071653	0.0036918	NA
Gm17184	ENSMUSG00000072574	0.0036918	NA
Gpr174	ENSMUSG00000073008	0.0036918	NA
Gm10540	ENSMUSG00000073569	0.0036918	NA
Foxr1	ENSMUSG00000074397	0.0036918	NA
Gm10729	ENSMUSG00000074603	0.0036918	NA
4933403O03Rik	ENSMUSG00000075046	0.0036918	NA
Gm10837	ENSMUSG00000075465	0.0036918	NA
Gm17205	ENSMUSG00000075469	0.0036918	NA
Igkv8-27	ENSMUSG00000076580	0.0036918	NA
Ighj4	ENSMUSG00000076618	0.0036918	NA
Gm10913	ENSMUSG00000078097	0.0036918	NA
Rnf148	ENSMUSG00000078179	0.0036918	NA
Gm5150	ENSMUSG00000078780	0.0036918	NA
Gm15737	ENSMUSG00000079462	0.0036918	NA
Gm14862	ENSMUSG00000079694	0.0036918	NA
Klra4	ENSMUSG00000079852	0.0036918	NA
Gm15617	ENSMUSG00000080736	0.0036918	NA
Gm16061	ENSMUSG00000080972	0.0036918	NA
Gm12804	ENSMUSG00000081068	0.0036918	NA
Gm12565	ENSMUSG00000081093	0.0036918	NA
Gm5270	ENSMUSG00000081099	0.0036918	NA
Gm5940	ENSMUSG00000081205	0.0036918	NA
Gm15719	ENSMUSG00000081242	0.0036918	NA
Gm12599	ENSMUSG00000081325	0.0036918	NA
Gm16071	ENSMUSG00000081343	0.0036918	NA
Gm16171	ENSMUSG00000081372	0.0036918	NA
Gm12734	ENSMUSG00000081451	0.0036918	NA
Gm12508	ENSMUSG00000081504	0.0036918	NA
Gm16200	ENSMUSG00000081520	0.0036918	NA
Gm15544	ENSMUSG00000081664	0.0036918	NA
Gm12712	ENSMUSG00000081675	0.0036918	NA
Gm11460	ENSMUSG00000081758	0.0036918	NA
Gm12713	ENSMUSG00000081811	0.0036918	NA
Gm12390	ENSMUSG00000082008	0.0036918	NA
Gm12848	ENSMUSG00000082043	0.0036918	NA
Gm12098	ENSMUSG00000082078	0.0036918	NA
Gm13777	ENSMUSG00000082108	0.0036918	NA
Gm11212	ENSMUSG00000082141	0.0036918	NA
Gm13326	ENSMUSG00000082235	0.0036918	NA
Gm8401	ENSMUSG00000082336	0.0036918	NA
Gm12363	ENSMUSG00000082367	0.0036918	NA
Mkrn1-ps1	ENSMUSG00000082389	0.0036918	NA
Gm11502	ENSMUSG00000082453	0.0036918	NA
Gm6272	ENSMUSG00000082524	0.0036918	NA
Gm8200	ENSMUSG00000082527	0.0036918	NA
Gm11470	ENSMUSG00000082665	0.0036918	NA
Gm13258	ENSMUSG00000082668	0.0036918	NA
Gm13162	ENSMUSG00000082779	0.0036918	NA
Gm12994	ENSMUSG00000082841	0.0036918	NA
Gm13537	ENSMUSG00000082844	0.0036918	NA
Gm5073	ENSMUSG00000083140	0.0036918	NA
Gm14405	ENSMUSG00000083170	0.0036918	NA
D11Bhm181e	ENSMUSG00000083176	0.0036918	NA
Gm11511	ENSMUSG00000083268	0.0036918	NA
Gm12656	ENSMUSG00000083359	0.0036918	NA
Gm13487	ENSMUSG00000083449	0.0036918	NA
Gm13491	ENSMUSG00000083472	0.0036918	NA
Gm16016	ENSMUSG00000083538	0.0036918	NA
Gm14414	ENSMUSG00000083619	0.0036918	NA
Gm11662	ENSMUSG00000083748	0.0036918	NA
Gm14837	ENSMUSG00000083775	0.0036918	NA
Hmgb1-ps5	ENSMUSG00000083822	0.0036918	NA
Gm13831	ENSMUSG00000083875	0.0036918	NA
Gm13294	ENSMUSG00000083900	0.0036918	NA
Gm3835	ENSMUSG00000083922	0.0036918	NA
Rpl21-ps9	ENSMUSG00000084017	0.0036918	NA
Gm13169	ENSMUSG00000084127	0.0036918	NA
Gm12322	ENSMUSG00000084139	0.0036918	NA
Gm5398	ENSMUSG00000084202	0.0036918	NA
Gm12337	ENSMUSG00000084224	0.0036918	NA
Gm12417	ENSMUSG00000084267	0.0036918	NA
Gm13881	ENSMUSG00000084756	0.0036918	NA
Gm16135	ENSMUSG00000084985	0.0036918	NA
Gm15492	ENSMUSG00000085012	0.0036918	NA
Gm11646	ENSMUSG00000085033	0.0036918	NA
Egfros	ENSMUSG00000085091	0.0036918	NA
Gm12150	ENSMUSG00000085239	0.0036918	NA
Gm13943	ENSMUSG00000085277	0.0036918	NA
Gm12802	ENSMUSG00000085304	0.0036918	NA
4930529I22Rik	ENSMUSG00000085350	0.0036918	NA
Pard3bos3	ENSMUSG00000085400	0.0036918	NA
9430024E24Rik	ENSMUSG00000085463	0.0036918	NA
Gm11842	ENSMUSG00000085467	0.0036918	NA
Gm15691	ENSMUSG00000085472	0.0036918	NA
Gm15945	ENSMUSG00000085523	0.0036918	NA
Gm13166	ENSMUSG00000085525	0.0036918	NA
Gm16041	ENSMUSG00000085623	0.0036918	NA
Gm11493	ENSMUSG00000085646	0.0036918	NA
9130409J20Rik	ENSMUSG00000085683	0.0036918	NA
Gm12968	ENSMUSG00000085701	0.0036918	NA
Gm13442	ENSMUSG00000085737	0.0036918	NA
Gm6963	ENSMUSG00000085799	0.0036918	NA
Gm15178	ENSMUSG00000086053	0.0036918	NA
Gm11211	ENSMUSG00000086139	0.0036918	NA
Gm14206	ENSMUSG00000086163	0.0036918	NA
Gm14616	ENSMUSG00000086177	0.0036918	NA
Gm15563	ENSMUSG00000086387	0.0036918	NA
Gm16144	ENSMUSG00000086399	0.0036918	NA
Gm2639	ENSMUSG00000086458	0.0036918	NA
Gm14102	ENSMUSG00000086478	0.0036918	NA
Xist	ENSMUSG00000086503	0.0036918	NA
Gm13709	ENSMUSG00000086546	0.0036918	NA
Gm15444	ENSMUSG00000086556	0.0036918	NA
Gm12682	ENSMUSG00000086592	0.0036918	NA
Gm12064	ENSMUSG00000086612	0.0036918	NA
Gm16178	ENSMUSG00000086681	0.0036918	NA
Gm12867	ENSMUSG00000086683	0.0036918	NA
Gm16237	ENSMUSG00000086694	0.0036918	NA
Gm11685	ENSMUSG00000086733	0.0036918	NA
Gm13377	ENSMUSG00000086821	0.0036918	NA
4930512H18Rik	ENSMUSG00000086866	0.0036918	NA
Gm15755	ENSMUSG00000086910	0.0036918	NA
Gm15948	ENSMUSG00000086964	0.0036918	NA
Gm13839	ENSMUSG00000087124	0.0036918	NA
Gm13872	ENSMUSG00000087185	0.0036918	NA
Gm15317	ENSMUSG00000087282	0.0036918	NA
Gm15637	ENSMUSG00000087386	0.0036918	NA
Gm11752	ENSMUSG00000087404	0.0036918	NA
Gm15700	ENSMUSG00000087492	0.0036918	NA
Gm16121	ENSMUSG00000087606	0.0036918	NA
Gm13381	ENSMUSG00000087667	0.0036918	NA
Gm15674	ENSMUSG00000087691	0.0036918	NA
Gm16564	ENSMUSG00000089713	0.0036918	NA
Gm16117	ENSMUSG00000089723	0.0036918	NA
Gm16108	ENSMUSG00000089734	0.0036918	NA
Gm16575	ENSMUSG00000089796	0.0036918	NA
4933413C19Rik	ENSMUSG00000089952	0.0036918	NA
Gpx2-ps1	ENSMUSG00000089987	0.0036918	NA
Gm16297	ENSMUSG00000090047	0.0036918	NA
Gm16587	ENSMUSG00000090081	0.0036918	NA
Gm16103	ENSMUSG00000090243	0.0036918	NA
Gm17149	ENSMUSG00000090334	0.0036918	NA
Gm17158	ENSMUSG00000090552	0.0036918	NA
Cyp4f40	ENSMUSG00000090700	0.0036918	NA
Gm17105	ENSMUSG00000091079	0.0036918	NA
Gm2832	ENSMUSG00000091110	0.0036918	NA
Gm17020	ENSMUSG00000091149	0.0036918	NA
Gm17133	ENSMUSG00000091160	0.0036918	NA
Gm6665	ENSMUSG00000091561	0.0036918	NA
Gm7399	ENSMUSG00000091941	0.0036918	NA
H2-Pb	ENSMUSG00000092383	0.0036918	NA
Gm20485	ENSMUSG00000092402	0.0036918	NA
Gm20513	ENSMUSG00000092415	0.0036918	NA
Gm20482	ENSMUSG00000092490	0.0036918	NA
Gm4287	ENSMUSG00000092552	0.0036918	NA
Vmn1r-ps146	ENSMUSG00000093453	0.0036918	NA
Gm20717	ENSMUSG00000093695	0.0036918	NA
Olfr46	ENSMUSG00000093942	0.0036918	NA
Rpl31-ps14	ENSMUSG00000094191	0.0036918	NA
Gm20091	ENSMUSG00000094249	0.0036918	NA
Gm3373	ENSMUSG00000094370	0.0036918	NA
Gm5294	ENSMUSG00000094504	0.0036918	NA
Gm13271	ENSMUSG00000094618	0.0036918	NA
Gm8994	ENSMUSG00000094973	0.0036918	NA
Gm5866	ENSMUSG00000095078	0.0036918	NA
Gm21119	ENSMUSG00000095294	0.0036918	NA
Gm14328	ENSMUSG00000095419	0.0036918	NA
Gm8935	ENSMUSG00000095661	0.0036918	NA
Gm4461	ENSMUSG00000096169	0.0036918	NA
Moap1	ENSMUSG00000096458	0.0036918	NA
Gm21786	ENSMUSG00000096611	0.0036918	NA
Ifnz	ENSMUSG00000096854	0.0036918	NA
BC001981	ENSMUSG00000097022	0.0036918	NA
Gm26547	ENSMUSG00000097095	0.0036918	NA
1010001N08Rik	ENSMUSG00000097222	0.0036918	NA
Gm26768	ENSMUSG00000097257	0.0036918	NA
D630002J18Rik	ENSMUSG00000097293	0.0036918	NA
4930558J18Rik	ENSMUSG00000097519	0.0036918	NA
1700037F24Rik	ENSMUSG00000097540	0.0036918	NA
Gm2383	ENSMUSG00000097628	0.0036918	NA
C430002E04Rik	ENSMUSG00000097639	0.0036918	NA
Gm10532	ENSMUSG00000097712	0.0036918	NA
Gm26850	ENSMUSG00000097724	0.0036918	NA
Gm26899	ENSMUSG00000097799	0.0036918	NA
C130032M10Rik	ENSMUSG00000097821	0.0036918	NA
Gm5976	ENSMUSG00000097833	0.0036918	NA
Gm26867	ENSMUSG00000097873	0.0036918	NA
Gm3809	ENSMUSG00000097935	0.0036918	NA
Gm26967	ENSMUSG00000098014	0.0036918	NA
Gm27167	ENSMUSG00000098534	0.0036918	NA
Ms4a14	ENSMUSG00000099398	0.0036918	NA
RP23-204E23.2	ENSMUSG00000099422	0.0036918	NA
RP24-76E2.6	ENSMUSG00000099446	0.0036918	NA
RP23-103C10.3	ENSMUSG00000100119	0.0036918	NA
RP23-364J24B.1	ENSMUSG00000100402	0.0036918	NA
RP23-348P7.3	ENSMUSG00000100696	0.0036918	NA
RP23-404A6.7	ENSMUSG00000100744	0.0036918	NA
RP23-298N23.3	ENSMUSG00000100833	0.0036918	NA
RP23-29K12.9	ENSMUSG00000100963	0.0036918	NA
RP24-495G2.2	ENSMUSG00000101227	0.0036918	NA
RP24-147G7.3	ENSMUSG00000101400	0.0036918	NA
RP23-340C13.11	ENSMUSG00000101608	0.0036918	NA
RP23-76L21.2	ENSMUSG00000101880	0.0036918	NA
RP23-464K22.1	ENSMUSG00000101941	0.0036918	NA
RP23-421P10.1	ENSMUSG00000102012	0.0036918	NA
RP23-262K24.1	ENSMUSG00000102106	0.0036918	NA
Dgka	ENSMUSG00000025357	0.0037227	0.98342
Tead1	ENSMUSG00000055320	0.0037834	0.98844
Txnrd1	ENSMUSG00000020250	0.0038353	0.98333
Gm15246	ENSMUSG00000087159	0.0038534	NA
Mxd1	ENSMUSG00000001156	0.0038762	0.98523
Dhdh	ENSMUSG00000011382	0.0039212	0.98875
Rnf10	ENSMUSG00000041740	0.0039421	0.98523
Garnl3	ENSMUSG00000038860	0.0039598	0.98523
Glod4	ENSMUSG00000017286	0.0039848	0.98378
Fblim1	ENSMUSG00000006219	0.0040155	0.9909
Tbrg1	ENSMUSG00000011114	0.0040588	0.98523
Hsd3b1	ENSMUSG00000027871	0.0040705	NA
Gm10038	ENSMUSG00000058281	0.0040705	NA
Ankk1	ENSMUSG00000032257	0.0040725	NA
Fbxo7	ENSMUSG00000001786	0.0040943	0.98471
Muc5ac	ENSMUSG00000037974	0.0041048	NA
Gm12248	ENSMUSG00000086962	0.0041048	NA
Igsf23	ENSMUSG00000040498	0.004106	NA
Dapl1	ENSMUSG00000026989	0.0041099	NA
Gm14636	ENSMUSG00000073274	0.0041183	NA
Tyr	ENSMUSG00000004651	0.0041187	NA
Gm11534	ENSMUSG00000086255	0.0041187	NA
Gm15271	ENSMUSG00000086148	0.0041308	NA
Slc5a9	ENSMUSG00000028544	0.00414	NA
Gm14306	ENSMUSG00000078879	0.0041434	NA
Pacs2	ENSMUSG00000021143	0.0041534	0.97959
Gm13413	ENSMUSG00000083004	0.0041645	NA
Gm13963	ENSMUSG00000085448	0.0041778	NA
Cel	ENSMUSG00000026818	0.0041945	NA
Gm16156	ENSMUSG00000087436	0.004198	NA
Gm4986	ENSMUSG00000080996	0.0042154	NA
Gm16066	ENSMUSG00000082848	0.0042366	NA
Gm16741	ENSMUSG00000084775	0.0042366	NA
Procr	ENSMUSG00000027611	0.0042373	0.99078
Grin3b	ENSMUSG00000035745	0.0042522	0.99177
Gm10855	ENSMUSG00000075538	0.0042866	NA
4930583P06Rik	ENSMUSG00000086954	0.0042879	NA
Gm13868	ENSMUSG00000083306	0.0042927	NA
Ezh2	ENSMUSG00000029687	0.0043396	0.98696
Gm26536	ENSMUSG00000097501	0.0043406	NA
Coq5	ENSMUSG00000041733	0.0043854	0.9816
2010003K11Rik	ENSMUSG00000042041	0.0044122	NA
Mier2	ENSMUSG00000042570	0.0044308	0.9811
Trim30a	ENSMUSG00000030921	0.0044341	0.99078
Rps19-ps10	ENSMUSG00000089800	0.0044639	NA
Ssc5d	ENSMUSG00000035279	0.0044691	0.98961
Cd3eap	ENSMUSG00000047649	0.0044751	0.98543
Dnajb9	ENSMUSG00000014905	0.0044835	0.98445
4930467K11Rik	ENSMUSG00000097370	0.0045513	NA
Sfxn4	ENSMUSG00000063698	0.0045526	0.98385
Zfp821	ENSMUSG00000031728	0.0046579	0.98531
Ern2	ENSMUSG00000030866	0.0046798	NA
Grk1	ENSMUSG00000031450	0.0047635	NA
Mc5r	ENSMUSG00000007480	0.0047751	NA
Gm26691	ENSMUSG00000097911	0.0047979	NA
Blzf1	ENSMUSG00000026577	0.0047995	0.98199
Adck1	ENSMUSG00000021044	0.0048003	0.97938
Ank1	ENSMUSG00000031543	0.0048688	0.9845
Gm11412	ENSMUSG00000087540	0.0049579	NA
Mrps30	ENSMUSG00000021731	0.0049606	0.98452
Zfp784	ENSMUSG00000043290	0.0049658	0.98207
Topors	ENSMUSG00000036822	0.00499	0.98052
BC017158	ENSMUSG00000030780	0.0049941	0.97921
Bpifb4	ENSMUSG00000074665	0.0050335	NA
Lims1	ENSMUSG00000019920	0.0050453	0.98364
Kl	ENSMUSG00000058488	0.0050665	0.98961
Fam3c	ENSMUSG00000029672	0.0051398	0.96399
Stmn2	ENSMUSG00000027500	0.0051561	0.98225
Tspan6	ENSMUSG00000067377	0.0051588	0.98243
Hic1	ENSMUSG00000043099	0.0051636	0.98513
Dlg4	ENSMUSG00000020886	0.005165	0.98015
Klc1	ENSMUSG00000021288	0.0051854	0.9778
Klhl26	ENSMUSG00000055707	0.005206	0.97882
Exo1	ENSMUSG00000039748	0.0052306	NA
Cdcp1	ENSMUSG00000035498	0.0052433	NA
Gpc4	ENSMUSG00000031119	0.0053297	0.98373
Batf	ENSMUSG00000034266	0.0053381	NA
Glrx3	ENSMUSG00000031068	0.0053501	0.97401
Kng2	ENSMUSG00000060459	0.0053525	NA
Tekt5	ENSMUSG00000039179	0.0053907	0.98639
Pyurf	ENSMUSG00000043162	0.0054397	0.98004
Abcc2	ENSMUSG00000025194	0.0054608	NA
Git2	ENSMUSG00000041890	0.0055063	0.97641
Col27a1	ENSMUSG00000045672	0.0055185	0.98531
Gm10399	ENSMUSG00000072688	0.0055551	NA
Eps15l1	ENSMUSG00000006276	0.0055708	0.96964
Haus8	ENSMUSG00000035439	0.0055769	0.98523
Pglyrp2	ENSMUSG00000079563	0.0055788	NA
Rundc1	ENSMUSG00000035007	0.0056011	0.97921
Klhdc2	ENSMUSG00000020978	0.0056361	0.97968
Zan	ENSMUSG00000079173	0.0056657	NA
Gpr12	ENSMUSG00000041468	0.0057745	0.97269
Hgfac	ENSMUSG00000029102	0.0057803	NA
Gm15785	ENSMUSG00000082072	0.0058453	NA
Sox4	ENSMUSG00000076431	0.0058487	0.98523
Slc9a5	ENSMUSG00000014786	0.0058935	0.97852
Cep85	ENSMUSG00000037443	0.0059	0.96948
Camk2n1	ENSMUSG00000046447	0.0059083	0.97938
BC005561	ENSMUSG00000079065	0.0059345	0.98738
Zfp296	ENSMUSG00000011267	0.0060791	0.98783
Trbv13-2	ENSMUSG00000076469	0.0061014	NA
Gm27040	ENSMUSG00000098129	0.0061128	NA
RP23-459I23.6	ENSMUSG00000101983	0.0061174	NA
Tmem255b	ENSMUSG00000038457	0.0061399	0.98738
Gm11901	ENSMUSG00000084163	0.00614	NA
Gm15473	ENSMUSG00000084772	0.0061459	NA
Gm6921	ENSMUSG00000090074	0.0061459	NA
Them7	ENSMUSG00000055312	0.0061478	NA
Gm21885	ENSMUSG00000094091	0.0061478	NA
Olfr1349	ENSMUSG00000048067	0.0061505	NA
Gm21814	ENSMUSG00000096299	0.0061533	NA
Gm9358	ENSMUSG00000098199	0.0061561	NA
Gm3020	ENSMUSG00000079402	0.0061609	NA
Gm21028	ENSMUSG00000094462	0.0061609	NA
Redrum	ENSMUSG00000096982	0.0061638	NA
Gm10563	ENSMUSG00000073682	0.0061694	NA
Gm5096	ENSMUSG00000069324	0.0061816	NA
Ablim2	ENSMUSG00000029095	0.0061833	0.97362
Il19	ENSMUSG00000016524	0.006189	NA
Gm14928	ENSMUSG00000082718	0.0061925	NA
Gm12962	ENSMUSG00000087171	0.0061937	NA
1700106J16Rik	ENSMUSG00000034031	0.006203	NA
Gm14870	ENSMUSG00000081748	0.0062159	NA
E130018N17Rik	ENSMUSG00000087648	0.0062159	NA
RP24-502N12.2	ENSMUSG00000100221	0.0062159	NA
Mtnr1a	ENSMUSG00000054764	0.006217	NA
Gm15776	ENSMUSG00000082241	0.0062232	NA
RP24-211L16.2	ENSMUSG00000101834	0.0062314	NA
Asic5	ENSMUSG00000028008	0.0062316	NA
Ighj2	ENSMUSG00000076620	0.0062338	NA
Olfr523	ENSMUSG00000051051	0.0062391	NA
Gm13352	ENSMUSG00000086882	0.0062391	NA
Gm12871	ENSMUSG00000082200	0.0062438	NA
Gm7286	ENSMUSG00000098194	0.0062438	NA
Mmrn1	ENSMUSG00000054641	0.0062472	NA
Jmjd7	ENSMUSG00000098789	0.0062504	NA
Ppp2r2cos	ENSMUSG00000087487	0.0062533	NA
Gm16350	ENSMUSG00000090024	0.0062533	NA
Gm12902	ENSMUSG00000082515	0.0062647	NA
Gm12120	ENSMUSG00000087328	0.0062647	NA
Dlx6os2	ENSMUSG00000094868	0.0062657	NA
Akp3	ENSMUSG00000036500	0.006278	NA
Gm26849	ENSMUSG00000097720	0.0062811	NA
Olfr212	ENSMUSG00000053251	0.0062855	NA
Gm12539	ENSMUSG00000081615	0.0062855	NA
Asap3	ENSMUSG00000036995	0.0062859	0.9818
Gm9871	ENSMUSG00000052236	0.0062927	NA
Slc2a2	ENSMUSG00000027690	0.0063038	NA
Gm11873	ENSMUSG00000081964	0.0063072	NA
Cyp2j8	ENSMUSG00000082932	0.0063193	NA
Gm13379	ENSMUSG00000080846	0.0063286	NA
Gm26830	ENSMUSG00000097176	0.0063286	NA
Cbx4	ENSMUSG00000039989	0.006331	0.96658
Iqcf3	ENSMUSG00000023577	0.006341	NA
Gm5458	ENSMUSG00000095024	0.006341	NA
Shisa3	ENSMUSG00000050010	0.0063422	NA
Gm5145	ENSMUSG00000071273	0.0063488	NA
Gm17057	ENSMUSG00000090500	0.0063488	NA
Havcr1	ENSMUSG00000040405	0.006371	NA
Vmn1r-ps32	ENSMUSG00000061843	0.0063933	NA
BC030870	ENSMUSG00000074300	0.0063933	NA
Ube4bos2	ENSMUSG00000085807	0.006399	NA
Mettl4-ps1	ENSMUSG00000079356	0.0064062	NA
Stx5a	ENSMUSG00000010110	0.0064139	0.97063
Otor	ENSMUSG00000027416	0.0064252	NA
Pofut1	ENSMUSG00000046020	0.0064313	0.96964
Odf3l2	ENSMUSG00000035963	0.0064438	0.98543
Gm13837	ENSMUSG00000086055	0.0064659	NA
Gm9872	ENSMUSG00000098609	0.0064659	NA
Rnase10	ENSMUSG00000021872	0.0064754	NA
Dact2	ENSMUSG00000048826	0.0065259	0.98333
Gm16348	ENSMUSG00000085445	0.0065491	NA
Axl	ENSMUSG00000002602	0.0065844	0.97476
Eif1a	ENSMUSG00000057561	0.0065872	0.97362
6030443J06Rik	ENSMUSG00000097207	0.0066126	0.98678
Chmp7	ENSMUSG00000034190	0.0066407	0.96684
Gm11878	ENSMUSG00000081810	0.0066835	NA
Zcchc3	ENSMUSG00000074682	0.0066878	0.97476
Elp2	ENSMUSG00000024271	0.0067144	0.96537
Rbm4b	ENSMUSG00000033760	0.0067661	0.97205
Gm6039	ENSMUSG00000083736	0.0067691	NA
Cpxm2	ENSMUSG00000030862	0.0067718	0.98342
Ccdc169	ENSMUSG00000048655	0.0067996	NA
Trmt10b	ENSMUSG00000035601	0.006826	0.97146
Git1	ENSMUSG00000011877	0.0068374	0.98331
Rfng	ENSMUSG00000025158	0.0068568	0.98296
Tpra1	ENSMUSG00000002871	0.0069721	0.9823
Bach2it1	ENSMUSG00000087049	0.0070135	NA
Cxcl11	ENSMUSG00000060183	0.0070247	NA
Rccd1	ENSMUSG00000038930	0.0070313	0.98274
Rac1	ENSMUSG00000001847	0.0070515	0.95495
Wasf2	ENSMUSG00000028868	0.0070568	0.97546
Psd2	ENSMUSG00000024347	0.0070602	0.97767
Shisa2	ENSMUSG00000044461	0.0071035	0.97959
Prmt5	ENSMUSG00000023110	0.0071037	0.97476
4933406P04Rik	ENSMUSG00000069713	0.0071264	0.98543
Tox2	ENSMUSG00000074607	0.0072443	0.97835
C2cd4d	ENSMUSG00000091648	0.0072908	0.98342
Bin2	ENSMUSG00000098112	0.0073403	0.98225
Slc25a17	ENSMUSG00000022404	0.0073456	0.96543
Gm11963	ENSMUSG00000085189	0.0073598	0.98543
Chic2	ENSMUSG00000029229	0.0074724	0.97044
Gm12521	ENSMUSG00000085220	0.0074728	NA
Snapc1	ENSMUSG00000021113	0.007488	0.97362
Dlgap4	ENSMUSG00000061689	0.0075018	0.97322
Clstn1	ENSMUSG00000039953	0.0075198	0.97155
Ccl19	ENSMUSG00000071005	0.0075549	0.98523
Spatc1	ENSMUSG00000049653	0.0075893	NA
A330093E20Rik	ENSMUSG00000098284	0.0076216	0.98507
G6pc	ENSMUSG00000078650	0.0076622	NA
Rest	ENSMUSG00000029249	0.0076858	0.98225
Hdac9	ENSMUSG00000004698	0.007794	0.98034
Tmed4	ENSMUSG00000004394	0.0077957	0.94884
2810404F17Rik	ENSMUSG00000085329	0.0078318	NA
N6amt1	ENSMUSG00000044442	0.0078344	0.96505
2700068H02Rik	ENSMUSG00000086172	0.0078419	NA
Ppp1r21	ENSMUSG00000034709	0.007927	0.95076
Emc2	ENSMUSG00000022337	0.0079349	0.94498
Nccrp1	ENSMUSG00000047586	0.0079555	NA
RP23-402K24.6	ENSMUSG00000100370	0.0080033	0.975
Gm12706	ENSMUSG00000080967	0.0080803	NA
BC028777	ENSMUSG00000085185	0.0081249	NA
Gm17084	ENSMUSG00000091462	0.0081366	NA
Gm7618	ENSMUSG00000095288	0.0081429	NA
3830406C13Rik	ENSMUSG00000033111	0.0081476	0.95445
Lmx1b	ENSMUSG00000038765	0.0081594	NA
Slc25a12	ENSMUSG00000027010	0.0081693	0.93964
Egr3	ENSMUSG00000033730	0.0082676	0.98385
Gm9796	ENSMUSG00000045075	0.0082747	0.98052
Cxcl5	ENSMUSG00000029371	0.0083163	0.98385
Gm11889	ENSMUSG00000082876	0.0083173	NA
Gm27207	ENSMUSG00000098768	0.0083225	NA
Nelfb	ENSMUSG00000013465	0.0083268	0.95638
Matn3	ENSMUSG00000020583	0.0083378	NA
Slc22a30	ENSMUSG00000052562	0.0083402	NA
Gm15922	ENSMUSG00000081665	0.0083402	NA
Gm11893	ENSMUSG00000081789	0.0083468	NA
Gm26669	ENSMUSG00000097417	0.0083468	NA
Mageb18	ENSMUSG00000067649	0.0083652	NA
4933423P22Rik	ENSMUSG00000085471	0.0083652	NA
Gm16233	ENSMUSG00000085773	0.0083769	NA
Gm9625	ENSMUSG00000097906	0.0083867	0.98274
Gm5523	ENSMUSG00000097711	0.0083892	NA
1700049J03Rik	ENSMUSG00000011052	0.008392	NA
Rpl10a-ps2	ENSMUSG00000061988	0.008392	NA
RP23-269M3.3	ENSMUSG00000101257	0.008392	NA
Gm13921	ENSMUSG00000082328	0.0084009	NA
Gm6758	ENSMUSG00000081118	0.0084072	NA
Elk4	ENSMUSG00000026436	0.0084136	0.97309
Tbx19	ENSMUSG00000026572	0.0084136	NA
Akr1c21	ENSMUSG00000021207	0.0084167	NA
Gm16217	ENSMUSG00000086499	0.0084167	NA
Serpinb10	ENSMUSG00000092572	0.008419	NA
Gm26753	ENSMUSG00000097759	0.008419	NA
Gm3550	ENSMUSG00000078240	0.008427	NA
Capn8	ENSMUSG00000038599	0.0084339	NA
Olfr691	ENSMUSG00000043948	0.0084433	NA
Gm8378	ENSMUSG00000090722	0.0084477	NA
Gm13181	ENSMUSG00000081070	0.008453	NA
Krt33a	ENSMUSG00000035592	0.0084773	NA
4933405D12Rik	ENSMUSG00000097852	0.0084773	NA
Tmem18	ENSMUSG00000043061	0.008484	0.97269
Gm12336	ENSMUSG00000085359	0.0084847	NA
RP24-108I6.2	ENSMUSG00000100367	0.0084864	NA
Iglv1	ENSMUSG00000076934	0.0084919	NA
H2afy2	ENSMUSG00000020086	0.0085099	0.96449
Gm12291	ENSMUSG00000081756	0.008518	NA
Gm9795	ENSMUSG00000045048	0.0085223	NA
Gm13012	ENSMUSG00000085823	0.0085223	NA
Gm14810	ENSMUSG00000083603	0.0085244	NA
Gm5612	ENSMUSG00000074501	0.0085273	NA
Trem1	ENSMUSG00000042265	0.0085344	NA
Gm6161	ENSMUSG00000081441	0.0085409	NA
Gm16302	ENSMUSG00000090023	0.0085441	NA
Gm2244	ENSMUSG00000092036	0.0085476	NA
Gm9013	ENSMUSG00000087286	0.0085574	NA
Cela2a	ENSMUSG00000058579	0.0085721	NA
Tmbim7	ENSMUSG00000014529	0.0085811	NA
Shbg	ENSMUSG00000005202	0.0085934	NA
Dhrs7c	ENSMUSG00000033044	0.0085976	NA
Gm4907	ENSMUSG00000068113	0.0086095	NA
Vps4a	ENSMUSG00000031913	0.0086142	0.95494
Nphp1	ENSMUSG00000027378	0.0086211	0.9643
Gm6768	ENSMUSG00000021908	0.0086368	0.98348
Dab2	ENSMUSG00000022150	0.008645	0.98309
Pax9	ENSMUSG00000001497	0.0086463	NA
RP23-408A1.1	ENSMUSG00000100783	0.0086578	NA
RP23-315C11.9	ENSMUSG00000099478	0.0086679	0.97581
Gm15365	ENSMUSG00000080777	0.0086778	NA
Ly6i	ENSMUSG00000022586	0.0086803	NA
Foxa1	ENSMUSG00000035451	0.0087239	NA
Gdf9	ENSMUSG00000018238	0.0087242	0.98062
RP23-32P19.3	ENSMUSG00000100084	0.0087578	NA
B020018G12Rik	ENSMUSG00000078184	0.0087684	NA
Gm13268	ENSMUSG00000070271	0.0087887	NA
Ybx1	ENSMUSG00000028639	0.0088411	0.94838
Hat1	ENSMUSG00000027018	0.0088677	0.9613
Crip3	ENSMUSG00000023968	0.0088965	0.98299
Ngfr	ENSMUSG00000000120	0.008928	0.97581
Ftsj3	ENSMUSG00000020706	0.0090204	0.95933
Cyth1	ENSMUSG00000017132	0.0090756	0.96121
Sufu	ENSMUSG00000025231	0.0091024	0.96845
Gm6517	ENSMUSG00000082420	0.0091124	NA
Spag6	ENSMUSG00000022783	0.0091918	0.97662
Asah2	ENSMUSG00000024887	0.0092156	0.98128
Slc39a5	ENSMUSG00000039878	0.0092434	0.98274
Smad2	ENSMUSG00000024563	0.009265	0.96466
Adtrp	ENSMUSG00000058022	0.0092933	NA
1700001P01Rik	ENSMUSG00000018543	0.0093206	NA
Zfp541	ENSMUSG00000078796	0.009328	0.98274
AW209491	ENSMUSG00000039182	0.0094683	0.95678
Gm17098	ENSMUSG00000091745	0.0094766	0.98274
Gja1	ENSMUSG00000050953	0.0095194	0.96543
Hkdc1	ENSMUSG00000020080	0.0095445	0.97408
Ctbp2	ENSMUSG00000030970	0.0095517	0.96653
Uba1y	ENSMUSG00000069053	0.0096358	NA
Gm26520	ENSMUSG00000097429	0.0096607	NA
Gm7745	ENSMUSG00000098029	0.0097047	NA
Kirrel3os	ENSMUSG00000053889	0.0097245	NA
Gm6910	ENSMUSG00000055763	0.0097375	NA
Pck2	ENSMUSG00000040618	0.0097399	0.97315
Mapk8ip2	ENSMUSG00000022619	0.0097543	0.96543
Gm12017	ENSMUSG00000084413	0.0097782	NA
Hnrnpu	ENSMUSG00000039630	0.0097941	0.97362
Isyna1	ENSMUSG00000019139	0.0097963	0.97633
Gm13483	ENSMUSG00000085862	0.0098685	NA
Mcts1	ENSMUSG00000000355	0.0099126	0.96324
Coq9	ENSMUSG00000031782	0.0099127	0.95076
Tcf21	ENSMUSG00000045680	0.0099274	NA
Gm7860	ENSMUSG00000082535	0.0099615	NA
1110028F11Rik	ENSMUSG00000085972	0.0099638	NA
Was	ENSMUSG00000031165	0.0099798	0.97487
Pars2	ENSMUSG00000043572	0.0099905	0.96717
Gssos1	ENSMUSG00000085010	0.010014	NA
Fbxo24	ENSMUSG00000089984	0.010015	0.9818
Kcnmb3	ENSMUSG00000091091	0.010096	NA
Gm4462	ENSMUSG00000090319	0.010137	NA
Liph	ENSMUSG00000044626	0.010146	0.98137
Pxmp4	ENSMUSG00000000876	0.010202	0.9603
Rft1	ENSMUSG00000052395	0.010216	0.96337
Tbc1d12	ENSMUSG00000048720	0.01026	0.97183
Rabepk	ENSMUSG00000070953	0.010263	0.95493
Ccdc138	ENSMUSG00000038010	0.010266	0.97659
Sis	ENSMUSG00000027790	0.010271	NA
Olfr61	ENSMUSG00000096069	0.010292	NA
Sntb2	ENSMUSG00000041308	0.010296	0.98076
Tdo2	ENSMUSG00000028011	0.010298	0.97641
Ccdc109b	ENSMUSG00000027994	0.010309	0.97677
Gm26747	ENSMUSG00000097783	0.01031	0.9812
Ist1	ENSMUSG00000031729	0.01033	0.93553
Erich2os	ENSMUSG00000086515	0.010332	NA
E2f7	ENSMUSG00000020185	0.010333	NA
Trim35	ENSMUSG00000022043	0.010344	0.95753
Gm17660	ENSMUSG00000091034	0.010345	NA
Pkd1l1	ENSMUSG00000046634	0.01035	NA
Gm26681	ENSMUSG00000097818	0.010379	NA
Gm21847	ENSMUSG00000094230	0.01041	NA
Scpep1	ENSMUSG00000000278	0.010438	0.96325
Il1rn	ENSMUSG00000026981	0.010441	NA
Evl	ENSMUSG00000021262	0.010482	0.96241
Hdhd2	ENSMUSG00000025421	0.010493	0.93933
Gm13157	ENSMUSG00000078495	0.010502	0.96964
Trav15n-1	ENSMUSG00000094413	0.010532	NA
Wwc1	ENSMUSG00000018849	0.01055	0.95396
Ddx54	ENSMUSG00000029599	0.01055	0.96975
Gm18355	ENSMUSG00000093773	0.010587	NA
Gm3671	ENSMUSG00000098232	0.010592	NA
Rsph3a	ENSMUSG00000073471	0.010639	0.96535
Usp4	ENSMUSG00000032612	0.010649	0.92788
Serpina3e-ps	ENSMUSG00000091553	0.010743	NA
Ctps	ENSMUSG00000028633	0.010754	0.93256
Ces1f	ENSMUSG00000031725	0.010782	NA
Gm11529	ENSMUSG00000075586	0.010801	NA
Slc25a14	ENSMUSG00000031105	0.010817	0.96298
Gm26829	ENSMUSG00000097173	0.01084	NA
Ctcfl	ENSMUSG00000070495	0.010841	NA
Kat2a	ENSMUSG00000020918	0.010874	0.96543
Xylb	ENSMUSG00000035769	0.010894	0.96711
Sympk	ENSMUSG00000023118	0.01092	0.96888
Gm26772	ENSMUSG00000097136	0.010924	NA
Rps19-ps7	ENSMUSG00000080006	0.010931	NA
Gm13479	ENSMUSG00000085591	0.010942	NA
Gm26764	ENSMUSG00000097667	0.010956	NA
Treml4	ENSMUSG00000051682	0.010992	NA
Gm14863	ENSMUSG00000083608	0.011122	NA
Frmd5	ENSMUSG00000027238	0.011149	0.95445
Tcf7	ENSMUSG00000000782	0.011194	0.96969
Spats1	ENSMUSG00000023935	0.011209	0.97388
Cnot8	ENSMUSG00000020515	0.011284	0.92753
Abca1	ENSMUSG00000015243	0.011288	0.97563
Mesdc2	ENSMUSG00000038503	0.011363	0.95066
Atf7ip2	ENSMUSG00000039200	0.011402	NA
Nek7	ENSMUSG00000026393	0.011422	0.95804
Rttn	ENSMUSG00000023066	0.011423	0.97577
Osbpl2	ENSMUSG00000039050	0.011424	0.91857
Gm12034	ENSMUSG00000083878	0.01147	NA
Cxcr2	ENSMUSG00000026180	0.011475	NA
Fcgr2b	ENSMUSG00000026656	0.011485	0.9711
RP23-451E8.1	ENSMUSG00000099891	0.011525	NA
Mmd2	ENSMUSG00000039533	0.011534	0.95491
Galnt16	ENSMUSG00000021130	0.011546	0.94482
Fgf9	ENSMUSG00000021974	0.011599	0.97026
Gm12631	ENSMUSG00000084809	0.011613	NA
Cbx6	ENSMUSG00000089715	0.011641	0.92279
9930104L06Rik	ENSMUSG00000044730	0.011647	0.93953
Dock1	ENSMUSG00000058325	0.011653	0.96941
Kdm1a	ENSMUSG00000036940	0.011678	0.94028
4930505N22Rik	ENSMUSG00000097690	0.011682	NA
Snx9	ENSMUSG00000002365	0.011729	0.95791
Tmem9b	ENSMUSG00000031021	0.01173	0.93205
Tom1l1	ENSMUSG00000020541	0.011732	0.95678
Adhfe1	ENSMUSG00000025911	0.011768	0.95076
Gm26789	ENSMUSG00000096991	0.011798	NA
Gm6283	ENSMUSG00000098057	0.011815	NA
Gm10320	ENSMUSG00000092116	0.011819	NA
Slc26a11	ENSMUSG00000039908	0.011825	0.95804
Kif7	ENSMUSG00000050382	0.011827	0.96786
Gramd4	ENSMUSG00000035900	0.011835	0.96537
D1Ertd622e	ENSMUSG00000044768	0.011863	0.94216
Gm8055	ENSMUSG00000096171	0.011876	NA
Bai2	ENSMUSG00000028782	0.011932	0.96839
Qrfpr	ENSMUSG00000058400	0.011964	0.97543
Vav1	ENSMUSG00000034116	0.011966	0.96037
Pdlim5	ENSMUSG00000028273	0.01203	0.96121
Colec10	ENSMUSG00000038591	0.012032	NA
Zfp511	ENSMUSG00000025470	0.012039	0.95263
Mrpl47	ENSMUSG00000037531	0.012081	0.95445
Gm853	ENSMUSG00000023120	0.012083	NA
Gm3278	ENSMUSG00000091185	0.012083	NA
4930426I24Rik	ENSMUSG00000097323	0.012107	NA
Sync	ENSMUSG00000001333	0.012146	0.97668
Gm7665	ENSMUSG00000063628	0.012147	NA
Dscc1	ENSMUSG00000022422	0.012167	NA
1700067P10Rik	ENSMUSG00000021545	0.012182	NA
Mybphl	ENSMUSG00000068745	0.012187	NA
Lyn	ENSMUSG00000042228	0.0122	0.95115
Gm3654	ENSMUSG00000092624	0.012269	NA
Gm17344	ENSMUSG00000078143	0.012272	NA
Mchr1	ENSMUSG00000050164	0.012319	0.96653
Map2k7	ENSMUSG00000002948	0.012322	0.91605
Olfm3	ENSMUSG00000027965	0.012341	0.97239
Fhod1	ENSMUSG00000014778	0.012345	0.96964
Sap30bp	ENSMUSG00000020755	0.012374	0.95283
Gm15351	ENSMUSG00000086770	0.012412	0.97689
Gm12104	ENSMUSG00000084146	0.012425	NA
4930469G21Rik	ENSMUSG00000049160	0.012449	NA
1700122E12Rik	ENSMUSG00000087685	0.012522	NA
Actr1a	ENSMUSG00000025228	0.01254	0.95445
Cfl2	ENSMUSG00000062929	0.012541	0.93487
Tmem161a	ENSMUSG00000002342	0.012543	0.9467
Sh2d2a	ENSMUSG00000028071	0.012544	NA
Zfp572	ENSMUSG00000098528	0.012593	NA
Rpp38	ENSMUSG00000049950	0.012609	0.95804
RP23-114A6.2	ENSMUSG00000099590	0.012626	NA
Gm9392	ENSMUSG00000087298	0.012652	NA
Rtp1	ENSMUSG00000033383	0.01267	0.97545
Dnajc30	ENSMUSG00000061118	0.012711	0.97025
Clec4a2	ENSMUSG00000030148	0.012719	0.97505
Gm5507	ENSMUSG00000069376	0.012755	NA
RP23-302H1.2	ENSMUSG00000100927	0.012764	NA
Gm14022	ENSMUSG00000087151	0.012778	NA
Gm14036	ENSMUSG00000082399	0.012828	NA
RP24-105B23.1	ENSMUSG00000099370	0.01286	NA
Mxi1	ENSMUSG00000025025	0.012929	0.9329
Gm10277	ENSMUSG00000069804	0.012951	NA
Clec5a	ENSMUSG00000029915	0.01297	0.97044
Hoga1	ENSMUSG00000025176	0.012975	0.96888
Prmt2	ENSMUSG00000020230	0.012984	0.94453
Ccdc84	ENSMUSG00000043923	0.013008	0.97019
Epb4.1l4b	ENSMUSG00000028434	0.013025	0.94453
Gm6569	ENSMUSG00000086361	0.013036	0.97581
Rgs6	ENSMUSG00000021219	0.013058	0.96964
Cyp4f18	ENSMUSG00000003484	0.013105	NA
Rsg1	ENSMUSG00000073733	0.013109	0.97269
Nppb	ENSMUSG00000029019	0.013131	NA
Gpr160	ENSMUSG00000037661	0.01323	0.97543
Derl1	ENSMUSG00000022365	0.013236	0.90035
RP23-242C19.8	ENSMUSG00000101716	0.01329	NA
Brcc3	ENSMUSG00000031201	0.013294	0.91913
Gm20508	ENSMUSG00000092604	0.013295	NA
Akr1cl	ENSMUSG00000025955	0.013311	NA
Nr6a1	ENSMUSG00000063972	0.013327	0.96624
Hps6	ENSMUSG00000074811	0.013352	0.95804
Gm10110	ENSMUSG00000062093	0.013363	0.97269
Ak9	ENSMUSG00000091415	0.013414	0.97545
Mrpl49	ENSMUSG00000007338	0.013456	0.95254
Rpsa-ps4	ENSMUSG00000081076	0.013466	NA
Ddx1	ENSMUSG00000037149	0.013483	0.92121
Snx31	ENSMUSG00000013611	0.013504	0.97543
Spag4	ENSMUSG00000038180	0.013509	0.96
A930012L18Rik	ENSMUSG00000097610	0.013542	0.97318
Trpc2	ENSMUSG00000070425	0.013552	NA
Chdc2	ENSMUSG00000094900	0.013571	NA
Tmsb10	ENSMUSG00000079523	0.013577	0.97146
Gm11545	ENSMUSG00000075611	0.013578	NA
Gm20511	ENSMUSG00000092371	0.013587	NA
Cass4	ENSMUSG00000074570	0.013629	NA
Cenpl	ENSMUSG00000026708	0.013639	0.97044
Abca8a	ENSMUSG00000041828	0.013664	0.95892
Foxn2	ENSMUSG00000034998	0.013707	0.96361
Smg5	ENSMUSG00000001415	0.013773	0.94161
Dirc2	ENSMUSG00000022848	0.013786	0.89132
Gm7276	ENSMUSG00000073532	0.013795	0.9709
Bmx	ENSMUSG00000031377	0.013857	0.97257
Gpnmb	ENSMUSG00000029816	0.013901	0.95915
Megf10	ENSMUSG00000024593	0.013921	0.95804
Mccc1os	ENSMUSG00000086392	0.013934	0.97019
Gm8369	ENSMUSG00000058470	0.013936	NA
4933429H19Rik	ENSMUSG00000097786	0.013978	NA
Gm11638	ENSMUSG00000086487	0.013994	NA
Slc25a43	ENSMUSG00000037636	0.014034	NA
Cmtr1	ENSMUSG00000024019	0.01404	0.95883
Slc37a2	ENSMUSG00000032122	0.014066	0.97368
Khdc1b	ENSMUSG00000085079	0.014073	NA
Phax	ENSMUSG00000008301	0.014078	0.93076
Grm3	ENSMUSG00000003974	0.014093	0.95448
Nrg2	ENSMUSG00000060275	0.014106	0.95601
E130308A19Rik	ENSMUSG00000045071	0.01412	0.94838
Gm9970	ENSMUSG00000055424	0.014129	NA
Gnb5	ENSMUSG00000032192	0.014137	0.93838
Gm14088	ENSMUSG00000081413	0.014177	NA
Steap4	ENSMUSG00000012428	0.014205	NA
Sema3f	ENSMUSG00000034684	0.014221	0.97322
Dyrk1b	ENSMUSG00000002409	0.014226	0.96716
Slc11a2	ENSMUSG00000023030	0.014333	0.9118
Eldr	ENSMUSG00000087060	0.014338	NA
Gm13389	ENSMUSG00000087079	0.014338	NA
Rqcd1	ENSMUSG00000026174	0.014364	0.93296
Inhbc	ENSMUSG00000025405	0.014371	NA
Kcnj8	ENSMUSG00000030247	0.014384	0.96505
Gpx8	ENSMUSG00000021760	0.014414	0.97219
Rpf1	ENSMUSG00000028187	0.014425	0.94859
Syt5	ENSMUSG00000004961	0.014427	0.96121
Fam71d	ENSMUSG00000056987	0.014458	NA
Gm15801	ENSMUSG00000096592	0.014477	NA
Snx7	ENSMUSG00000028007	0.014506	0.95123
2810455O05Rik	ENSMUSG00000085030	0.014514	0.96126
Timm8a1	ENSMUSG00000048007	0.014523	0.96561
Svop	ENSMUSG00000042078	0.014524	0.95828
Olfr1507	ENSMUSG00000059887	0.014564	NA
Gm13498	ENSMUSG00000083270	0.014588	NA
Gm16487	ENSMUSG00000078251	0.014609	NA
RP24-479J14.1	ENSMUSG00000099869	0.014632	NA
Stambpl1	ENSMUSG00000024776	0.014658	0.9429
1810013L24Rik	ENSMUSG00000022507	0.014736	0.93723
Gm8566	ENSMUSG00000047905	0.014739	0.97315
Ptp4a3	ENSMUSG00000059895	0.014814	0.96543
Gm7204	ENSMUSG00000048164	0.014821	NA
Tes3-ps	ENSMUSG00000096252	0.014835	NA
Pex3	ENSMUSG00000019809	0.014859	0.9282
Gnas	ENSMUSG00000027523	0.014874	0.9607
4833417C18Rik	ENSMUSG00000086015	0.014875	NA
Gm20493	ENSMUSG00000092246	0.014894	NA
E130304I02Rik	ENSMUSG00000044997	0.01492	NA
Tob2	ENSMUSG00000078960	0.014923	NA
Nox1	ENSMUSG00000031257	0.014958	NA
Dynll2	ENSMUSG00000020483	0.01498	0.90618
Degs1	ENSMUSG00000038633	0.015003	0.92454
Gm13480	ENSMUSG00000085357	0.015081	NA
Ppapdc1a	ENSMUSG00000070366	0.015118	0.96379
Gm26518	ENSMUSG00000097234	0.015125	NA
Ap3s1	ENSMUSG00000024480	0.015152	0.91857
Tmem29	ENSMUSG00000041353	0.015156	0.94094
Cc2d1a	ENSMUSG00000036686	0.015172	0.95921
Gm15222	ENSMUSG00000086746	0.015174	NA
Oxsr1	ENSMUSG00000036737	0.015194	0.95371
Zfp664	ENSMUSG00000079215	0.015195	0.9502
Gm18284	ENSMUSG00000092325	0.015203	NA
Btbd10	ENSMUSG00000038187	0.015269	0.93953
Tmem201	ENSMUSG00000044700	0.015358	0.93252
Kcne2	ENSMUSG00000039672	0.015382	0.94848
Hoxa10	ENSMUSG00000000938	0.015458	NA
Hoxd13	ENSMUSG00000001819	0.015458	NA
Il12b	ENSMUSG00000004296	0.015458	NA
Fcer1a	ENSMUSG00000005339	0.015458	NA
Abhd1	ENSMUSG00000006638	0.015458	NA
Spaca7	ENSMUSG00000010435	0.015458	NA
4930579F01Rik	ENSMUSG00000012042	0.015458	NA
Svs5	ENSMUSG00000017004	0.015458	NA
Hnf4g	ENSMUSG00000017688	0.015458	NA
Zc2hc1b	ENSMUSG00000019815	0.015458	NA
Ros1	ENSMUSG00000019893	0.015458	NA
Ccl1	ENSMUSG00000020702	0.015458	NA
Krt36	ENSMUSG00000020916	0.015458	NA
Gm9745	ENSMUSG00000021148	0.015458	NA
Slc17a1	ENSMUSG00000021335	0.015458	NA
Med10	ENSMUSG00000021598	0.015458	NA
Rhag	ENSMUSG00000023926	0.015458	NA
Crisp2	ENSMUSG00000023930	0.015458	NA
Proc	ENSMUSG00000024386	0.015458	NA
Pou5f1	ENSMUSG00000024406	0.015458	NA
Ms4a3	ENSMUSG00000024681	0.015458	NA
Cyp2c55	ENSMUSG00000025002	0.015458	NA
Bnc1	ENSMUSG00000025105	0.015458	NA
Hsd17b6	ENSMUSG00000025396	0.015458	NA
Crisp1	ENSMUSG00000025431	0.015458	NA
Rp1	ENSMUSG00000025900	0.015458	NA
Serpinb11	ENSMUSG00000026327	0.015458	NA
Slco6c1	ENSMUSG00000026331	0.015458	NA
Daf2	ENSMUSG00000026401	0.015458	NA
Wdr64	ENSMUSG00000026523	0.015458	NA
Apcs	ENSMUSG00000026542	0.015458	NA
4930562F07Rik	ENSMUSG00000026729	0.015458	NA
Defb22	ENSMUSG00000027468	0.015458	NA
Kif12	ENSMUSG00000028357	0.015458	NA
2310002L09Rik	ENSMUSG00000028396	0.015458	NA
4921539E11Rik	ENSMUSG00000028520	0.015458	NA
Pla2g2e	ENSMUSG00000028751	0.015458	NA
Chrna9	ENSMUSG00000029205	0.015458	NA
U90926	ENSMUSG00000029409	0.015458	NA
Tmem213	ENSMUSG00000029829	0.015458	NA
Hoxa1	ENSMUSG00000029844	0.015458	NA
Clec4e	ENSMUSG00000030142	0.015458	NA
Clec2e	ENSMUSG00000030155	0.015458	NA
Klra13-ps	ENSMUSG00000030178	0.015458	NA
Clec2i	ENSMUSG00000030365	0.015458	NA
Lypd5	ENSMUSG00000030484	0.015458	NA
Asb9	ENSMUSG00000031384	0.015458	NA
Prame	ENSMUSG00000031411	0.015458	NA
Dkk4	ENSMUSG00000031535	0.015458	NA
1700011L22Rik	ENSMUSG00000031682	0.015458	NA
Cyp1a2	ENSMUSG00000032310	0.015458	NA
Tinag	ENSMUSG00000032357	0.015458	NA
Acsm1	ENSMUSG00000033533	0.015458	NA
4930556J24Rik	ENSMUSG00000034493	0.015458	NA
Vax2	ENSMUSG00000034777	0.015458	NA
Mia2	ENSMUSG00000035349	0.015458	NA
1600014K23Rik	ENSMUSG00000035491	0.015458	NA
Ugt2b35	ENSMUSG00000035811	0.015458	NA
Ugt2b1	ENSMUSG00000035836	0.015458	NA
Hoxc9	ENSMUSG00000036139	0.015458	NA
Glt6d1	ENSMUSG00000036401	0.015458	NA
Gjd4	ENSMUSG00000036855	0.015458	NA
Clca5	ENSMUSG00000036960	0.015458	NA
Hand1	ENSMUSG00000037335	0.015458	NA
Cldn16	ENSMUSG00000038148	0.015458	NA
Cer1	ENSMUSG00000038192	0.015458	NA
Nepn	ENSMUSG00000038624	0.015458	NA
Orm1	ENSMUSG00000039196	0.015458	NA
Il22ra2	ENSMUSG00000039760	0.015458	NA
Cyp2b23	ENSMUSG00000040650	0.015458	NA
Iqcf4	ENSMUSG00000041009	0.015458	NA
Slc7a13	ENSMUSG00000041052	0.015458	NA
H1foo	ENSMUSG00000042279	0.015458	NA
Hoxd9	ENSMUSG00000043342	0.015458	NA
Gm5867	ENSMUSG00000043484	0.015458	NA
Olfr544	ENSMUSG00000043925	0.015458	NA
Nkx2-3	ENSMUSG00000044220	0.015458	NA
Psg22	ENSMUSG00000044903	0.015458	NA
Olfr1030	ENSMUSG00000044923	0.015458	NA
4933402E13Rik	ENSMUSG00000045330	0.015458	NA
Lce3c	ENSMUSG00000045475	0.015458	NA
Olfr460	ENSMUSG00000045514	0.015458	NA
Gm4997	ENSMUSG00000045694	0.015458	NA
4930451I11Rik	ENSMUSG00000045989	0.015458	NA
4930550L24Rik	ENSMUSG00000046180	0.015458	NA
Lce1l	ENSMUSG00000046676	0.015458	NA
Spesp1	ENSMUSG00000046846	0.015458	NA
Catsperb	ENSMUSG00000047014	0.015458	NA
Ccer1	ENSMUSG00000047025	0.015458	NA
Ofcc1	ENSMUSG00000047094	0.015458	NA
Crry-ps	ENSMUSG00000047657	0.015458	NA
Ang2	ENSMUSG00000047894	0.015458	NA
Krt35	ENSMUSG00000048013	0.015458	NA
Foxi2	ENSMUSG00000048377	0.015458	NA
Olfr368	ENSMUSG00000049018	0.015458	NA
Il23r	ENSMUSG00000049093	0.015458	NA
Sppl2c	ENSMUSG00000049506	0.015458	NA
Zfa-ps	ENSMUSG00000049576	0.015458	NA
Sprr2b	ENSMUSG00000050092	0.015458	NA
Gpr18	ENSMUSG00000050350	0.015458	NA
Tnfsf15	ENSMUSG00000050395	0.015458	NA
4933406M09Rik	ENSMUSG00000050526	0.015458	NA
Olfr330	ENSMUSG00000050818	0.015458	NA
Clrn3	ENSMUSG00000050866	0.015458	NA
Olfr335-ps	ENSMUSG00000051052	0.015458	NA
Gm9857	ENSMUSG00000051638	0.015458	NA
Kctd19	ENSMUSG00000051648	0.015458	NA
Gm9864	ENSMUSG00000052005	0.015458	NA
Gm9870	ENSMUSG00000052154	0.015458	NA
Gm9877	ENSMUSG00000052426	0.015458	NA
Cib4	ENSMUSG00000053194	0.015458	NA
BC048502	ENSMUSG00000053508	0.015458	NA
4732471J01Rik	ENSMUSG00000053714	0.015458	NA
Oas1f	ENSMUSG00000053765	0.015458	NA
Aym1	ENSMUSG00000053873	0.015458	NA
Gm14461	ENSMUSG00000054510	0.015458	NA
Gm9961	ENSMUSG00000055015	0.015458	NA
Spink5	ENSMUSG00000055561	0.015458	NA
Gm9985	ENSMUSG00000055872	0.015458	NA
Foxi3	ENSMUSG00000055874	0.015458	NA
Gm9992	ENSMUSG00000056133	0.015458	NA
D830013O20Rik	ENSMUSG00000056359	0.015458	NA
Hoxaas2	ENSMUSG00000056445	0.015458	NA
Gm10000	ENSMUSG00000056606	0.015458	NA
Olfr533	ENSMUSG00000056883	0.015458	NA
1700010B08Rik	ENSMUSG00000057047	0.015458	NA
AF366264	ENSMUSG00000057116	0.015458	NA
Ms4a13	ENSMUSG00000057240	0.015458	NA
Rpl21-ps12	ENSMUSG00000057370	0.015458	NA
Dcpp3	ENSMUSG00000057417	0.015458	NA
Olfr1508	ENSMUSG00000057564	0.015458	NA
Olfr668	ENSMUSG00000057770	0.015458	NA
Olfr541	ENSMUSG00000057997	0.015458	NA
Defb35	ENSMUSG00000058052	0.015458	NA
H2-M10.3	ENSMUSG00000058124	0.015458	NA
Xlr3c	ENSMUSG00000058147	0.015458	NA
BC021614	ENSMUSG00000058216	0.015458	NA
1700008I05Rik	ENSMUSG00000058252	0.015458	NA
Gm10040	ENSMUSG00000058360	0.015458	NA
Rpl27a-ps2	ENSMUSG00000058430	0.015458	NA
Dppa4	ENSMUSG00000058550	0.015458	NA
Defb50	ENSMUSG00000058568	0.015458	NA
Tas2r125	ENSMUSG00000059410	0.015458	NA
Gm5528	ENSMUSG00000059483	0.015458	NA
Olfr248	ENSMUSG00000059503	0.015458	NA
Olfr222	ENSMUSG00000059610	0.015458	NA
Clec4a4	ENSMUSG00000059639	0.015458	NA
Serpinb12	ENSMUSG00000059956	0.015458	NA
Klk1b22	ENSMUSG00000060177	0.015458	NA
Spink7	ENSMUSG00000060201	0.015458	NA
Gm8203	ENSMUSG00000060214	0.015458	NA
Gm5591	ENSMUSG00000060565	0.015458	NA
Ang4	ENSMUSG00000060615	0.015458	NA
Tcl1b2	ENSMUSG00000060863	0.015458	NA
Plac1	ENSMUSG00000061082	0.015458	NA
Cyp3a59	ENSMUSG00000061292	0.015458	NA
Cfd	ENSMUSG00000061780	0.015458	NA
Dsg1b	ENSMUSG00000061928	0.015458	NA
Slc2a7	ENSMUSG00000062064	0.015458	NA
Ear6	ENSMUSG00000062148	0.015458	NA
Ctrc	ENSMUSG00000062478	0.015458	NA
Gm6378	ENSMUSG00000062962	0.015458	NA
Gm4825	ENSMUSG00000063548	0.015458	NA
Zfp600	ENSMUSG00000066007	0.015458	NA
Cyp4a10	ENSMUSG00000066072	0.015458	NA
AY512931	ENSMUSG00000066158	0.015458	NA
Gm10163	ENSMUSG00000066443	0.015458	NA
Gm7493	ENSMUSG00000066693	0.015458	NA
Rps15a-ps2	ENSMUSG00000067351	0.015458	NA
Olfr1428	ENSMUSG00000067524	0.015458	NA
Ms4a15	ENSMUSG00000067571	0.015458	NA
Khdc1a	ENSMUSG00000067750	0.015458	NA
Grxcr1	ENSMUSG00000068082	0.015458	NA
Ssxb9	ENSMUSG00000068218	0.015458	NA
4930403O15Rik	ENSMUSG00000068638	0.015458	NA
Olfr1140	ENSMUSG00000068817	0.015458	NA
Zdhhc11	ENSMUSG00000069189	0.015458	NA
Hist1h2ah	ENSMUSG00000069302	0.015458	NA
Hist1h2br	ENSMUSG00000069303	0.015458	NA
Hist1h2an	ENSMUSG00000069309	0.015458	NA
Hist1h3c	ENSMUSG00000069310	0.015458	NA
Gm6020	ENSMUSG00000069475	0.015458	NA
Taar3	ENSMUSG00000069708	0.015458	NA
Gm5356	ENSMUSG00000069962	0.015458	NA
Gm4788	ENSMUSG00000070594	0.015458	NA
Sult2a2	ENSMUSG00000070811	0.015458	NA
Gm13288	ENSMUSG00000070908	0.015458	NA
Tex24	ENSMUSG00000071138	0.015458	NA
Gm10334	ENSMUSG00000071517	0.015458	NA
Rhox7	ENSMUSG00000071767	0.015458	NA
Gm10356	ENSMUSG00000072387	0.015458	NA
Rpl21-ps4	ENSMUSG00000072714	0.015458	NA
Gm10408	ENSMUSG00000072739	0.015458	NA
Vmn2r27	ENSMUSG00000072778	0.015458	NA
Fam46d	ENSMUSG00000073007	0.015458	NA
D130052B06Rik	ENSMUSG00000073052	0.015458	NA
Gm10490	ENSMUSG00000073290	0.015458	NA
Gm8909	ENSMUSG00000073402	0.015458	NA
Mxra8os	ENSMUSG00000073679	0.015458	NA
Olfr689	ENSMUSG00000073907	0.015458	NA
Olfr561	ENSMUSG00000073966	0.015458	NA
Olfr554	ENSMUSG00000073971	0.015458	NA
1700026J12Rik	ENSMUSG00000073976	0.015458	NA
Fbxw16	ENSMUSG00000074062	0.015458	NA
Cmtm2a	ENSMUSG00000074127	0.015458	NA
4930579C12Rik	ENSMUSG00000074146	0.015458	NA
Apoc4	ENSMUSG00000074336	0.015458	NA
Gm10701	ENSMUSG00000074465	0.015458	NA
Gm815	ENSMUSG00000074913	0.015458	NA
Gm10787	ENSMUSG00000074919	0.015458	NA
Gm13981	ENSMUSG00000074930	0.015458	NA
Slc22a29	ENSMUSG00000075044	0.015458	NA
Gm6043	ENSMUSG00000075245	0.015458	NA
Krt76	ENSMUSG00000075402	0.015458	NA
B130006D01Rik	ENSMUSG00000075596	0.015458	NA
Trbv5	ENSMUSG00000076465	0.015458	NA
Trbv13-3	ENSMUSG00000076470	0.015458	NA
Igkv2-137	ENSMUSG00000076501	0.015458	NA
Igkv1-88	ENSMUSG00000076535	0.015458	NA
Igkv4-72	ENSMUSG00000076545	0.015458	NA
Igkv8-24	ENSMUSG00000076583	0.015458	NA
Trgv2	ENSMUSG00000076754	0.015458	NA
Tcrg-C4	ENSMUSG00000076757	0.015458	NA
Trav19	ENSMUSG00000076862	0.015458	NA
Trdv5	ENSMUSG00000076873	0.015458	NA
Traj26	ENSMUSG00000076903	0.015458	NA
Iglc2	ENSMUSG00000076937	0.015458	NA
Krtap1-3	ENSMUSG00000078131	0.015458	NA
Gm3940	ENSMUSG00000078291	0.015458	NA
Gm10935	ENSMUSG00000078384	0.015458	NA
Gm12789	ENSMUSG00000078625	0.015458	NA
Mup20	ENSMUSG00000078672	0.015458	NA
Scgb1b30	ENSMUSG00000078752	0.015458	NA
Gm9733	ENSMUSG00000078783	0.015458	NA
Gp6	ENSMUSG00000078810	0.015458	NA
Cpt1b	ENSMUSG00000078937	0.015458	NA
Gm14221	ENSMUSG00000078956	0.015458	NA
1700013D24Rik	ENSMUSG00000079346	0.015458	NA
Gm7325	ENSMUSG00000079471	0.015458	NA
Gm15402	ENSMUSG00000079524	0.015458	NA
Klra1	ENSMUSG00000079853	0.015458	NA
Gm4984	ENSMUSG00000079871	0.015458	NA
Gm11970	ENSMUSG00000079988	0.015458	NA
Gm15981	ENSMUSG00000080700	0.015458	NA
Gm5406	ENSMUSG00000080715	0.015458	NA
Gm15532	ENSMUSG00000080719	0.015458	NA
Gm16077	ENSMUSG00000080720	0.015458	NA
Gm12543	ENSMUSG00000080772	0.015458	NA
Gm7841	ENSMUSG00000080788	0.015458	NA
Gm13310	ENSMUSG00000080801	0.015458	NA
Gm11737	ENSMUSG00000080810	0.015458	NA
Gm13751	ENSMUSG00000080817	0.015458	NA
Gm9434	ENSMUSG00000080818	0.015458	NA
Olfr587-ps1	ENSMUSG00000080891	0.015458	NA
AU015836	ENSMUSG00000081044	0.015458	NA
Gm12846	ENSMUSG00000081046	0.015458	NA
Gm12568	ENSMUSG00000081078	0.015458	NA
Gm13463	ENSMUSG00000081085	0.015458	NA
Gm9506	ENSMUSG00000081086	0.015458	NA
Gm14630	ENSMUSG00000081100	0.015458	NA
Gm12684	ENSMUSG00000081150	0.015458	NA
Gm14425	ENSMUSG00000081156	0.015458	NA
Gm13858	ENSMUSG00000081196	0.015458	NA
Gm6964	ENSMUSG00000081212	0.015458	NA
Gm15836	ENSMUSG00000081238	0.015458	NA
Olfr333-ps1	ENSMUSG00000081287	0.015458	NA
Gm12936	ENSMUSG00000081319	0.015458	NA
Gm15176	ENSMUSG00000081415	0.015458	NA
Gm11830	ENSMUSG00000081490	0.015458	NA
Gm14138	ENSMUSG00000081572	0.015458	NA
Gm12005	ENSMUSG00000081631	0.015458	NA
Gm12317	ENSMUSG00000081690	0.015458	NA
Rps11-ps3	ENSMUSG00000081715	0.015458	NA
Mdm4-ps	ENSMUSG00000081739	0.015458	NA
Gm15152	ENSMUSG00000081782	0.015458	NA
Gm12722	ENSMUSG00000081819	0.015458	NA
Gm15626	ENSMUSG00000081822	0.015458	NA
Cyp4a28-ps	ENSMUSG00000081823	0.015458	NA
Gm15460	ENSMUSG00000081829	0.015458	NA
Gm13444	ENSMUSG00000081841	0.015458	NA
Prkaca-ps1	ENSMUSG00000081845	0.015458	NA
Gm14441	ENSMUSG00000081861	0.015458	NA
Gm14767	ENSMUSG00000081933	0.015458	NA
Gm12193	ENSMUSG00000081934	0.015458	NA
Xlr3e-ps	ENSMUSG00000081940	0.015458	NA
Gm13626	ENSMUSG00000081954	0.015458	NA
Gm11719	ENSMUSG00000081995	0.015458	NA
Gm12271	ENSMUSG00000082032	0.015458	NA
Gm15928	ENSMUSG00000082093	0.015458	NA
Gm11991	ENSMUSG00000082095	0.015458	NA
Gm13541	ENSMUSG00000082132	0.015458	NA
Gm14382	ENSMUSG00000082210	0.015458	NA
Gm15826	ENSMUSG00000082212	0.015458	NA
Gm8503	ENSMUSG00000082244	0.015458	NA
Gm12997	ENSMUSG00000082249	0.015458	NA
Gm14375	ENSMUSG00000082270	0.015458	NA
Ldha-ps	ENSMUSG00000082330	0.015458	NA
Gm12692	ENSMUSG00000082388	0.015458	NA
Gm15480	ENSMUSG00000082395	0.015458	NA
Gm13740	ENSMUSG00000082417	0.015458	NA
Gm11894	ENSMUSG00000082451	0.015458	NA
Gm14336	ENSMUSG00000082543	0.015458	NA
Gm12149	ENSMUSG00000082614	0.015458	NA
Gm12774	ENSMUSG00000082684	0.015458	NA
Olfr990-ps1	ENSMUSG00000082712	0.015458	NA
Gm13024	ENSMUSG00000082758	0.015458	NA
Gm12956	ENSMUSG00000082814	0.015458	NA
Gm7134	ENSMUSG00000082853	0.015458	NA
Gm6480	ENSMUSG00000082894	0.015458	NA
Gm12850	ENSMUSG00000082941	0.015458	NA
Gm11920	ENSMUSG00000082949	0.015458	NA
Gm15056	ENSMUSG00000082976	0.015458	NA
Rpsa-ps11	ENSMUSG00000082978	0.015458	NA
Polr2k-ps	ENSMUSG00000082981	0.015458	NA
Gm14822	ENSMUSG00000083049	0.015458	NA
Gm11980	ENSMUSG00000083075	0.015458	NA
Gm4917	ENSMUSG00000083162	0.015458	NA
Gm14869	ENSMUSG00000083210	0.015458	NA
Hspe1-ps4	ENSMUSG00000083238	0.015458	NA
Gm7108	ENSMUSG00000083253	0.015458	NA
Csnk2a1-ps	ENSMUSG00000083288	0.015458	NA
Gm15665	ENSMUSG00000083420	0.015458	NA
Gm13992	ENSMUSG00000083425	0.015458	NA
Gm13407	ENSMUSG00000083503	0.015458	NA
Gm12842	ENSMUSG00000083507	0.015458	NA
Gm13450	ENSMUSG00000083533	0.015458	NA
Gm13148	ENSMUSG00000083642	0.015458	NA
Gm13357	ENSMUSG00000083650	0.015458	NA
Gm4912	ENSMUSG00000083701	0.015458	NA
Gm12901	ENSMUSG00000083720	0.015458	NA
Rpl23a-ps14	ENSMUSG00000083723	0.015458	NA
Gm15502	ENSMUSG00000083813	0.015458	NA
Gm2199	ENSMUSG00000083829	0.015458	NA
Gm13771	ENSMUSG00000083832	0.015458	NA
Gm13007	ENSMUSG00000083852	0.015458	NA
Gm13719	ENSMUSG00000083864	0.015458	NA
Gm13472	ENSMUSG00000083866	0.015458	NA
Gm13786	ENSMUSG00000083951	0.015458	NA
Gm12179	ENSMUSG00000083954	0.015458	NA
Gm12617	ENSMUSG00000084034	0.015458	NA
Gm9103	ENSMUSG00000084142	0.015458	NA
Gm12380	ENSMUSG00000084148	0.015458	NA
Gm15488	ENSMUSG00000084217	0.015458	NA
Gm5228	ENSMUSG00000084288	0.015458	NA
Gm11950	ENSMUSG00000084310	0.015458	NA
Gm16198	ENSMUSG00000084343	0.015458	NA
Gm15452	ENSMUSG00000084353	0.015458	NA
2610024D14Rik	ENSMUSG00000084362	0.015458	NA
Tmc4-ps	ENSMUSG00000084380	0.015458	NA
Gm14101	ENSMUSG00000084393	0.015458	NA
Gm11510	ENSMUSG00000084411	0.015458	NA
Grip1os2	ENSMUSG00000084764	0.015458	NA
Gm2568	ENSMUSG00000084793	0.015458	NA
Gm14617	ENSMUSG00000084795	0.015458	NA
Gm11463	ENSMUSG00000084816	0.015458	NA
1700108N11Rik	ENSMUSG00000084837	0.015458	NA
Gm16359	ENSMUSG00000084852	0.015458	NA
Gm13954	ENSMUSG00000084870	0.015458	NA
C79798	ENSMUSG00000084908	0.015458	NA
Gm14161	ENSMUSG00000084935	0.015458	NA
Gm16194	ENSMUSG00000084956	0.015458	NA
B430010I23Rik	ENSMUSG00000084960	0.015458	NA
4930579D09Rik	ENSMUSG00000084971	0.015458	NA
Gm11655	ENSMUSG00000084978	0.015458	NA
Gm11789	ENSMUSG00000084983	0.015458	NA
Gm15839	ENSMUSG00000084999	0.015458	NA
Gm13490	ENSMUSG00000085014	0.015458	NA
Pard3bos2	ENSMUSG00000085019	0.015458	NA
Gm11467	ENSMUSG00000085046	0.015458	NA
Gm12711	ENSMUSG00000085090	0.015458	NA
Gm12737	ENSMUSG00000085093	0.015458	NA
4930444E06Rik	ENSMUSG00000085127	0.015458	NA
Gm12927	ENSMUSG00000085203	0.015458	NA
Gm7855	ENSMUSG00000085226	0.015458	NA
Gm15581	ENSMUSG00000085264	0.015458	NA
Gm13316	ENSMUSG00000085281	0.015458	NA
4930430E12Rik	ENSMUSG00000085295	0.015458	NA
Gm12132	ENSMUSG00000085301	0.015458	NA
Gm16305	ENSMUSG00000085361	0.015458	NA
Rapgef4os1	ENSMUSG00000085439	0.015458	NA
Gm15398	ENSMUSG00000085456	0.015458	NA
Gm12272	ENSMUSG00000085459	0.015458	NA
Gm16686	ENSMUSG00000085473	0.015458	NA
Gm12162	ENSMUSG00000085476	0.015458	NA
4930557F10Rik	ENSMUSG00000085488	0.015458	NA
4930527E20Rik	ENSMUSG00000085491	0.015458	NA
Gm14055	ENSMUSG00000085504	0.015458	NA
Bcas3os2	ENSMUSG00000085514	0.015458	NA
Gm12602	ENSMUSG00000085569	0.015458	NA
Gm13053	ENSMUSG00000085574	0.015458	NA
Gm16321	ENSMUSG00000085592	0.015458	NA
Gm13173	ENSMUSG00000085648	0.015458	NA
4933424L21Rik	ENSMUSG00000085719	0.015458	NA
Gm13096	ENSMUSG00000085724	0.015458	NA
Gm14339	ENSMUSG00000085728	0.015458	NA
8430419K02Rik	ENSMUSG00000085743	0.015458	NA
Gm14009	ENSMUSG00000085750	0.015458	NA
A530010F05Rik	ENSMUSG00000085797	0.015458	NA
Gm15338	ENSMUSG00000085899	0.015458	NA
Gm12951	ENSMUSG00000085920	0.015458	NA
Gm12648	ENSMUSG00000085931	0.015458	NA
Gm13448	ENSMUSG00000086001	0.015458	NA
Gm15318	ENSMUSG00000086010	0.015458	NA
4930423M02Rik	ENSMUSG00000086066	0.015458	NA
Gm14707	ENSMUSG00000086104	0.015458	NA
Gm12718	ENSMUSG00000086136	0.015458	NA
Gm6425	ENSMUSG00000086174	0.015458	NA
Gm7546	ENSMUSG00000086232	0.015458	NA
Gm12724	ENSMUSG00000086249	0.015458	NA
Gm12979	ENSMUSG00000086336	0.015458	NA
Gm11535	ENSMUSG00000086337	0.015458	NA
1700017J07Rik	ENSMUSG00000086348	0.015458	NA
4930529C04Rik	ENSMUSG00000086377	0.015458	NA
AV064505	ENSMUSG00000086381	0.015458	NA
1700042O10Rik	ENSMUSG00000086391	0.015458	NA
Gm16158	ENSMUSG00000086410	0.015458	NA
Gm11364	ENSMUSG00000086423	0.015458	NA
Rsf1os1	ENSMUSG00000086433	0.015458	NA
Asb17os	ENSMUSG00000086438	0.015458	NA
Gm13990	ENSMUSG00000086462	0.015458	NA
Gm15875	ENSMUSG00000086500	0.015458	NA
Gm16058	ENSMUSG00000086505	0.015458	NA
Gm15384	ENSMUSG00000086573	0.015458	NA
Btbd18	ENSMUSG00000086598	0.015458	NA
Rspo4os	ENSMUSG00000086620	0.015458	NA
Gm12949	ENSMUSG00000086636	0.015458	NA
Gm12249	ENSMUSG00000086666	0.015458	NA
Gm14280	ENSMUSG00000086831	0.015458	NA
Gm13748	ENSMUSG00000086836	0.015458	NA
Gm13840	ENSMUSG00000086849	0.015458	NA
Gm16080	ENSMUSG00000086856	0.015458	NA
Gm12828	ENSMUSG00000086876	0.015458	NA
Frs3os	ENSMUSG00000086930	0.015458	NA
Gm15941	ENSMUSG00000086992	0.015458	NA
Gm15979	ENSMUSG00000087016	0.015458	NA
Gm13874	ENSMUSG00000087032	0.015458	NA
4930432L08Rik	ENSMUSG00000087037	0.015458	NA
Gm12301	ENSMUSG00000087058	0.015458	NA
Trp73os	ENSMUSG00000087071	0.015458	NA
Gm11714	ENSMUSG00000087113	0.015458	NA
Gm12665	ENSMUSG00000087145	0.015458	NA
Gm14228	ENSMUSG00000087147	0.015458	NA
Gm6927	ENSMUSG00000087152	0.015458	NA
Sox5os2	ENSMUSG00000087157	0.015458	NA
Gm16336	ENSMUSG00000087160	0.015458	NA
Gm14820	ENSMUSG00000087193	0.015458	NA
Gm13780	ENSMUSG00000087197	0.015458	NA
Gm13097	ENSMUSG00000087198	0.015458	NA
Gm14618	ENSMUSG00000087215	0.015458	NA
Gm15461	ENSMUSG00000087258	0.015458	NA
Gm15409	ENSMUSG00000087272	0.015458	NA
A930006I01Rik	ENSMUSG00000087278	0.015458	NA
Gm15907	ENSMUSG00000087319	0.015458	NA
Ctcflos	ENSMUSG00000087382	0.015458	NA
Gm12945	ENSMUSG00000087394	0.015458	NA
Gm16048	ENSMUSG00000087411	0.015458	NA
Gm14453	ENSMUSG00000087442	0.015458	NA
Gm12971	ENSMUSG00000087449	0.015458	NA
Gm11998	ENSMUSG00000087452	0.015458	NA
Gm13905	ENSMUSG00000087465	0.015458	NA
Gm15656	ENSMUSG00000087489	0.015458	NA
Gm15241	ENSMUSG00000087505	0.015458	NA
Gm16141	ENSMUSG00000087507	0.015458	NA
Gm13062	ENSMUSG00000087525	0.015458	NA
Gm11608	ENSMUSG00000087561	0.015458	NA
Gm16174	ENSMUSG00000087593	0.015458	NA
Gm11773	ENSMUSG00000087638	0.015458	NA
Gm11373	ENSMUSG00000087662	0.015458	NA
Gm11712	ENSMUSG00000087683	0.015458	NA
Gm16228	ENSMUSG00000089627	0.015458	NA
Gm4778	ENSMUSG00000089696	0.015458	NA
Clec2f	ENSMUSG00000089728	0.015458	NA
Gm3513	ENSMUSG00000089746	0.015458	NA
Gm15684	ENSMUSG00000089776	0.015458	NA
Gm3355	ENSMUSG00000089883	0.015458	NA
Gm7568	ENSMUSG00000089982	0.015458	NA
Gm16125	ENSMUSG00000090004	0.015458	NA
Gm16555	ENSMUSG00000090012	0.015458	NA
Gm15900	ENSMUSG00000090036	0.015458	NA
Gm15872	ENSMUSG00000090080	0.015458	NA
Gm16094	ENSMUSG00000090103	0.015458	NA
Gm11492	ENSMUSG00000090107	0.015458	NA
1700025N21Rik	ENSMUSG00000090200	0.015458	NA
Gm15851	ENSMUSG00000090208	0.015458	NA
Vmn2r-ps3	ENSMUSG00000090303	0.015458	NA
Adh6-ps1	ENSMUSG00000090306	0.015458	NA
Gm9732	ENSMUSG00000090440	0.015458	NA
Gm2840	ENSMUSG00000090468	0.015458	NA
Gm8893	ENSMUSG00000090555	0.015458	NA
Gm17060	ENSMUSG00000090624	0.015458	NA
Traj60	ENSMUSG00000090782	0.015458	NA
Gm3141	ENSMUSG00000090796	0.015458	NA
F830016B08Rik	ENSMUSG00000090942	0.015458	NA
Gm7502	ENSMUSG00000091019	0.015458	NA
Vmn2r55	ENSMUSG00000091045	0.015458	NA
Gm9742	ENSMUSG00000091053	0.015458	NA
Iqcf6	ENSMUSG00000091129	0.015458	NA
4921509A06Rik	ENSMUSG00000091147	0.015458	NA
Vmn2r83	ENSMUSG00000091381	0.015458	NA
Gm17450	ENSMUSG00000091419	0.015458	NA
Gm17337	ENSMUSG00000091430	0.015458	NA
Gm6586	ENSMUSG00000091487	0.015458	NA
Triml2	ENSMUSG00000091490	0.015458	NA
Gm6211	ENSMUSG00000091577	0.015458	NA
Gm17033	ENSMUSG00000091583	0.015458	NA
Gm9364	ENSMUSG00000091611	0.015458	NA
Eif3s6-ps2	ENSMUSG00000091697	0.015458	NA
Gm6526	ENSMUSG00000091698	0.015458	NA
Gm3095	ENSMUSG00000091756	0.015458	NA
Vmn2r18	ENSMUSG00000091794	0.015458	NA
B930036N10Rik	ENSMUSG00000091993	0.015458	NA
Gm6611	ENSMUSG00000091997	0.015458	NA
Gm17072	ENSMUSG00000091998	0.015458	NA
Gm4782	ENSMUSG00000092012	0.015458	NA
1700121N20Rik	ENSMUSG00000092066	0.015458	NA
Gm5624	ENSMUSG00000092165	0.015458	NA
Gm6004	ENSMUSG00000092238	0.015458	NA
Gm20467	ENSMUSG00000092250	0.015458	NA
1700116B05Rik	ENSMUSG00000092276	0.015458	NA
Prps1l1	ENSMUSG00000092305	0.015458	NA
Gm20428	ENSMUSG00000092553	0.015458	NA
Gm20689	ENSMUSG00000093384	0.015458	NA
Gm20638	ENSMUSG00000093410	0.015458	NA
Gm20657	ENSMUSG00000093484	0.015458	NA
Gm20654	ENSMUSG00000093626	0.015458	NA
Gm20616	ENSMUSG00000093628	0.015458	NA
Gm20631	ENSMUSG00000093650	0.015458	NA
Olfr462	ENSMUSG00000093839	0.015458	NA
S100a2	ENSMUSG00000094018	0.015458	NA
Vmn2r44	ENSMUSG00000094098	0.015458	NA
Sult2a7	ENSMUSG00000094156	0.015458	NA
Gm21759	ENSMUSG00000094226	0.015458	NA
Gm933	ENSMUSG00000094430	0.015458	NA
Gm3055	ENSMUSG00000094622	0.015458	NA
Olfr857	ENSMUSG00000094678	0.015458	NA
Gm1647	ENSMUSG00000094763	0.015458	NA
Gm21103	ENSMUSG00000094811	0.015458	NA
Topaz1	ENSMUSG00000094985	0.015458	NA
E030018B13Rik	ENSMUSG00000095061	0.015458	NA
Gm20069	ENSMUSG00000095174	0.015458	NA
Gm6100	ENSMUSG00000095202	0.015458	NA
Gm8024	ENSMUSG00000095318	0.015458	NA
Gm18025	ENSMUSG00000095406	0.015458	NA
Trav7n-6	ENSMUSG00000095415	0.015458	NA
Gm21817	ENSMUSG00000095651	0.015458	NA
Olfr209	ENSMUSG00000095706	0.015458	NA
Tdgf1-ps1	ENSMUSG00000095834	0.015458	NA
Gm13237	ENSMUSG00000095865	0.015458	NA
Gm19961	ENSMUSG00000095905	0.015458	NA
Gm17048	ENSMUSG00000095991	0.015458	NA
Gm3898	ENSMUSG00000096322	0.015458	NA
Igkv1-135	ENSMUSG00000096336	0.015458	NA
Gm6408	ENSMUSG00000096344	0.015458	NA
Trav9-4	ENSMUSG00000096678	0.015458	NA
Mrgpra2b	ENSMUSG00000096719	0.015458	NA
Gm3460	ENSMUSG00000096839	0.015458	NA
Gm16531	ENSMUSG00000097012	0.015458	NA
Gm26663	ENSMUSG00000097019	0.015458	NA
Gm26743	ENSMUSG00000097067	0.015458	NA
Gm26626	ENSMUSG00000097139	0.015458	NA
Gm26769	ENSMUSG00000097256	0.015458	NA
Gm26568	ENSMUSG00000097315	0.015458	NA
Gm26719	ENSMUSG00000097364	0.015458	NA
Gm26874	ENSMUSG00000097374	0.015458	NA
Gm26556	ENSMUSG00000097396	0.015458	NA
Gm26904	ENSMUSG00000097560	0.015458	NA
4930471M09Rik	ENSMUSG00000097693	0.015458	NA
D030040B21Rik	ENSMUSG00000097744	0.015458	NA
Gm26636	ENSMUSG00000097763	0.015458	NA
G730046D07Rik	ENSMUSG00000097810	0.015458	NA
Gm7784	ENSMUSG00000097920	0.015458	NA
C330002G04Rik	ENSMUSG00000097930	0.015458	NA
Gm21430	ENSMUSG00000097948	0.015458	NA
Gm5354	ENSMUSG00000097949	0.015458	NA
Gm27019	ENSMUSG00000097998	0.015458	NA
Gm27026	ENSMUSG00000098000	0.015458	NA
Gm9211	ENSMUSG00000098016	0.015458	NA
Gm6771	ENSMUSG00000098030	0.015458	NA
Gm26925	ENSMUSG00000098039	0.015458	NA
Gm26942	ENSMUSG00000098069	0.015458	NA
Gm20574	ENSMUSG00000098082	0.015458	NA
Gm27006	ENSMUSG00000098101	0.015458	NA
9530085P06Rik	ENSMUSG00000098109	0.015458	NA
Gm4665	ENSMUSG00000098127	0.015458	NA
Gm9081	ENSMUSG00000098138	0.015458	NA
Gm26962	ENSMUSG00000098191	0.015458	NA
Gm7734	ENSMUSG00000098236	0.015458	NA
Hm629797	ENSMUSG00000098439	0.015458	NA
Gm27216	ENSMUSG00000098747	0.015458	NA
Gm18853	ENSMUSG00000098934	0.015458	NA
Gm27229	ENSMUSG00000099055	0.015458	NA
0610031O16Rik	ENSMUSG00000099146	0.015458	NA
CAAA01152789.1	ENSMUSG00000099364	0.015458	NA
RP23-435I22.4	ENSMUSG00000099373	0.015458	NA
RP23-395C1.4	ENSMUSG00000099472	0.015458	NA
RP24-404O8.1	ENSMUSG00000099561	0.015458	NA
RP23-305F24.3	ENSMUSG00000099576	0.015458	NA
RP23-201B13.1	ENSMUSG00000099629	0.015458	NA
RP23-216J17.1	ENSMUSG00000099765	0.015458	NA
RP23-89M16.4	ENSMUSG00000099810	0.015458	NA
RP23-434L2.1	ENSMUSG00000099868	0.015458	NA
RP23-471L1.5	ENSMUSG00000099954	0.015458	NA
RP23-45A13.6	ENSMUSG00000100021	0.015458	NA
RP23-315J23.3	ENSMUSG00000100169	0.015458	NA
RP24-119I6.5	ENSMUSG00000100204	0.015458	NA
RP24-91H16.1	ENSMUSG00000100231	0.015458	NA
RP23-466C15.3	ENSMUSG00000100269	0.015458	NA
RP23-402F16.1	ENSMUSG00000100315	0.015458	NA
RP24-345A14.5	ENSMUSG00000100382	0.015458	NA
RP23-128A11.6	ENSMUSG00000100383	0.015458	NA
RP23-237L7.1	ENSMUSG00000100397	0.015458	NA
RP24-392J14.2	ENSMUSG00000100444	0.015458	NA
RP23-131D6.2	ENSMUSG00000100543	0.015458	NA
RP23-18J12.5	ENSMUSG00000100585	0.015458	NA
RP24-303N12.1	ENSMUSG00000100603	0.015458	NA
RP23-28J6.1	ENSMUSG00000100625	0.015458	NA
RP23-122O4.1	ENSMUSG00000100671	0.015458	NA
RP23-170A19.1	ENSMUSG00000100733	0.015458	NA
RP23-230O9.11	ENSMUSG00000100880	0.015458	NA
RP23-21N15.4	ENSMUSG00000100932	0.015458	NA
RP24-406F14.2	ENSMUSG00000100935	0.015458	NA
RP23-125I14.6	ENSMUSG00000101171	0.015458	NA
RP23-145H3.1	ENSMUSG00000101217	0.015458	NA
RP23-76C10.2	ENSMUSG00000101262	0.015458	NA
RP23-329D23.4	ENSMUSG00000101268	0.015458	NA
RP24-331H14.2	ENSMUSG00000101309	0.015458	NA
RP23-337B16.2	ENSMUSG00000101371	0.015458	NA
Pced1c-ps	ENSMUSG00000101387	0.015458	NA
Gm10830	ENSMUSG00000101588	0.015458	NA
RP24-286D13.6	ENSMUSG00000101625	0.015458	NA
RP24-497L5.5	ENSMUSG00000101639	0.015458	NA
RP23-397C14.2	ENSMUSG00000101660	0.015458	NA
RP23-139L20.1	ENSMUSG00000101741	0.015458	NA
Olfr1392	ENSMUSG00000101750	0.015458	NA
RP23-315J23.1	ENSMUSG00000101847	0.015458	NA
RP24-141B16.1	ENSMUSG00000101869	0.015458	NA
RP23-281C18.21	ENSMUSG00000101925	0.015458	NA
RP23-238L21.5	ENSMUSG00000101936	0.015458	NA
RP23-185P17.1	ENSMUSG00000102036	0.015458	NA
RP24-88F2.1	ENSMUSG00000102067	0.015458	NA
RP24-446E18.2	ENSMUSG00000102119	0.015458	NA
Ankrd60	ENSMUSG00000027517	0.015467	NA
Gm9725	ENSMUSG00000037982	0.015467	NA
Klf17	ENSMUSG00000048626	0.015467	NA
Gm14016	ENSMUSG00000080747	0.015467	NA
F11	ENSMUSG00000031645	0.015468	NA
Rpl10-ps2	ENSMUSG00000074108	0.015468	NA
Trbv29	ENSMUSG00000076480	0.015468	NA
Trbc1	ENSMUSG00000076490	0.015468	NA
4930507D10Rik	ENSMUSG00000086703	0.015468	NA
Gm10390	ENSMUSG00000097368	0.015468	NA
Plk4	ENSMUSG00000025758	0.015484	0.95744
Adig	ENSMUSG00000044405	0.015487	NA
Gm12977	ENSMUSG00000085009	0.015487	NA
Gm20403	ENSMUSG00000092233	0.015487	NA
RP24-421J9.4	ENSMUSG00000100180	0.015487	NA
Rheb	ENSMUSG00000028945	0.015494	0.91411
Tmem171	ENSMUSG00000052485	0.01551	0.96969
Hic2	ENSMUSG00000050240	0.01552	0.95804
Gm15348	ENSMUSG00000074469	0.01552	NA
Gm13584	ENSMUSG00000087539	0.015532	NA
RP23-421N20.3	ENSMUSG00000102062	0.015541	NA
Slc7a9	ENSMUSG00000030492	0.015577	NA
Tssk5	ENSMUSG00000060794	0.015578	NA
Gm16072	ENSMUSG00000082051	0.015578	NA
Gm11771	ENSMUSG00000083618	0.015578	NA
4931413K12Rik	ENSMUSG00000085088	0.015578	NA
Sspnos	ENSMUSG00000085414	0.015578	NA
Pdcd1lg2	ENSMUSG00000016498	0.015579	NA
Gm11533	ENSMUSG00000081860	0.0156	NA
Gm13055	ENSMUSG00000085774	0.0156	NA
Gm15334	ENSMUSG00000086991	0.0156	NA
Adam30	ENSMUSG00000043468	0.015642	NA
Gm15186	ENSMUSG00000083906	0.015642	NA
1700049E15Rik	ENSMUSG00000085077	0.015642	NA
Foxn4	ENSMUSG00000042002	0.015665	NA
Ulbp1	ENSMUSG00000079685	0.015665	NA
Gm26523	ENSMUSG00000096984	0.015665	NA
RP23-223I5.2	ENSMUSG00000101214	0.015665	NA
RP24-388H6.2	ENSMUSG00000100120	0.01567	NA
Nup62	ENSMUSG00000043858	0.015709	0.94371
2610035D17Rik	ENSMUSG00000087259	0.015767	0.9539
Sowahd	ENSMUSG00000044400	0.015775	NA
Gm16412	ENSMUSG00000084060	0.015775	NA
Gm12506	ENSMUSG00000085375	0.015775	NA
Gm11716	ENSMUSG00000086298	0.015775	NA
Acss2os	ENSMUSG00000086529	0.015795	NA
Osbpl9	ENSMUSG00000028559	0.015796	0.93514
Ufm1	ENSMUSG00000027746	0.0158	0.8833
Gm13262	ENSMUSG00000075534	0.015805	NA
Gm13410	ENSMUSG00000083116	0.015805	NA
Gm14592	ENSMUSG00000083738	0.015805	NA
1810046K07Rik	ENSMUSG00000036027	0.015864	NA
Spaca3	ENSMUSG00000053184	0.015864	NA
C630028M04Rik	ENSMUSG00000085515	0.015864	NA
Chid1	ENSMUSG00000025512	0.015867	0.92402
Gm12281	ENSMUSG00000081852	0.015869	NA
Gm17092	ENSMUSG00000091623	0.015869	NA
Agpat3	ENSMUSG00000001211	0.015875	0.88997
RP24-162O23.1	ENSMUSG00000099384	0.015881	NA
RP23-223M20.1	ENSMUSG00000100552	0.015881	NA
Nprl3	ENSMUSG00000020289	0.015927	0.93553
Kank4os	ENSMUSG00000085843	0.015943	NA
Gm14409	ENSMUSG00000078869	0.015953	NA
1200007C13Rik	ENSMUSG00000087684	0.015953	NA
4930428N03Rik	ENSMUSG00000089887	0.015953	NA
Fth-ps2	ENSMUSG00000091313	0.015953	NA
Gm12302	ENSMUSG00000097886	0.015953	NA
Yipf7	ENSMUSG00000029158	0.015977	NA
4930465M20Rik	ENSMUSG00000085641	0.015977	NA
Trmt6	ENSMUSG00000037376	0.016006	0.94086
Pgk1	ENSMUSG00000062070	0.016007	0.9164
Olfr527	ENSMUSG00000062782	0.016015	NA
Gorasp1	ENSMUSG00000032513	0.01605	0.9248
Kcnn1	ENSMUSG00000002908	0.016084	0.94793
Akt2-ps	ENSMUSG00000084347	0.016095	0.96976
Ugp2	ENSMUSG00000001891	0.016098	0.91132
Rpl22-ps1	ENSMUSG00000080877	0.016101	NA
Sgpp1	ENSMUSG00000021054	0.016115	0.94793
Cgnl1	ENSMUSG00000032232	0.016118	0.96969
Sycp1	ENSMUSG00000027855	0.016131	NA
Cfhr2	ENSMUSG00000033898	0.016131	NA
Gm11931	ENSMUSG00000082851	0.016145	NA
RP23-118J13.2	ENSMUSG00000100060	0.016145	NA
2006-09-01	ENSMUSG00000050379	0.016172	0.94048
Gm6685	ENSMUSG00000032889	0.016174	NA
Mrgprb1	ENSMUSG00000070547	0.016219	NA
Gm11416	ENSMUSG00000082027	0.016219	NA
Gm7241	ENSMUSG00000089808	0.016219	NA
Gm20658	ENSMUSG00000093765	0.016219	NA
Ttc17	ENSMUSG00000027194	0.016246	0.88471
Gm4767	ENSMUSG00000094076	0.01628	NA
Gm12197	ENSMUSG00000081311	0.016343	NA
RP23-362B7.1	ENSMUSG00000099474	0.016343	NA
Shisa9	ENSMUSG00000022494	0.016349	0.94047
Ptger2	ENSMUSG00000037759	0.016353	0.97003
Bnip2	ENSMUSG00000011958	0.016378	0.93529
Cyp2b13	ENSMUSG00000040583	0.016408	NA
Trdv1	ENSMUSG00000076864	0.016408	NA
Ppfibp1	ENSMUSG00000016487	0.016422	0.95915
Emc7	ENSMUSG00000055943	0.01643	0.88109
Gm15565	ENSMUSG00000082356	0.016433	NA
Gm16984	ENSMUSG00000085962	0.016439	NA
Gm17258	ENSMUSG00000094108	0.016462	NA
2010110K18Rik	ENSMUSG00000097755	0.016493	NA
Cdhr5	ENSMUSG00000025497	0.016537	NA
Gm16537	ENSMUSG00000089671	0.016538	NA
Asb14	ENSMUSG00000021898	0.016567	0.96969
Capn13	ENSMUSG00000043705	0.016603	NA
Ptpn22	ENSMUSG00000027843	0.016616	0.96969
Gm14262	ENSMUSG00000086783	0.016625	NA
Aipl1	ENSMUSG00000040554	0.016697	NA
Atrip	ENSMUSG00000025646	0.016715	0.94584
Gbp7	ENSMUSG00000040253	0.016809	0.96693
Psmd2	ENSMUSG00000006998	0.016817	0.89366
Gm12300	ENSMUSG00000085348	0.016916	NA
Rad17	ENSMUSG00000021635	0.016932	0.91958
Gm7599	ENSMUSG00000083332	0.016963	NA
Mtap7d3	ENSMUSG00000067878	0.016965	NA
Gm26836	ENSMUSG00000097051	0.016999	NA
Gm5558	ENSMUSG00000096726	0.017004	NA
Mrps14	ENSMUSG00000058267	0.017013	0.94516
Nacc1	ENSMUSG00000001910	0.017045	0.93236
Actr10	ENSMUSG00000021076	0.017054	0.88363
Crem	ENSMUSG00000063889	0.017064	0.93487
Mtmr10	ENSMUSG00000030522	0.017066	0.93491
Dhrs2	ENSMUSG00000022209	0.017105	NA
Zfpl1	ENSMUSG00000024792	0.01711	0.95595
E230013L22Rik	ENSMUSG00000096957	0.017118	NA
Nadk2	ENSMUSG00000022253	0.017121	0.95394
Gm12496	ENSMUSG00000086267	0.017281	NA
Cebpg	ENSMUSG00000056216	0.017293	0.9282
Otog	ENSMUSG00000009487	0.017301	NA
Inip	ENSMUSG00000038544	0.017305	0.9164
Rbms1	ENSMUSG00000026970	0.017346	0.95826
Bfar	ENSMUSG00000022684	0.017441	0.91564
Gm14121	ENSMUSG00000083325	0.017445	0.96845
Abhd5	ENSMUSG00000032540	0.017459	0.94838
RP23-103C13.2	ENSMUSG00000100635	0.017464	NA
Gm11185	ENSMUSG00000083245	0.017501	NA
Gm8624	ENSMUSG00000083705	0.017536	NA
Ambra1	ENSMUSG00000040506	0.017541	0.92174
H3f3a	ENSMUSG00000060743	0.017541	0.88814
Prok1	ENSMUSG00000070368	0.01756	NA
Gsta1	ENSMUSG00000074183	0.01756	NA
Rhbdd2	ENSMUSG00000039917	0.017578	0.92602
Vgll3	ENSMUSG00000091243	0.017593	0.96835
Spns1	ENSMUSG00000030741	0.017597	0.95123
Jam3	ENSMUSG00000031990	0.017611	0.91134
Atg9b	ENSMUSG00000038295	0.017624	0.9539
Dph6	ENSMUSG00000057147	0.017655	0.9296
Amot	ENSMUSG00000041688	0.017666	0.94453
Chrnb1	ENSMUSG00000041189	0.01767	0.9613
Tlx2	ENSMUSG00000068327	0.01774	NA
Ptpn7	ENSMUSG00000031506	0.017759	NA
Msantd3	ENSMUSG00000039693	0.017858	0.92402
Edn2	ENSMUSG00000028635	0.017862	NA
Sst	ENSMUSG00000004366	0.017881	0.96173
Trmt5	ENSMUSG00000034442	0.017933	0.93248
Ptrh2	ENSMUSG00000072582	0.017933	0.91242
Anks1	ENSMUSG00000024219	0.017935	0.90778
Aatk	ENSMUSG00000025375	0.017973	0.91858
Ccdc71	ENSMUSG00000049305	0.018014	0.92568
Nufip1	ENSMUSG00000022009	0.018024	0.92352
Ino80	ENSMUSG00000034154	0.018039	0.9194
Atp6ap1	ENSMUSG00000019087	0.018052	0.89227
Foxl2	ENSMUSG00000050397	0.018086	0.96318
Irx3os	ENSMUSG00000046413	0.018107	NA
Gm10233	ENSMUSG00000068165	0.01811	NA
Mrgprf	ENSMUSG00000031070	0.018143	0.96658
Gbp9	ENSMUSG00000029298	0.018172	0.96711
Gm15994	ENSMUSG00000082183	0.018216	NA
Dcbld1	ENSMUSG00000019891	0.018224	0.92753
Gm13373	ENSMUSG00000087196	0.018237	0.962
Scpep1os	ENSMUSG00000087338	0.018237	NA
Dennd6b	ENSMUSG00000015377	0.018258	0.94492
Srsf3	ENSMUSG00000071172	0.01826	0.88837
Clic4	ENSMUSG00000037242	0.018279	0.94838
Rdh11	ENSMUSG00000066441	0.018291	0.90944
Nqo2	ENSMUSG00000046949	0.018325	0.94028
Drg2	ENSMUSG00000020537	0.018351	0.94428
Pla2g6	ENSMUSG00000042632	0.018359	0.95115
Ankmy2	ENSMUSG00000036188	0.018381	0.9103
Camkk1	ENSMUSG00000020785	0.018398	0.92753
Rab40b	ENSMUSG00000025170	0.018399	0.93798
Adcy7	ENSMUSG00000031659	0.018401	0.95445
Cdk6	ENSMUSG00000040274	0.018413	NA
Bag2	ENSMUSG00000042215	0.018429	0.92052
Med6	ENSMUSG00000002679	0.018464	0.91564
Slc16a6	ENSMUSG00000041920	0.018475	0.95678
Eef1g	ENSMUSG00000071644	0.018498	0.93822
Gm26613	ENSMUSG00000097020	0.01854	NA
Tgm2	ENSMUSG00000037820	0.018542	0.93419
Zscan29	ENSMUSG00000050619	0.018543	0.93155
D130007C19Rik	ENSMUSG00000054304	0.018598	NA
Gm15326	ENSMUSG00000086111	0.018646	NA
Abcc6	ENSMUSG00000030834	0.018654	0.96361
Gm20109	ENSMUSG00000097714	0.018672	NA
Wdr72	ENSMUSG00000044976	0.018681	0.94177
RP23-298I7.4	ENSMUSG00000099610	0.01869	NA
Rab31	ENSMUSG00000056515	0.018708	0.91241
Slc9a8	ENSMUSG00000039463	0.018739	0.90877
Mrpl3	ENSMUSG00000032563	0.01874	0.8498
1500004A13Rik	ENSMUSG00000098912	0.018791	0.89589
H2-Pa	ENSMUSG00000098241	0.018793	NA
Sun3	ENSMUSG00000040985	0.018797	NA
Ces1a	ENSMUSG00000071047	0.018865	NA
Aptx	ENSMUSG00000028411	0.018941	0.90745
Krcc1	ENSMUSG00000053012	0.018942	0.94086
Mrpl21	ENSMUSG00000024829	0.019001	0.93997
1700066B19Rik	ENSMUSG00000073598	0.019007	NA
Ywhaz	ENSMUSG00000022285	0.019121	0.92753
Stk16	ENSMUSG00000026201	0.019148	0.93953
Itgb3bp	ENSMUSG00000028549	0.019155	0.93982
Ilf3	ENSMUSG00000032178	0.019166	0.86827
Irf6	ENSMUSG00000026638	0.019172	0.96337
Kif6	ENSMUSG00000023999	0.019188	0.95675
Gm13398	ENSMUSG00000087364	0.019188	NA
Tmcc2	ENSMUSG00000042066	0.019196	0.93216
Tesk1	ENSMUSG00000028458	0.019206	0.94968
Slc5a4b	ENSMUSG00000020226	0.019238	NA
St6galnac1	ENSMUSG00000009588	0.019256	NA
Nckap1l	ENSMUSG00000022488	0.019304	0.92283
AW551984	ENSMUSG00000038112	0.019306	0.95678
Chac2	ENSMUSG00000020309	0.019353	0.93287
Pak1ip1	ENSMUSG00000038683	0.019354	0.8802
Fpr2	ENSMUSG00000052270	0.019432	NA
Gm15624	ENSMUSG00000085782	0.019468	0.95804
Usp21	ENSMUSG00000053483	0.019472	0.92812
Ctse	ENSMUSG00000004552	0.01954	NA
Gm13429	ENSMUSG00000085141	0.019544	NA
D430019H16Rik	ENSMUSG00000094910	0.019554	0.92288
Slain1os	ENSMUSG00000089707	0.019555	NA
Rnf34	ENSMUSG00000029474	0.019566	0.88639
Cd8a	ENSMUSG00000053977	0.019573	NA
Cideb	ENSMUSG00000022219	0.019599	0.96379
Gm16581	ENSMUSG00000089670	0.019616	NA
Dpysl2	ENSMUSG00000022048	0.019623	0.94838
Aldh1l1	ENSMUSG00000030088	0.019643	0.94423
Csrp2bp	ENSMUSG00000027425	0.019647	0.91798
Ahdc1	ENSMUSG00000037692	0.019678	0.94641
Notch4	ENSMUSG00000015468	0.019686	0.94584
Gm16047	ENSMUSG00000084882	0.019692	0.96418
Tpcn1	ENSMUSG00000032741	0.019774	0.91651
2210008F06Rik	ENSMUSG00000097165	0.019816	0.95448
Gm8615	ENSMUSG00000024437	0.019821	NA
Ttc25	ENSMUSG00000006784	0.019849	0.9613
1600002K03Rik	ENSMUSG00000035595	0.019866	0.95804
Gm15931	ENSMUSG00000081723	0.019929	NA
Fam214b	ENSMUSG00000036002	0.019952	0.9036
Ola1	ENSMUSG00000027108	0.019982	0.87384
4933402D24Rik	ENSMUSG00000025961	0.020035	0.96379
Cxxc5	ENSMUSG00000046668	0.020065	0.88246
Rrp1b	ENSMUSG00000058392	0.020114	0.94177
Gm2566	ENSMUSG00000082959	0.020122	NA
Mageh1	ENSMUSG00000047238	0.020148	0.89931
Psd4	ENSMUSG00000026979	0.020151	0.95421
Ctnna1	ENSMUSG00000037815	0.020158	0.92402
Mboat4	ENSMUSG00000071113	0.020166	NA
Tmco5b	ENSMUSG00000041255	0.020298	NA
Gm6712	ENSMUSG00000072761	0.020325	0.95592
Lepr	ENSMUSG00000057722	0.020349	0.95687
Acot5	ENSMUSG00000042540	0.020369	0.9329
Kif5a	ENSMUSG00000074657	0.020406	0.94265
1700055N04Rik	ENSMUSG00000037263	0.020462	NA
Adam7	ENSMUSG00000022056	0.020515	NA
Vsig1	ENSMUSG00000031430	0.020551	NA
Pp2d1	ENSMUSG00000044957	0.020588	NA
Polr1e	ENSMUSG00000028318	0.020642	0.93298
Dlk2	ENSMUSG00000047428	0.020667	0.95183
Tph2	ENSMUSG00000006764	0.020709	0.95678
Gpld1	ENSMUSG00000021340	0.020712	0.87539
9930038B18Rik	ENSMUSG00000042976	0.020769	NA
Dazap1	ENSMUSG00000069565	0.020779	0.92841
Ttc9	ENSMUSG00000042734	0.020782	0.94317
Cript	ENSMUSG00000024146	0.020785	0.91637
Ube2d1	ENSMUSG00000019927	0.020811	0.89956
Card9	ENSMUSG00000026928	0.020827	0.94423
Fntb	ENSMUSG00000033373	0.020864	0.91183
Gm6206	ENSMUSG00000048949	0.020873	0.95558
Gm15690	ENSMUSG00000086165	0.020914	NA
Slc30a5	ENSMUSG00000021629	0.020922	0.91603
Gm26862	ENSMUSG00000097644	0.020945	NA
Gm4952	ENSMUSG00000071633	0.020947	NA
Col8a1	ENSMUSG00000068196	0.020959	0.9451
Zfp872	ENSMUSG00000074472	0.020967	NA
Papln	ENSMUSG00000021223	0.020993	0.96191
Rsf1os2	ENSMUSG00000086993	0.02103	NA
Gm15728	ENSMUSG00000086075	0.021075	0.93529
Tor3a	ENSMUSG00000060519	0.021077	0.93256
Sgsh	ENSMUSG00000005043	0.021084	0.90997
Laptm4b	ENSMUSG00000022257	0.021087	0.91099
Tle3	ENSMUSG00000032280	0.021106	0.9282
Tmem88b	ENSMUSG00000073680	0.021118	0.94372
Gm13028	ENSMUSG00000087628	0.021158	0.96147
Mfge8	ENSMUSG00000030605	0.021188	0.95115
C230088H06Rik	ENSMUSG00000097168	0.021197	NA
Cux2	ENSMUSG00000042589	0.021219	0.94219
Tesc	ENSMUSG00000029359	0.021236	0.9539
Gm10125	ENSMUSG00000063087	0.021279	0.93057
Gsg1	ENSMUSG00000030206	0.021322	0.9613
Cic	ENSMUSG00000005442	0.021405	0.92753
Zfp558	ENSMUSG00000074500	0.021435	0.95883
Pacrgl	ENSMUSG00000029089	0.021462	0.9156
Rpl17-ps4	ENSMUSG00000084345	0.021487	NA
Gtf2ird2	ENSMUSG00000015942	0.021493	0.90942
Nme1	ENSMUSG00000037601	0.021519	0.94838
Glis2	ENSMUSG00000014303	0.021539	0.90834
Paip2	ENSMUSG00000037058	0.021568	0.88516
Sox18	ENSMUSG00000046470	0.021617	0.95125
Rbm43	ENSMUSG00000036249	0.021622	0.89617
Lmf1	ENSMUSG00000002279	0.021674	0.95025
Flcn	ENSMUSG00000032633	0.021691	0.92426
RP23-423G13.11	ENSMUSG00000100396	0.021699	0.94838
Pkhd1l1	ENSMUSG00000038725	0.021711	NA
Dhx37	ENSMUSG00000029480	0.021735	0.91132
Prrxl1	ENSMUSG00000041730	0.021768	NA
5830473C10Rik	ENSMUSG00000070690	0.021792	NA
Itih5	ENSMUSG00000025780	0.021812	0.94653
Acta2	ENSMUSG00000035783	0.021814	0.95263
Angptl1	ENSMUSG00000033544	0.021818	0.95205
Gm26684	ENSMUSG00000097286	0.021819	NA
Hspb3	ENSMUSG00000051456	0.021855	0.96037
Gm27188	ENSMUSG00000099190	0.021906	NA
Fam32a	ENSMUSG00000003039	0.021969	0.90338
Ankra2	ENSMUSG00000021661	0.02197	0.88392
Prrx1	ENSMUSG00000026586	0.02198	0.9477
Gm4924	ENSMUSG00000073427	0.022073	0.95527
Ctps2	ENSMUSG00000031360	0.022103	0.88906
Gm12207	ENSMUSG00000086920	0.022116	NA
Ammecr1	ENSMUSG00000042225	0.022119	0.94436
Fmo5	ENSMUSG00000028088	0.022126	0.92709
Rxra	ENSMUSG00000015846	0.022135	0.90178
Hgs	ENSMUSG00000025793	0.022154	0.94584
Stk39	ENSMUSG00000027030	0.022188	0.94048
Cct4	ENSMUSG00000007739	0.022196	0.88906
Brpf3	ENSMUSG00000063952	0.02222	0.91913
Slc38a6	ENSMUSG00000044712	0.02224	0.93641
Sulf1	ENSMUSG00000016918	0.022242	0.95093
1700028P14Rik	ENSMUSG00000033053	0.022267	0.95786
Ccnk	ENSMUSG00000021258	0.022277	0.90084
Gm16291	ENSMUSG00000087695	0.022329	NA
Tbrg4	ENSMUSG00000000384	0.022371	0.92362
Cilp	ENSMUSG00000042254	0.022384	NA
4930517O19Rik	ENSMUSG00000054391	0.022401	NA
Elovl2	ENSMUSG00000021364	0.022405	0.93619
Rffl	ENSMUSG00000020696	0.022471	0.93529
Cops8	ENSMUSG00000034432	0.022477	0.91241
Tmem38a	ENSMUSG00000031791	0.022494	0.89936
Bsnd	ENSMUSG00000025418	0.022518	NA
4930558K02Rik	ENSMUSG00000086277	0.02255	NA
Hes1	ENSMUSG00000022528	0.022551	0.93953
Rbmx	ENSMUSG00000031134	0.022561	0.87108
Larp6	ENSMUSG00000034839	0.022608	0.90734
Lrrc2	ENSMUSG00000032495	0.022623	0.94423
Dis3l2	ENSMUSG00000053333	0.022657	0.90745
Smurf1	ENSMUSG00000038780	0.022706	0.90734
Gm15155	ENSMUSG00000055109	0.02272	NA
Slc6a7	ENSMUSG00000052026	0.022734	0.9139
Slc25a35	ENSMUSG00000018740	0.022773	0.93556
Zswim2	ENSMUSG00000034552	0.022832	NA
Chst14	ENSMUSG00000074916	0.022832	0.93491
N6amt2	ENSMUSG00000021951	0.022847	0.94528
Fam160a2	ENSMUSG00000044465	0.022865	0.88502
Telo2	ENSMUSG00000024170	0.02288	0.92345
9530034E10Rik	ENSMUSG00000086554	0.022887	NA
Gm9830	ENSMUSG00000094437	0.022898	NA
Gm15567	ENSMUSG00000084974	0.022963	NA
AV099323	ENSMUSG00000087377	0.022985	NA
Cdc42se1	ENSMUSG00000046722	0.022995	0.86215
2010013B24Rik	ENSMUSG00000087277	0.023061	NA
RP23-72A20.9	ENSMUSG00000099718	0.023104	NA
Rbm11	ENSMUSG00000032940	0.023105	0.93077
Ak3l2-ps	ENSMUSG00000081957	0.023214	NA
Tmem116	ENSMUSG00000029452	0.023227	0.94086
Ciapin1	ENSMUSG00000031781	0.023247	0.89936
4933413G19Rik	ENSMUSG00000079304	0.023256	0.95687
Eef1a2	ENSMUSG00000016349	0.023258	0.94753
Unc5b	ENSMUSG00000020099	0.023259	0.93087
Gm6415	ENSMUSG00000083820	0.023299	NA
Gm7180	ENSMUSG00000083774	0.023306	NA
Mbd2	ENSMUSG00000024513	0.023307	0.88726
Reg3b	ENSMUSG00000071356	0.023338	NA
Cog7	ENSMUSG00000034951	0.023414	0.86507
Reps1	ENSMUSG00000019854	0.023544	0.90003
Ghrh	ENSMUSG00000027643	0.023568	NA
Gm22	ENSMUSG00000043903	0.023598	0.94793
Rnf185	ENSMUSG00000020448	0.023599	0.88814
Hrasls5	ENSMUSG00000024973	0.023603	NA
[truncated: 10,303 more rows]

## Sheet: Downregulated DEGs
Gene Name	Gene ID	log2 (Fold Change)	q-value
Fst	ENSMUSG00000021765	-1.5769	4.7464e-14
Plin4	ENSMUSG00000002831	-0.961	7.5722e-05
Gm5141	ENSMUSG00000091183	-0.87772	0.00074686
Top2a	ENSMUSG00000020914	-0.86769	0.00086505
AI429214	ENSMUSG00000074384	-0.86452	7.5221e-05
Mettl11b	ENSMUSG00000040113	-0.85763	0.00068746
Scin	ENSMUSG00000002565	-0.84895	0.0013662
Itga11	ENSMUSG00000032243	-0.84728	4.6937e-06
Col11a1	ENSMUSG00000027966	-0.84465	0.00082528
Pappa2	ENSMUSG00000073530	-0.82976	0.0081007
Gm14827	ENSMUSG00000084904	-0.78873	0.0080344
Krt75	ENSMUSG00000022986	-0.78212	NA
1110002E22Rik	ENSMUSG00000090066	-0.77134	0.00014401
Ccnb1	ENSMUSG00000041431	-0.76068	NA
Scube1	ENSMUSG00000016763	-0.74467	0.0011122
Sfmbt2	ENSMUSG00000061186	-0.72835	0.0022277
Cyp26b1	ENSMUSG00000063415	-0.72676	0.001707
Satb2	ENSMUSG00000038331	-0.7258	0.0099371
Gpr83	ENSMUSG00000031932	-0.72296	1.2312e-07
Wnt2	ENSMUSG00000010797	-0.71804	0.0041642
Anpep	ENSMUSG00000039062	-0.71293	0.00088196
Per3	ENSMUSG00000028957	-0.71178	0.00056713
Gm12371	ENSMUSG00000084898	-0.70921	0.025948
Erich5	ENSMUSG00000044726	-0.70803	0.032916
Kcnj2	ENSMUSG00000041695	-0.70463	0.006541
Fmo2	ENSMUSG00000040170	-0.70459	0.022742
I830012O16Rik	ENSMUSG00000062488	-0.69828	0.00010693
Fam208a	ENSMUSG00000040651	-0.68682	0.00021929
Dlx1as	ENSMUSG00000084946	-0.68435	0.017885
Hist1h2bg	ENSMUSG00000058385	-0.68349	0.042397
Fv1	ENSMUSG00000070583	-0.68212	0.0045513
Npc1l1	ENSMUSG00000020447	-0.68113	0.043363
Drd1a	ENSMUSG00000021478	-0.67919	0.0049678
Mki67	ENSMUSG00000031004	-0.67848	0.024261
Pdzd2	ENSMUSG00000022197	-0.66955	0.0053072
Clspn	ENSMUSG00000042489	-0.66736	0.026002
Arhgap4	ENSMUSG00000031389	-0.66495	0.021
Chrna5	ENSMUSG00000035594	-0.66465	0.00048037
Gm15879	ENSMUSG00000084790	-0.66425	0.04411
Ciita	ENSMUSG00000022504	-0.66293	NA
4931415C17Rik	ENSMUSG00000054910	-0.66254	0.015392
Epha6	ENSMUSG00000055540	-0.65996	0.0049339
Shisa6	ENSMUSG00000053930	-0.65952	0.0011527
Hpse	ENSMUSG00000035273	-0.65629	0.037593
Podxl	ENSMUSG00000025608	-0.65608	2.7107e-08
Tsga10	ENSMUSG00000060771	-0.65583	6.0295e-06
Pbk	ENSMUSG00000022033	-0.65535	0.052599
B3gnt3	ENSMUSG00000031803	-0.65197	0.00394
Htr5a	ENSMUSG00000039106	-0.65048	0.0018764
Ror1	ENSMUSG00000035305	-0.6488	0.0090311
Adam8	ENSMUSG00000025473	-0.64862	0.031469
Myt1l	ENSMUSG00000061911	-0.64816	0.0019702
Ggcx	ENSMUSG00000053460	-0.64444	0.00028065
Hist1h2be	ENSMUSG00000047246	-0.64382	0.0003219
Tnfsf10	ENSMUSG00000039304	-0.64306	0.053178
Iqgap2	ENSMUSG00000021676	-0.64153	0.023366
Gm16638	ENSMUSG00000087088	-0.6372	0.061271
Lrg1	ENSMUSG00000037095	-0.63333	0.034615
Mesp2	ENSMUSG00000030543	-0.63129	0.056847
Trpv6	ENSMUSG00000029868	-0.63041	0.0013216
Lct	ENSMUSG00000026354	-0.63015	0.0015264
Npbwr1	ENSMUSG00000033774	-0.62937	0.045738
Grik3	ENSMUSG00000001985	-0.62874	6.6022e-06
Tbr1	ENSMUSG00000035033	-0.62564	0.0002164
Blnk	ENSMUSG00000061132	-0.62461	0.0085149
Plag1	ENSMUSG00000003282	-0.62295	0.066286
RP24-63O23.1	ENSMUSG00000100851	-0.62146	NA
5330426P16Rik	ENSMUSG00000022639	-0.62011	4.7301e-07
Slc25a42	ENSMUSG00000002346	-0.62008	9.3146e-07
Hectd2	ENSMUSG00000041180	-0.61739	0.071632
Tnfaip8l3	ENSMUSG00000074345	-0.61659	0.028743
Ndufb2	ENSMUSG00000002416	-0.61633	6.8235e-05
Ube2c	ENSMUSG00000001403	-0.61478	0.068811
Fgf16	ENSMUSG00000031230	-0.61319	0.0036183
Chordc1	ENSMUSG00000001774	-0.61056	7.9119e-07
Cdc7	ENSMUSG00000029283	-0.60995	0.0017873
Setbp1	ENSMUSG00000024548	-0.60866	0.010639
Zfp599	ENSMUSG00000062794	-0.60639	0.010515
Atp2c2	ENSMUSG00000034112	-0.60633	1.6013e-05
Trpc5	ENSMUSG00000041710	-0.6058	0.077244
B430212C06Rik	ENSMUSG00000046415	-0.6058	0.0018356
Slx4ip	ENSMUSG00000027281	-0.60277	0.00075664
Gm5124	ENSMUSG00000051537	-0.60263	0.015803
Cdk15	ENSMUSG00000026023	-0.60261	0.079097
Cntnap5c	ENSMUSG00000038048	-0.60218	0.07687
Kdr	ENSMUSG00000062960	-0.60207	0.0016882
Oprd1	ENSMUSG00000050511	-0.60144	0.078401
Moxd1	ENSMUSG00000020000	-0.60113	0.00047961
Arhgap20	ENSMUSG00000053199	-0.59845	0.018492
Dync2h1	ENSMUSG00000047193	-0.59824	0.00083412
Gsx1	ENSMUSG00000053129	-0.59737	0.062629
8030453O22Rik	ENSMUSG00000085058	-0.59451	0.0080344
Gm15906	ENSMUSG00000087416	-0.59276	0.082358
Gm11549	ENSMUSG00000085007	-0.5914	0.0025322
Stxbp5l	ENSMUSG00000022829	-0.58975	0.085979
Akap5	ENSMUSG00000021057	-0.58942	0.00036163
Gm27247	ENSMUSG00000098760	-0.58867	0.076222
H19	ENSMUSG00000000031	-0.58689	NA
Sorl1	ENSMUSG00000049313	-0.58599	0.000243
Ryr3	ENSMUSG00000057378	-0.58299	0.063808
Plcb2	ENSMUSG00000040061	-0.58279	0.0047588
Slc38a5	ENSMUSG00000031170	-0.58234	0.010212
Ftx	ENSMUSG00000086370	-0.58214	0.028024
Gm26843	ENSMUSG00000097520	-0.58112	0.073206
Gm17732	ENSMUSG00000091744	-0.58097	0.076109
Robo3	ENSMUSG00000032128	-0.58095	0.0099131
Gm11201	ENSMUSG00000085941	-0.57937	NA
Rbm28	ENSMUSG00000029701	-0.57896	1.1776e-09
Kcna4	ENSMUSG00000042604	-0.57886	0.00025692
Grin2b	ENSMUSG00000030209	-0.57557	0.002156
Tmc4	ENSMUSG00000019734	-0.57515	0.086495
Gm16299	ENSMUSG00000089679	-0.57464	NA
Zbtb40	ENSMUSG00000060862	-0.5746	0.00029054
Card6	ENSMUSG00000041849	-0.57457	0.020288
Abcc9	ENSMUSG00000030249	-0.57431	0.0013412
Il12rb2	ENSMUSG00000018341	-0.5724	0.04926
Samd12	ENSMUSG00000058656	-0.57221	0.067063
Tmem181b-ps	ENSMUSG00000096780	-0.57142	0.015942
Hunk	ENSMUSG00000053414	-0.57039	0.00027875
Rngtt	ENSMUSG00000028274	-0.57024	5.2962e-05
Abca9	ENSMUSG00000041797	-0.57002	0.053645
Vwc2l	ENSMUSG00000045648	-0.56963	0.014951
Foxm1	ENSMUSG00000001517	-0.56952	0.020677
Hip1	ENSMUSG00000039959	-0.56951	0.0011791
Gm17484	ENSMUSG00000091514	-0.56934	0.09906
Tk1	ENSMUSG00000025574	-0.56722	0.07508
Gm16267	ENSMUSG00000084979	-0.56719	0.10121
Tll1	ENSMUSG00000053626	-0.5661	0.087838
Crhbp	ENSMUSG00000021680	-0.56548	0.00079169
Adam1a	ENSMUSG00000072647	-0.56477	0.043684
Plxna4	ENSMUSG00000029765	-0.5642	0.027172
Kif18a	ENSMUSG00000027115	-0.5637	0.10026
Sema3e	ENSMUSG00000063531	-0.56332	0.020566
Glt8d2	ENSMUSG00000020251	-0.56308	0.028024
Gpr21	ENSMUSG00000053164	-0.56273	0.09841
Sorcs3	ENSMUSG00000063434	-0.56262	0.0018764
Ttc37	ENSMUSG00000033991	-0.56256	0.078433
Epha3	ENSMUSG00000052504	-0.56218	0.017872
Wdr5b	ENSMUSG00000034379	-0.56215	0.018534
Rhbdl1	ENSMUSG00000025735	-0.5616	NA
Mterf1b	ENSMUSG00000053178	-0.56135	0.071632
Ap4e1	ENSMUSG00000001998	-0.55943	0.10112
Eml6	ENSMUSG00000044072	-0.55658	0.097276
Rgs7bp	ENSMUSG00000021719	-0.55654	0.060329
Vps13a	ENSMUSG00000046230	-0.55633	0.068448
1110002J07Rik	ENSMUSG00000097134	-0.55626	NA
Msr1	ENSMUSG00000025044	-0.55612	NA
Kcnj6	ENSMUSG00000043301	-0.55568	0.073724
Zmym6	ENSMUSG00000042408	-0.55551	0.059775
Gm11827	ENSMUSG00000086765	-0.55492	0.11082
Atad5	ENSMUSG00000017550	-0.55478	0.029824
Gm11627	ENSMUSG00000078640	-0.55424	0.042357
Rxfp1	ENSMUSG00000034009	-0.55421	0.082358
Ccr5	ENSMUSG00000079227	-0.55314	0.026523
Gm10118	ENSMUSG00000062561	-0.55213	0.086293
Trhde	ENSMUSG00000050663	-0.55072	0.018892
Osbpl6	ENSMUSG00000042359	-0.54988	0.0014302
Slc39a10	ENSMUSG00000025986	-0.54984	0.025235
Gm15721	ENSMUSG00000085565	-0.54965	0.079232
Gm12696	ENSMUSG00000084159	-0.5494	0.040594
Gm7308	ENSMUSG00000081113	-0.54921	0.093451
Gm20691	ENSMUSG00000093505	-0.54878	NA
Mdn1	ENSMUSG00000058006	-0.54777	0.057407
Ccna2	ENSMUSG00000027715	-0.5468	0.10059
Spink10	ENSMUSG00000044176	-0.54651	0.097461
Clec2d	ENSMUSG00000030157	-0.5464	0.044123
Gm15608	ENSMUSG00000087481	-0.5461	NA
Chrm3	ENSMUSG00000046159	-0.54568	0.017522
Trib2	ENSMUSG00000020601	-0.54532	9.7331e-08
Gabrb1	ENSMUSG00000029212	-0.54473	0.0091266
Fam188b2	ENSMUSG00000101860	-0.54413	0.11943
Inf2	ENSMUSG00000037679	-0.54368	0.014613
4930578C19Rik	ENSMUSG00000037358	-0.54356	0.116
Ogn	ENSMUSG00000021390	-0.54179	0.068811
Anks4b	ENSMUSG00000030909	-0.54146	NA
Shisa7	ENSMUSG00000053550	-0.54091	7.7098e-05
Kcnma1	ENSMUSG00000063142	-0.54053	0.091604
Ralgapa1	ENSMUSG00000021027	-0.53979	0.017742
Wipf3	ENSMUSG00000086040	-0.53957	0.00028751
Slit2	ENSMUSG00000031558	-0.53948	0.066846
Calr	ENSMUSG00000003814	-0.53945	8.1527e-10
Myh2	ENSMUSG00000033196	-0.53864	NA
Ly6g6e	ENSMUSG00000013766	-0.53781	0.08744
Usp29	ENSMUSG00000051527	-0.53725	0.1247
Prc1	ENSMUSG00000038943	-0.5371	0.053014
Neto2	ENSMUSG00000036902	-0.53703	0.00032603
Map10	ENSMUSG00000050930	-0.53697	0.069827
Kirrel2	ENSMUSG00000036915	-0.5365	0.014119
Arhgap26	ENSMUSG00000036452	-0.53466	4.6632e-07
Gm15893	ENSMUSG00000085246	-0.53302	NA
Dock4	ENSMUSG00000035954	-0.5328	0.082358
Ago3	ENSMUSG00000028842	-0.53257	1.251e-05
Klf7	ENSMUSG00000025959	-0.53256	0.12698
Tnr	ENSMUSG00000015829	-0.53223	0.12353
Uggt1	ENSMUSG00000037470	-0.53172	0.0018059
Fat3	ENSMUSG00000074505	-0.53053	0.065225
Dmtf1	ENSMUSG00000042508	-0.52983	0.0099131
Rab39	ENSMUSG00000055069	-0.52879	0.09906
Nkx2-1	ENSMUSG00000001496	-0.52865	0.10506
Rab27a	ENSMUSG00000032202	-0.52865	0.011801
Eomes	ENSMUSG00000032446	-0.52798	0.10737
Prkca	ENSMUSG00000050965	-0.52788	0.0070646
Dspp	ENSMUSG00000053268	-0.52574	NA
Inhba	ENSMUSG00000041324	-0.52555	0.13362
Usp45	ENSMUSG00000040455	-0.52553	0.0080344
Dpysl5	ENSMUSG00000029168	-0.52485	0.00036163
Dsc3	ENSMUSG00000059898	-0.52468	0.13529
Mstn	ENSMUSG00000026100	-0.52445	NA
Exoc6b	ENSMUSG00000033769	-0.52387	1.4121e-06
Gm6483	ENSMUSG00000087153	-0.52343	0.078005
Gpr26	ENSMUSG00000040125	-0.5233	0.0057972
Zfp518a	ENSMUSG00000049164	-0.52289	0.035559
9230112E08Rik	ENSMUSG00000070461	-0.52246	0.0086898
Recql4	ENSMUSG00000033762	-0.5223	0.036407
Dclk1	ENSMUSG00000027797	-0.52192	0.00056713
Cenpj	ENSMUSG00000064128	-0.5219	0.09362
Dgkh	ENSMUSG00000034731	-0.52092	0.13415
Dnase1	ENSMUSG00000005980	-0.52012	0.078048
Myef2	ENSMUSG00000027201	-0.51996	0.048754
Dlx6os1	ENSMUSG00000090063	-0.51942	0.0057972
Hltf	ENSMUSG00000002428	-0.51936	0.014951
Myh4	ENSMUSG00000057003	-0.5192	0.13892
Rbl1	ENSMUSG00000027641	-0.51869	0.13218
Uhrf1	ENSMUSG00000001228	-0.51695	0.082358
Hist1h2ad	ENSMUSG00000071478	-0.5166	NA
Gm17641	ENSMUSG00000091272	-0.5161	0.13104
Obscn	ENSMUSG00000061462	-0.51585	0.012958
Zmym1	ENSMUSG00000043872	-0.51532	0.051242
Fermt1	ENSMUSG00000027356	-0.51363	0.069485
Pcdhb4	ENSMUSG00000045689	-0.51238	0.0091498
Zeb2	ENSMUSG00000026872	-0.51229	0.025948
Cacna1e	ENSMUSG00000004110	-0.51196	3.8466e-05
F420014N23Rik	ENSMUSG00000097331	-0.51163	0.1334
Htr1a	ENSMUSG00000021721	-0.51125	0.053645
Rfx3	ENSMUSG00000040929	-0.51109	0.040322
Ccdc167	ENSMUSG00000024018	-0.51093	0.052525
Gm27252	ENSMUSG00000098708	-0.51066	0.14312
Gm16183	ENSMUSG00000086067	-0.51057	NA
Prkag2os2	ENSMUSG00000087314	-0.51052	NA
Nabp1	ENSMUSG00000026107	-0.51037	0.046462
Samd15	ENSMUSG00000090812	-0.50993	0.051344
Zfp398	ENSMUSG00000062519	-0.5096	0.021914
4930540M05Rik	ENSMUSG00000097831	-0.50868	NA
Cacna1h	ENSMUSG00000024112	-0.50867	0.022662
Gm10311	ENSMUSG00000071083	-0.50791	0.1495
Zbtb20	ENSMUSG00000022708	-0.50784	0.0090311
Dclre1c	ENSMUSG00000026648	-0.50769	0.071632
Zfp169	ENSMUSG00000050954	-0.50725	0.083082
Wdfy3	ENSMUSG00000043940	-0.50628	0.028135
Gm26834	ENSMUSG00000097307	-0.50589	0.14697
Hsp90b1	ENSMUSG00000020048	-0.505	2.4171e-12
Klhl6	ENSMUSG00000043008	-0.50374	0.064748
Pirt	ENSMUSG00000048070	-0.50312	0.037593
Gm21989	ENSMUSG00000090370	-0.50272	0.1489
Vopp1	ENSMUSG00000037788	-0.50196	9.2153e-07
Srl	ENSMUSG00000022519	-0.50184	0.00025748
Zfp182	ENSMUSG00000054737	-0.50178	0.081654
Kcna3	ENSMUSG00000047959	-0.50171	0.15616
Gucy1a2	ENSMUSG00000041624	-0.50101	0.15398
Zmynd8	ENSMUSG00000039671	-0.49982	0.00036678
Cenpf	ENSMUSG00000026605	-0.49962	0.13495
Sphkap	ENSMUSG00000026163	-0.49955	0.077335
Hsph1	ENSMUSG00000029657	-0.4993	4.5248e-06
Fer1l5	ENSMUSG00000037432	-0.49895	0.00083412
Gm6277	ENSMUSG00000097440	-0.49856	0.13147
R3hdm1	ENSMUSG00000056211	-0.49851	4.0623e-06
Rpgrip1l	ENSMUSG00000033282	-0.49833	0.030891
Ccdc129	ENSMUSG00000037973	-0.49813	0.048052
Gbp5	ENSMUSG00000040264	-0.49629	0.15325
F13a1	ENSMUSG00000039109	-0.49605	0.14217
Rgl1	ENSMUSG00000026482	-0.49597	0.014951
Gm16758	ENSMUSG00000086534	-0.49596	0.092545
Nmbr	ENSMUSG00000019865	-0.49576	0.1045
Sel1l	ENSMUSG00000020964	-0.4953	0.0059181
Acvr2a	ENSMUSG00000052155	-0.49396	0.10294
Glns-ps1	ENSMUSG00000082100	-0.4936	0.15261
Zgpat	ENSMUSG00000027582	-0.4934	0.0014352
Rnasel	ENSMUSG00000066800	-0.49296	0.10506
Tbx21	ENSMUSG00000001444	-0.49222	0.16447
5830416P10Rik	ENSMUSG00000097636	-0.49216	0.075082
Ahr	ENSMUSG00000019256	-0.49179	0.052144
Cml3	ENSMUSG00000051262	-0.49149	0.13141
Smg1	ENSMUSG00000030655	-0.49076	0.079426
Racgap1	ENSMUSG00000023015	-0.49055	0.0013134
Ptgs2	ENSMUSG00000032487	-0.48997	0.071632
Tmprss6	ENSMUSG00000016942	-0.48957	0.1531
Runx1t1	ENSMUSG00000006586	-0.48851	0.019922
Casp4	ENSMUSG00000033538	-0.48818	NA
Rad51c	ENSMUSG00000007646	-0.48814	0.014545
Zc3h6	ENSMUSG00000042851	-0.48791	0.014244
Fbn2	ENSMUSG00000024598	-0.48789	0.058783
1110019D14Rik	ENSMUSG00000097616	-0.48764	0.14077
Trim2	ENSMUSG00000027993	-0.48754	0.03324
Kcnh7	ENSMUSG00000059742	-0.48749	0.078562
Knstrn	ENSMUSG00000027331	-0.48739	0.16156
Onecut2	ENSMUSG00000045991	-0.48641	0.072449
Lypd1	ENSMUSG00000026344	-0.48607	0.010696
Hcrtr2	ENSMUSG00000032360	-0.48587	0.081042
Nusap1	ENSMUSG00000027306	-0.48567	0.086715
Zfp455	ENSMUSG00000051037	-0.48427	0.13653
Urah	ENSMUSG00000025481	-0.48411	0.17031
BC068281	ENSMUSG00000051721	-0.4837	0.10687
Dsel	ENSMUSG00000038702	-0.48357	0.072449
Zfp318	ENSMUSG00000015597	-0.48356	0.059107
Mllt3	ENSMUSG00000028496	-0.48325	0.00039755
Fam78b	ENSMUSG00000060568	-0.48325	0.0073321
5330416C01Rik	ENSMUSG00000054944	-0.48148	0.1748
Smchd1	ENSMUSG00000024054	-0.48136	0.04492
Gm10644	ENSMUSG00000074219	-0.48131	0.17463
Tert	ENSMUSG00000021611	-0.48124	0.15426
Ubxn2b	ENSMUSG00000028243	-0.48067	0.02542
Lrrc7	ENSMUSG00000028176	-0.48064	0.1687
Zfp831	ENSMUSG00000050600	-0.48057	0.045987
Gm13625	ENSMUSG00000089902	-0.48051	NA
Dock9	ENSMUSG00000025558	-0.48029	0.058095
Gm14137	ENSMUSG00000055926	-0.48029	0.16447
Panct2	ENSMUSG00000097814	-0.4801	0.12229
Slc22a7	ENSMUSG00000067144	-0.47979	0.16665
Lpar6	ENSMUSG00000033446	-0.47942	0.081511
Cep41	ENSMUSG00000029790	-0.4791	0.074186
Grin1os	ENSMUSG00000085830	-0.47904	0.1643
Zfp143	ENSMUSG00000061079	-0.47867	0.0035088
Ryr1	ENSMUSG00000030592	-0.47836	0.066038
Efcab5	ENSMUSG00000050944	-0.47825	0.14429
Ccdc171	ENSMUSG00000052407	-0.47796	0.17331
Rab27b	ENSMUSG00000024511	-0.47768	0.013754
Acan	ENSMUSG00000030607	-0.47747	0.044123
Otos	ENSMUSG00000044055	-0.47686	0.14035
Krt83	ENSMUSG00000047641	-0.47681	0.13869
Tmem82	ENSMUSG00000043085	-0.47674	0.15974
Ap1m2	ENSMUSG00000003309	-0.47668	0.18167
P2ry13	ENSMUSG00000036362	-0.47579	0.00087691
Gm26779	ENSMUSG00000097140	-0.47563	0.18189
Irgm2	ENSMUSG00000069874	-0.47553	0.063132
Zfp442	ENSMUSG00000068130	-0.4755	0.16961
Kdm7a	ENSMUSG00000042599	-0.47479	0.056551
Syn3	ENSMUSG00000059602	-0.47476	0.045353
Atf6	ENSMUSG00000026663	-0.47443	0.02373
Vamp7-ps	ENSMUSG00000082519	-0.47443	0.18065
Actn1	ENSMUSG00000015143	-0.47429	0.029567
Acot11	ENSMUSG00000034853	-0.47415	2.5691e-06
RP23-184B11.4	ENSMUSG00000100334	-0.47378	NA
Zfp799	ENSMUSG00000095253	-0.47352	0.00098435
Chrm5	ENSMUSG00000074939	-0.47288	0.17761
Has3	ENSMUSG00000031910	-0.4727	0.08759
Thpo	ENSMUSG00000022847	-0.4726	0.070958
Fam135b	ENSMUSG00000036800	-0.47233	0.18553
Ints2	ENSMUSG00000018068	-0.47231	0.17652
Erbb4	ENSMUSG00000062209	-0.4723	0.096466
Ust	ENSMUSG00000047712	-0.472	0.063185
Mpdz	ENSMUSG00000028402	-0.4719	0.11284
Prdm15	ENSMUSG00000014039	-0.47173	0.078182
Krit1	ENSMUSG00000000600	-0.47169	0.0035088
Nyx	ENSMUSG00000051228	-0.47167	0.12798
Wfs1	ENSMUSG00000039474	-0.47153	0.11113
Zfp608	ENSMUSG00000052713	-0.47087	0.073117
Klf5	ENSMUSG00000005148	-0.47035	0.14292
Gm13830	ENSMUSG00000086368	-0.47032	0.14916
Gm26724	ENSMUSG00000097090	-0.46995	NA
Als2	ENSMUSG00000026024	-0.46994	0.11074
Dgcr8	ENSMUSG00000022718	-0.46993	0.11982
Dzip3	ENSMUSG00000064061	-0.46894	0.038997
Ddx11	ENSMUSG00000035842	-0.46878	0.13846
Tra2a	ENSMUSG00000029817	-0.46872	0.00027557
Pknox1	ENSMUSG00000006705	-0.46869	0.00067831
Hnf1b	ENSMUSG00000020679	-0.46835	0.18973
Tbck	ENSMUSG00000028030	-0.46808	0.18991
Gm16894	ENSMUSG00000097899	-0.46791	0.18752
Mbd5	ENSMUSG00000036792	-0.46724	0.0058485
Adam19	ENSMUSG00000011256	-0.46703	0.073022
RP23-375H15.1	ENSMUSG00000100666	-0.46685	0.18991
A730017L22Rik	ENSMUSG00000085566	-0.46682	0.0080344
Bod1l	ENSMUSG00000061755	-0.46677	0.10488
Slc16a14	ENSMUSG00000026220	-0.46642	0.17487
Dpf3	ENSMUSG00000021221	-0.4663	0.028904
Tbx15	ENSMUSG00000027868	-0.46623	0.18395
Ubash3a	ENSMUSG00000042345	-0.46612	0.1597
Kcns2	ENSMUSG00000050963	-0.46595	0.034538
Gm2115	ENSMUSG00000097789	-0.46521	0.079733
5830417I10Rik	ENSMUSG00000078684	-0.46509	0.097695
Grin2a	ENSMUSG00000059003	-0.4647	0.19043
Prokr2	ENSMUSG00000050558	-0.46465	0.11296
Myadm	ENSMUSG00000068566	-0.46461	2.9903e-06
Ipo7	ENSMUSG00000066232	-0.46451	0.15901
Slc2a13	ENSMUSG00000036298	-0.46428	0.017071
Ckap2l	ENSMUSG00000048327	-0.46386	0.19124
Skil	ENSMUSG00000027660	-0.46384	0.042397
Plcxd2	ENSMUSG00000087141	-0.46353	0.099114
Nwd2	ENSMUSG00000090061	-0.46327	0.14434
D430041D05Rik	ENSMUSG00000068373	-0.46321	0.012095
Zbtbd6	ENSMUSG00000075502	-0.46315	0.15435
Erc2	ENSMUSG00000040640	-0.46279	0.083597
Htr1b	ENSMUSG00000049511	-0.46244	0.033294
Lphn2	ENSMUSG00000028184	-0.46239	0.067832
Gm14455	ENSMUSG00000087633	-0.46154	0.19523
Nebl	ENSMUSG00000053702	-0.46144	0.0754
Zfp97	ENSMUSG00000095990	-0.46099	0.11761
Rspo2	ENSMUSG00000051920	-0.46098	0.089587
Ptprg	ENSMUSG00000021745	-0.46094	0.083264
Nxph4	ENSMUSG00000040258	-0.46084	0.17403
Gm26868	ENSMUSG00000097870	-0.46075	NA
Plau	ENSMUSG00000021822	-0.46032	0.099997
Itsn2	ENSMUSG00000020640	-0.46001	0.13133
Col7a1	ENSMUSG00000025650	-0.45994	0.17928
Cachd1	ENSMUSG00000028532	-0.45981	0.011017
Ccnt2	ENSMUSG00000026349	-0.4598	0.0016006
Gm9903	ENSMUSG00000097271	-0.45972	NA
Cckbr	ENSMUSG00000030898	-0.4596	0.040299
Slc10a7	ENSMUSG00000031684	-0.45941	0.058678
Lamc2	ENSMUSG00000026479	-0.45918	0.18155
Mical3	ENSMUSG00000003178	-0.45855	0.19918
Npnt	ENSMUSG00000040998	-0.45852	0.064797
Ly6c1	ENSMUSG00000079018	-0.45821	0.073617
Gm11730	ENSMUSG00000087057	-0.4578	0.20104
Enpep	ENSMUSG00000028024	-0.45714	0.11094
Med12l	ENSMUSG00000056476	-0.45664	0.19942
Phtf1	ENSMUSG00000058388	-0.4565	2.7395e-06
Mertk	ENSMUSG00000014361	-0.45623	0.085114
Iigp1	ENSMUSG00000054072	-0.45617	0.16956
Zfp280d	ENSMUSG00000038535	-0.45615	0.069615
Vps13b	ENSMUSG00000037646	-0.45592	0.05649
Tmc5	ENSMUSG00000030650	-0.4557	NA
Kmt2c	ENSMUSG00000038056	-0.45528	0.068831
Mdga1	ENSMUSG00000043557	-0.45504	0.0082334
Bmp3	ENSMUSG00000029335	-0.45466	0.14271
Stard5	ENSMUSG00000046027	-0.45447	0.0014181
Fut9	ENSMUSG00000055373	-0.45447	0.045781
Heatr5b	ENSMUSG00000039414	-0.45438	0.069608
Zfp709	ENSMUSG00000056019	-0.4542	0.040428
Npy2r	ENSMUSG00000028004	-0.45413	0.099114
H2-T24	ENSMUSG00000053835	-0.45406	0.13133
Rasal2	ENSMUSG00000070565	-0.454	0.04122
Anxa11	ENSMUSG00000021866	-0.45369	0.057429
Pcdh17	ENSMUSG00000035566	-0.45347	0.14403
Rnf150	ENSMUSG00000047747	-0.4528	0.049294
AA474331	ENSMUSG00000096687	-0.45249	0.054527
Glis3	ENSMUSG00000052942	-0.45223	0.12791
Reps2	ENSMUSG00000040855	-0.45212	0.0086628
Derl3	ENSMUSG00000009092	-0.45108	0.11237
Raver2	ENSMUSG00000035275	-0.45105	0.0067335
Tmem210	ENSMUSG00000026963	-0.45086	0.1787
Cdh19	ENSMUSG00000047216	-0.4508	0.047788
Atad2	ENSMUSG00000022360	-0.45068	0.099114
Pds5a	ENSMUSG00000029202	-0.45066	0.19523
Pggt1b	ENSMUSG00000024477	-0.45004	0.16981
Il1rapl2	ENSMUSG00000059203	-0.44947	0.15524
Elavl4	ENSMUSG00000028546	-0.44946	0.018291
Pla2g2f	ENSMUSG00000028749	-0.44936	0.0094877
Tmtc4	ENSMUSG00000041594	-0.44934	0.015429
Tll2	ENSMUSG00000025013	-0.44914	0.2088
Ap2b1	ENSMUSG00000035152	-0.44857	0.00024634
Prdm10	ENSMUSG00000042496	-0.44795	0.076222
St8sia3	ENSMUSG00000056812	-0.44787	6.2597e-06
Slc2a4rg-ps	ENSMUSG00000085028	-0.44734	0.097187
Il2ra	ENSMUSG00000026770	-0.44732	NA
Kif21a	ENSMUSG00000022629	-0.44724	0.087838
Zyg11b	ENSMUSG00000034636	-0.44712	0.058096
Stat2	ENSMUSG00000040033	-0.447	0.0023181
Aass	ENSMUSG00000029695	-0.44676	0.064472
Pgm2l1	ENSMUSG00000030729	-0.44673	0.0014302
Xpo1	ENSMUSG00000020290	-0.4467	0.030689
Plxnc1	ENSMUSG00000074785	-0.44661	0.045116
Arsi	ENSMUSG00000036412	-0.44609	0.12735
Satb1	ENSMUSG00000023927	-0.44606	0.031926
Ppm1e	ENSMUSG00000046442	-0.44602	0.057407
Npsr1	ENSMUSG00000043659	-0.44524	0.21433
Kbtbd13	ENSMUSG00000054978	-0.44519	0.21422
Tia1	ENSMUSG00000071337	-0.44517	0.06311
Gm9017	ENSMUSG00000089685	-0.44508	0.20392
A930018M24Rik	ENSMUSG00000091089	-0.44484	0.21433
Rrm2	ENSMUSG00000020649	-0.44465	0.12612
Tpsg1	ENSMUSG00000033200	-0.44463	NA
Gm4944	ENSMUSG00000096433	-0.44443	0.044277
Ptprt	ENSMUSG00000053141	-0.44439	0.045738
Dmrt2	ENSMUSG00000048138	-0.44421	0.18468
2010002M12Rik	ENSMUSG00000067297	-0.44387	0.21433
Usp9x	ENSMUSG00000031010	-0.44373	0.20882
Slc35f3	ENSMUSG00000057060	-0.44296	0.070973
Hcn1	ENSMUSG00000021730	-0.44282	0.16112
Zfp644	ENSMUSG00000049606	-0.44282	0.021879
Usp40	ENSMUSG00000005501	-0.44279	0.02031
Fbxl12os	ENSMUSG00000062470	-0.44254	0.13655
Arhgap19	ENSMUSG00000025154	-0.44252	0.12735
Ptprb	ENSMUSG00000020154	-0.44223	0.031776
Thsd4	ENSMUSG00000032289	-0.44171	0.096466
Adamts6	ENSMUSG00000046169	-0.44152	0.21163
Nol4	ENSMUSG00000041923	-0.44139	0.090739
9930021J03Rik	ENSMUSG00000046138	-0.44099	0.11962
Gm17473	ENSMUSG00000097805	-0.44097	NA
Bbs12	ENSMUSG00000051444	-0.44074	0.037338
Ptpru	ENSMUSG00000028909	-0.4407	0.0060005
Mcmdc2	ENSMUSG00000046101	-0.44066	0.17037
Lrrk2	ENSMUSG00000036273	-0.4406	0.13684
Fzd3	ENSMUSG00000007989	-0.44019	0.1673
Kcng3	ENSMUSG00000045053	-0.44009	0.21972
Uba6	ENSMUSG00000035898	-0.44001	0.080963
Atm	ENSMUSG00000034218	-0.43973	0.21916
Pid1	ENSMUSG00000045658	-0.43963	0.00039126
Mical2	ENSMUSG00000038244	-0.43952	0.0057747
Gm8508	ENSMUSG00000049477	-0.43921	NA
Gm14122	ENSMUSG00000083964	-0.4392	0.21982
Tmem200b	ENSMUSG00000070720	-0.43903	0.14454
Pkp1	ENSMUSG00000026413	-0.43885	NA
Rasgrp1	ENSMUSG00000027347	-0.43884	4.316e-05
Npepps	ENSMUSG00000001441	-0.4386	3.8694e-05
Zfp961	ENSMUSG00000052446	-0.43853	0.018592
Foxp1	ENSMUSG00000030067	-0.43846	0.00033312
Nudt5	ENSMUSG00000025817	-0.43843	0.00053827
Ifit3	ENSMUSG00000074896	-0.43831	0.091713
Tcf4	ENSMUSG00000053477	-0.43796	0.03945
Acap2	ENSMUSG00000049076	-0.43781	0.013523
AC152164.1	ENSMUSG00000101635	-0.43736	0.22288
Tanc1	ENSMUSG00000035168	-0.43732	0.021083
Grem1	ENSMUSG00000074934	-0.43701	0.13605
Firre	ENSMUSG00000085396	-0.43688	0.089456
Zfp595	ENSMUSG00000057842	-0.43666	0.10264
Dnah8	ENSMUSG00000033826	-0.43662	0.18312
Usp31	ENSMUSG00000063317	-0.43649	0.0161
Samd3	ENSMUSG00000051354	-0.43639	NA
Pdgfrb	ENSMUSG00000024620	-0.43611	1.0022e-05
Pde4c	ENSMUSG00000031842	-0.43609	0.2021
Nrde2	ENSMUSG00000021179	-0.43607	0.0020849
Ets1	ENSMUSG00000032035	-0.43602	0.057175
Cd248	ENSMUSG00000056481	-0.43595	0.16339
Gen1	ENSMUSG00000051235	-0.4357	0.18389
Gm340	ENSMUSG00000090673	-0.43567	0.20823
Dcbld2	ENSMUSG00000035107	-0.43529	0.18762
Spc25	ENSMUSG00000005233	-0.43523	0.21003
Igsf9	ENSMUSG00000037995	-0.43509	0.051164
A330023F24Rik	ENSMUSG00000096929	-0.43492	0.099259
Fam212b	ENSMUSG00000048458	-0.43469	0.013405
Caprin1	ENSMUSG00000027184	-0.43449	0.030645
2810417H13Rik	ENSMUSG00000040204	-0.43415	0.2088
Zfp760	ENSMUSG00000067928	-0.43411	0.023788
Pyroxd1	ENSMUSG00000041671	-0.43402	0.19112
Pxdn	ENSMUSG00000020674	-0.43396	0.099932
Scn3a	ENSMUSG00000057182	-0.43388	0.10413
Thrb	ENSMUSG00000021779	-0.43384	0.010705
Mroh2a	ENSMUSG00000079429	-0.43356	0.080412
Ttc30a1	ENSMUSG00000075271	-0.43354	0.021384
Fam13b	ENSMUSG00000036501	-0.43301	0.20612
Sh3rf3	ENSMUSG00000037990	-0.4328	0.10264
Aff3	ENSMUSG00000037138	-0.43265	0.0036972
Dnah17	ENSMUSG00000033987	-0.43223	0.18094
Jazf1	ENSMUSG00000063568	-0.43217	0.075082
Bcl11b	ENSMUSG00000048251	-0.43215	0.068616
Pde10a	ENSMUSG00000023868	-0.4321	0.090632
Lman2l	ENSMUSG00000001143	-0.43198	0.0012189
Atp13a5	ENSMUSG00000048939	-0.43191	0.024439
Flt4	ENSMUSG00000020357	-0.43161	0.020367
Frrs1l	ENSMUSG00000045589	-0.43121	0.0069218
Plcl1	ENSMUSG00000038349	-0.4311	0.066953
Parm1	ENSMUSG00000034981	-0.43099	0.052144
Kcnq3	ENSMUSG00000056258	-0.43084	0.007502
Hspa4l	ENSMUSG00000025757	-0.43077	0.0093697
Etv1	ENSMUSG00000004151	-0.43043	0.11082
Hist2h4	ENSMUSG00000091405	-0.43041	0.20481
Focad	ENSMUSG00000038368	-0.43004	0.11962
Zbtb18	ENSMUSG00000063659	-0.4299	0.025378
Mgea5	ENSMUSG00000025220	-0.42977	0.014129
Ttc14	ENSMUSG00000027677	-0.42974	0.058234
Hcrtr1	ENSMUSG00000028778	-0.42968	0.1786
Plcb1	ENSMUSG00000051177	-0.42951	0.067828
Cntnap4	ENSMUSG00000031772	-0.42946	0.066255
Tnks	ENSMUSG00000031529	-0.42933	0.2308
Nid1	ENSMUSG00000005397	-0.42909	0.17148
Zfp507	ENSMUSG00000044452	-0.42902	0.23228
Ifit1	ENSMUSG00000034459	-0.42892	0.22603
Wisp2	ENSMUSG00000027656	-0.42872	0.23213
C230034O21Rik	ENSMUSG00000086181	-0.42872	0.21946
Aspm	ENSMUSG00000033952	-0.42836	NA
Tshz3	ENSMUSG00000021217	-0.42834	0.17211
Pex1	ENSMUSG00000005907	-0.42819	0.0062082
Gm15697	ENSMUSG00000081670	-0.4279	NA
Eml5	ENSMUSG00000051166	-0.4275	0.15591
Entpd7	ENSMUSG00000025192	-0.42735	0.11257
Gpc6	ENSMUSG00000058571	-0.42711	0.086495
Gnaq	ENSMUSG00000024639	-0.42687	0.081654
Helb	ENSMUSG00000020228	-0.42686	0.04677
Gm13716	ENSMUSG00000086905	-0.42677	0.23383
Gm26823	ENSMUSG00000096926	-0.42677	NA
Zfp719	ENSMUSG00000030469	-0.42668	0.0040015
Casr	ENSMUSG00000051980	-0.42662	NA
4930525G20Rik	ENSMUSG00000097276	-0.42654	0.19076
Fktn	ENSMUSG00000028414	-0.42642	0.060985
Syt14	ENSMUSG00000016200	-0.42612	0.23591
Nos1ap	ENSMUSG00000038473	-0.42579	0.20765
Fam126b	ENSMUSG00000038174	-0.42575	0.17986
Lyzl4	ENSMUSG00000032530	-0.42572	0.22713
Dgki	ENSMUSG00000038665	-0.42571	0.10301
Srek1	ENSMUSG00000032621	-0.42557	0.086936
Lrp8os3	ENSMUSG00000087200	-0.4253	0.17675
Gigyf2	ENSMUSG00000048000	-0.4251	0.075337
Dhx33	ENSMUSG00000040620	-0.42475	0.064472
Abca12	ENSMUSG00000050296	-0.42458	NA
Ankrd52	ENSMUSG00000014498	-0.42448	0.19443
Birc6	ENSMUSG00000024073	-0.42368	0.054527
Mms22l	ENSMUSG00000045751	-0.4234	0.20818
Ksr1	ENSMUSG00000018334	-0.42333	0.04677
Robo1	ENSMUSG00000022883	-0.4233	0.13653
Tmem178b	ENSMUSG00000057716	-0.4232	0.079232
Neurod6	ENSMUSG00000037984	-0.42287	0.0093273
Cadm1	ENSMUSG00000032076	-0.42284	0.056571
Fbln2	ENSMUSG00000064080	-0.42279	0.033831
Arnt	ENSMUSG00000015522	-0.42271	0.10054
Zfp37	ENSMUSG00000028389	-0.42233	0.085544
Slc4a8	ENSMUSG00000023032	-0.42227	0.00011766
Nhsl2	ENSMUSG00000079481	-0.42226	0.014779
Gm10501	ENSMUSG00000073415	-0.42225	0.19809
Serac1	ENSMUSG00000015659	-0.42203	0.18385
Il18bp	ENSMUSG00000070427	-0.42194	0.19517
C130071C03Rik	ENSMUSG00000050334	-0.42172	0.088271
A4galt	ENSMUSG00000047878	-0.42171	0.17877
Kif11	ENSMUSG00000012443	-0.42134	0.14934
Flrt2	ENSMUSG00000047414	-0.42124	0.074038
D330041H03Rik	ENSMUSG00000073437	-0.42101	0.23948
Peak1	ENSMUSG00000074305	-0.421	0.0098913
Ankrd63	ENSMUSG00000078137	-0.42099	0.045234
Gbp3	ENSMUSG00000028268	-0.42083	0.074554
Elk1	ENSMUSG00000009406	-0.42057	0.064472
C2cd5	ENSMUSG00000030279	-0.42011	0.030629
Nlk	ENSMUSG00000017376	-0.41988	0.041074
Dimt1	ENSMUSG00000021692	-0.41985	0.013893
Cacna1b	ENSMUSG00000004113	-0.41972	0.059226
Pde4d	ENSMUSG00000021699	-0.41947	0.2222
A830092H15Rik	ENSMUSG00000074664	-0.41912	0.24018
Dsp	ENSMUSG00000054889	-0.41881	0.078709
Dscaml1	ENSMUSG00000032087	-0.41857	0.073438
Ago2	ENSMUSG00000036698	-0.41809	0.021
Cr2	ENSMUSG00000026616	-0.41802	NA
Sacs	ENSMUSG00000048279	-0.41762	0.064472
D10Bwg1379e	ENSMUSG00000019852	-0.41733	0.24365
Dmxl2	ENSMUSG00000041268	-0.41724	0.098611
Herc2	ENSMUSG00000030451	-0.4172	0.087705
Chrd	ENSMUSG00000006958	-0.41714	0.035284
Gmnc	ENSMUSG00000068428	-0.41704	0.20931
1700020I14Rik	ENSMUSG00000085438	-0.41697	0.0059276
Car15	ENSMUSG00000090236	-0.41696	0.14189
Ect2	ENSMUSG00000027699	-0.41692	0.24606
Ptgfr	ENSMUSG00000028036	-0.41692	0.24509
Nfasc	ENSMUSG00000026442	-0.41651	0.01321
Synj1	ENSMUSG00000022973	-0.41644	0.036892
Usp33	ENSMUSG00000025437	-0.41642	0.096783
Sgcd	ENSMUSG00000020354	-0.41618	0.23566
Trim17	ENSMUSG00000036964	-0.41602	0.048052
Slco4c1	ENSMUSG00000040693	-0.41515	0.22068
Stk4	ENSMUSG00000018209	-0.41501	0.03414
Slc17a8	ENSMUSG00000019935	-0.41477	0.11296
D130043K22Rik	ENSMUSG00000006711	-0.41468	0.18321
Med14	ENSMUSG00000064127	-0.41453	0.0096088
Ndnf	ENSMUSG00000049001	-0.41451	0.18333
Appl1	ENSMUSG00000040760	-0.41449	0.041558
AU041133	ENSMUSG00000078435	-0.41439	0.22728
Slitrk1	ENSMUSG00000075478	-0.41421	0.045944
Zfp619	ENSMUSG00000068959	-0.41393	0.18277
Rapgef2	ENSMUSG00000062232	-0.41389	0.036417
Gm14698	ENSMUSG00000071748	-0.41387	NA
Chst15	ENSMUSG00000030930	-0.41379	0.006735
Nedd4l	ENSMUSG00000024589	-0.41356	0.011263
Jag1	ENSMUSG00000027276	-0.41332	0.087037
C030046E11Rik	ENSMUSG00000038658	-0.4132	0.059775
Scgb3a1	ENSMUSG00000064057	-0.41303	0.24082
2310043M15Rik	ENSMUSG00000097768	-0.41268	NA
Arel1	ENSMUSG00000042350	-0.41265	0.16777
Scd4	ENSMUSG00000050195	-0.41264	0.25
Wdr19	ENSMUSG00000037890	-0.4124	0.078848
Galnt15	ENSMUSG00000021903	-0.41233	0.18732
Tspyl5	ENSMUSG00000038984	-0.41216	0.01586
Gcc2	ENSMUSG00000038039	-0.41191	0.024089
Etl4	ENSMUSG00000036617	-0.41149	0.014514
Oxsm	ENSMUSG00000021786	-0.41147	0.11399
Mtr	ENSMUSG00000021311	-0.41141	0.25016
C4a	ENSMUSG00000015451	-0.41132	0.25516
Ksr2	ENSMUSG00000061578	-0.41112	0.087336
Agtpbp1	ENSMUSG00000021557	-0.41098	0.037459
Grip1	ENSMUSG00000034813	-0.4108	0.0669
Ikzf2	ENSMUSG00000025997	-0.41076	0.11572
Ly6a	ENSMUSG00000075602	-0.41063	0.17705
Sema3c	ENSMUSG00000028780	-0.41043	0.079322
Phf20	ENSMUSG00000038116	-0.41031	0.063051
Zfp933	ENSMUSG00000059423	-0.40985	0.014129
Ell3	ENSMUSG00000027246	-0.40941	NA
Prr14l	ENSMUSG00000054280	-0.40904	0.010195
Slc24a2	ENSMUSG00000037996	-0.40901	0.032993
Tshz2	ENSMUSG00000047907	-0.40887	0.20661
Wnt9a	ENSMUSG00000000126	-0.40879	0.095544
Kdelc1	ENSMUSG00000026047	-0.40832	0.11754
Jrk	ENSMUSG00000046380	-0.40825	0.025631
Cntn3	ENSMUSG00000030075	-0.40799	0.11754
Dok6	ENSMUSG00000073514	-0.40795	0.25947
Zbed6	ENSMUSG00000094410	-0.40767	0.079187
Add2	ENSMUSG00000030000	-0.40751	0.24924
Usp28	ENSMUSG00000032267	-0.40725	0.11229
Pcdhb5	ENSMUSG00000063687	-0.40672	0.074038
Oasl1	ENSMUSG00000041827	-0.40669	NA
Clip1	ENSMUSG00000049550	-0.40661	0.069574
Zfp69	ENSMUSG00000064141	-0.40658	0.24733
Slc38a11	ENSMUSG00000061171	-0.40652	0.21134
Gm14290	ENSMUSG00000086605	-0.4065	0.087783
Tmem169	ENSMUSG00000026188	-0.40614	0.13911
Zfp551	ENSMUSG00000034071	-0.40614	0.25241
Pds5b	ENSMUSG00000034021	-0.40582	0.04537
Bbx	ENSMUSG00000022641	-0.40574	0.068348
Tmem140	ENSMUSG00000057137	-0.40557	0.25625
Fam65c	ENSMUSG00000074577	-0.40541	0.26081
Synj2bp	ENSMUSG00000090935	-0.4052	0.0027008
4930503L19Rik	ENSMUSG00000044906	-0.40519	0.20657
Gm4477	ENSMUSG00000089694	-0.40512	NA
Clec16a	ENSMUSG00000068663	-0.40508	0.037787
Cdc25c	ENSMUSG00000044201	-0.4048	NA
Zfp382	ENSMUSG00000074220	-0.40472	0.18836
Pla2g4a	ENSMUSG00000056220	-0.40465	0.2096
Ampd3	ENSMUSG00000005686	-0.40461	0.070431
Slitrk3	ENSMUSG00000048304	-0.40457	0.21923
Cog5	ENSMUSG00000035933	-0.40449	0.15411
Gucy1b2	ENSMUSG00000021933	-0.40414	0.26142
Sema3a	ENSMUSG00000028883	-0.40393	0.22948
Akap9	ENSMUSG00000040407	-0.40386	0.1107
4930448E22Rik	ENSMUSG00000097463	-0.40384	NA
Scn8a	ENSMUSG00000023033	-0.4038	0.012832
Krtcap3	ENSMUSG00000029149	-0.40373	0.16107
Slc4a7	ENSMUSG00000021733	-0.40325	0.11989
Wdr7	ENSMUSG00000040560	-0.40313	0.052971
Naip5	ENSMUSG00000071203	-0.40306	0.2477
Gpr17	ENSMUSG00000052229	-0.40294	0.028904
Alox12	ENSMUSG00000000320	-0.40291	0.25516
Pnmal1	ENSMUSG00000041141	-0.40277	0.21838
Ttf1	ENSMUSG00000026803	-0.4026	0.1597
9430020K01Rik	ENSMUSG00000033960	-0.40249	0.066289
Ppm1h	ENSMUSG00000034613	-0.40246	0.0043276
Kcnh1	ENSMUSG00000058248	-0.40244	0.17164
Pkd2l2	ENSMUSG00000014503	-0.40232	0.031469
Nrp2	ENSMUSG00000025969	-0.40213	0.11754
C530008M17Rik	ENSMUSG00000036377	-0.402	0.14621
Man1a	ENSMUSG00000003746	-0.40179	0.097934
Prkag2	ENSMUSG00000028944	-0.40177	0.0080677
BC106179	ENSMUSG00000045231	-0.40153	NA
Samd9l	ENSMUSG00000047735	-0.40152	0.23174
Wdr59	ENSMUSG00000031959	-0.40118	0.018892
Gm8034	ENSMUSG00000094281	-0.40094	NA
Senp8	ENSMUSG00000051705	-0.40093	0.060906
Pvrl3	ENSMUSG00000022656	-0.40087	0.068176
Grm8	ENSMUSG00000024211	-0.40085	0.16394
Raph1	ENSMUSG00000026014	-0.40079	0.0033371
Nav2	ENSMUSG00000052512	-0.40077	0.11707
Dock11	ENSMUSG00000031093	-0.40067	0.1364
Rbm41	ENSMUSG00000031433	-0.40047	0.26554
Pde5a	ENSMUSG00000053965	-0.40031	0.042688
Aldh1a7	ENSMUSG00000024747	-0.4003	NA
Dgkb	ENSMUSG00000036095	-0.40013	0.23491
Tspyl3	ENSMUSG00000074671	-0.39997	0.0098913
Gm4787	ENSMUSG00000072974	-0.39996	NA
Xpnpep3	ENSMUSG00000022401	-0.39993	0.23591
Pdzd9	ENSMUSG00000030887	-0.39966	NA
Gm4450	ENSMUSG00000090817	-0.39919	NA
Iqcc	ENSMUSG00000040795	-0.39918	0.0069753
Plxna2	ENSMUSG00000026640	-0.39914	0.1054
Amer1	ENSMUSG00000050332	-0.39905	0.13133
Hook3	ENSMUSG00000037234	-0.399	0.061517
Apbb1ip	ENSMUSG00000026786	-0.39899	0.021731
Fbn1	ENSMUSG00000027204	-0.39895	0.17846
Dusp19	ENSMUSG00000027001	-0.39889	0.17422
Nkain3	ENSMUSG00000055761	-0.3987	0.093817
Cstf2	ENSMUSG00000031256	-0.39863	0.15686
Gm9945	ENSMUSG00000054450	-0.39826	NA
Chl1	ENSMUSG00000030077	-0.39808	0.068133
Gm9955	ENSMUSG00000054745	-0.3977	NA
Zfp941	ENSMUSG00000060314	-0.39766	0.066526
Ercc6	ENSMUSG00000054051	-0.39746	0.14299
B3gnt8	ENSMUSG00000059479	-0.39725	0.20661
Dip2c	ENSMUSG00000048264	-0.39723	0.097836
Usp13	ENSMUSG00000056900	-0.39682	0.00031788
St6gal2	ENSMUSG00000024172	-0.39681	0.17675
Ttbk2	ENSMUSG00000090100	-0.39681	0.014638
Pcdhb2	ENSMUSG00000051599	-0.39679	0.27219
Slc16a7	ENSMUSG00000020102	-0.39674	0.17031
Elfn1	ENSMUSG00000048988	-0.3967	0.065723
Gm9833	ENSMUSG00000049230	-0.39662	0.26704
Rock2	ENSMUSG00000020580	-0.39633	0.0057747
Nos1	ENSMUSG00000029361	-0.39633	0.037338
Ccdc66	ENSMUSG00000046753	-0.39599	0.18212
Slitrk4	ENSMUSG00000046699	-0.39553	0.13894
RP24-439I22.1	ENSMUSG00000100826	-0.39552	0.12353
Alkbh8	ENSMUSG00000025899	-0.39546	0.26487
A230046K03Rik	ENSMUSG00000034560	-0.39534	0.20359
Gm13420	ENSMUSG00000079497	-0.39531	NA
Arntl2	ENSMUSG00000040187	-0.3952	0.11104
Usp50	ENSMUSG00000027364	-0.3951	0.23297
Hs3st2	ENSMUSG00000046321	-0.39505	0.044542
Gm15535	ENSMUSG00000085527	-0.39504	0.2748
Itga9	ENSMUSG00000039115	-0.39492	0.10393
Gm26673	ENSMUSG00000097596	-0.39484	0.2656
Usp15	ENSMUSG00000020124	-0.3948	0.15215
Gm17296	ENSMUSG00000090290	-0.39465	0.20558
1190002N15Rik	ENSMUSG00000045414	-0.3945	0.073117
St8sia3os	ENSMUSG00000086128	-0.3945	0.19076
Lats2	ENSMUSG00000021959	-0.39445	0.14137
Cenpq	ENSMUSG00000023919	-0.39443	0.1077
Tmtc1	ENSMUSG00000030306	-0.39383	0.099259
Dgat2l6	ENSMUSG00000067597	-0.39358	NA
Wdr44	ENSMUSG00000036769	-0.39347	0.1805
Fndc1	ENSMUSG00000071984	-0.39332	0.13653
Btaf1	ENSMUSG00000040565	-0.39329	0.11637
Pdpk1	ENSMUSG00000024122	-0.39325	0.14787
Hnrnph1	ENSMUSG00000007850	-0.39324	0.00042161
Ryr2	ENSMUSG00000021313	-0.3931	0.19657
Kdm6a	ENSMUSG00000037369	-0.39302	0.19016
Mst1r	ENSMUSG00000032584	-0.39289	0.20104
Sass6	ENSMUSG00000027959	-0.39286	0.079258
Gm608	ENSMUSG00000068284	-0.39261	0.067191
Tacr3	ENSMUSG00000028172	-0.39255	0.26664
Cep170	ENSMUSG00000057335	-0.39248	0.13189
A930011O12Rik	ENSMUSG00000097545	-0.39203	0.22718
4932438A13Rik	ENSMUSG00000037270	-0.39194	0.1446
Hspa4	ENSMUSG00000020361	-0.39176	0.0014592
Prrc2c	ENSMUSG00000040225	-0.39164	0.057745
Fbxw7	ENSMUSG00000028086	-0.39147	0.012832
Rapgef5	ENSMUSG00000041992	-0.39142	0.26396
Map1b	ENSMUSG00000052727	-0.3913	0.00016768
Itga4	ENSMUSG00000027009	-0.39128	0.16618
Zfp738	ENSMUSG00000048280	-0.39106	0.073483
Ralyl	ENSMUSG00000096025	-0.39105	0.22948
Prkab2	ENSMUSG00000038205	-0.39047	0.065315
Hivep2	ENSMUSG00000015501	-0.39043	0.10032
Asap1	ENSMUSG00000022377	-0.39018	0.04155
Bmpr2	ENSMUSG00000067336	-0.39006	0.00018466
Mllt4	ENSMUSG00000068036	-0.39005	0.17422
Antxr2	ENSMUSG00000029338	-0.39004	0.1597
Gm10658	ENSMUSG00000074284	-0.39	NA
Gprin3	ENSMUSG00000045441	-0.38997	0.25941
Ank3	ENSMUSG00000069601	-0.3897	0.05457
Ephx3	ENSMUSG00000037577	-0.38969	NA
Tpp2	ENSMUSG00000041763	-0.38963	0.025845
Kpna1	ENSMUSG00000022905	-0.38955	0.0038327
Grpr	ENSMUSG00000031364	-0.38932	NA
Gm13524	ENSMUSG00000085397	-0.38929	NA
Hist1h4j	ENSMUSG00000067455	-0.38889	0.28269
Lcp2	ENSMUSG00000002699	-0.38872	0.23234
Nup98	ENSMUSG00000063550	-0.38869	0.23641
Sez6l	ENSMUSG00000058153	-0.38867	0.068871
Zfp74	ENSMUSG00000059975	-0.38852	0.10657
Dpp8	ENSMUSG00000032393	-0.3885	0.25941
Cnr1	ENSMUSG00000044288	-0.38841	0.15499
Zbp1	ENSMUSG00000027514	-0.388	NA
Rbm6	ENSMUSG00000032582	-0.38779	0.0029944
Lmtk2	ENSMUSG00000038970	-0.38736	0.0019
Lhx6	ENSMUSG00000026890	-0.38734	0.084764
Sost	ENSMUSG00000001494	-0.38728	NA
Shroom4	ENSMUSG00000068270	-0.38701	0.12385
Ppm1l	ENSMUSG00000027784	-0.38699	0.0057747
Ltn1	ENSMUSG00000052299	-0.38684	0.059775
Lpin3	ENSMUSG00000027412	-0.38676	0.16255
Gm17096	ENSMUSG00000090397	-0.38625	NA
Tmem245	ENSMUSG00000055296	-0.38617	0.083597
Atp2a2	ENSMUSG00000029467	-0.38597	0.067239
Gm5113	ENSMUSG00000066647	-0.3858	0.26495
Kcnq2	ENSMUSG00000016346	-0.38579	0.017718
Fgf10	ENSMUSG00000021732	-0.38577	0.052144
Sox5	ENSMUSG00000041540	-0.38572	0.10342
Chd2	ENSMUSG00000078671	-0.3856	0.043937
Nktr	ENSMUSG00000032525	-0.38559	0.052891
Klk5	ENSMUSG00000074155	-0.38533	NA
Gabpa	ENSMUSG00000008976	-0.38509	0.058745
Ankrd22	ENSMUSG00000024774	-0.38508	NA
Dtx3l	ENSMUSG00000049502	-0.38502	0.084115
Map3k5	ENSMUSG00000071369	-0.38488	0.0045757
Tnrc6b	ENSMUSG00000047888	-0.38473	0.058678
Trim14	ENSMUSG00000039853	-0.38445	0.28768
Lonrf2	ENSMUSG00000048814	-0.38436	0.00043985
Pde4dip	ENSMUSG00000038170	-0.38434	0.097461
Klhl24	ENSMUSG00000062901	-0.38421	0.20086
Myo9a	ENSMUSG00000039585	-0.38411	0.062109
Gm12404	ENSMUSG00000087623	-0.38389	NA
Plb1	ENSMUSG00000029134	-0.38369	0.12928
Scn2a1	ENSMUSG00000075318	-0.38369	0.070675
Zfp809	ENSMUSG00000057982	-0.38356	0.036303
Arid2	ENSMUSG00000033237	-0.38355	0.15325
Ankrd45	ENSMUSG00000044835	-0.38344	0.28166
Prkce	ENSMUSG00000045038	-0.38342	0.11889
Edn3	ENSMUSG00000027524	-0.38338	0.13133
Uhrf2	ENSMUSG00000024817	-0.38325	0.091072
Mlh3	ENSMUSG00000021245	-0.38314	0.0037979
Kit	ENSMUSG00000005672	-0.38307	0.060663
B130055M24Rik	ENSMUSG00000086502	-0.38302	0.2902
Atp10a	ENSMUSG00000025324	-0.3828	0.11838
Lama4	ENSMUSG00000019846	-0.38278	0.12062
Esyt3	ENSMUSG00000037681	-0.38278	0.28444
Zfp759	ENSMUSG00000057396	-0.38249	0.14675
Gm26653	ENSMUSG00000097496	-0.38245	0.28085
Mettl4	ENSMUSG00000055660	-0.3823	0.20665
Slc39a2	ENSMUSG00000072572	-0.38226	0.27869
B430305J03Rik	ENSMUSG00000053706	-0.38219	0.2915
Gm20457	ENSMUSG00000092187	-0.38216	0.19523
Trpc4	ENSMUSG00000027748	-0.38205	0.052803
Spice1	ENSMUSG00000043065	-0.38201	0.009679
Stxbp4	ENSMUSG00000020546	-0.38196	0.13653
Zfp532	ENSMUSG00000042439	-0.38182	0.062691
Sgsm1	ENSMUSG00000042216	-0.38176	0.031992
5830418K08Rik	ENSMUSG00000046111	-0.38173	0.12778
Gm9752	ENSMUSG00000025450	-0.38152	0.2915
Trappc8	ENSMUSG00000033382	-0.38136	0.16358
Taco1	ENSMUSG00000001983	-0.38082	0.075685
Gm1043	ENSMUSG00000070823	-0.38079	0.29295
Fcer2a	ENSMUSG00000005540	-0.38075	0.27934
Dhx9	ENSMUSG00000042699	-0.38072	0.12588
RP23-402K24.5	ENSMUSG00000100214	-0.38024	0.20984
Trio	ENSMUSG00000022263	-0.38008	0.044123
6820431F20Rik	ENSMUSG00000071796	-0.38003	0.14091
Naalad2	ENSMUSG00000043943	-0.37991	0.23195
Cadps	ENSMUSG00000054423	-0.37991	0.045234
B4galnt3	ENSMUSG00000041372	-0.37984	0.29471
Hspa5	ENSMUSG00000026864	-0.3798	0.043366
Bicd1	ENSMUSG00000003452	-0.37962	0.055488
Sp140	ENSMUSG00000070031	-0.37952	0.28986
Ankrd12	ENSMUSG00000034647	-0.3795	0.056491
Smap1	ENSMUSG00000026155	-0.37937	0.22001
Rpe	ENSMUSG00000026005	-0.37935	0.13138
Miat	ENSMUSG00000097767	-0.37911	0.2223
Rprd1a	ENSMUSG00000040446	-0.37889	0.18365
Klf8	ENSMUSG00000041649	-0.37863	0.28794
Supt20	ENSMUSG00000027751	-0.37843	0.19633
Ascc3	ENSMUSG00000038774	-0.37824	0.19946
Gm11100	ENSMUSG00000079357	-0.37815	NA
Fam83g	ENSMUSG00000042377	-0.37813	NA
Mettl16	ENSMUSG00000010554	-0.37812	4.9005e-05
Palm2	ENSMUSG00000090053	-0.37794	0.282
Zfp174	ENSMUSG00000054939	-0.37788	0.14888
Ndst4	ENSMUSG00000027971	-0.37779	0.26704
Gtpbp2	ENSMUSG00000023952	-0.37774	0.0059276
Tbc1d4	ENSMUSG00000033083	-0.37771	0.11789
Gm15726	ENSMUSG00000087263	-0.37755	NA
Sulf2	ENSMUSG00000006800	-0.37749	0.05143
Lnp	ENSMUSG00000009207	-0.37747	0.066306
Asap2	ENSMUSG00000052632	-0.37724	0.079725
Hrk	ENSMUSG00000046607	-0.37723	0.03414
Mrap	ENSMUSG00000039956	-0.37722	0.29771
Akap13	ENSMUSG00000066406	-0.37712	0.18967
Specc1	ENSMUSG00000042331	-0.37681	0.00042881
Pbrm1	ENSMUSG00000042323	-0.3768	0.13492
Scn2b	ENSMUSG00000070304	-0.3768	0.009749
Alx4	ENSMUSG00000040310	-0.37675	0.28199
Serpinb8	ENSMUSG00000026315	-0.37644	0.21891
Fam214a	ENSMUSG00000034858	-0.37639	0.11323
Prickle2	ENSMUSG00000030020	-0.37607	0.14595
Peg10	ENSMUSG00000092035	-0.37594	0.029083
Bcl3	ENSMUSG00000053175	-0.37533	0.29938
Rasgrf2	ENSMUSG00000021708	-0.37522	0.084856
Gm16105	ENSMUSG00000084849	-0.37514	NA
Clec14a	ENSMUSG00000045930	-0.37511	0.24606
Pot1b	ENSMUSG00000024174	-0.3751	0.068803
Tnn	ENSMUSG00000026725	-0.3751	NA
D030055H07Rik	ENSMUSG00000086296	-0.37495	NA
Sv2b	ENSMUSG00000053025	-0.37473	0.093817
Csmd1	ENSMUSG00000060924	-0.3746	0.23213
Ppp4r4	ENSMUSG00000021209	-0.37455	0.00085248
Ankrd17	ENSMUSG00000055204	-0.37442	0.099859
Trank1	ENSMUSG00000062296	-0.37437	0.17331
Mcemp1	ENSMUSG00000013974	-0.37421	NA
Arl15	ENSMUSG00000042348	-0.37415	0.059775
Cacna1i	ENSMUSG00000022416	-0.37402	0.060544
Fam83c	ENSMUSG00000074647	-0.37402	NA
Nxph3	ENSMUSG00000046719	-0.37365	0.17504
Spata9	ENSMUSG00000021590	-0.37346	0.25897
Gm16268	ENSMUSG00000089959	-0.37342	0.26444
Skida1	ENSMUSG00000054074	-0.37322	0.040049
Wnk3	ENSMUSG00000041245	-0.37313	0.054765
St8sia1	ENSMUSG00000030283	-0.37308	0.082143
Cdh8	ENSMUSG00000036510	-0.37302	0.13739
Epha4	ENSMUSG00000026235	-0.37289	0.18538
Vkorc1l1	ENSMUSG00000066735	-0.37281	0.19414
Reln	ENSMUSG00000042453	-0.37278	0.099962
Hectd1	ENSMUSG00000035247	-0.37261	0.13147
Rimbp3	ENSMUSG00000071636	-0.37246	0.22603
Ift80	ENSMUSG00000027778	-0.37243	0.13865
Mettl21c	ENSMUSG00000047343	-0.37234	NA
A630007B06Rik	ENSMUSG00000035173	-0.37203	0.0026797
2410089E03Rik	ENSMUSG00000039801	-0.37183	0.049218
Cobl	ENSMUSG00000020173	-0.37161	0.13386
Kif16bos	ENSMUSG00000086504	-0.37136	NA
Kremen2	ENSMUSG00000040680	-0.37134	0.29848
Gm10805	ENSMUSG00000075036	-0.3713	NA
Gimap8	ENSMUSG00000064262	-0.37116	0.2776
Vps13c	ENSMUSG00000035284	-0.37108	0.30038
Mettl3	ENSMUSG00000022160	-0.37101	0.079258
2900072N19Rik	ENSMUSG00000087018	-0.37087	0.30338
Lrrc55	ENSMUSG00000075224	-0.37085	0.30833
Grm2	ENSMUSG00000023192	-0.37081	0.043366
Zfpm2	ENSMUSG00000022306	-0.37079	0.16128
Doc2b	ENSMUSG00000020848	-0.37075	0.091651
Ntrk3	ENSMUSG00000059146	-0.37069	0.25909
Atxn7l1	ENSMUSG00000020564	-0.37065	0.032555
Usp32	ENSMUSG00000000804	-0.37053	0.11755
Eri1	ENSMUSG00000031527	-0.37044	0.020316
Gm16339	ENSMUSG00000090050	-0.37041	0.27522
Slc9a7	ENSMUSG00000037341	-0.37029	0.30833
Unc13a	ENSMUSG00000034799	-0.37001	0.071965
Zc3h13	ENSMUSG00000022000	-0.37	0.079732
Gm1141	ENSMUSG00000073130	-0.36975	NA
Map4k3	ENSMUSG00000024242	-0.36967	0.17528
Rassf10	ENSMUSG00000098132	-0.36959	0.18604
Nrxn1	ENSMUSG00000024109	-0.36944	0.081877
Ptx4	ENSMUSG00000044172	-0.36941	0.31017
Ptk2	ENSMUSG00000022607	-0.36931	0.0029944
Magi2	ENSMUSG00000040003	-0.3692	0.16255
Gm13713	ENSMUSG00000085135	-0.36903	NA
Gm14412	ENSMUSG00000078868	-0.369	0.29741
Lcor	ENSMUSG00000025019	-0.36897	0.29789
Gm2420	ENSMUSG00000082305	-0.36878	0.30197
Sgtb	ENSMUSG00000042743	-0.36873	0.16618
Cblb	ENSMUSG00000022637	-0.3687	0.1673
Sorcs2	ENSMUSG00000029093	-0.36869	0.0016177
Ttc30b	ENSMUSG00000075273	-0.36853	0.079322
Dusp11	ENSMUSG00000030002	-0.36837	0.065767
Epm2aip1	ENSMUSG00000046785	-0.36824	0.044277
Snap91	ENSMUSG00000033419	-0.3682	0.064472
Aak1	ENSMUSG00000057230	-0.36802	0.045738
Kif3a	ENSMUSG00000018395	-0.36801	0.082461
Ccdc18	ENSMUSG00000056531	-0.36785	0.29955
Neto1	ENSMUSG00000050321	-0.36781	0.22718
Ccbe1	ENSMUSG00000046318	-0.36765	0.12079
Soga3	ENSMUSG00000038916	-0.36761	0.18342
Chst9	ENSMUSG00000047161	-0.36755	0.20597
Clstn2	ENSMUSG00000032452	-0.36754	0.014157
Prex2	ENSMUSG00000048960	-0.36719	0.20533
Hist1h1e	ENSMUSG00000051627	-0.36719	0.31335
Abcb6	ENSMUSG00000026198	-0.367	NA
Top1	ENSMUSG00000070544	-0.36699	0.079893
C2cd3	ENSMUSG00000047248	-0.36687	0.11074
Kbtbd7	ENSMUSG00000043881	-0.36684	0.1247
Csf3r	ENSMUSG00000028859	-0.36681	0.11113
Spn	ENSMUSG00000051457	-0.36681	0.21947
Mmp28	ENSMUSG00000020682	-0.36665	0.20245
Xpr1	ENSMUSG00000026469	-0.36657	0.038597
Cad	ENSMUSG00000013629	-0.36643	0.010384
A830073O21Rik	ENSMUSG00000091890	-0.36642	NA
Dapk1	ENSMUSG00000021559	-0.36611	0.10793
Gnptab	ENSMUSG00000035311	-0.3656	0.14271
Perm1	ENSMUSG00000078486	-0.36552	0.12899
Exoc4	ENSMUSG00000029763	-0.3655	0.027063
Cmip	ENSMUSG00000034390	-0.36549	0.18277
Htr1f	ENSMUSG00000050783	-0.36531	0.27436
Necab1	ENSMUSG00000040536	-0.3653	0.27044
Ubr1	ENSMUSG00000027272	-0.36519	0.11122
Gm26587	ENSMUSG00000097470	-0.36502	0.2656
5330417C22Rik	ENSMUSG00000040412	-0.36488	0.0032094
Zfp937	ENSMUSG00000060336	-0.36485	0.23237
Unc79	ENSMUSG00000021198	-0.36482	0.15714
Arid1b	ENSMUSG00000069729	-0.36474	0.094935
2004-03-01	ENSMUSG00000039372	-0.36432	0.048157
Tcf20	ENSMUSG00000041852	-0.36427	0.11447
Txlng	ENSMUSG00000038344	-0.36403	0.074038
Pcmtd1	ENSMUSG00000051285	-0.36387	0.035636
Srbd1	ENSMUSG00000024135	-0.36356	0.0080344
Hdlbp	ENSMUSG00000034088	-0.36342	0.0082947
A430105I19Rik	ENSMUSG00000045838	-0.3634	0.058234
Zfp930	ENSMUSG00000059897	-0.3633	0.29944
Ahcyl2	ENSMUSG00000029772	-0.36325	0.094664
D3Ertd254e	ENSMUSG00000033883	-0.36323	0.084115
Fam65b	ENSMUSG00000036006	-0.36297	0.068133
Efr3a	ENSMUSG00000015002	-0.36277	1.7169e-05
Abcb10	ENSMUSG00000031974	-0.36273	0.0066791
Tmem67	ENSMUSG00000049488	-0.3627	0.18786
Uggt2	ENSMUSG00000042104	-0.36268	0.20144
Celf5	ENSMUSG00000034818	-0.36249	0.058024
Dkc1	ENSMUSG00000031403	-0.36218	0.16769
Lpar4	ENSMUSG00000049929	-0.36215	0.26664
Rev3l	ENSMUSG00000019841	-0.36205	0.20583
Gm16998	ENSMUSG00000097069	-0.36198	NA
Klhl11	ENSMUSG00000048732	-0.36187	0.32106
Vmn2r29	ENSMUSG00000095730	-0.36184	NA
Paqr9	ENSMUSG00000064225	-0.3618	0.00032497
Csmd2	ENSMUSG00000028804	-0.36179	0.25128
Aoc3	ENSMUSG00000019326	-0.36173	0.27032
3110035E14Rik	ENSMUSG00000067879	-0.36173	0.017257
Slitrk5	ENSMUSG00000033214	-0.36172	0.10059
Ash1l	ENSMUSG00000028053	-0.36151	0.20093
Naa25	ENSMUSG00000042719	-0.36147	0.2798
C77370	ENSMUSG00000046449	-0.36144	0.24399
Zfp85os	ENSMUSG00000044081	-0.36139	0.15276
Ascl1	ENSMUSG00000020052	-0.36137	0.072955
Suv39h2	ENSMUSG00000026646	-0.36124	0.079322
4931403E22Rik	ENSMUSG00000093772	-0.36121	NA
Camta1	ENSMUSG00000014592	-0.3612	0.067911
Cntnap5b	ENSMUSG00000067028	-0.36115	0.31145
Pkdrej	ENSMUSG00000052496	-0.36106	0.29191
Akap6	ENSMUSG00000061603	-0.36102	0.10033
Dlgap2	ENSMUSG00000047495	-0.36095	0.29783
A230056P14Rik	ENSMUSG00000087178	-0.36086	0.28311
Pde1a	ENSMUSG00000059173	-0.36085	0.11726
4732463B04Rik	ENSMUSG00000097762	-0.36078	0.32191
Trip11	ENSMUSG00000021188	-0.36077	0.15261
Cdc40	ENSMUSG00000038446	-0.36069	0.064264
Gm14420	ENSMUSG00000078866	-0.36054	0.20268
Chst11	ENSMUSG00000034612	-0.36041	0.068616
Strip2	ENSMUSG00000039629	-0.3604	0.19979
Fam180a	ENSMUSG00000047420	-0.36035	0.32354
Man1a2	ENSMUSG00000008763	-0.36001	0.081959
Pogz	ENSMUSG00000038902	-0.35999	0.0083814
Aqr	ENSMUSG00000040383	-0.35999	0.014682
Zfp626	ENSMUSG00000030604	-0.3599	0.30888
Itpr1	ENSMUSG00000030102	-0.35988	0.21055
Efr3b	ENSMUSG00000020658	-0.35984	0.060945
Pcdha10	ENSMUSG00000007440	-0.35972	0.1198
Amigo2	ENSMUSG00000048218	-0.3596	0.057321
Cdk3-ps	ENSMUSG00000092300	-0.35942	0.32354
Tab3	ENSMUSG00000035476	-0.35937	0.11113
Huwe1	ENSMUSG00000025261	-0.35933	0.15974
Shank2	ENSMUSG00000037541	-0.35931	0.21339
Klhl7	ENSMUSG00000028986	-0.35923	0.10687
Tmem63c	ENSMUSG00000034145	-0.35922	0.18161
9830144P21Rik	ENSMUSG00000087528	-0.3592	0.32585
Sipa1l3	ENSMUSG00000030583	-0.35916	0.088492
Tbc1d8b	ENSMUSG00000042473	-0.35913	0.32585
Cspp1	ENSMUSG00000056763	-0.35912	0.12857
Rbm33	ENSMUSG00000048271	-0.3591	0.069161
Nt5dc3	ENSMUSG00000054027	-0.35903	0.021605
Cenpc1	ENSMUSG00000029253	-0.35893	0.15499
Alox12b	ENSMUSG00000032807	-0.35881	0.12928
Vps13d	ENSMUSG00000020220	-0.3586	0.081518
Morc2b	ENSMUSG00000048602	-0.35856	0.28857
Herc6	ENSMUSG00000029798	-0.35827	0.17166
Troap	ENSMUSG00000032783	-0.35804	NA
Thsd7b	ENSMUSG00000042581	-0.35798	0.15206
Tbc1d32	ENSMUSG00000038122	-0.35795	0.22357
Oxr1	ENSMUSG00000022307	-0.35793	0.15561
Ylpm1	ENSMUSG00000021244	-0.35782	0.15864
Rgs9	ENSMUSG00000020599	-0.35771	0.0636
Prpf4b	ENSMUSG00000021413	-0.3576	0.13357
Cep57l1	ENSMUSG00000019813	-0.35743	0.094653
Trp53bp1	ENSMUSG00000043909	-0.35743	0.11074
Zfp109	ENSMUSG00000074283	-0.35741	0.32866
Degs2	ENSMUSG00000021263	-0.35739	0.087586
Ar	ENSMUSG00000046532	-0.35724	0.012267
Kmt2d	ENSMUSG00000048154	-0.35724	0.18605
Kdm2b	ENSMUSG00000029475	-0.35712	0.15623
Adcy3	ENSMUSG00000020654	-0.357	0.23278
Gm14448	ENSMUSG00000080186	-0.35699	NA
Postn	ENSMUSG00000027750	-0.35696	0.31684
Bglap3	ENSMUSG00000074489	-0.35696	0.27416
Tpx2	ENSMUSG00000027469	-0.35694	0.12438
Frmpd4	ENSMUSG00000049176	-0.35685	0.17624
Mkl1	ENSMUSG00000042292	-0.35681	0.10385
Erc1	ENSMUSG00000030172	-0.35677	0.04795
Dgkg	ENSMUSG00000022861	-0.35674	0.32493
Clasp2	ENSMUSG00000033392	-0.35657	0.068811
Cep83	ENSMUSG00000020024	-0.35656	0.1093
Ppp2r5e	ENSMUSG00000021051	-0.3564	0.13357
Dcx	ENSMUSG00000031285	-0.35633	0.095544
Slfn9	ENSMUSG00000069793	-0.35623	NA
Npy1r	ENSMUSG00000036437	-0.3562	0.10156
Fgf11	ENSMUSG00000042826	-0.35615	0.057797
Zfp459	ENSMUSG00000055560	-0.35601	0.27268
Dopey1	ENSMUSG00000034973	-0.35598	0.13912
Kcna1	ENSMUSG00000047976	-0.35592	0.025764
Unc13b	ENSMUSG00000028456	-0.35588	0.11284
Tubgcp6	ENSMUSG00000051786	-0.35583	0.26215
Myh10	ENSMUSG00000020900	-0.35577	0.11789
Zfp871	ENSMUSG00000024298	-0.35572	0.29516
Usp25	ENSMUSG00000022867	-0.35569	0.191
Lcmt2	ENSMUSG00000074890	-0.35567	0.11617
Slc5a3	ENSMUSG00000089774	-0.35567	0.092545
Pkn3	ENSMUSG00000026785	-0.35563	0.26698
Dmxl1	ENSMUSG00000037416	-0.35557	0.2368
Stard4	ENSMUSG00000024378	-0.35555	0.073852
Kdm5d	ENSMUSG00000056673	-0.35555	0.15901
Adcy6	ENSMUSG00000022994	-0.35552	0.25046
Plxna3	ENSMUSG00000031398	-0.35521	0.028361
Srsf10	ENSMUSG00000028676	-0.35512	0.0083441
Malat1	ENSMUSG00000092341	-0.3549	0.058219
Apol8	ENSMUSG00000056656	-0.35484	0.064529
Samsn1	ENSMUSG00000022876	-0.35483	0.2339
Ptprz1	ENSMUSG00000068748	-0.35481	0.23814
Zfr	ENSMUSG00000022201	-0.3546	0.1054
Cdca8	ENSMUSG00000028873	-0.35453	0.23591
Pdcl	ENSMUSG00000009030	-0.35449	0.056491
Snx25	ENSMUSG00000038291	-0.35442	0.021585
Azin1	ENSMUSG00000037458	-0.35438	0.061639
Man2a1	ENSMUSG00000024085	-0.3541	0.13133
Ikbkb	ENSMUSG00000031537	-0.35405	0.00056504
Zfp518b	ENSMUSG00000046572	-0.35394	0.13065
Dst	ENSMUSG00000026131	-0.35382	0.16447
Hlx	ENSMUSG00000039377	-0.35378	0.30027
BC025920	ENSMUSG00000074862	-0.35374	0.33204
AI504432	ENSMUSG00000056145	-0.35371	0.19733
Rb1cc1	ENSMUSG00000025907	-0.35351	0.13558
Flrt3	ENSMUSG00000051379	-0.35349	0.20098
Igsf9b	ENSMUSG00000034275	-0.35337	0.31066
Fam120b	ENSMUSG00000014763	-0.35332	0.07005
Luzp1	ENSMUSG00000001089	-0.35314	0.024091
Rangrf	ENSMUSG00000032892	-0.35292	NA
Cpsf4l	ENSMUSG00000018727	-0.35286	0.33605
Zfp712	ENSMUSG00000090641	-0.35277	0.17275
Gm12212	ENSMUSG00000085707	-0.35259	NA
Tenm3	ENSMUSG00000031561	-0.35257	0.27529
Csrnp3	ENSMUSG00000044647	-0.35239	0.058096
Lztfl1	ENSMUSG00000025245	-0.35228	0.075239
Pik3cb	ENSMUSG00000032462	-0.3522	0.050757
Ptgdr	ENSMUSG00000071489	-0.3522	NA
Fn1	ENSMUSG00000026193	-0.35207	0.086293
Ly75	ENSMUSG00000026980	-0.35185	0.2633
Zdhhc2	ENSMUSG00000039470	-0.35174	0.00069842
Mis18bp1	ENSMUSG00000047534	-0.35173	0.33109
Scn3b	ENSMUSG00000049281	-0.3515	0.047638
Krr1	ENSMUSG00000063334	-0.3515	0.058036
Oxtr	ENSMUSG00000049112	-0.35143	0.13559
Mmachc	ENSMUSG00000028690	-0.3514	0.00025748
Ankrd29	ENSMUSG00000057766	-0.35124	0.06659
Prx	ENSMUSG00000053198	-0.35112	0.26698
Epha5	ENSMUSG00000029245	-0.35091	0.14146
Lphn3	ENSMUSG00000037605	-0.35072	0.23724
Ccdc88a	ENSMUSG00000032740	-0.35071	0.22098
Paxip1	ENSMUSG00000002221	-0.35064	0.087766
Lyst	ENSMUSG00000019726	-0.35058	0.33418
Usp34	ENSMUSG00000056342	-0.35055	0.30806
Pisd-ps2	ENSMUSG00000023795	-0.3504	0.2219
Etnk1	ENSMUSG00000030275	-0.35037	0.16599
Nup155	ENSMUSG00000022142	-0.35029	0.11932
Snai3	ENSMUSG00000006587	-0.35023	NA
Stab1	ENSMUSG00000042286	-0.35017	0.075738
Plcg1	ENSMUSG00000016933	-0.35013	0.04187
Cdrt4	ENSMUSG00000042200	-0.35001	NA
Mgat4c	ENSMUSG00000019888	-0.34994	0.13242
Gfra2	ENSMUSG00000022103	-0.34972	0.018328
Dlg3	ENSMUSG00000000881	-0.34959	0.060179
Pak3	ENSMUSG00000031284	-0.34939	0.012493
Cacna1d	ENSMUSG00000015968	-0.34934	0.24529
Kncn	ENSMUSG00000073774	-0.34914	NA
Dusp2	ENSMUSG00000027368	-0.34907	0.32011
Srpk2	ENSMUSG00000062604	-0.34898	0.039164
9230110C19Rik	ENSMUSG00000053070	-0.34895	0.18667
Npr3	ENSMUSG00000022206	-0.34875	0.21675
Sec1	ENSMUSG00000040364	-0.34873	0.32585
Zcchc7	ENSMUSG00000035649	-0.34871	0.020029
Dnajc6	ENSMUSG00000028528	-0.34866	0.13739
Gm10071	ENSMUSG00000059776	-0.34861	0.341
9530080O11Rik	ENSMUSG00000044125	-0.34839	0.21838
Fbxo32	ENSMUSG00000022358	-0.34823	0.10145
Gm10384	ENSMUSG00000072618	-0.34823	NA
Rnf32	ENSMUSG00000029130	-0.34822	0.050281
Igf1r	ENSMUSG00000005533	-0.3482	0.096155
Lig4	ENSMUSG00000049717	-0.34813	0.16274
Map2	ENSMUSG00000015222	-0.34806	0.16362
Smarcad1	ENSMUSG00000029920	-0.34804	0.12078
Sdk2	ENSMUSG00000041592	-0.34804	0.17639
Col4a6	ENSMUSG00000031273	-0.348	0.3402
Srgap3	ENSMUSG00000030257	-0.34799	0.021296
Sipa1l2	ENSMUSG00000001995	-0.34794	0.086293
Tet1	ENSMUSG00000047146	-0.34794	0.19577
Rmnd1	ENSMUSG00000019763	-0.34791	0.020287
Slfn5	ENSMUSG00000054404	-0.34791	0.33679
Cd46	ENSMUSG00000016493	-0.34789	0.3422
2007-03-01	ENSMUSG00000026977	-0.34788	0.1687
Gm527	ENSMUSG00000047227	-0.34773	0.1223
Lrrc4c	ENSMUSG00000050587	-0.34773	0.054527
Clvs1	ENSMUSG00000041216	-0.34771	0.34055
Fam35a	ENSMUSG00000041471	-0.34736	0.22405
Abcb7	ENSMUSG00000031333	-0.34732	0.074183
2700097O09Rik	ENSMUSG00000062198	-0.34732	0.1558
Lpgat1	ENSMUSG00000026623	-0.34725	0.081123
Ipp	ENSMUSG00000028696	-0.34699	0.21314
Dtl	ENSMUSG00000037474	-0.34686	0.20268
Camk1d	ENSMUSG00000039145	-0.34686	0.12301
9230114K14Rik	ENSMUSG00000097145	-0.34686	0.34331
Rreb1	ENSMUSG00000039087	-0.34679	0.31083
1700014D04Rik	ENSMUSG00000051054	-0.34672	NA
Atg2b	ENSMUSG00000041341	-0.3464	0.048052
Magi3	ENSMUSG00000052539	-0.34638	0.22175
Zfp715	ENSMUSG00000012640	-0.34637	0.19633
L3mbtl3	ENSMUSG00000039089	-0.34622	0.028361
Zfp81	ENSMUSG00000003929	-0.34617	0.048814
Kidins220	ENSMUSG00000036333	-0.34616	0.084115
Tmod2	ENSMUSG00000032186	-0.34596	0.080513
F8	ENSMUSG00000031196	-0.34594	0.30005
Ralgps2	ENSMUSG00000026594	-0.34593	0.010012
Ifi204	ENSMUSG00000073489	-0.34578	NA
Stil	ENSMUSG00000028718	-0.34573	NA
Tbc1d1	ENSMUSG00000029174	-0.34567	0.18973
Dpp9	ENSMUSG00000001229	-0.34561	0.031015
Apobr	ENSMUSG00000042759	-0.34559	0.26439
Podn	ENSMUSG00000028600	-0.34555	0.27311
Xkr4	ENSMUSG00000051951	-0.34536	0.30833
Ncoa1	ENSMUSG00000020647	-0.34483	0.068811
Peg3	ENSMUSG00000002265	-0.3448	0.087305
Cltc	ENSMUSG00000047126	-0.34476	0.086293
Rbfox2	ENSMUSG00000033565	-0.34472	0.00083412
Gab3	ENSMUSG00000032750	-0.3446	0.30122
Atp2b1	ENSMUSG00000019943	-0.34458	0.16822
Katnal1	ENSMUSG00000041298	-0.3445	0.10156
Lonrf3	ENSMUSG00000016239	-0.34432	0.34678
Fer	ENSMUSG00000000127	-0.34426	0.072955
RP24-255G23.1	ENSMUSG00000100627	-0.34422	0.28784
Gm26964	ENSMUSG00000098196	-0.34416	0.23421
Gm10037	ENSMUSG00000058246	-0.34411	0.18755
RP23-149A5.3	ENSMUSG00000100426	-0.344	NA
Pde11a	ENSMUSG00000075270	-0.34386	0.34678
Baz1b	ENSMUSG00000002748	-0.34382	0.031456
Olfm4	ENSMUSG00000022026	-0.34351	0.33605
Zbtb14	ENSMUSG00000049672	-0.3435	0.058637
Htt	ENSMUSG00000029104	-0.34346	0.066808
Alg10b	ENSMUSG00000075470	-0.34333	0.34834
Zc3h4	ENSMUSG00000059273	-0.34325	0.1045
Pde3a	ENSMUSG00000041741	-0.34319	0.25128
Gm16576	ENSMUSG00000087543	-0.34312	0.34873
Map3k7cl	ENSMUSG00000025610	-0.34282	0.33877
Irg1	ENSMUSG00000022126	-0.34265	NA
Sp4	ENSMUSG00000025323	-0.3426	0.26183
Rictor	ENSMUSG00000050310	-0.34251	0.10687
Fry	ENSMUSG00000056602	-0.34244	0.14502
Ncam1	ENSMUSG00000039542	-0.34234	0.16148
Sec24d	ENSMUSG00000039234	-0.34215	0.25293
Sfrp4	ENSMUSG00000021319	-0.34206	0.21422
Pik3ap1	ENSMUSG00000025017	-0.34205	0.2219
Rpl27-ps1	ENSMUSG00000079137	-0.34201	NA
Cdh23	ENSMUSG00000012819	-0.34193	0.23936
Plekho2	ENSMUSG00000050721	-0.34175	0.055494
Rtbdn	ENSMUSG00000048617	-0.34159	0.24509
Trpm7	ENSMUSG00000027365	-0.34148	0.25625
Atrnl1	ENSMUSG00000054843	-0.34148	0.068176
Gm13295	ENSMUSG00000080905	-0.34144	NA
Pkd1l2	ENSMUSG00000034416	-0.34142	NA
Gsk3b	ENSMUSG00000022812	-0.3414	0.031469
Pten	ENSMUSG00000013663	-0.34135	0.15568
Senp5	ENSMUSG00000022772	-0.34125	0.28857
Bbs1	ENSMUSG00000006464	-0.34113	0.074647
Celsr2	ENSMUSG00000068740	-0.3411	0.13357
Meg3	ENSMUSG00000021268	-0.34105	0.18321
Kmt2e	ENSMUSG00000029004	-0.34105	0.28199
Wee1	ENSMUSG00000031016	-0.34086	0.25128
Xdh	ENSMUSG00000024066	-0.34085	0.15254
Ift172	ENSMUSG00000038564	-0.34076	0.00018062
Unc5c	ENSMUSG00000059921	-0.34067	0.14426
Gvin1	ENSMUSG00000045868	-0.34048	NA
Maf	ENSMUSG00000055435	-0.34041	0.079168
Rab11fip2	ENSMUSG00000040022	-0.34021	0.17274
Pramef8	ENSMUSG00000046862	-0.33988	0.074627
Pigg	ENSMUSG00000029263	-0.33984	0.23437
Ophn1	ENSMUSG00000031214	-0.33976	0.027063
Zfp39	ENSMUSG00000037001	-0.33964	0.10367
Nsd1	ENSMUSG00000021488	-0.3395	0.041763
Rab17	ENSMUSG00000026304	-0.33947	NA
Tcerg1l	ENSMUSG00000091002	-0.33899	0.089738
Cdh12	ENSMUSG00000040452	-0.33881	0.29271
Atp8a1	ENSMUSG00000037685	-0.33877	0.066289
Pde4a	ENSMUSG00000032177	-0.33875	0.046968
Asb18	ENSMUSG00000067081	-0.33873	0.15606
AI593442	ENSMUSG00000078307	-0.33869	0.027869
Fam179b	ENSMUSG00000035614	-0.33867	0.25276
Unc5d	ENSMUSG00000063626	-0.33865	0.19331
Zfp827	ENSMUSG00000071064	-0.3386	0.10233
Klhl2	ENSMUSG00000031605	-0.33852	0.18389
Prox2os	ENSMUSG00000093629	-0.33835	NA
Dppa2	ENSMUSG00000072419	-0.33834	NA
Gm16185	ENSMUSG00000084911	-0.33809	0.3077
AV039307	ENSMUSG00000087519	-0.33807	NA
Jmjd4	ENSMUSG00000036819	-0.33805	0.13495
Tvp23a	ENSMUSG00000050908	-0.33803	0.28651
Tmem132b	ENSMUSG00000070498	-0.33802	0.17216
Hyou1	ENSMUSG00000032115	-0.33796	0.0052744
Cacnb2	ENSMUSG00000057914	-0.33796	0.020288
Gm18190	ENSMUSG00000098900	-0.33787	0.28815
Cgn	ENSMUSG00000068876	-0.33785	0.33658
Zfp292	ENSMUSG00000039967	-0.33771	0.18983
Kif23	ENSMUSG00000032254	-0.33767	0.35474
Agps	ENSMUSG00000042410	-0.33763	0.11276
Meis2	ENSMUSG00000027210	-0.33753	0.13624
Tmem2	ENSMUSG00000024754	-0.3375	0.24857
Nvl	ENSMUSG00000026516	-0.33745	0.26698
Elovl6	ENSMUSG00000041220	-0.33736	0.017929
Ptpra	ENSMUSG00000027303	-0.33729	0.13708
Fam221b	ENSMUSG00000043633	-0.33699	0.26416
Epg5	ENSMUSG00000039840	-0.33698	0.16255
9830147E19Rik	ENSMUSG00000074158	-0.33698	0.26698
Mga	ENSMUSG00000033943	-0.3369	0.22723
Mon2	ENSMUSG00000034602	-0.33678	0.071636
Ints10	ENSMUSG00000031864	-0.33666	0.0023771
Gm12680	ENSMUSG00000087349	-0.33663	NA
Adamts2	ENSMUSG00000036545	-0.33657	0.08389
Lrrc8c	ENSMUSG00000054720	-0.33647	0.029872
Gm4070	ENSMUSG00000078606	-0.3364	NA
Gm6939	ENSMUSG00000082922	-0.3364	0.35507
Gmfb	ENSMUSG00000062014	-0.33637	0.12229
Lgr6	ENSMUSG00000042793	-0.33622	0.29309
Glcci1	ENSMUSG00000029638	-0.3362	0.35691
E130311K13Rik	ENSMUSG00000048581	-0.33617	0.028333
Neb	ENSMUSG00000026950	-0.33611	0.33658
Il7	ENSMUSG00000040329	-0.33605	NA
Fam115a	ENSMUSG00000036667	-0.33602	0.086686
Abl2	ENSMUSG00000026596	-0.33596	0.14574
Gm12063	ENSMUSG00000085167	-0.3359	0.341
Rsl1	ENSMUSG00000058900	-0.33572	0.28941
Zfp955b	ENSMUSG00000096910	-0.33571	0.35507
Aoc2	ENSMUSG00000078651	-0.33552	0.21379
Nudt12	ENSMUSG00000024228	-0.3355	0.25276
Ttc30a2	ENSMUSG00000075272	-0.33547	NA
Zfp72	ENSMUSG00000069184	-0.3354	0.35799
9330159F19Rik	ENSMUSG00000004360	-0.33534	0.0018008
Ano5	ENSMUSG00000055489	-0.33528	0.34678
Gfpt1	ENSMUSG00000029992	-0.33523	0.16447
Kif18b	ENSMUSG00000051378	-0.33522	NA
Mfsd8	ENSMUSG00000025759	-0.33518	0.077335
Lemd1	ENSMUSG00000079330	-0.33517	0.31197
Dsn1	ENSMUSG00000027635	-0.33511	0.25252
Dennd2c	ENSMUSG00000007379	-0.33505	0.35143
Hhex	ENSMUSG00000024986	-0.33505	0.29747
Sox30	ENSMUSG00000040489	-0.33492	0.35787
Cep290	ENSMUSG00000019971	-0.3349	0.35535
Gga3	ENSMUSG00000020740	-0.33487	0.017771
Gria2	ENSMUSG00000033981	-0.33483	0.26416
Narf	ENSMUSG00000000056	-0.3348	0.0069181
3110039M20Rik	ENSMUSG00000089922	-0.33479	0.14119
Cnksr2	ENSMUSG00000025658	-0.33471	0.19523
Met	ENSMUSG00000009376	-0.33454	0.3033
Phf19	ENSMUSG00000026873	-0.33452	0.26698
Strn	ENSMUSG00000024077	-0.33444	0.0018882
Aff4	ENSMUSG00000049470	-0.33431	0.16396
Aaed1	ENSMUSG00000021482	-0.3343	0.29962
Arap2	ENSMUSG00000037999	-0.33421	0.14995
Cenpu	ENSMUSG00000031629	-0.3342	0.34331
Ankhd1	ENSMUSG00000024483	-0.33418	0.12664
Gltscr1l	ENSMUSG00000036568	-0.33418	0.12583
Zdhhc23	ENSMUSG00000036304	-0.33416	0.33265
Mef2c	ENSMUSG00000005583	-0.33407	0.10052
Ccr2	ENSMUSG00000049103	-0.33397	NA
Atp2b4	ENSMUSG00000026463	-0.33385	0.20823
Zfp11	ENSMUSG00000051034	-0.33375	0.090632
Chd6	ENSMUSG00000057133	-0.33362	0.19112
Thbs4	ENSMUSG00000021702	-0.33342	0.23814
Tmem69	ENSMUSG00000055900	-0.33337	0.082991
Tenm1	ENSMUSG00000016150	-0.33334	0.34699
Gpr22	ENSMUSG00000044067	-0.33334	0.15294
Lrp2bp	ENSMUSG00000031637	-0.33331	NA
Tmem74	ENSMUSG00000054409	-0.33328	0.35106
Ccdc151	ENSMUSG00000039632	-0.33327	0.16362
Cenpe	ENSMUSG00000045328	-0.33306	0.21422
Mat1a	ENSMUSG00000037798	-0.33289	NA
Mme	ENSMUSG00000027820	-0.33288	0.36018
Parg	ENSMUSG00000021911	-0.33281	0.13762
Gm11728	ENSMUSG00000086902	-0.3328	0.36083
Plekha2	ENSMUSG00000031557	-0.33278	0.1655
Atrx	ENSMUSG00000031229	-0.33266	0.16447
Mina	ENSMUSG00000022724	-0.3325	0.22513
Igbp1b	ENSMUSG00000046717	-0.33224	0.33112
Tmem260	ENSMUSG00000036339	-0.33208	0.079893
Smc4	ENSMUSG00000034349	-0.33202	0.17799
Rab3c	ENSMUSG00000021700	-0.33199	0.19076
Micalcl	ENSMUSG00000030771	-0.33184	0.22964
Lrrtm3	ENSMUSG00000042846	-0.33175	0.028932
Arih1	ENSMUSG00000025234	-0.33166	0.1459
Kcnb2	ENSMUSG00000092083	-0.33156	0.13133
Slc24a4	ENSMUSG00000041771	-0.33131	0.20744
Gm10699	ENSMUSG00000074461	-0.33121	0.0083443
Myh9	ENSMUSG00000022443	-0.3312	0.10256
Rint1	ENSMUSG00000028999	-0.33117	0.031182
Zfp40	ENSMUSG00000002617	-0.33111	0.089738
Iqgap3	ENSMUSG00000028068	-0.33111	0.32081
Gm10629	ENSMUSG00000074113	-0.33107	NA
Prkar2b	ENSMUSG00000002997	-0.33085	0.064472
Ntf3	ENSMUSG00000049107	-0.33083	0.09841
Cacna2d3	ENSMUSG00000021991	-0.33079	0.04529
Fkbp5	ENSMUSG00000024222	-0.33072	0.14888
Mpp5	ENSMUSG00000021112	-0.33068	0.13133
Plxna1	ENSMUSG00000030084	-0.33059	0.17834
Tmem33	ENSMUSG00000037720	-0.33046	0.029631
Kpna4	ENSMUSG00000027782	-0.33042	0.17928
Mybph	ENSMUSG00000042451	-0.33038	0.34879
Gm26792	ENSMUSG00000096996	-0.33021	0.36541
Ung	ENSMUSG00000029591	-0.3302	0.21848
Mab21l1	ENSMUSG00000056947	-0.33018	0.36468
Zbtb26	ENSMUSG00000050714	-0.33013	0.23525
Syngap1	ENSMUSG00000067629	-0.33002	0.32318
Dusp18	ENSMUSG00000047205	-0.32995	0.027925
Ldb2	ENSMUSG00000039706	-0.32986	0.058599
Gm7873	ENSMUSG00000090777	-0.32967	0.36572
AA543186	ENSMUSG00000097345	-0.32942	NA
Fndc9	ENSMUSG00000048721	-0.32937	0.34303
Ralgapb	ENSMUSG00000027652	-0.32936	0.096536
Trim66	ENSMUSG00000031026	-0.32922	0.23814
4933427D14Rik	ENSMUSG00000020807	-0.32918	0.029389
Epha10	ENSMUSG00000028876	-0.32918	0.061639
Mettl5os	ENSMUSG00000085735	-0.32908	0.34678
Ano3	ENSMUSG00000074968	-0.32901	0.21891
Thnsl1	ENSMUSG00000048550	-0.32899	0.090121
Eif4g3	ENSMUSG00000028760	-0.32894	0.088065
Tarm1	ENSMUSG00000053338	-0.32873	NA
Atrn	ENSMUSG00000027312	-0.32864	0.072955
Pth2r	ENSMUSG00000025946	-0.32855	0.36712
A330102I10Rik	ENSMUSG00000086363	-0.32846	0.29257
Ncapg2	ENSMUSG00000042029	-0.3284	0.24262
Ap1s3	ENSMUSG00000054702	-0.3283	0.22929
Gabrb3	ENSMUSG00000033676	-0.32829	0.12336
Chn1os3	ENSMUSG00000086544	-0.32828	0.36616
Lrrn1	ENSMUSG00000034648	-0.32822	0.1446
Ranbp2	ENSMUSG00000003226	-0.32812	0.3148
Piwil1	ENSMUSG00000029423	-0.3281	NA
Asxl3	ENSMUSG00000045215	-0.32808	0.14595
Son	ENSMUSG00000022961	-0.32795	0.13919
A830018L16Rik	ENSMUSG00000057715	-0.3279	0.17986
Zfp846	ENSMUSG00000058192	-0.32789	0.10979
Olfml2b	ENSMUSG00000038463	-0.32781	0.19448
Cdc42bpa	ENSMUSG00000026490	-0.32772	0.12353
Ddx26b	ENSMUSG00000035967	-0.3277	0.18389
5330439A09Rik	ENSMUSG00000089708	-0.32763	NA
G530011O06Rik	ENSMUSG00000072844	-0.32751	0.36906
Gm26831	ENSMUSG00000097408	-0.32741	NA
Arhgef28	ENSMUSG00000021662	-0.32733	0.10818
Pum1	ENSMUSG00000028580	-0.32722	0.074554
Neu3	ENSMUSG00000035239	-0.32716	0.26692
Gm15850	ENSMUSG00000086264	-0.32709	NA
Srr	ENSMUSG00000001323	-0.32699	0.02378
Zfp385b	ENSMUSG00000027016	-0.32695	0.029856
Cttnbp2	ENSMUSG00000000416	-0.32693	0.26003
Nckap1	ENSMUSG00000027002	-0.32693	0.054088
Fen1	ENSMUSG00000024742	-0.32681	NA
Maml3	ENSMUSG00000061143	-0.32676	0.28103
Adnp	ENSMUSG00000051149	-0.32672	0.37087
Ube3a	ENSMUSG00000025326	-0.3266	0.31784
Slfn3	ENSMUSG00000018986	-0.32639	NA
Calcb	ENSMUSG00000030666	-0.32636	NA
Zbtb16	ENSMUSG00000066687	-0.32627	0.36795
Camkk2	ENSMUSG00000029471	-0.32607	0.10535
Ano1	ENSMUSG00000031075	-0.32607	0.36202
Zbtb38	ENSMUSG00000040433	-0.32595	0.078709
Zfp397	ENSMUSG00000024276	-0.32569	0.18973
Il1b	ENSMUSG00000027398	-0.32567	NA
Cspg4	ENSMUSG00000032911	-0.32559	0.070916
Tenm4	ENSMUSG00000048078	-0.32557	1.7424e-05
Tbx2	ENSMUSG00000000093	-0.32547	0.3221
Hspa1l	ENSMUSG00000007033	-0.32542	0.36763
Zkscan2	ENSMUSG00000030757	-0.32542	0.37019
Zfp493	ENSMUSG00000090659	-0.32513	0.19628
Gm12940	ENSMUSG00000085334	-0.32499	0.30208
Chm	ENSMUSG00000025531	-0.32494	0.25674
Zfp300	ENSMUSG00000031079	-0.32477	0.25638
Rgs5	ENSMUSG00000026678	-0.32476	0.0003675
Ckap2	ENSMUSG00000037725	-0.32473	0.36322
Lcn2	ENSMUSG00000026822	-0.32464	0.36555
Disp2	ENSMUSG00000040035	-0.32457	0.035727
Tmem150c	ENSMUSG00000050640	-0.32457	0.061806
Zfp260	ENSMUSG00000049421	-0.32436	0.05339
Skiv2l2	ENSMUSG00000016018	-0.32435	0.17031
Pcmtd2	ENSMUSG00000027589	-0.32435	0.24875
Ankrd26	ENSMUSG00000007827	-0.32415	0.27878
Setd7	ENSMUSG00000037111	-0.32413	0.17331
Ptplad2	ENSMUSG00000028497	-0.32407	0.30177
Slc8a1	ENSMUSG00000054640	-0.32407	0.36572
Gm16485	ENSMUSG00000078117	-0.32386	0.23524
Tdg	ENSMUSG00000034674	-0.32382	0.1805
Scn5a	ENSMUSG00000032511	-0.32378	0.27205
Elmod2	ENSMUSG00000035151	-0.32356	0.20971
Dpy19l3	ENSMUSG00000043671	-0.32353	0.0061891
Ccdc93	ENSMUSG00000026339	-0.32352	0.21046
Gm4792	ENSMUSG00000053420	-0.32351	NA
2210018M11Rik	ENSMUSG00000035401	-0.32333	0.2872
Zscan22	ENSMUSG00000054715	-0.32333	0.079187
Ncor1	ENSMUSG00000018501	-0.32331	0.2319
Ddx4	ENSMUSG00000021758	-0.3233	0.36097
Nrcam	ENSMUSG00000020598	-0.32313	0.12221
F730043M19Rik	ENSMUSG00000052125	-0.32312	0.15386
Bend4	ENSMUSG00000092060	-0.32312	0.068871
4933404O12Rik	ENSMUSG00000097908	-0.32303	0.075952
Rimbp2	ENSMUSG00000029420	-0.32298	0.34989
Qtrtd1	ENSMUSG00000022704	-0.32293	0.078709
Cdr1	ENSMUSG00000090546	-0.32292	0.31017
Ints8	ENSMUSG00000040738	-0.32291	0.2368
Taf2	ENSMUSG00000037343	-0.32281	0.16362
D230017M19Rik	ENSMUSG00000097131	-0.32278	0.13912
Pcdhb18	ENSMUSG00000048347	-0.32275	0.25248
Gphn	ENSMUSG00000047454	-0.32269	0.099381
Echdc1	ENSMUSG00000019883	-0.32265	0.36322
Baz2b	ENSMUSG00000026987	-0.32259	0.1805
Akt3	ENSMUSG00000019699	-0.32257	0.11943
Fam198b	ENSMUSG00000027955	-0.32254	0.32191
Gm17315	ENSMUSG00000097791	-0.32247	NA
Zfp458	ENSMUSG00000055480	-0.32246	0.35691
Gad2	ENSMUSG00000026787	-0.32243	0.02507
Dhx36	ENSMUSG00000027770	-0.3224	0.18087
Lman2	ENSMUSG00000021484	-0.32237	0.00074724
Camsap2	ENSMUSG00000041570	-0.32221	0.12336
Ank2	ENSMUSG00000032826	-0.32217	0.11872
Fam168a	ENSMUSG00000029461	-0.32213	0.15467
Celf2	ENSMUSG00000002107	-0.32204	0.0010129
Rgmb	ENSMUSG00000048027	-0.32199	0.2808
Chuk	ENSMUSG00000025199	-0.3219	0.25488
Gria3	ENSMUSG00000001986	-0.32181	0.18056
Rbbp5	ENSMUSG00000026439	-0.32171	0.073945
Sbno1	ENSMUSG00000038095	-0.32171	0.0039168
Gpr133	ENSMUSG00000044017	-0.32146	0.26868
Golga4	ENSMUSG00000038708	-0.32136	0.23491
Gpr155	ENSMUSG00000041762	-0.32126	0.10625
Mgat5	ENSMUSG00000036155	-0.32111	0.0090422
Slit1	ENSMUSG00000025020	-0.32109	0.13851
Cav1	ENSMUSG00000007655	-0.32105	0.096155
Camk4	ENSMUSG00000038128	-0.32102	0.03324
Tubd1	ENSMUSG00000020513	-0.32098	0.15077
Pcdhb11	ENSMUSG00000051486	-0.32093	0.3259
Ltbp2	ENSMUSG00000002020	-0.32092	0.37725
Pwwp2a	ENSMUSG00000044950	-0.32084	0.1687
Ddhd2	ENSMUSG00000061313	-0.32084	0.0018764
Zfp526	ENSMUSG00000046541	-0.3208	0.30177
Bicd2	ENSMUSG00000037933	-0.32058	0.23584
Kdm5c	ENSMUSG00000025332	-0.32055	0.089212
Fmnl2	ENSMUSG00000036053	-0.3204	0.223
Myo1a	ENSMUSG00000025401	-0.3203	NA
Gabrg3	ENSMUSG00000055026	-0.32025	0.058599
Fpgt	ENSMUSG00000053870	-0.32008	0.14629
Map3k13	ENSMUSG00000033618	-0.31995	0.34126
Hook1	ENSMUSG00000028572	-0.31992	0.26397
Ttc3	ENSMUSG00000040785	-0.31981	0.066694
Sprtn	ENSMUSG00000031986	-0.31973	0.38217
Zfp110	ENSMUSG00000058638	-0.3195	0.044123
Sox7	ENSMUSG00000063060	-0.31948	0.31655
Exoc8	ENSMUSG00000074030	-0.31939	0.026295
Nlrc5	ENSMUSG00000074151	-0.31939	0.37884
Kcna2	ENSMUSG00000040724	-0.31912	0.35243
Atxn3	ENSMUSG00000021189	-0.31907	0.15499
Polk	ENSMUSG00000021668	-0.31905	0.28166
9130019O22Rik	ENSMUSG00000030823	-0.31904	0.17938
Zbtb1	ENSMUSG00000033454	-0.31898	0.18973
3632454L22Rik	ENSMUSG00000089759	-0.31888	0.37654
Irak4	ENSMUSG00000059883	-0.31887	0.21149
Snx27	ENSMUSG00000028136	-0.31884	0.15309
Avpr1b	ENSMUSG00000026432	-0.31871	0.38429
Zfp583	ENSMUSG00000030443	-0.31854	0.12265
Mfsd6	ENSMUSG00000041439	-0.31849	0.17675
Bdp1	ENSMUSG00000049658	-0.31846	0.30005
Ccdc177	ENSMUSG00000062961	-0.31845	0.054088
Pdk1	ENSMUSG00000006494	-0.31844	0.058599
Upf2	ENSMUSG00000043241	-0.31832	0.011509
Thoc2	ENSMUSG00000037475	-0.31831	0.27416
Pclo	ENSMUSG00000098239	-0.31826	0.029389
Pdia6	ENSMUSG00000020571	-0.31825	0.051561
Ccdc176	ENSMUSG00000057265	-0.31817	0.20661
Gm13391	ENSMUSG00000086109	-0.31817	NA
Rad54l2	ENSMUSG00000040661	-0.3181	0.235
Acer2	ENSMUSG00000038007	-0.31807	0.17023
Gm12992	ENSMUSG00000085667	-0.31802	0.34605
Rbfox1	ENSMUSG00000008658	-0.31791	0.066953
Grm5	ENSMUSG00000049583	-0.31773	0.24033
Pcdh7	ENSMUSG00000029108	-0.31765	0.3646
Opa1	ENSMUSG00000038084	-0.3176	0.058024
Mical3	ENSMUSG00000051586	-0.31749	0.090604
Slc4a4	ENSMUSG00000060961	-0.31747	0.14692
Tmem181a	ENSMUSG00000038141	-0.31745	0.30196
Khdrbs3	ENSMUSG00000022332	-0.31743	0.075757
Ptprd	ENSMUSG00000028399	-0.31743	0.16112
Arhgap32	ENSMUSG00000041444	-0.31741	0.14091
Zfc3h1	ENSMUSG00000034163	-0.31731	0.10181
Tubgcp4	ENSMUSG00000027263	-0.31727	0.33204
Ovol2	ENSMUSG00000037279	-0.31718	0.34547
Cacng6	ENSMUSG00000078815	-0.31704	0.24916
Mfsd9	ENSMUSG00000041945	-0.31703	0.2308
Nos2	ENSMUSG00000020826	-0.317	0.38726
Macf1	ENSMUSG00000028649	-0.31696	0.18874
Phf8	ENSMUSG00000041229	-0.31693	0.16082
Astn1	ENSMUSG00000026587	-0.31691	0.13336
Vti1a	ENSMUSG00000024983	-0.31689	0.00051995
Fam208b	ENSMUSG00000033799	-0.31688	0.14119
Rnpep	ENSMUSG00000041926	-0.31688	0.11488
Pou3f4	ENSMUSG00000056854	-0.3168	0.35143
Phospho1	ENSMUSG00000050860	-0.31671	0.3752
Pdzd7	ENSMUSG00000074818	-0.31669	0.1987
Zfp236	ENSMUSG00000041258	-0.31668	0.21916
Rabgap1l	ENSMUSG00000026721	-0.31651	0.025967
Gabbr2	ENSMUSG00000039809	-0.31649	0.15297
Stat4	ENSMUSG00000062939	-0.31633	NA
Ptpro	ENSMUSG00000030223	-0.31629	0.14567
Arhgef6	ENSMUSG00000031133	-0.31628	0.13979
Ppip5k1	ENSMUSG00000033526	-0.31623	0.12889
Khnyn	ENSMUSG00000047153	-0.31619	0.13919
Dlat	ENSMUSG00000000168	-0.31608	0.078344
Agfg1	ENSMUSG00000026159	-0.31605	0.071632
Far1	ENSMUSG00000030759	-0.31581	0.095669
Cabp4	ENSMUSG00000024842	-0.31578	0.36859
Thbd	ENSMUSG00000074743	-0.31577	0.22728
Ptprn2	ENSMUSG00000056553	-0.31576	0.35513
Gm3985	ENSMUSG00000079070	-0.31571	NA
Sertm1	ENSMUSG00000056306	-0.31557	0.040432
Vcpip1	ENSMUSG00000045210	-0.31552	0.066846
Wif1	ENSMUSG00000020218	-0.31547	0.38828
Gm7125	ENSMUSG00000069996	-0.31546	NA
Erich1	ENSMUSG00000051978	-0.31538	0.18262
Atp8a2	ENSMUSG00000021983	-0.31535	0.16261
Klhl3	ENSMUSG00000014164	-0.31501	0.3793
Thap2	ENSMUSG00000020137	-0.31501	0.35627
Neurod2	ENSMUSG00000038255	-0.31499	0.13141
Gm11637	ENSMUSG00000084375	-0.31488	0.26376
Gm20681	ENSMUSG00000093682	-0.31484	0.38828
Utp20	ENSMUSG00000004356	-0.31476	0.015495
Dot1l	ENSMUSG00000061589	-0.31474	0.13762
Large	ENSMUSG00000004383	-0.31464	0.13599
Tet3	ENSMUSG00000034832	-0.31458	0.23521
Herc3	ENSMUSG00000029804	-0.31453	0.20986
Kcne3	ENSMUSG00000035165	-0.31449	0.39063
Ogfod1	ENSMUSG00000033009	-0.31447	0.20546
Cdkal1	ENSMUSG00000006191	-0.31444	0.031006
Hmgxb4	ENSMUSG00000034518	-0.31438	0.12078
Cers4	ENSMUSG00000008206	-0.31432	0.010477
Olfr564	ENSMUSG00000048469	-0.31429	NA
Gm26560	ENSMUSG00000097029	-0.31428	0.3752
Faxc	ENSMUSG00000028246	-0.31425	0.38828
Syne2	ENSMUSG00000063450	-0.31422	0.073117
Tbx4	ENSMUSG00000000094	-0.3142	0.39099
A530017D24Rik	ENSMUSG00000072847	-0.3141	0.15128
Rsph6a	ENSMUSG00000040866	-0.31407	0.38947
Galnt4	ENSMUSG00000090035	-0.31398	0.18639
Pclo	ENSMUSG00000061601	-0.31383	0.1077
D330050G23Rik	ENSMUSG00000085316	-0.3138	0.28413
Cep350	ENSMUSG00000033671	-0.31376	0.25885
BC068157	ENSMUSG00000064125	-0.31374	0.17406
Whsc1l1	ENSMUSG00000054823	-0.31371	0.097181
Map2k6	ENSMUSG00000020623	-0.31369	0.059217
Ubr2	ENSMUSG00000023977	-0.31369	0.15523
Wdr60	ENSMUSG00000042050	-0.31333	0.20595
RP23-393F10.3	ENSMUSG00000101930	-0.31323	0.26596
Glg1	ENSMUSG00000003316	-0.31322	0.33605
Lao1	ENSMUSG00000024903	-0.31322	0.30536
Tgtp2	ENSMUSG00000078921	-0.31309	0.37406
Mum1l1	ENSMUSG00000042515	-0.31308	0.28742
D030068K23Rik	ENSMUSG00000097393	-0.31274	0.37848
Pkp2	ENSMUSG00000041957	-0.3125	0.21835
9430091E24Rik	ENSMUSG00000084808	-0.31246	0.34881
Zfp62	ENSMUSG00000046311	-0.31245	0.22156
Gpr173	ENSMUSG00000056679	-0.31239	0.11186
Dlg2	ENSMUSG00000052572	-0.31214	0.3867
Tubgcp5	ENSMUSG00000033790	-0.31209	0.11563
Gm26984	ENSMUSG00000098204	-0.31207	NA
Grm7	ENSMUSG00000056755	-0.31204	0.16396
Inpp5e	ENSMUSG00000026925	-0.31197	0.052844
Uso1	ENSMUSG00000029407	-0.31178	0.10977
Hpgds	ENSMUSG00000029919	-0.31171	0.1597
Sipa1l1	ENSMUSG00000042700	-0.31164	0.26003
Ccng1	ENSMUSG00000020326	-0.31152	0.035284
Arhgef11	ENSMUSG00000041977	-0.31147	0.32626
Col5a2	ENSMUSG00000026042	-0.31142	0.29257
Ireb2	ENSMUSG00000032293	-0.31136	0.17652
L1cam	ENSMUSG00000031391	-0.31128	0.14093
Ppp1r12a	ENSMUSG00000019907	-0.31123	0.38217
Rif1	ENSMUSG00000036202	-0.31113	0.28145
Abcc8	ENSMUSG00000040136	-0.31112	0.089738
Rps6ka5	ENSMUSG00000021180	-0.31111	0.34506
Fnbp1l	ENSMUSG00000039735	-0.31107	0.22512
Adamts8	ENSMUSG00000031994	-0.31094	0.17889
Creg2	ENSMUSG00000050967	-0.31091	0.071717
Sorbs2os	ENSMUSG00000085440	-0.31088	NA
Mre11a	ENSMUSG00000031928	-0.31086	0.26612
Prox1	ENSMUSG00000010175	-0.31066	0.21684
Lnpep	ENSMUSG00000023845	-0.31063	0.35528
Zbtb7a	ENSMUSG00000035011	-0.31056	0.21433
Gpr25	ENSMUSG00000052759	-0.31056	0.33115
Mecp2	ENSMUSG00000031393	-0.31048	0.071202
Nxpe3	ENSMUSG00000075033	-0.31044	0.12086
Pappa	ENSMUSG00000028370	-0.31039	0.3955
Fxyd3	ENSMUSG00000057092	-0.31038	0.39422
Anapc1	ENSMUSG00000014355	-0.31013	0.085228
Myo9b	ENSMUSG00000004677	-0.30988	0.021973
Gm11766	ENSMUSG00000086924	-0.30981	0.39012
Gm14446	ENSMUSG00000079339	-0.30977	0.2633
Cenpk	ENSMUSG00000021714	-0.30976	0.39595
RP23-184B11.7	ENSMUSG00000100183	-0.30976	NA
Phip	ENSMUSG00000032253	-0.30974	0.24067
Gapdhs	ENSMUSG00000061099	-0.30969	0.38348
Fam206a	ENSMUSG00000038827	-0.30935	0.03596
Uhrf1bp1l	ENSMUSG00000019951	-0.30906	0.09362
Cfc1	ENSMUSG00000026124	-0.30906	NA
Drd5	ENSMUSG00000039358	-0.30905	0.085335
Gnao1	ENSMUSG00000031748	-0.30895	0.087957
Nwd1	ENSMUSG00000048148	-0.30887	0.36322
Mlxipl	ENSMUSG00000005373	-0.3088	0.28029
Zzef1	ENSMUSG00000055670	-0.30878	0.21916
Zfp605	ENSMUSG00000023284	-0.30868	0.33115
4833422C13Rik	ENSMUSG00000074782	-0.30868	0.12715
Klhl29	ENSMUSG00000020627	-0.30863	0.21936
Rere	ENSMUSG00000039852	-0.30863	0.13485
BC048403	ENSMUSG00000053684	-0.30856	0.23278
Asxl1	ENSMUSG00000042548	-0.30851	0.068803
Cyfip2	ENSMUSG00000020340	-0.30843	0.1597
Slc9a2	ENSMUSG00000026062	-0.30843	0.17504
Slc19a3	ENSMUSG00000038496	-0.30842	0.23814
Prepl	ENSMUSG00000024127	-0.3083	0.37696
Gmeb1	ENSMUSG00000028901	-0.30825	0.013995
Enox1	ENSMUSG00000022012	-0.3082	0.18604
Cdk14	ENSMUSG00000028926	-0.3081	0.1677
Pard3	ENSMUSG00000025812	-0.30808	0.21891
Mybpc1	ENSMUSG00000020061	-0.308	0.31153
Tlr13	ENSMUSG00000033777	-0.30793	0.20481
Slco5a1	ENSMUSG00000025938	-0.30784	0.34851
Arfgef2	ENSMUSG00000074582	-0.30779	0.13968
Dlg1	ENSMUSG00000022770	-0.30766	0.13687
Ercc6l2	ENSMUSG00000021470	-0.30757	0.2872
Prrg3	ENSMUSG00000033361	-0.30746	0.094812
Aasdh	ENSMUSG00000055923	-0.30745	0.17575
Tns4	ENSMUSG00000017607	-0.30742	0.37594
Naif1	ENSMUSG00000039164	-0.30742	0.097659
Cdk12	ENSMUSG00000003119	-0.3074	0.31512
Rnf165	ENSMUSG00000025427	-0.30728	0.13117
D3Bwg0562e	ENSMUSG00000044667	-0.30725	0.29191
Kctd12b	ENSMUSG00000041633	-0.30723	0.34401
Tnpo3	ENSMUSG00000012535	-0.30721	0.34042
Gm5595	ENSMUSG00000069727	-0.30712	0.18274
Ttll4	ENSMUSG00000033257	-0.30708	0.20538
Pag1	ENSMUSG00000027508	-0.30705	0.25128
Ankfy1	ENSMUSG00000020790	-0.30703	0.024316
Hnrnpll	ENSMUSG00000024095	-0.30698	0.17709
Zim1	ENSMUSG00000002266	-0.30697	0.40126
BC030336	ENSMUSG00000046096	-0.30697	0.20538
4933416E14Rik	ENSMUSG00000086996	-0.30696	NA
Gbx1	ENSMUSG00000067724	-0.30693	NA
Mreg	ENSMUSG00000039395	-0.30678	0.21401
Insr	ENSMUSG00000005534	-0.30651	0.15974
Med13	ENSMUSG00000034297	-0.30648	0.19043
Zfp955a	ENSMUSG00000094441	-0.30641	0.40189
Fstl4	ENSMUSG00000036264	-0.30633	0.3128
Gm26594	ENSMUSG00000097189	-0.30633	0.34303
Tanc2	ENSMUSG00000053580	-0.30624	0.079232
Wdr78	ENSMUSG00000035126	-0.30618	0.28986
Exph5	ENSMUSG00000034584	-0.30617	0.40273
Wbscr17	ENSMUSG00000034040	-0.30611	0.038676
Rsbn1l	ENSMUSG00000039968	-0.30609	0.21348
Tmed8	ENSMUSG00000034111	-0.30607	0.15017
Tenm2	ENSMUSG00000049336	-0.30606	0.35106
Odf3	ENSMUSG00000025482	-0.30601	NA
Phc3	ENSMUSG00000037652	-0.30595	0.20093
Gm9776	ENSMUSG00000042857	-0.30578	0.16919
A730011C13Rik	ENSMUSG00000084846	-0.30567	NA
Cdh11	ENSMUSG00000031673	-0.30566	0.32652
Ubn2	ENSMUSG00000038538	-0.30558	0.18395
Gpatch8	ENSMUSG00000034621	-0.30541	0.21858
Senp7	ENSMUSG00000052917	-0.30539	0.29783
Sel1l3	ENSMUSG00000029189	-0.30533	0.079232
Ndufaf4	ENSMUSG00000028261	-0.30518	0.019508
Sowahb	ENSMUSG00000045314	-0.30513	0.31992
Paxbp1	ENSMUSG00000022974	-0.30503	0.3245
Jakmip2	ENSMUSG00000024502	-0.30496	0.20971
Ncoa2	ENSMUSG00000005886	-0.30494	0.28022
Med13l	ENSMUSG00000018076	-0.30493	0.31406
Magi1	ENSMUSG00000045095	-0.30493	0.2254
Itch	ENSMUSG00000027598	-0.30488	0.22239
Gm10309	ENSMUSG00000071036	-0.30483	NA
Proser1	ENSMUSG00000049504	-0.30471	0.15111
Syt2	ENSMUSG00000026452	-0.3047	0.33658
Sbf2	ENSMUSG00000038371	-0.3046	0.16915
Zfp810	ENSMUSG00000066829	-0.30452	0.18356
Hs6st3	ENSMUSG00000053465	-0.30438	0.40761
2700049A03Rik	ENSMUSG00000034601	-0.30434	0.077972
Prkcb	ENSMUSG00000052889	-0.30432	0.0057747
Il1rl2	ENSMUSG00000070942	-0.30418	NA
Ihh	ENSMUSG00000006538	-0.30415	NA
Wasl	ENSMUSG00000029684	-0.3041	0.022607
C130060K24Rik	ENSMUSG00000029917	-0.3041	NA
Golm1	ENSMUSG00000021556	-0.30403	0.12848
Bub1b	ENSMUSG00000040084	-0.30401	0.35479
Sfpq	ENSMUSG00000028820	-0.30399	0.1078
Mef2d	ENSMUSG00000001419	-0.30394	0.23651
Cdkl2	ENSMUSG00000029403	-0.3039	0.15276
Arid4a	ENSMUSG00000048118	-0.30386	0.31213
Gucy1a3	ENSMUSG00000033910	-0.30384	0.27511
Trim9	ENSMUSG00000021071	-0.30377	0.075239
Stam	ENSMUSG00000026718	-0.30376	0.20809
Kcnv1	ENSMUSG00000022342	-0.3037	0.23641
Golga1	ENSMUSG00000026754	-0.30365	0.064472
Pcdh20	ENSMUSG00000050505	-0.3035	0.28157
Mkl2	ENSMUSG00000009569	-0.30327	0.10506
Med1	ENSMUSG00000018160	-0.30325	0.0012097
Parp14	ENSMUSG00000034422	-0.30322	0.25884
Fam114a2	ENSMUSG00000020523	-0.30317	0.01321
Slc24a5	ENSMUSG00000035183	-0.30308	0.40386
Gatad2b	ENSMUSG00000042390	-0.30306	0.3905
Kcnab1	ENSMUSG00000027827	-0.30297	0.11074
Rnf144b	ENSMUSG00000038068	-0.30286	0.1279
Mapkbp1	ENSMUSG00000033902	-0.30285	0.17189
Hfe2	ENSMUSG00000038403	-0.30284	0.40323
Ubr4	ENSMUSG00000066036	-0.30283	0.011801
Gbp4	ENSMUSG00000079363	-0.30274	0.40848
Grb7	ENSMUSG00000019312	-0.3027	0.3906
Ackr2	ENSMUSG00000044534	-0.30264	0.28057
Clock	ENSMUSG00000029238	-0.30259	0.31257
Gm26801	ENSMUSG00000097892	-0.30241	0.40189
Mrc1	ENSMUSG00000026712	-0.30235	0.3905
Creb3l2	ENSMUSG00000038648	-0.30234	0.094511
Gm15122	ENSMUSG00000087672	-0.30222	NA
Anks1b	ENSMUSG00000058589	-0.30213	0.18262
Ptprj	ENSMUSG00000025314	-0.30193	0.047623
Hapln1	ENSMUSG00000021613	-0.30187	0.25209
Mtmr1	ENSMUSG00000015214	-0.30184	0.17926
Serpina3f	ENSMUSG00000066363	-0.30177	NA
AK129341	ENSMUSG00000040729	-0.30174	0.3405
Sestd1	ENSMUSG00000042272	-0.30174	0.072283
Fam64a	ENSMUSG00000020808	-0.3014	0.4065
Nr3c2	ENSMUSG00000031618	-0.30137	0.18542
Slc17a5	ENSMUSG00000049624	-0.30132	0.099932
Adora1	ENSMUSG00000042429	-0.30129	0.26671
Pls3	ENSMUSG00000016382	-0.30116	0.14306
Nat10	ENSMUSG00000027185	-0.30108	0.090737
Gm9575	ENSMUSG00000083692	-0.30093	NA
Lpp	ENSMUSG00000033306	-0.30087	0.14541
Gtf3c3	ENSMUSG00000041303	-0.3007	0.056539
Otop1	ENSMUSG00000051596	-0.3007	NA
Hist1h4k	ENSMUSG00000064288	-0.30043	0.41204
Mycbp2	ENSMUSG00000033004	-0.30025	0.28039
Fastkd1	ENSMUSG00000027086	-0.30018	0.15553
Sv2c	ENSMUSG00000051111	-0.3001	0.37795
Entpd1	ENSMUSG00000048120	-0.30001	0.07453
Gm10478	ENSMUSG00000073179	-0.29995	0.37575
Mtif2	ENSMUSG00000020459	-0.2999	0.14628
Gad1	ENSMUSG00000070880	-0.2999	0.080207
9530036O11Rik	ENSMUSG00000097726	-0.29989	0.41186
Tsr1	ENSMUSG00000038335	-0.29969	0.30005
Dnal1	ENSMUSG00000042523	-0.2996	0.16882
Klhl10	ENSMUSG00000001558	-0.29956	NA
Zfp882	ENSMUSG00000089857	-0.29953	0.3746
Slc16a3	ENSMUSG00000025161	-0.2995	0.38279
Nlrx1	ENSMUSG00000032109	-0.29934	0.20755
Slit3	ENSMUSG00000056427	-0.29927	0.24101
Grem2	ENSMUSG00000050069	-0.29921	0.060906
Klhl28	ENSMUSG00000020948	-0.2992	0.41679
Syt10	ENSMUSG00000063260	-0.29915	0.40844
Ppp1r9a	ENSMUSG00000032827	-0.29913	0.12353
Tank	ENSMUSG00000064289	-0.29903	0.077265
Vps25	ENSMUSG00000078656	-0.29899	NA
Usp19	ENSMUSG00000006676	-0.29895	0.031926
Lclat1	ENSMUSG00000054469	-0.29895	0.13559
Txndc16	ENSMUSG00000021830	-0.29889	0.20392
Nipbl	ENSMUSG00000022141	-0.29865	0.341
Ddi2	ENSMUSG00000078515	-0.29864	0.20011
Fam171b	ENSMUSG00000048388	-0.29862	0.26335
Ldoc1l	ENSMUSG00000055745	-0.2986	0.050025
Adcy1	ENSMUSG00000020431	-0.29858	0.30586
Snx13	ENSMUSG00000020590	-0.29842	0.30332
Zfp125	ENSMUSG00000069755	-0.29841	0.37884
Rin1	ENSMUSG00000024883	-0.29835	0.18983
Tmem200a	ENSMUSG00000049420	-0.29831	0.21134
Scrn3	ENSMUSG00000008226	-0.2983	0.18262
Mphosph8	ENSMUSG00000079184	-0.2983	0.31444
Fam92b	ENSMUSG00000042269	-0.29822	0.4167
Sertad4	ENSMUSG00000016262	-0.29817	0.2222
Tnpo1	ENSMUSG00000009470	-0.29814	0.26495
Cbwd1	ENSMUSG00000024878	-0.29809	0.17938
Scai	ENSMUSG00000035236	-0.29806	0.2646
Gdap1	ENSMUSG00000025777	-0.29805	0.26645
Zfp407	ENSMUSG00000048410	-0.29802	0.28166
Heatr1	ENSMUSG00000050244	-0.29793	0.087838
Gm4969	ENSMUSG00000085601	-0.29784	NA
Gm8213	ENSMUSG00000082474	-0.29777	0.41679
4930579G18Rik	ENSMUSG00000040840	-0.29761	0.41922
Ap1g1	ENSMUSG00000031731	-0.2976	0.034538
Dlgap1	ENSMUSG00000003279	-0.29754	0.23525
Lpin2	ENSMUSG00000024052	-0.29751	0.15659
Fcrls	ENSMUSG00000015852	-0.29747	0.21827
Btbd7	ENSMUSG00000041702	-0.29746	0.40654
Gm17733	ENSMUSG00000097486	-0.29729	0.41794
Foxl2os	ENSMUSG00000097072	-0.2972	NA
Ahctf1	ENSMUSG00000026491	-0.29715	0.34678
Sla2	ENSMUSG00000027636	-0.2971	0.33734
Prss23	ENSMUSG00000039405	-0.29708	0.09889
Klk7	ENSMUSG00000030713	-0.29703	0.41797
Gria1	ENSMUSG00000020524	-0.297	0.14544
B230219D22Rik	ENSMUSG00000045767	-0.29687	0.29583
Ralgapa2	ENSMUSG00000037110	-0.29686	0.25863
Mtmr9	ENSMUSG00000035078	-0.29682	0.41679
Atp13a3	ENSMUSG00000022533	-0.29681	0.23814
Ncoa7	ENSMUSG00000039697	-0.29658	0.24399
Gng4	ENSMUSG00000021303	-0.29651	0.10233
Casp1	ENSMUSG00000025888	-0.29648	0.39356
Gm9522	ENSMUSG00000098021	-0.2963	NA
Zkscan8	ENSMUSG00000063894	-0.29621	0.26301
Pxk	ENSMUSG00000033885	-0.29619	0.0090422
Edem3	ENSMUSG00000043019	-0.2961	0.30177
Adam33	ENSMUSG00000027318	-0.29602	0.42218
4930520O04Rik	ENSMUSG00000074039	-0.29597	0.40034
Gm11190	ENSMUSG00000055045	-0.29586	NA
Snhg11	ENSMUSG00000044349	-0.29582	0.24639
Gm3002	ENSMUSG00000096793	-0.29559	NA
Atad2b	ENSMUSG00000052812	-0.29539	0.42295
Thada	ENSMUSG00000024251	-0.29533	0.16922
Bbs7	ENSMUSG00000037325	-0.29523	0.13912
Arhgap31	ENSMUSG00000022799	-0.29489	0.20661
Dcp2	ENSMUSG00000024472	-0.29485	0.050221
Dok3	ENSMUSG00000035711	-0.29484	0.36037
Kcnd3	ENSMUSG00000040896	-0.29483	0.27255
Fam120a	ENSMUSG00000038014	-0.29462	0.20144
Zmiz1	ENSMUSG00000007817	-0.2945	0.20744
Cbr2	ENSMUSG00000025150	-0.29443	0.41661
Ube2v2	ENSMUSG00000022674	-0.29442	0.11103
Kif3b	ENSMUSG00000027475	-0.29436	0.15215
Fam26f	ENSMUSG00000046031	-0.29425	NA
Ctgf	ENSMUSG00000019997	-0.29422	0.28523
Jmjd1c	ENSMUSG00000037876	-0.29411	0.28112
Shprh	ENSMUSG00000090112	-0.29406	0.24446
Adam21	ENSMUSG00000008438	-0.29399	0.42531
Rbl2	ENSMUSG00000031666	-0.29381	0.29202
Slc1a5	ENSMUSG00000001918	-0.29375	0.30023
Spcs3	ENSMUSG00000054408	-0.29374	0.009679
Pabpc4	ENSMUSG00000011257	-0.29371	0.028932
Gm26529	ENSMUSG00000097585	-0.29369	0.42637
RP24-211L16.3	ENSMUSG00000100319	-0.29369	NA
Gm26840	ENSMUSG00000097728	-0.29365	0.40921
Fnip1	ENSMUSG00000035992	-0.29362	0.24014
Lrp4	ENSMUSG00000027253	-0.29352	0.17379
F2rl3	ENSMUSG00000050147	-0.29351	0.42647
[truncated: 9,646 more rows]
