# Supplementary material for: Hippocampal transcriptome profiling reveals common disease pathways in chronic hypoperfusion and aging
Source: Aging (Albany NY). 2021 Jun 1;13(11):14651–74. doi: 10.18632/aging.203123 (PMC8221317; doi:10.18632/aging.203123)
Supplement: Supplementary Table 3B [file aging-13-203123-s005.xlsx]

## Sheet: Upregulated DEGs
Supplementary Table 3B. List of all differentially expressed (upregulated and downregulated) genes in mice subjected to 7 and 30 days of BCAS.
Gene Name	Gene ID	log2FoldChange	q-value
Fabp7	ENSMUSG00000019874	1.1298	1.988e-17
Opalin	ENSMUSG00000050121	1.1825	8.1078e-14
Pllp	ENSMUSG00000031775	0.92104	1.5526e-13
Mmp14	ENSMUSG00000000957	0.69515	1.2496e-11
Serpinb1a	ENSMUSG00000044734	0.86868	1.8698e-10
Lap3	ENSMUSG00000039682	0.43374	5.2786e-09
Gadd45g	ENSMUSG00000021453	0.58014	5.4423e-09
Padi2	ENSMUSG00000028927	0.4688	6.8111e-09
Id4	ENSMUSG00000021379	0.66693	1.9381e-08
Fosb	ENSMUSG00000003545	0.94227	2.5069e-08
Plat	ENSMUSG00000031538	0.52325	2.9368e-08
Insc	ENSMUSG00000048782	0.78079	3.5781e-08
Gpc3	ENSMUSG00000055653	0.8403	3.5781e-08
Gadd45b	ENSMUSG00000015312	0.7247	2.9989e-07
Tmem252	ENSMUSG00000048572	0.7652	2.9989e-07
Car2	ENSMUSG00000027562	0.29526	3.5414e-07
Hist1h1c	ENSMUSG00000036181	0.41842	1.1129e-06
Aif1l	ENSMUSG00000001864	0.62575	1.4937e-06
Fa2h	ENSMUSG00000033579	0.4313	3.0532e-06
Aspa	ENSMUSG00000020774	0.59867	5.9871e-06
2310022B05Rik	ENSMUSG00000031983	0.42687	1.0266e-05
4933407L21Rik	ENSMUSG00000026224	0.81811	1.0609e-05
Tmprss5	ENSMUSG00000032268	0.92298	1.7105e-05
Plk3	ENSMUSG00000028680	0.55916	2.4786e-05
Fos	ENSMUSG00000021250	0.90674	2.6383e-05
Sik1	ENSMUSG00000024042	0.68939	3.4271e-05
Gng11	ENSMUSG00000032766	0.54792	4.3879e-05
Junb	ENSMUSG00000052837	0.7955	4.5699e-05
Egr4	ENSMUSG00000071341	0.88921	4.5699e-05
Lpcat2	ENSMUSG00000033192	0.43574	5.1354e-05
Gm26721	ENSMUSG00000096943	0.72821	7.6439e-05
Arid5a	ENSMUSG00000037447	0.59366	7.7567e-05
Mcam	ENSMUSG00000032135	0.56444	8.8307e-05
Gkn3	ENSMUSG00000030048	0.88045	9.1245e-05
Nes	ENSMUSG00000004891	0.67839	9.5401e-05
Ngb	ENSMUSG00000021032	0.75176	0.00012193
Tspan14	ENSMUSG00000037824	0.35539	0.00019249
Emp2	ENSMUSG00000022505	0.32202	0.0002598
Msi1	ENSMUSG00000054256	0.47001	0.00028226
Nr4a2	ENSMUSG00000026826	0.52428	0.00029181
Atf3	ENSMUSG00000026628	0.80961	0.00031472
Sox3	ENSMUSG00000045179	0.72474	0.00037507
Lpar1	ENSMUSG00000038668	0.46935	0.00038953
Mid1ip1	ENSMUSG00000008035	0.51564	0.0004515
Klhdc8b	ENSMUSG00000032609	0.55065	0.00048093
Gm10561	ENSMUSG00000097649	0.67411	0.00050758
Myoc	ENSMUSG00000026697	0.66222	0.00052528
Pla2g16	ENSMUSG00000060675	0.32495	0.00055372
Prtn3	ENSMUSG00000057729	0.76719	0.00057356
Grtp1	ENSMUSG00000038515	0.62505	0.0006448
Efhd1	ENSMUSG00000026255	0.39928	0.0006894
Litaf	ENSMUSG00000022500	0.52992	0.00073255
Prr18	ENSMUSG00000055945	0.49211	0.00074375
Tspan15	ENSMUSG00000037031	0.41495	0.00077254
Arl4d	ENSMUSG00000034936	0.62287	0.00083025
Mmab	ENSMUSG00000029575	0.25424	0.00084189
Wnt4	ENSMUSG00000036856	0.55219	0.00088484
Myo1d	ENSMUSG00000035441	0.39469	0.00096154
Rbm3	ENSMUSG00000031167	0.42529	0.0010261
Spata24	ENSMUSG00000024352	0.52017	0.0011932
Trnau1ap	ENSMUSG00000028898	0.36358	0.0013102
Txnrd3	ENSMUSG00000000811	0.50133	0.0013483
Gpr3	ENSMUSG00000049649	0.49016	0.0014144
Gjb1	ENSMUSG00000047797	0.43661	0.0014345
Gm16006	ENSMUSG00000090002	0.76052	0.0016371
Phldb1	ENSMUSG00000048537	0.36304	0.0017971
Gpr37	ENSMUSG00000039904	0.40219	0.0017971
Pim3	ENSMUSG00000035828	0.4067	0.0017971
Dusp1	ENSMUSG00000024190	0.55356	0.0017971
A730036I17Rik	ENSMUSG00000056738	0.75356	0.0017971
Txndc5	ENSMUSG00000038991	0.25318	0.0018287
Per1	ENSMUSG00000020893	0.45627	0.0018287
Fam117a	ENSMUSG00000038893	0.53941	0.0018287
Kctd5	ENSMUSG00000016946	0.29231	0.001854
Krt9	ENSMUSG00000051617	0.33243	0.0019087
Frmd8	ENSMUSG00000024816	0.40559	0.001963
Ring1	ENSMUSG00000024325	0.44534	0.0020488
Cnp	ENSMUSG00000006782	0.4266	0.0023065
Fancc	ENSMUSG00000021461	0.46066	0.0023858
Vstm4	ENSMUSG00000050666	0.55083	0.0026758
Arsg	ENSMUSG00000020604	0.4057	0.0026837
Gltp	ENSMUSG00000011884	0.38211	0.002725
Sertad1	ENSMUSG00000008384	0.56164	0.002725
Plk5	ENSMUSG00000035486	0.6058	0.002725
Lig1	ENSMUSG00000056394	0.45129	0.0027758
Grm3	ENSMUSG00000003974	0.32297	0.0029471
Sox2ot	ENSMUSG00000090828	0.36312	0.0029471
S100a16	ENSMUSG00000074457	0.56018	0.0031201
Ccdc60	ENSMUSG00000043913	0.60781	0.0031201
Tril	ENSMUSG00000043496	0.36575	0.0033903
Hap1	ENSMUSG00000006930	0.37917	0.0033903
Asic4	ENSMUSG00000033007	0.44061	0.0033903
Gm266	ENSMUSG00000010529	0.65792	0.0033903
Col2a1	ENSMUSG00000022483	0.71349	0.0033903
Aqp9	ENSMUSG00000032204	0.62487	0.0036529
Hopx	ENSMUSG00000059325	0.43015	0.0036891
Rbm12	ENSMUSG00000089824	0.3927	0.0039452
Scnn1a	ENSMUSG00000030340	0.43934	0.0039452
Hdc	ENSMUSG00000027360	0.62323	0.0039452
Pcsk6	ENSMUSG00000030513	0.41409	0.0041263
Gprc5a	ENSMUSG00000046733	0.67317	0.0041945
Rasa4	ENSMUSG00000004952	0.48533	0.0042254
Ddr1	ENSMUSG00000003534	0.35065	0.0044542
Fgfr2	ENSMUSG00000030849	0.44461	0.0045403
Iqck	ENSMUSG00000073856	0.5715	0.0045403
Mbp	ENSMUSG00000041607	0.34338	0.0046497
Ptn	ENSMUSG00000029838	0.3428	0.0046879
Ier3	ENSMUSG00000003541	0.53862	0.0049373
Fbln7	ENSMUSG00000027386	0.50209	0.0049977
Mapk3	ENSMUSG00000063065	0.44719	0.00503
Ptk7	ENSMUSG00000023972	0.39633	0.0052499
Rftn2	ENSMUSG00000025978	0.2675	0.0057886
Krt77	ENSMUSG00000067594	0.45137	0.0061012
2310007L24Rik	ENSMUSG00000009210	0.68397	0.006227
Cmbl	ENSMUSG00000022235	0.44821	0.0064847
Bex4	ENSMUSG00000047844	0.42208	0.0066594
Cxcl5	ENSMUSG00000029371	0.67376	0.0071512
Gpsm1	ENSMUSG00000026930	0.33086	0.0071996
Cd9	ENSMUSG00000030342	0.33783	0.007269
1700001C02Rik	ENSMUSG00000029182	0.66711	0.007269
Kcnh4	ENSMUSG00000035355	0.58453	0.0076589
Ccdc184	ENSMUSG00000029875	0.49149	0.0078185
Etnk2	ENSMUSG00000070644	0.62114	0.0078185
Haus7	ENSMUSG00000031371	0.44151	0.007824
C1ql2	ENSMUSG00000036907	0.53336	0.007824
S100a6	ENSMUSG00000001025	0.57635	0.0078553
Mboat1	ENSMUSG00000038732	0.59308	0.0080961
Prrx2	ENSMUSG00000039476	0.62346	0.0080961
Ehbp1l1	ENSMUSG00000024937	0.40569	0.0081586
Slc14a2	ENSMUSG00000024552	0.63148	0.0082868
Ilvbl	ENSMUSG00000032763	0.37528	0.008499
Gsn	ENSMUSG00000026879	0.32941	0.0085037
Sytl2	ENSMUSG00000030616	0.42325	0.0085267
Odf3b	ENSMUSG00000047394	0.58309	0.0087865
Nkd1	ENSMUSG00000031661	0.38699	0.0089492
Blcap	ENSMUSG00000067787	0.20821	0.0096215
Cdc42ep4	ENSMUSG00000041598	0.30581	0.0097626
Sstr2	ENSMUSG00000047904	0.45347	0.010105
Nr4a1	ENSMUSG00000023034	0.59455	0.010257
Vegfc	ENSMUSG00000031520	0.5103	0.011143
Msmo1	ENSMUSG00000031604	0.24848	0.011449
Evi2a	ENSMUSG00000078771	0.3543	0.011574
Ttyh2	ENSMUSG00000034714	0.35675	0.011626
Slc8b1	ENSMUSG00000032754	0.48809	0.011657
Lmo4	ENSMUSG00000028266	0.27226	0.011868
Nfkbia	ENSMUSG00000021025	0.34242	0.01193
Palm3	ENSMUSG00000047986	0.42634	0.011975
Fam129b	ENSMUSG00000026796	0.30634	0.012229
Rgs20	ENSMUSG00000002459	0.36685	0.012268
Fjx1	ENSMUSG00000075012	0.3829	0.012385
Lbh	ENSMUSG00000024063	0.26343	0.013156
Slain1	ENSMUSG00000055717	0.33425	0.01535
Socs1	ENSMUSG00000038037	0.53324	0.01535
Gm10687	ENSMUSG00000097617	0.6266	0.01535
Arap1	ENSMUSG00000032812	0.29994	0.015666
Phkg1	ENSMUSG00000025537	0.32985	0.015823
Tmbim1	ENSMUSG00000006301	0.34798	0.015823
1700016K19Rik	ENSMUSG00000053783	0.5085	0.016016
Gjc2	ENSMUSG00000043448	0.44673	0.016148
S100b	ENSMUSG00000033208	0.20271	0.017424
Slc14a1	ENSMUSG00000059336	0.29108	0.017424
Gal3st1	ENSMUSG00000049721	0.45457	0.01752
1700016P03Rik	ENSMUSG00000085609	0.54991	0.017533
Rnaset2a	ENSMUSG00000095687	0.4001	0.017796
Cyr61	ENSMUSG00000028195	0.54578	0.018418
H2-K1	ENSMUSG00000061232	0.44852	0.018972
Dhcr7	ENSMUSG00000058454	0.28081	0.019098
Plekhf1	ENSMUSG00000074170	0.49776	0.019098
Nmral1	ENSMUSG00000063445	0.31858	0.019165
Egr1	ENSMUSG00000038418	0.5565	0.019165
Pygl	ENSMUSG00000021069	0.39013	0.01966
Cspg5	ENSMUSG00000032482	0.39934	0.019844
Sema6a	ENSMUSG00000019647	0.41321	0.019844
Gpr19	ENSMUSG00000032641	0.34986	0.020121
Slc16a1	ENSMUSG00000032902	0.39625	0.020121
Tmem243	ENSMUSG00000079659	0.42936	0.020121
Irf2bp2	ENSMUSG00000051495	0.40027	0.020561
Nek8	ENSMUSG00000017405	0.43284	0.0208
Gnai2	ENSMUSG00000032562	0.31424	0.020942
Bace2	ENSMUSG00000040605	0.53166	0.021491
BC005764	ENSMUSG00000035835	0.41707	0.021496
Col6a2	ENSMUSG00000020241	0.48434	0.021949
Gna12	ENSMUSG00000000149	0.37645	0.021982
Hmox1	ENSMUSG00000005413	0.41002	0.022029
Acat3	ENSMUSG00000062480	0.52184	0.022275
Chrm4	ENSMUSG00000040495	0.40936	0.022627
Pamr1	ENSMUSG00000027188	0.41271	0.022746
Coq10b	ENSMUSG00000025981	0.33108	0.022999
Lgmn	ENSMUSG00000021190	0.26898	0.023049
Cirbp	ENSMUSG00000045193	0.46281	0.023076
Pafah1b3	ENSMUSG00000005447	0.45953	0.023078
Scx	ENSMUSG00000034161	0.56324	0.02324
Icam2	ENSMUSG00000001029	0.53155	0.023411
Elf5	ENSMUSG00000027186	0.59767	0.023576
Sft2d1	ENSMUSG00000073468	0.31999	0.02378
BC026585	ENSMUSG00000033488	0.4175	0.023845
Trip6	ENSMUSG00000023348	0.44721	0.024239
Eml2	ENSMUSG00000040811	0.34858	0.024412
Tnc	ENSMUSG00000028364	0.58274	0.024556
Ppp1r14a	ENSMUSG00000037166	0.51437	0.024888
Pdk4	ENSMUSG00000019577	0.42901	0.024997
H2-Q4	ENSMUSG00000035929	0.5005	0.025801
Pxdc1	ENSMUSG00000021411	0.37973	0.026154
Prkd2	ENSMUSG00000041187	0.42984	0.026912
Zfp503	ENSMUSG00000039081	0.41426	0.026937
Pdia5	ENSMUSG00000022844	0.51691	0.02786
Mpc1	ENSMUSG00000023861	0.41713	0.028467
RP23-226D9.5	ENSMUSG00000100789	0.58723	0.028467
Gab1	ENSMUSG00000031714	0.28126	0.028599
Npas3	ENSMUSG00000021010	0.35342	0.029049
Qdpr	ENSMUSG00000015806	0.39085	0.029083
Rasl11a	ENSMUSG00000029641	0.43639	0.029496
Itgb4	ENSMUSG00000020758	0.46379	0.029593
1700084C01Rik	ENSMUSG00000070532	0.40518	0.029632
2004-09-01	ENSMUSG00000020486	0.44953	0.02992
Mog	ENSMUSG00000076439	0.3255	0.030063
Olfml1	ENSMUSG00000051041	0.32887	0.030248
Smad1	ENSMUSG00000031681	0.29734	0.030396
Aspg	ENSMUSG00000037686	0.48185	0.030846
Swap70	ENSMUSG00000031015	0.35919	0.031197
F3	ENSMUSG00000028128	0.23862	0.031445
Gramd3	ENSMUSG00000001700	0.32677	0.031541
Cela1	ENSMUSG00000023031	0.46407	0.031689
Acss1	ENSMUSG00000027452	0.23183	0.032079
Gadl1	ENSMUSG00000056880	0.57678	0.032151
Prdx1	ENSMUSG00000028691	0.27403	0.03224
Fxyd6	ENSMUSG00000066705	0.37578	0.03248
H2-Q7	ENSMUSG00000060550	0.56871	0.03248
Errfi1	ENSMUSG00000028967	0.35489	0.033158
Cnn3	ENSMUSG00000053931	0.24782	0.033234
Ppp1r32	ENSMUSG00000035179	0.50915	0.033973
Klk6	ENSMUSG00000050063	0.56779	0.034012
Doc2g	ENSMUSG00000024871	0.54279	0.034902
Traf1	ENSMUSG00000026875	0.55267	0.035299
0610040B10Rik	ENSMUSG00000089889	0.51542	0.03564
Polr3e	ENSMUSG00000030880	0.22993	0.035842
Ggta1	ENSMUSG00000035778	0.4404	0.036087
0610040J01Rik	ENSMUSG00000060512	0.34205	0.036195
Bcl7c	ENSMUSG00000030814	0.47801	0.036195
Cnn2	ENSMUSG00000004665	0.43323	0.036329
Ass1	ENSMUSG00000076441	0.39604	0.036337
RP24-531B21.1	ENSMUSG00000100837	0.53954	0.037023
Klf4	ENSMUSG00000003032	0.46708	0.037563
S1pr1	ENSMUSG00000045092	0.30591	0.037917
Mob3b	ENSMUSG00000073910	0.4679	0.037917
Nkain1	ENSMUSG00000078532	0.23764	0.038003
Gpr153	ENSMUSG00000042804	0.50575	0.038389
Xrcc3	ENSMUSG00000021287	0.42316	0.039185
Egr2	ENSMUSG00000037868	0.51943	0.039335
Sncg	ENSMUSG00000023064	0.55655	0.039335
1110007C09Rik	ENSMUSG00000037960	0.41969	0.039943
Rbks	ENSMUSG00000029136	0.47446	0.040107
Tsnaxip1	ENSMUSG00000031893	0.56062	0.040107
Nipsnap3b	ENSMUSG00000015247	0.26704	0.040307
Mif4gd	ENSMUSG00000020743	0.37755	0.040473
Rarres2	ENSMUSG00000009281	0.44718	0.041627
Efnb3	ENSMUSG00000003934	0.25946	0.042069
Tmem100	ENSMUSG00000069763	0.31018	0.042984
Sash3	ENSMUSG00000031101	0.45558	0.042984
Lasp1	ENSMUSG00000038366	0.19877	0.042985
2410006H16Rik	ENSMUSG00000086841	0.389	0.043615
Dnajc12	ENSMUSG00000036764	0.25281	0.044368
S100a10	ENSMUSG00000041959	0.35543	0.044575
Fam69c	ENSMUSG00000047992	0.41474	0.044575
Anxa5	ENSMUSG00000027712	0.31257	0.044871
Calb2	ENSMUSG00000003657	0.53057	0.044985
Hmgb2	ENSMUSG00000054717	0.43079	0.045291
Pik3ip1	ENSMUSG00000034614	0.269	0.046426
Pvrl2	ENSMUSG00000062300	0.46515	0.046673
Kcnk13	ENSMUSG00000045404	0.34986	0.047174
Pdgfrl	ENSMUSG00000031595	0.47736	0.048297
Myo1g	ENSMUSG00000020437	0.5471	0.048326
Gm101	ENSMUSG00000036962	0.53921	0.048834
Resp18	ENSMUSG00000033061	0.38511	0.049115
Lrrc43	ENSMUSG00000063409	0.52904	0.049115
Cmss1	ENSMUSG00000022748	0.29778	0.049142
Med30	ENSMUSG00000038622	0.30212	0.049353
Tm4sf1	ENSMUSG00000027800	0.39351	0.049538
Maged2	ENSMUSG00000025268	0.23853	0.049755
Bdh2	ENSMUSG00000028167	0.45227	0.05025
Fnbp1	ENSMUSG00000075415	0.31472	0.050841
Fahd2a	ENSMUSG00000027371	0.31919	0.051191
Pnck	ENSMUSG00000002012	0.3697	0.051358
Nab2	ENSMUSG00000025402	0.41494	0.051659
Ak8	ENSMUSG00000026807	0.45579	0.051659
Scrn2	ENSMUSG00000020877	0.47499	0.051659
Ccdc153	ENSMUSG00000070306	0.54062	0.051659
2810459M11Rik	ENSMUSG00000026227	0.40411	0.05197
Pltp	ENSMUSG00000017754	0.42585	0.053047
Iqcd	ENSMUSG00000029601	0.49373	0.053047
Rfx4	ENSMUSG00000020037	0.39417	0.053558
Otof	ENSMUSG00000062372	0.40384	0.053558
1700009P17Rik	ENSMUSG00000026649	0.52083	0.053558
Foxo6	ENSMUSG00000052135	0.49912	0.053574
Ednrb	ENSMUSG00000022122	0.29514	0.053783
Adamtsl4	ENSMUSG00000015850	0.36037	0.053927
Sap30	ENSMUSG00000031609	0.38795	0.054021
Marcksl1	ENSMUSG00000047945	0.33155	0.054292
Slc7a3	ENSMUSG00000031297	0.38578	0.055983
Asb4	ENSMUSG00000042607	0.53414	0.055983
Il33	ENSMUSG00000024810	0.29962	0.056074
Bambi	ENSMUSG00000024232	0.31394	0.057941
Galnt6	ENSMUSG00000037280	0.32192	0.057941
Gm12166	ENSMUSG00000069899	0.37554	0.057941
Rps6ka1	ENSMUSG00000003644	0.32294	0.058487
Dmkn	ENSMUSG00000060962	0.51451	0.058487
Plin2	ENSMUSG00000028494	0.33783	0.058577
Ddit4	ENSMUSG00000020108	0.36054	0.058661
Pawr	ENSMUSG00000035873	0.38097	0.058661
Wnt7a	ENSMUSG00000030093	0.30461	0.059108
Bex1	ENSMUSG00000050071	0.42576	0.059324
Pacsin3	ENSMUSG00000027257	0.41317	0.060961
1600029I14Rik	ENSMUSG00000046242	0.52641	0.060983
Gm12326	ENSMUSG00000085251	0.5194	0.061002
Sat1	ENSMUSG00000025283	0.28059	0.061069
Ccdc13	ENSMUSG00000079235	0.38618	0.061069
Lta4h	ENSMUSG00000015889	0.20422	0.061184
Tprkb	ENSMUSG00000054226	0.25656	0.061184
Epb4.1l4a	ENSMUSG00000024376	0.2973	0.061184
Sirt5	ENSMUSG00000054021	0.32296	0.061184
Aif1	ENSMUSG00000024397	0.42027	0.061184
2410004P03Rik	ENSMUSG00000071398	0.51454	0.061184
Msln	ENSMUSG00000063011	0.52576	0.061184
Mafk	ENSMUSG00000018143	0.31904	0.061747
Lamb3	ENSMUSG00000026639	0.41676	0.06182
Fam120aos	ENSMUSG00000097059	0.27187	0.061967
Ch25h	ENSMUSG00000050370	0.51214	0.062052
Apold1	ENSMUSG00000090698	0.48844	0.062065
Tcf3	ENSMUSG00000020167	0.34388	0.062515
Abhd11os	ENSMUSG00000085042	0.40559	0.062942
Krt19	ENSMUSG00000020911	0.5063	0.063444
Gm2694	ENSMUSG00000097248	0.49606	0.06405
Slc36a2	ENSMUSG00000020264	0.51396	0.06405
Tmeff2	ENSMUSG00000026109	0.19839	0.064214
Fgfrl1	ENSMUSG00000008090	0.3322	0.064574
Cpn1	ENSMUSG00000025196	0.51971	0.064574
Vat1	ENSMUSG00000034993	0.32477	0.064726
Rab3il1	ENSMUSG00000024663	0.26954	0.06491
Myom3	ENSMUSG00000037139	0.44543	0.064972
Pacrg	ENSMUSG00000037196	0.32396	0.065145
Vasp	ENSMUSG00000030403	0.26756	0.065289
Nuf2	ENSMUSG00000026683	0.3581	0.065721
Ece2	ENSMUSG00000022842	0.25504	0.066125
Hadh	ENSMUSG00000027984	0.21116	0.066735
Ahcy	ENSMUSG00000027597	0.24149	0.066735
B230206L02Rik	ENSMUSG00000086003	0.49888	0.066735
F12	ENSMUSG00000021492	0.51704	0.066735
Adcy8	ENSMUSG00000022376	0.37016	0.066922
Phf13	ENSMUSG00000047777	0.366	0.067225
Ush1g	ENSMUSG00000045288	0.48383	0.067262
Mag	ENSMUSG00000036634	0.37947	0.067876
Fus	ENSMUSG00000030795	0.20252	0.068003
H1f0	ENSMUSG00000096210	0.1581	0.068328
Pdgfa	ENSMUSG00000025856	0.22735	0.069294
Cd63	ENSMUSG00000025351	0.34449	0.069294
1500012F01Rik	ENSMUSG00000074578	0.36733	0.070268
Alas2	ENSMUSG00000025270	0.46551	0.070822
Efnb1	ENSMUSG00000031217	0.27963	0.072182
Crtap	ENSMUSG00000032431	0.35048	0.072423
Txnip	ENSMUSG00000038393	0.41085	0.073476
Tceal1	ENSMUSG00000049536	0.25668	0.073956
Cyp51	ENSMUSG00000001467	0.22633	0.074569
Crygn	ENSMUSG00000038135	0.48785	0.07472
Thsd1	ENSMUSG00000031480	0.3716	0.07704
Kif19a	ENSMUSG00000010021	0.35464	0.077349
Gzmm	ENSMUSG00000054206	0.43633	0.077349
Rhoc	ENSMUSG00000002233	0.37381	0.077752
Rtp4	ENSMUSG00000033355	0.4404	0.077752
Ly6g6f	ENSMUSG00000034923	0.50202	0.077752
Gipc2	ENSMUSG00000039131	0.50487	0.077752
Htra3	ENSMUSG00000029096	0.38547	0.078241
Wdyhv1	ENSMUSG00000022359	0.23509	0.078599
Ly86	ENSMUSG00000021423	0.27853	0.07869
Sh3gl3	ENSMUSG00000030638	0.21668	0.079041
Rapsn	ENSMUSG00000002104	0.49278	0.079041
Irf7	ENSMUSG00000025498	0.43467	0.079701
Gm6265	ENSMUSG00000066491	0.49039	0.079749
Ifi27l2a	ENSMUSG00000079017	0.50196	0.080196
Steap3	ENSMUSG00000026389	0.24414	0.080246
Gdpd2	ENSMUSG00000019359	0.37979	0.081379
1700007K13Rik	ENSMUSG00000026831	0.4197	0.081379
Lsp1	ENSMUSG00000018819	0.43603	0.081379
Mmp11	ENSMUSG00000000901	0.4389	0.081379
Tnfrsf22	ENSMUSG00000010751	0.45291	0.081379
Icam1	ENSMUSG00000037405	0.48287	0.081379
Rassf7	ENSMUSG00000038618	0.46681	0.081834
Aacs	ENSMUSG00000029482	0.25457	0.081841
Llgl1	ENSMUSG00000020536	0.1978	0.083058
Ccdc78	ENSMUSG00000071202	0.48567	0.083979
Spsb2	ENSMUSG00000038451	0.41582	0.084683
A830052D11Rik	ENSMUSG00000097413	0.46072	0.085097
Ndrg1	ENSMUSG00000005125	0.26077	0.085192
Asgr1	ENSMUSG00000020884	0.49419	0.086235
Wdr34	ENSMUSG00000039715	0.29189	0.08655
Utp14b	ENSMUSG00000079470	0.42384	0.08765
Itga2b	ENSMUSG00000034664	0.43217	0.08765
Grhl2	ENSMUSG00000022286	0.47502	0.087735
Dusp5	ENSMUSG00000034765	0.41528	0.087758
Bpifb1	ENSMUSG00000027485	0.46885	0.087968
Enkur	ENSMUSG00000026679	0.44288	0.088785
Dbi	ENSMUSG00000026385	0.31583	0.089422
Lpcat3	ENSMUSG00000004270	0.2086	0.089495
Pdlim2	ENSMUSG00000022090	0.38491	0.089495
Slc26a8	ENSMUSG00000036196	0.3758	0.0896
Arhgef40	ENSMUSG00000004562	0.20911	0.090378
Pdpn	ENSMUSG00000028583	0.26421	0.090378
Snapin	ENSMUSG00000001018	0.1904	0.091443
Nr4a3	ENSMUSG00000028341	0.38581	0.091443
Mb	ENSMUSG00000018893	0.48465	0.091443
Baiap3	ENSMUSG00000047507	0.47298	0.091706
Cd82	ENSMUSG00000027215	0.31798	0.092217
Relb	ENSMUSG00000002983	0.41606	0.09234
Gm13031	ENSMUSG00000087698	0.44735	0.09234
Pttg1	ENSMUSG00000020415	0.31784	0.092348
Prkcdbp	ENSMUSG00000037060	0.38586	0.093743
Tex30	ENSMUSG00000026049	0.41057	0.094663
Gatm	ENSMUSG00000027199	0.26249	0.095045
Barhl2	ENSMUSG00000034384	0.44927	0.095279
Slc38a3	ENSMUSG00000010064	0.3235	0.095829
Zfp467	ENSMUSG00000068551	0.32814	0.095832
Alyref	ENSMUSG00000025134	0.30901	0.096015
2810468N07Rik	ENSMUSG00000091475	0.38101	0.096015
Pdzd3	ENSMUSG00000032105	0.40296	0.096015
Pipox	ENSMUSG00000017453	0.4616	0.096015
Rgcc	ENSMUSG00000022018	0.38353	0.096457
Tacc3	ENSMUSG00000037313	0.30841	0.096537
Slc5a5	ENSMUSG00000000792	0.32723	0.096676
Pld2	ENSMUSG00000020828	0.30091	0.096702
Sp3os	ENSMUSG00000063714	0.31923	0.097146
Ccdc33	ENSMUSG00000037716	0.47789	0.097146
Hnrnpdl	ENSMUSG00000029328	0.25204	0.097323
Arrdc1	ENSMUSG00000026972	0.39642	0.097323
Tsen34	ENSMUSG00000035585	0.36349	0.097604
6430573F11Rik	ENSMUSG00000039620	0.32761	0.097849
Rnf7	ENSMUSG00000051234	0.22044	0.098408
Pde1b	ENSMUSG00000022489	0.23536	0.098472
Mapk15	ENSMUSG00000063704	0.47406	0.098633
5930412G12Rik	ENSMUSG00000072591	0.42127	0.10013
Tnfaip6	ENSMUSG00000053475	0.37142	0.10031
Tinagl1	ENSMUSG00000028776	0.44472	0.10102
St3gal1	ENSMUSG00000013846	0.31815	0.10316
L3hypdh	ENSMUSG00000019718	0.40777	0.10374
5031439G07Rik	ENSMUSG00000036046	0.21778	0.10409
Mvd	ENSMUSG00000006517	0.40863	0.10433
Ugp2	ENSMUSG00000001891	0.20394	0.10449
Paqr6	ENSMUSG00000041423	0.44069	0.10544
Slc16a11	ENSMUSG00000040938	0.39256	0.10553
Ppap2c	ENSMUSG00000052151	0.37675	0.10593
RP23-281H4.5	ENSMUSG00000101655	0.46546	0.10609
Emr1	ENSMUSG00000004730	0.28128	0.10633
Crnde	ENSMUSG00000031736	0.46385	0.10633
Pak6	ENSMUSG00000074923	0.22207	0.10655
Nkx2-2	ENSMUSG00000027434	0.34307	0.10655
Ntn5	ENSMUSG00000070564	0.39742	0.10655
Kazald1	ENSMUSG00000025213	0.39835	0.10655
BC024139	ENSMUSG00000044361	0.43486	0.10655
Tst	ENSMUSG00000044986	0.40798	0.10708
Polr3d	ENSMUSG00000000776	0.25372	0.10727
BC006965	ENSMUSG00000041674	0.46329	0.10727
Ephx4	ENSMUSG00000033805	0.22818	0.10767
Irx3	ENSMUSG00000031734	0.45436	0.10767
Col9a1	ENSMUSG00000026147	0.45987	0.10767
Cuedc1	ENSMUSG00000018378	0.22068	0.10784
Pgm5	ENSMUSG00000041731	0.34654	0.10788
Rnaset2b	ENSMUSG00000094724	0.30493	0.10987
Ptx3	ENSMUSG00000027832	0.42904	0.11046
Fam221a	ENSMUSG00000047115	0.45674	0.11046
Fam189a2	ENSMUSG00000071604	0.30055	0.11177
B230217O12Rik	ENSMUSG00000097785	0.29096	0.11229
E130309F12Rik	ENSMUSG00000063446	0.30769	0.11229
Ypel1	ENSMUSG00000022773	0.21324	0.11323
H2-D1	ENSMUSG00000073411	0.32841	0.11422
Dhrs13	ENSMUSG00000020834	0.37174	0.11422
AW121686	ENSMUSG00000097301	0.4112	0.11501
Acsf2	ENSMUSG00000076435	0.20233	0.11521
Itm2c	ENSMUSG00000026223	0.26839	0.11521
Tmem80	ENSMUSG00000025505	0.25843	0.11551
Rorb	ENSMUSG00000036192	0.32932	0.11579
Rspo1	ENSMUSG00000028871	0.42899	0.11598
Abt1	ENSMUSG00000036376	0.21518	0.11623
Gas5	ENSMUSG00000053332	0.27534	0.11623
Bcas1	ENSMUSG00000013523	0.27535	0.11623
Col5a1	ENSMUSG00000026837	0.34952	0.11623
Rexo2	ENSMUSG00000032026	0.15809	0.11654
D930028M14Rik	ENSMUSG00000074274	0.44091	0.11662
Hes6	ENSMUSG00000067071	0.37872	0.1173
Atoh8	ENSMUSG00000037621	0.39422	0.1173
Gm12198	ENSMUSG00000085564	0.43671	0.11733
Tfr2	ENSMUSG00000029716	0.3024	0.11873
Frem2	ENSMUSG00000037016	0.40287	0.11933
Ctnnbip1	ENSMUSG00000028988	0.21715	0.11942
Birc7	ENSMUSG00000038840	0.46015	0.11945
Apopt1	ENSMUSG00000037787	0.19447	0.1198
Gm20515	ENSMUSG00000092242	0.45511	0.1198
Dnd1	ENSMUSG00000044595	0.41298	0.12013
Pxn	ENSMUSG00000029528	0.19844	0.12114
Egfl8	ENSMUSG00000015467	0.44962	0.12136
Hmgb3	ENSMUSG00000015217	0.29289	0.12168
Oat	ENSMUSG00000030934	0.14688	0.12195
Smim11	ENSMUSG00000051989	0.32616	0.12195
Rac3	ENSMUSG00000018012	0.31963	0.12396
Slc39a8	ENSMUSG00000053897	0.35105	0.12405
Spint2	ENSMUSG00000074227	0.36307	0.12405
Dnah10	ENSMUSG00000038011	0.44432	0.12405
Fam124a	ENSMUSG00000035184	0.20983	0.12409
Tmem55b	ENSMUSG00000035953	0.22834	0.12502
Rhebl1	ENSMUSG00000023755	0.33092	0.12502
Kank2	ENSMUSG00000032194	0.23108	0.12526
Tmem212	ENSMUSG00000043164	0.45498	0.12558
Tmem98	ENSMUSG00000035413	0.24195	0.12584
Mthfd1l	ENSMUSG00000040675	0.20494	0.12671
Fgfbp3	ENSMUSG00000047632	0.33534	0.12671
H2-M3	ENSMUSG00000016206	0.39247	0.12685
Ankrd66	ENSMUSG00000096140	0.45377	0.12704
Jund	ENSMUSG00000071076	0.38048	0.12802
Gm15706	ENSMUSG00000086013	0.38052	0.12846
Dnajb2	ENSMUSG00000026203	0.31676	0.12879
Dap	ENSMUSG00000039168	0.35139	0.12879
Cd44	ENSMUSG00000005087	0.41897	0.12884
Prr5l	ENSMUSG00000032841	0.26715	0.12895
Kcnmb1	ENSMUSG00000020155	0.38041	0.12895
Tmem74b	ENSMUSG00000044364	0.38073	0.12963
Gm13293	ENSMUSG00000086006	0.45062	0.12965
Ier2	ENSMUSG00000053560	0.34786	0.12999
Lhfpl5	ENSMUSG00000062252	0.35125	0.12999
Hbb-bt	ENSMUSG00000073940	0.35439	0.13016
Inhbb	ENSMUSG00000037035	0.33109	0.13083
Kcnd3os	ENSMUSG00000074346	0.40722	0.13155
Colq	ENSMUSG00000057606	0.44887	0.1316
Myl12a	ENSMUSG00000024048	0.24671	0.13246
Crhr1	ENSMUSG00000018634	0.3496	0.13246
Ttc22	ENSMUSG00000034919	0.40344	0.13246
Icosl	ENSMUSG00000000732	0.28483	0.13307
Krt2	ENSMUSG00000064201	0.33655	0.13315
Emd	ENSMUSG00000001964	0.26058	0.13319
Ciart	ENSMUSG00000038550	0.30823	0.13376
Prima1	ENSMUSG00000041669	0.40317	0.13381
Dapp1	ENSMUSG00000028159	0.33587	0.13392
Ddah2	ENSMUSG00000007039	0.37309	0.13408
Gm11974	ENSMUSG00000085156	0.40991	0.13408
Wdr6	ENSMUSG00000066357	0.25818	0.13461
Sp100	ENSMUSG00000026222	0.36884	0.13501
Gm13408	ENSMUSG00000081992	0.41298	0.13505
Mknk2	ENSMUSG00000020190	0.24804	0.13543
Nnat	ENSMUSG00000067786	0.31551	0.13543
Rnf5	ENSMUSG00000015478	0.27347	0.13582
2410004N09Rik	ENSMUSG00000087590	0.37413	0.13696
Tmem125	ENSMUSG00000050854	0.32496	0.13698
Ube2e3	ENSMUSG00000027011	0.15431	0.13733
Col16a1	ENSMUSG00000040690	0.25808	0.13794
Mnd1	ENSMUSG00000033752	0.44009	0.13794
Krt80	ENSMUSG00000037185	0.4423	0.13822
Gm13530	ENSMUSG00000086939	0.42642	0.13892
Rpl17-ps5	ENSMUSG00000081855	0.43792	0.13955
Hs3st6	ENSMUSG00000039628	0.44306	0.13955
Hmgcs1	ENSMUSG00000093930	0.19559	0.14024
Slc25a18	ENSMUSG00000004902	0.31161	0.14024
Tnni1	ENSMUSG00000026418	0.33853	0.14024
Ebf4	ENSMUSG00000053552	0.33807	0.14087
Asmt	ENSMUSG00000093806	0.34814	0.14087
Aebp1	ENSMUSG00000020473	0.37547	0.14104
Hook2	ENSMUSG00000052566	0.23454	0.14128
Igtp	ENSMUSG00000078853	0.3442	0.14165
Smco4	ENSMUSG00000058173	0.31087	0.1418
Zcchc12	ENSMUSG00000036699	0.34957	0.14302
Marcks	ENSMUSG00000069662	0.18389	0.14327
Klf16	ENSMUSG00000035397	0.31437	0.14357
Rgs2	ENSMUSG00000026360	0.16227	0.14367
Rfc3	ENSMUSG00000033970	0.27898	0.14371
Tmem109	ENSMUSG00000034659	0.27542	0.1454
Btd	ENSMUSG00000021900	0.29091	0.14541
Klhdc9	ENSMUSG00000045259	0.33274	0.14541
Rab13	ENSMUSG00000027935	0.34871	0.14541
Acads	ENSMUSG00000029545	0.35279	0.14541
Gch1	ENSMUSG00000037580	0.38522	0.14541
A930003A15Rik	ENSMUSG00000075330	0.438	0.14541
Igsf1	ENSMUSG00000031111	0.37817	0.14598
Lrrc75a	ENSMUSG00000046417	0.41195	0.14662
Agpat2	ENSMUSG00000026922	0.36933	0.14772
Unc5b	ENSMUSG00000020099	0.29635	0.14857
A830009L08Rik	ENSMUSG00000097182	0.41634	0.14861
Cldn19	ENSMUSG00000066058	0.43044	0.14861
Kiss1r	ENSMUSG00000035773	0.28328	0.14963
Fam163a	ENSMUSG00000015484	0.25329	0.14992
Dnajc24	ENSMUSG00000027166	0.26173	0.14992
Tead2	ENSMUSG00000030796	0.2955	0.14992
E130114P18Rik	ENSMUSG00000048747	0.30015	0.15017
Tmem51	ENSMUSG00000040616	0.3332	0.15017
Tox2	ENSMUSG00000074607	0.21728	0.15029
Notum	ENSMUSG00000042988	0.40637	0.15029
Pccb	ENSMUSG00000032527	0.13488	0.15097
Tjp2	ENSMUSG00000024812	0.27719	0.1527
Il18	ENSMUSG00000039217	0.23669	0.15318
Hpcal1	ENSMUSG00000071379	0.23944	0.1535
Btbd19	ENSMUSG00000073771	0.26446	0.15493
Tmem63a	ENSMUSG00000026519	0.31627	0.1561
Htr7	ENSMUSG00000024798	0.30315	0.15639
Dnaic1	ENSMUSG00000061322	0.35743	0.15639
Zfyve21	ENSMUSG00000021286	0.29522	0.15658
Celf3	ENSMUSG00000028137	0.21608	0.15688
Med20	ENSMUSG00000092558	0.24734	0.15721
Atf4	ENSMUSG00000042406	0.15498	0.15744
Cadm4	ENSMUSG00000054793	0.28377	0.15751
Gpn2	ENSMUSG00000028848	0.34158	0.15751
Epha2	ENSMUSG00000006445	0.37624	0.15751
Siah2	ENSMUSG00000036432	0.31225	0.15791
Unc119	ENSMUSG00000002058	0.3401	0.15791
Foxj1	ENSMUSG00000034227	0.3634	0.15791
Tmem171	ENSMUSG00000052485	0.42561	0.15791
Tagln2	ENSMUSG00000026547	0.3274	0.15797
Pnma3	ENSMUSG00000046287	0.16618	0.15844
Slc12a8	ENSMUSG00000035506	0.37257	0.15844
Gm10863	ENSMUSG00000075555	0.42721	0.15844
Acr	ENSMUSG00000022622	0.42371	0.15876
Casq2	ENSMUSG00000027861	0.39041	0.15887
Pcsk4	ENSMUSG00000020131	0.40387	0.15931
Anxa2	ENSMUSG00000032231	0.32582	0.15976
Cbx7	ENSMUSG00000053411	0.15702	0.16033
Itm2a	ENSMUSG00000031239	0.22701	0.16061
Man2b2	ENSMUSG00000029119	0.21714	0.16149
Tma7-ps	ENSMUSG00000059058	0.39643	0.16156
Gm7336	ENSMUSG00000078636	0.42512	0.16162
Herpud1	ENSMUSG00000031770	0.21723	0.16181
Zfp474	ENSMUSG00000046886	0.42203	0.16274
Lacc1	ENSMUSG00000044350	0.33289	0.16337
Fam43a	ENSMUSG00000046546	0.27795	0.16423
Rpl21-ps15	ENSMUSG00000083596	0.4227	0.16456
Cirh1a	ENSMUSG00000041438	0.18011	0.16508
Il3ra	ENSMUSG00000068758	0.40224	0.16519
Lyar	ENSMUSG00000067367	0.26073	0.16544
Ltb	ENSMUSG00000024399	0.41094	0.16638
Clic1	ENSMUSG00000007041	0.31219	0.16681
Reep4	ENSMUSG00000033589	0.33628	0.16683
Dok2	ENSMUSG00000022102	0.42124	0.16696
Slc8a3	ENSMUSG00000079055	0.31379	0.16764
Aldh3b2	ENSMUSG00000075296	0.37654	0.16773
Plekhb1	ENSMUSG00000030701	0.25411	0.16874
1700024G13Rik	ENSMUSG00000072473	0.38898	0.16932
H2-Ab1	ENSMUSG00000073421	0.40818	0.16932
Fam50a	ENSMUSG00000001962	0.24392	0.16947
Slc37a1	ENSMUSG00000024036	0.25259	0.16947
Dpf1	ENSMUSG00000030584	0.28209	0.16947
Zfp423	ENSMUSG00000045333	0.29261	0.16947
Zyx	ENSMUSG00000029860	0.30304	0.16947
Timm17b	ENSMUSG00000031158	0.30646	0.16947
1810010H24Rik	ENSMUSG00000078607	0.33139	0.16947
6820408C15Rik	ENSMUSG00000032680	0.33426	0.16947
Vwa1	ENSMUSG00000042116	0.34234	0.16947
Gm166	ENSMUSG00000057176	0.24938	0.16981
Nsdhl	ENSMUSG00000031349	0.18494	0.17012
C130074G19Rik	ENSMUSG00000039349	0.35981	0.17029
Psmb9	ENSMUSG00000096727	0.38042	0.17092
Mri1	ENSMUSG00000004996	0.33385	0.17149
Tprn	ENSMUSG00000048707	0.29457	0.17164
Gm12338	ENSMUSG00000081485	0.3741	0.17224
Abtb2	ENSMUSG00000032724	0.20684	0.17263
Gm12033	ENSMUSG00000078965	0.41497	0.17263
Mdk	ENSMUSG00000027239	0.35388	0.17319
2310009B15Rik	ENSMUSG00000079283	0.32437	0.17343
Pole3	ENSMUSG00000028394	0.14808	0.17488
Srebf1	ENSMUSG00000020538	0.21942	0.17488
Tctex1d2	ENSMUSG00000014075	0.25861	0.17578
Tmc6	ENSMUSG00000025572	0.26381	0.17578
Dnttip1	ENSMUSG00000017299	0.21189	0.17669
Psph	ENSMUSG00000029446	0.17235	0.17703
2810029C07Rik	ENSMUSG00000096995	0.29058	0.17897
Slc22a3	ENSMUSG00000023828	0.41152	0.17931
Nkx6-2	ENSMUSG00000041309	0.28521	0.17932
Dll3	ENSMUSG00000003436	0.38934	0.17936
Tmem106c	ENSMUSG00000052369	0.25438	0.17977
Ankrd54	ENSMUSG00000033055	0.31431	0.17977
Gadd45a	ENSMUSG00000036390	0.33277	0.18034
RP24-131B6.1	ENSMUSG00000100147	0.33862	0.18039
Gm14150	ENSMUSG00000082809	0.40119	0.18051
Mgst1	ENSMUSG00000008540	0.30641	0.18097
Ttll9	ENSMUSG00000074673	0.39933	0.18116
Slc52a3	ENSMUSG00000027463	0.36584	0.18248
Sema4g	ENSMUSG00000025207	0.21252	0.18307
Spsb1	ENSMUSG00000039911	0.23813	0.18311
Glipr2	ENSMUSG00000028480	0.33124	0.18318
4933440N22Rik	ENSMUSG00000042087	0.40639	0.18318
Flt3l	ENSMUSG00000089989	0.40717	0.18318
2810408M09Rik	ENSMUSG00000039725	0.2133	0.18383
Ccs	ENSMUSG00000034108	0.33212	0.18383
Plaur	ENSMUSG00000046223	0.40567	0.18383
Clec3b	ENSMUSG00000025784	0.37795	0.18441
Ecscr	ENSMUSG00000073599	0.35969	0.18447
Rasl10a	ENSMUSG00000034209	0.35842	0.18512
5430435G22Rik	ENSMUSG00000052688	0.36342	0.18512
3300002A11Rik	ENSMUSG00000033731	0.40774	0.18517
2011-03-01	ENSMUSG00000022269	0.25231	0.1852
Pcbd1	ENSMUSG00000020098	0.32004	0.18523
Nipal4	ENSMUSG00000020411	0.30657	0.18629
Ube2d1	ENSMUSG00000019927	0.14612	0.18701
Serpind1	ENSMUSG00000022766	0.39617	0.18701
Ewsr1	ENSMUSG00000009079	0.19285	0.18714
Haghl	ENSMUSG00000061046	0.30779	0.18714
Slc7a6os	ENSMUSG00000033106	0.20532	0.18777
Snx15	ENSMUSG00000024787	0.27741	0.18803
Pold2	ENSMUSG00000020471	0.32965	0.18803
Fpgs	ENSMUSG00000009566	0.3248	0.18809
Trappc6a	ENSMUSG00000002043	0.35741	0.19006
Slc6a13	ENSMUSG00000030108	0.3939	0.19006
Fam204a	ENSMUSG00000057858	0.21786	0.19009
Fdps	ENSMUSG00000059743	0.29342	0.19022
Kcne1l	ENSMUSG00000090122	0.30771	0.19026
Lgals3bp	ENSMUSG00000033880	0.25186	0.19029
Nudt1	ENSMUSG00000036639	0.34327	0.19029
Gm26894	ENSMUSG00000097453	0.40437	0.19029
Leprot	ENSMUSG00000035212	0.17362	0.19125
Sptssa	ENSMUSG00000044408	0.19303	0.1914
Stx2	ENSMUSG00000029428	0.19395	0.1914
Arhgef16	ENSMUSG00000029032	0.40327	0.1914
Naaa	ENSMUSG00000029413	0.18694	0.19178
Ptpn20	ENSMUSG00000021940	0.4028	0.19219
Serpinh1	ENSMUSG00000070436	0.22395	0.19251
Tspan33	ENSMUSG00000001763	0.24288	0.19251
Tmem159	ENSMUSG00000030917	0.24977	0.19251
Pax6	ENSMUSG00000027168	0.28575	0.19251
Nod2	ENSMUSG00000055994	0.40301	0.19251
Unc93b1	ENSMUSG00000036908	0.32811	0.19294
Sumo2	ENSMUSG00000020738	0.16667	0.19325
Insig1	ENSMUSG00000045294	0.2095	0.19358
Nmi	ENSMUSG00000026946	0.30675	0.1944
Dnaaf3	ENSMUSG00000055809	0.36199	0.19456
Dok5	ENSMUSG00000027560	0.25906	0.19504
Ecel1	ENSMUSG00000026247	0.36618	0.19504
Aldh1a2	ENSMUSG00000013584	0.39565	0.19525
Casz1	ENSMUSG00000028977	0.32705	0.19547
Pkdcc	ENSMUSG00000024247	0.28824	0.19585
Ppm1m	ENSMUSG00000020253	0.25144	0.19621
Ces1d	ENSMUSG00000056973	0.39942	0.19735
Slc41a3	ENSMUSG00000030089	0.28485	0.19745
Ldhd	ENSMUSG00000031958	0.22867	0.1976
Bcl6b	ENSMUSG00000000317	0.36843	0.1976
Wnt8b	ENSMUSG00000036961	0.39841	0.1976
Tcf7l1	ENSMUSG00000055799	0.26291	0.19776
B4galt3	ENSMUSG00000052423	0.22965	0.19817
Gm17750	ENSMUSG00000098087	0.32991	0.1983
Acyp1	ENSMUSG00000008822	0.2869	0.19845
Sox10	ENSMUSG00000033006	0.28831	0.19845
Efs	ENSMUSG00000022203	0.24731	0.19896
Sat2	ENSMUSG00000069835	0.21611	0.19983
Krt1	ENSMUSG00000046834	0.28746	0.20025
S100a11	ENSMUSG00000027907	0.3298	0.20069
Scg5	ENSMUSG00000023236	0.21608	0.20076
Sh3tc2	ENSMUSG00000045629	0.31856	0.20128
Atp1b3	ENSMUSG00000032412	0.15081	0.2017
Tprgl	ENSMUSG00000029030	0.17766	0.20203
Efna1	ENSMUSG00000027954	0.32172	0.20236
Pigp	ENSMUSG00000022940	0.20568	0.20292
Fsip1	ENSMUSG00000027344	0.38833	0.20336
Nap1l5	ENSMUSG00000055430	0.18996	0.20436
Zfp598	ENSMUSG00000041130	0.20363	0.20436
Pink1	ENSMUSG00000028756	0.23432	0.20436
Gm9967	ENSMUSG00000055323	0.37027	0.20436
Gm10131	ENSMUSG00000063412	0.39232	0.20436
Nfil3	ENSMUSG00000056749	0.28294	0.20527
Rftn1	ENSMUSG00000039316	0.29596	0.20626
H2afz	ENSMUSG00000037894	0.23558	0.20733
Phf2os1	ENSMUSG00000086889	0.38448	0.20744
Pola2	ENSMUSG00000024833	0.23771	0.20833
Ccdc155	ENSMUSG00000038292	0.34686	0.20847
Adamts13	ENSMUSG00000014852	0.38088	0.20885
Spire2	ENSMUSG00000010154	0.28056	0.20906
Tmem163	ENSMUSG00000026347	0.36893	0.20915
Ly6g6d	ENSMUSG00000073413	0.38681	0.20915
Zfp219	ENSMUSG00000049295	0.32041	0.20937
Ano2	ENSMUSG00000038115	0.39096	0.20937
Dlx5	ENSMUSG00000029755	0.29953	0.20966
Dlec1	ENSMUSG00000038060	0.35083	0.21001
Necap2	ENSMUSG00000028923	0.24285	0.21013
Zfp521	ENSMUSG00000024420	0.24967	0.21013
Gja1	ENSMUSG00000050953	0.21235	0.21046
Id1	ENSMUSG00000042745	0.31545	0.21046
Gap43	ENSMUSG00000047261	0.14154	0.21093
Tmem45a	ENSMUSG00000022754	0.38816	0.21095
Irf9	ENSMUSG00000002325	0.26845	0.21101
Gm8186	ENSMUSG00000049124	0.34288	0.21147
Mcee	ENSMUSG00000033429	0.25267	0.2117
Wdr66	ENSMUSG00000029442	0.2733	0.21196
Khk	ENSMUSG00000029162	0.30903	0.21222
Hbegf	ENSMUSG00000024486	0.18429	0.21225
Aldh3b1	ENSMUSG00000024885	0.30421	0.21225
Gstt1	ENSMUSG00000001663	0.31791	0.21225
Pecr	ENSMUSG00000026189	0.28699	0.21238
Ccndbp1	ENSMUSG00000023572	0.16425	0.21284
H2afy	ENSMUSG00000015937	0.13558	0.21346
Cd320	ENSMUSG00000002308	0.26989	0.21451
Cdh26	ENSMUSG00000039155	0.37766	0.21485
Tusc3	ENSMUSG00000039530	0.14232	0.21535
Ngdn	ENSMUSG00000022204	0.22416	0.21535
Sorbs3	ENSMUSG00000022091	0.284	0.21535
Xaf1	ENSMUSG00000040483	0.29795	0.21535
Arxes2	ENSMUSG00000048040	0.16163	0.21632
Gm13373	ENSMUSG00000087196	0.36087	0.21632
1700037C18Rik	ENSMUSG00000005983	0.28772	0.21691
Cpne2	ENSMUSG00000034361	0.31608	0.21691
P2rx4	ENSMUSG00000029470	0.19145	0.21706
Nob1	ENSMUSG00000003848	0.20264	0.21706
Cpa2	ENSMUSG00000071553	0.35221	0.21706
Sgce	ENSMUSG00000004631	0.20973	0.21809
Stmn1	ENSMUSG00000028832	0.31927	0.21809
Cda	ENSMUSG00000028755	0.36658	0.21809
Gm2885	ENSMUSG00000097103	0.38555	0.21809
Rab5c	ENSMUSG00000019173	0.21314	0.21811
Hnrnpl	ENSMUSG00000015165	0.16022	0.21817
Rcl1	ENSMUSG00000024785	0.17412	0.21817
Leprel4	ENSMUSG00000006931	0.22897	0.21817
Tspo	ENSMUSG00000041736	0.31015	0.21817
Zbtb32	ENSMUSG00000006310	0.33533	0.21817
Fam179a	ENSMUSG00000045761	0.34316	0.21817
1110038B12Rik	ENSMUSG00000092203	0.23523	0.21835
Smim18	ENSMUSG00000094500	0.29317	0.2187
Plcd3	ENSMUSG00000020937	0.27272	0.21892
Fam174a	ENSMUSG00000051185	0.19303	0.21901
Asrgl1	ENSMUSG00000024654	0.13774	0.2192
Nap1l4	ENSMUSG00000059119	0.12914	0.21936
Ect2l	ENSMUSG00000071392	0.3846	0.21977
Rcn3	ENSMUSG00000019539	0.32208	0.21994
Alpl	ENSMUSG00000028766	0.32401	0.21994
Gm11518	ENSMUSG00000081604	0.3824	0.21994
Tamm41	ENSMUSG00000030316	0.22095	0.22029
Maoa	ENSMUSG00000025037	0.24882	0.22029
Fabp5	ENSMUSG00000027533	0.25423	0.22029
Fbxo27	ENSMUSG00000037463	0.23176	0.22047
Necab2	ENSMUSG00000031837	0.31606	0.2208
Sfxn3	ENSMUSG00000025212	0.20619	0.22155
Bfsp2	ENSMUSG00000032556	0.3227	0.22172
Izumo4	ENSMUSG00000055862	0.29131	0.22214
Hyi	ENSMUSG00000006395	0.33904	0.22214
Htra2	ENSMUSG00000068329	0.21013	0.22256
D330023K18Rik	ENSMUSG00000087269	0.30771	0.22256
Lmcd1	ENSMUSG00000057604	0.31181	0.22256
Csf2rb2	ENSMUSG00000071714	0.353	0.22256
Xpnpep2	ENSMUSG00000037005	0.38022	0.22256
Pigz	ENSMUSG00000045625	0.26791	0.22262
Ctxn3	ENSMUSG00000069372	0.37683	0.22314
Zbtb42	ENSMUSG00000037638	0.35227	0.22323
Wnt11	ENSMUSG00000015957	0.35715	0.22323
Akr1c18	ENSMUSG00000021214	0.34095	0.22395
Chia1	ENSMUSG00000062778	0.34001	0.22459
Zeb2os	ENSMUSG00000052248	0.35477	0.22537
Mogs	ENSMUSG00000030036	0.25136	0.22608
Krt12	ENSMUSG00000020912	0.34711	0.22615
2700094K13Rik	ENSMUSG00000076437	0.28997	0.22629
Car3	ENSMUSG00000027559	0.37337	0.22661
Ptma	ENSMUSG00000026238	0.11062	0.22662
Pnp	ENSMUSG00000021871	0.21383	0.22662
Gucy2e	ENSMUSG00000020890	0.22663	0.22662
Ankrd39	ENSMUSG00000079610	0.2267	0.22662
2610001J05Rik	ENSMUSG00000052419	0.23269	0.22662
Zfp622	ENSMUSG00000052253	0.25917	0.22662
Fdx1	ENSMUSG00000032051	0.22923	0.22665
Vwc2	ENSMUSG00000050830	0.2775	0.22742
Snx8	ENSMUSG00000029560	0.28353	0.2277
1500035N22Rik	ENSMUSG00000059631	0.36092	0.2277
Slc15a4	ENSMUSG00000029416	0.20803	0.228
Tmem43	ENSMUSG00000030095	0.15216	0.22839
1110012L19Rik	ENSMUSG00000045237	0.2475	0.22839
Mmp15	ENSMUSG00000031790	0.20316	0.22865
Lgals9	ENSMUSG00000001123	0.29124	0.22865
Amz1	ENSMUSG00000050022	0.20559	0.22917
Neat1	ENSMUSG00000092274	0.30258	0.22925
Olig2	ENSMUSG00000039830	0.24732	0.22939
Wbp5	ENSMUSG00000042712	0.18739	0.22945
2010107G23Rik	ENSMUSG00000020083	0.21619	0.22945
Snca	ENSMUSG00000025889	0.21675	0.22945
Sox1	ENSMUSG00000096014	0.23665	0.22945
Fscn1	ENSMUSG00000029581	0.2795	0.22945
Sfrp2	ENSMUSG00000027996	0.33322	0.22945
Riiad1	ENSMUSG00000028139	0.34824	0.22945
Dapk2	ENSMUSG00000032380	0.365	0.22945
Fendrr	ENSMUSG00000097336	0.37713	0.22945
Rnd1	ENSMUSG00000054855	0.31991	0.2297
Jmjd6	ENSMUSG00000056962	0.22583	0.23022
Gm20632	ENSMUSG00000093577	0.33587	0.2304
Matn1	ENSMUSG00000040533	0.37639	0.2304
Gm9825	ENSMUSG00000096403	0.36909	0.23065
Kcnn4	ENSMUSG00000054342	0.37306	0.23065
Pusl1	ENSMUSG00000051557	0.2506	0.23067
Mybpc2	ENSMUSG00000038670	0.35425	0.23067
Pcbd2	ENSMUSG00000021496	0.32943	0.2307
Dhx58	ENSMUSG00000017830	0.34641	0.23079
Ifitm3	ENSMUSG00000025492	0.3034	0.23104
Cox6b2	ENSMUSG00000051811	0.32604	0.23104
Dusp9	ENSMUSG00000031383	0.37412	0.23172
Gm12963	ENSMUSG00000085517	0.3751	0.23172
Tifa	ENSMUSG00000046688	0.26351	0.23177
Snrpe	ENSMUSG00000090553	0.2543	0.2321
Cbr1	ENSMUSG00000051483	0.24972	0.23246
Cers2	ENSMUSG00000015714	0.14932	0.23385
9430008C03Rik	ENSMUSG00000085385	0.2549	0.23385
Hspb6	ENSMUSG00000036854	0.28564	0.23385
Trp53i13	ENSMUSG00000044328	0.33005	0.23385
Gm12966	ENSMUSG00000070729	0.37364	0.23385
Rhog	ENSMUSG00000073982	0.32242	0.23398
Gm10358	ENSMUSG00000072432	0.37333	0.23398
Zfp36	ENSMUSG00000044786	0.28137	0.23402
Mro	ENSMUSG00000064036	0.19324	0.23418
Ninj2	ENSMUSG00000041377	0.33821	0.23443
Sccpdh	ENSMUSG00000038936	0.12811	0.23469
Slc7a11	ENSMUSG00000027737	0.3397	0.23469
Armcx6	ENSMUSG00000050394	0.21689	0.23536
1810037I17Rik	ENSMUSG00000054091	0.25809	0.23574
Cmtm5	ENSMUSG00000040759	0.31449	0.23595
2810403D21Rik	ENSMUSG00000086629	0.37251	0.23608
Myh14	ENSMUSG00000030739	0.2419	0.23686
Alkbh3	ENSMUSG00000040174	0.27647	0.23717
Wbscr16	ENSMUSG00000061979	0.24134	0.23784
Pkmyt1	ENSMUSG00000023908	0.3361	0.23806
Tmem132e	ENSMUSG00000020701	0.23401	0.23821
Tsks	ENSMUSG00000059891	0.36679	0.23825
P4ha3	ENSMUSG00000051048	0.25978	0.23874
Fbrsl1	ENSMUSG00000043323	0.22876	0.23878
Smtn	ENSMUSG00000020439	0.3381	0.23878
Gm13205	ENSMUSG00000086606	0.33118	0.23912
Erh	ENSMUSG00000021131	0.201	0.24068
Apitd1	ENSMUSG00000073705	0.33531	0.24086
Gm6863	ENSMUSG00000043483	0.34409	0.24086
Spg21	ENSMUSG00000032388	0.15588	0.24233
D630023F18Rik	ENSMUSG00000044816	0.32132	0.24233
Tekt2	ENSMUSG00000028845	0.36938	0.24233
Dhrs7	ENSMUSG00000021094	0.15974	0.24267
Sdr39u1	ENSMUSG00000022223	0.22699	0.24267
Fuz	ENSMUSG00000011658	0.25573	0.24267
Tctex1d4	ENSMUSG00000047671	0.36626	0.24267
Ier5	ENSMUSG00000056708	0.29161	0.24389
Myh3	ENSMUSG00000020908	0.30004	0.24389
Gm17455	ENSMUSG00000090439	0.35702	0.24447
Tmem253	ENSMUSG00000072571	0.36741	0.24507
Meig1	ENSMUSG00000026650	0.34311	0.24632
Apln	ENSMUSG00000037010	0.1651	0.24652
Dnajc19	ENSMUSG00000027679	0.24724	0.24652
Tsfm	ENSMUSG00000040521	0.26486	0.24652
Tapbp	ENSMUSG00000024308	0.26005	0.24837
Traf5	ENSMUSG00000026637	0.34988	0.24837
Enpp6	ENSMUSG00000038173	0.30768	0.24857
1700113A16Rik	ENSMUSG00000096935	0.36156	0.24953
Gbp6	ENSMUSG00000079362	0.36322	0.24958
Rpp25l	ENSMUSG00000036114	0.31746	0.24964
Accs	ENSMUSG00000040272	0.27869	0.24976
4930481A15Rik	ENSMUSG00000086938	0.34326	0.24976
6530411M01Rik	ENSMUSG00000097049	0.36146	0.24992
H3f3b	ENSMUSG00000016559	0.17283	0.25006
D130020L05Rik	ENSMUSG00000097121	0.33429	0.25006
Cxxc5	ENSMUSG00000046668	0.14598	0.25075
Ager	ENSMUSG00000015452	0.35697	0.25095
Ppp2cb	ENSMUSG00000009630	0.13356	0.25151
Gem	ENSMUSG00000028214	0.34065	0.25151
Ssu72	ENSMUSG00000029038	0.18119	0.25278
Tmem216	ENSMUSG00000024667	0.24307	0.25297
Xylt2	ENSMUSG00000020868	0.19193	0.2536
Gm10443	ENSMUSG00000072940	0.3629	0.2536
Gm3531	ENSMUSG00000089782	0.34524	0.25426
Pygb	ENSMUSG00000033059	0.1605	0.25494
Tph2	ENSMUSG00000006764	0.30723	0.25494
Oaz1	ENSMUSG00000035242	0.29858	0.25499
Gale	ENSMUSG00000028671	0.27677	0.25586
Plekhh3	ENSMUSG00000035172	0.31205	0.25586
Pmf1	ENSMUSG00000028066	0.32348	0.25586
Slc6a12	ENSMUSG00000030109	0.35984	0.25586
Kctd14	ENSMUSG00000051727	0.24872	0.25644
Psme2	ENSMUSG00000079197	0.23443	0.25646
Ltbp1	ENSMUSG00000001870	0.23631	0.25655
Dusp26	ENSMUSG00000039661	0.26954	0.25655
Ppp1r17	ENSMUSG00000002930	0.29089	0.25655
Gm12184	ENSMUSG00000078154	0.36008	0.25655
Lrrc25	ENSMUSG00000049988	0.36101	0.25655
Gm13375	ENSMUSG00000075514	0.28833	0.25677
Fez2	ENSMUSG00000056121	0.16922	0.25828
Tob2	ENSMUSG00000048546	0.18078	0.25852
Hacl1	ENSMUSG00000021884	0.23744	0.25852
Hps1	ENSMUSG00000025188	0.2569	0.25852
Zfp414	ENSMUSG00000073423	0.26409	0.25859
Med8	ENSMUSG00000006392	0.15712	0.25999
Fam212a	ENSMUSG00000042106	0.32212	0.25999
Gstz1	ENSMUSG00000021033	0.20436	0.26091
Ctdsp1	ENSMUSG00000026176	0.18184	0.26092
Prkrip1	ENSMUSG00000039737	0.19128	0.26104
Gm4349	ENSMUSG00000097532	0.34349	0.26104
Fgd2	ENSMUSG00000024013	0.26968	0.26119
Ppard	ENSMUSG00000002250	0.21565	0.26152
Hebp1	ENSMUSG00000042770	0.21655	0.26162
Spata3	ENSMUSG00000026226	0.34216	0.26162
Map4k2	ENSMUSG00000024948	0.12439	0.26175
Dtd1	ENSMUSG00000027430	0.14991	0.26175
Dnase1l1	ENSMUSG00000019088	0.33761	0.26175
Avpi1	ENSMUSG00000018821	0.28164	0.2618
Dnaic2	ENSMUSG00000034706	0.31094	0.2618
Zmynd10	ENSMUSG00000010044	0.29171	0.26226
Arc	ENSMUSG00000022602	0.34212	0.26254
Cartpt	ENSMUSG00000021647	0.32201	0.26281
Tuba8	ENSMUSG00000030137	0.28224	0.26343
Adra1b	ENSMUSG00000050541	0.35463	0.26343
Ccdc19	ENSMUSG00000026546	0.29803	0.26445
Npas4	ENSMUSG00000045903	0.34672	0.26482
Hnrnpa0	ENSMUSG00000007836	0.22998	0.26535
Sugct	ENSMUSG00000055137	0.2703	0.26535
Dao	ENSMUSG00000042096	0.33533	0.2656
Grp	ENSMUSG00000024517	0.27961	0.26594
Lmna	ENSMUSG00000028063	0.28917	0.26594
Coro1a	ENSMUSG00000030707	0.26789	0.26624
Sun2	ENSMUSG00000042524	0.17271	0.26643
Rps27rt	ENSMUSG00000050621	0.3484	0.26643
Lst1	ENSMUSG00000073412	0.34747	0.26648
Ermard	ENSMUSG00000036552	0.22709	0.26657
Ccdc136	ENSMUSG00000029769	0.31969	0.26657
Rlbp1	ENSMUSG00000039194	0.23131	0.26738
Prr24	ENSMUSG00000091811	0.32988	0.26738
Midn	ENSMUSG00000035621	0.23463	0.26781
Cubn	ENSMUSG00000026726	0.3305	0.2688
Atp2a3	ENSMUSG00000020788	0.2229	0.26895
Erbb2	ENSMUSG00000062312	0.23455	0.26908
Lrrc71	ENSMUSG00000023084	0.35172	0.2693
Rassf3	ENSMUSG00000025795	0.30227	0.26971
2510039O18Rik	ENSMUSG00000044496	0.24873	0.26991
Rpl22	ENSMUSG00000028936	0.18527	0.27002
Pls1	ENSMUSG00000049493	0.21779	0.27002
Pfdn2	ENSMUSG00000006412	0.246	0.27002
Rdm1	ENSMUSG00000010362	0.28507	0.27002
Phgdh	ENSMUSG00000053398	0.2872	0.27002
Fam101b	ENSMUSG00000020846	0.287	0.27012
Fam132a	ENSMUSG00000023571	0.29927	0.27012
Toe1	ENSMUSG00000028688	0.20727	0.27014
Serpine2	ENSMUSG00000026249	0.16473	0.2703
9030407P20Rik	ENSMUSG00000097343	0.22436	0.27112
Llph-ps2	ENSMUSG00000083364	0.35209	0.27116
Igha	ENSMUSG00000095079	0.26721	0.27166
Lage3	ENSMUSG00000015289	0.23426	0.27192
Smyd3	ENSMUSG00000055067	0.14407	0.27274
9330162012Rik	ENSMUSG00000086448	0.26522	0.27274
Mrps28	ENSMUSG00000040269	0.25925	0.27337
Fbxo17	ENSMUSG00000030598	0.2723	0.27337
Dnpep	ENSMUSG00000026209	0.23436	0.27351
Pla2g2d	ENSMUSG00000041202	0.34582	0.27381
Opn3	ENSMUSG00000026525	0.3456	0.27426
Plekhg3	ENSMUSG00000052609	0.18068	0.27447
0610011F06Rik	ENSMUSG00000025731	0.26023	0.27447
Gng8	ENSMUSG00000063594	0.29531	0.27447
AI848285	ENSMUSG00000096883	0.34981	0.27447
Usp30	ENSMUSG00000029592	0.16965	0.27483
Fdft1	ENSMUSG00000021273	0.20163	0.27483
N4bp3	ENSMUSG00000001053	0.27475	0.27483
Nradd	ENSMUSG00000032491	0.33674	0.27483
Gtl3	ENSMUSG00000031796	0.17928	0.27508
Ngp	ENSMUSG00000032484	0.27995	0.27602
Tsen54	ENSMUSG00000020781	0.28672	0.27602
Cdkn1a	ENSMUSG00000023067	0.30736	0.27602
Batf3	ENSMUSG00000026630	0.34826	0.27602
Mbd2	ENSMUSG00000024513	0.15445	0.27626
Ift20	ENSMUSG00000001105	0.1748	0.27626
Ccdc64	ENSMUSG00000041609	0.181	0.27626
Klf15	ENSMUSG00000030087	0.19542	0.27626
Nagk	ENSMUSG00000034744	0.22758	0.27626
Kcnh3	ENSMUSG00000037579	0.32184	0.27626
Gm15590	ENSMUSG00000058542	0.3273	0.27626
Polr3gl	ENSMUSG00000028104	0.15927	0.27672
Rps12-ps3	ENSMUSG00000067038	0.34697	0.27672
Gm4221	ENSMUSG00000096948	0.34848	0.27672
Aifm2	ENSMUSG00000020085	0.20244	0.278
Ngfr	ENSMUSG00000000120	0.25777	0.27826
Car9	ENSMUSG00000028463	0.34511	0.27826
Nanos3	ENSMUSG00000056155	0.3479	0.27826
Oard1	ENSMUSG00000040771	0.19981	0.27834
Gm12191	ENSMUSG00000083061	0.32533	0.27834
Tmem184b	ENSMUSG00000009035	0.15343	0.28002
Rabep2	ENSMUSG00000030727	0.19967	0.28065
Gm6548	ENSMUSG00000091549	0.26037	0.28065
Gm7467	ENSMUSG00000098449	0.32468	0.28065
Szrd1	ENSMUSG00000040842	0.16602	0.28111
Hebp2	ENSMUSG00000019853	0.28157	0.28111
Vamp5	ENSMUSG00000073002	0.31324	0.28157
Nudt2	ENSMUSG00000028443	0.18232	0.28167
Fam20c	ENSMUSG00000025854	0.24712	0.28167
Plxnd1	ENSMUSG00000030123	0.26746	0.28302
Pus7l	ENSMUSG00000033356	0.27742	0.28307
Relt	ENSMUSG00000008318	0.23614	0.28336
Vax1	ENSMUSG00000006270	0.31777	0.28354
Itga3	ENSMUSG00000001507	0.22837	0.28366
Pvr	ENSMUSG00000040511	0.20091	0.28411
Rab33a	ENSMUSG00000031104	0.21158	0.28411
Daw1	ENSMUSG00000053161	0.33824	0.28485
Cdk2ap1	ENSMUSG00000029394	0.29631	0.28519
Daxx	ENSMUSG00000002307	0.17781	0.28521
Gm11223	ENSMUSG00000046341	0.3308	0.28548
Ak2	ENSMUSG00000028792	0.22122	0.28555
Sgk2	ENSMUSG00000017868	0.27584	0.2859
Lsm7	ENSMUSG00000035215	0.28095	0.28606
Slc35b2	ENSMUSG00000037089	0.23447	0.28611
Nrg1	ENSMUSG00000062991	0.32201	0.28694
Echs1	ENSMUSG00000025465	0.15315	0.28742
Hmgn1	ENSMUSG00000040681	0.16245	0.28742
Nphp3	ENSMUSG00000032558	0.29204	0.28742
Lmo1	ENSMUSG00000036111	0.30326	0.28742
Mfsd10	ENSMUSG00000001082	0.25681	0.28788
BC035947	ENSMUSG00000090486	0.34086	0.28788
Oaz1-ps	ENSMUSG00000043801	0.33662	0.2879
Isca2	ENSMUSG00000021241	0.1835	0.28901
Maff	ENSMUSG00000042622	0.32209	0.28917
Kcnh2	ENSMUSG00000038319	0.27297	0.28987
Tmem11	ENSMUSG00000043284	0.21059	0.29024
Map3k14	ENSMUSG00000020941	0.23407	0.29024
Mrpl23	ENSMUSG00000037772	0.2809	0.29024
G6pc3	ENSMUSG00000034793	0.26861	0.29031
Jun	ENSMUSG00000052684	0.19256	0.29033
Prmt1	ENSMUSG00000052429	0.22066	0.29033
Gsto2	ENSMUSG00000025069	0.3094	0.29033
S100a8	ENSMUSG00000056054	0.33758	0.29033
Tmem9	ENSMUSG00000026411	0.22328	0.29103
Malsu1	ENSMUSG00000029815	0.21855	0.29115
Nol3	ENSMUSG00000014776	0.28988	0.29123
Nrsn2	ENSMUSG00000059361	0.2751	0.29139
E030019B06Rik	ENSMUSG00000070357	0.34032	0.29141
Gnb4	ENSMUSG00000027669	0.17595	0.29155
Gm2830	ENSMUSG00000086567	0.31505	0.29183
Fbxw10	ENSMUSG00000090173	0.34013	0.29183
Tnfaip2	ENSMUSG00000021281	0.27085	0.29191
Sdc1	ENSMUSG00000020592	0.31336	0.29249
Ppap2b	ENSMUSG00000028517	0.21049	0.29266
Rab43	ENSMUSG00000030055	0.14301	0.29289
Galk2	ENSMUSG00000027207	0.16814	0.29289
Eif2b3	ENSMUSG00000028683	0.19481	0.29289
Ppp1r3g	ENSMUSG00000050423	0.29366	0.29289
Gm5617	ENSMUSG00000042293	0.31958	0.29368
Cgref1	ENSMUSG00000029161	0.22171	0.29503
Lzts2	ENSMUSG00000035342	0.27857	0.29503
Echdc3	ENSMUSG00000039063	0.33546	0.29503
Tap2	ENSMUSG00000024339	0.25997	0.29551
Gm10481	ENSMUSG00000096810	0.33413	0.29606
Klf2	ENSMUSG00000055148	0.33832	0.29606
Dnajb5	ENSMUSG00000036052	0.21228	0.29622
Camk1	ENSMUSG00000030272	0.2098	0.29624
Prnp	ENSMUSG00000079037	0.098524	0.29661
Ppp1r14b	ENSMUSG00000056612	0.27113	0.29661
Rnf217	ENSMUSG00000063760	0.26293	0.29672
Rit1	ENSMUSG00000028057	0.17466	0.29763
Kcnj9	ENSMUSG00000038026	0.17916	0.29824
Dtx3	ENSMUSG00000040415	0.24704	0.29909
Fbl	ENSMUSG00000046865	0.24185	0.29958
Hmga1	ENSMUSG00000046711	0.24346	0.29958
Camk2n2	ENSMUSG00000051146	0.32437	0.29958
Dio3	ENSMUSG00000075707	0.33364	0.29958
Wdr65	ENSMUSG00000028730	0.33504	0.29958
Gchfr	ENSMUSG00000046814	0.33625	0.29958
Erich2	ENSMUSG00000075302	0.3364	0.29958
Rac2	ENSMUSG00000033220	0.30582	0.29996
Ripply2	ENSMUSG00000047897	0.24085	0.30048
BC030867	ENSMUSG00000034773	0.31921	0.30048
Fosl2	ENSMUSG00000029135	0.24097	0.30111
Sh3bp2	ENSMUSG00000054520	0.21718	0.30118
S100a4	ENSMUSG00000001020	0.31281	0.30127
Sf3b6	ENSMUSG00000037361	0.17722	0.30207
Fam154b	ENSMUSG00000038570	0.2532	0.30207
Cxcl16	ENSMUSG00000018920	0.30873	0.30207
Cldn10	ENSMUSG00000022132	0.23033	0.30217
Necab3	ENSMUSG00000027489	0.30859	0.30218
Ttc16	ENSMUSG00000039021	0.33434	0.30218
2810001G20Rik	ENSMUSG00000087497	0.22708	0.30219
Zfp787	ENSMUSG00000046792	0.25064	0.3028
Ppp2r3d	ENSMUSG00000093803	0.29457	0.30287
Tpd52	ENSMUSG00000027506	0.12398	0.30394
Aph1a	ENSMUSG00000015750	0.14346	0.30394
Pde6g	ENSMUSG00000025386	0.23424	0.30394
Med11	ENSMUSG00000018923	0.21714	0.30403
Fxyd1	ENSMUSG00000036570	0.30501	0.30413
Fbxw9	ENSMUSG00000008167	0.25774	0.3054
Vwa3a	ENSMUSG00000030889	0.24806	0.30569
Gm17276	ENSMUSG00000097305	0.33339	0.30569
Npm3	ENSMUSG00000056209	0.26231	0.30601
Eya2	ENSMUSG00000017897	0.28001	0.30601
Mlf1	ENSMUSG00000048416	0.33322	0.30604
Nudt14	ENSMUSG00000002804	0.27138	0.30617
Sbds	ENSMUSG00000025337	0.12139	0.30678
Ypel3	ENSMUSG00000042675	0.24585	0.30713
Spa17	ENSMUSG00000001948	0.24793	0.30713
Slc22a4	ENSMUSG00000020334	0.2682	0.30713
Gm16365	ENSMUSG00000086915	0.33235	0.30713
1810062O18Rik	ENSMUSG00000084925	0.32257	0.30724
Snhg12	ENSMUSG00000086290	0.25894	0.30728
2610524H06Rik	ENSMUSG00000092486	0.24308	0.30736
Phf1	ENSMUSG00000024193	0.26833	0.30769
Gstm4	ENSMUSG00000027890	0.22574	0.30794
Kiz	ENSMUSG00000074749	0.14812	0.30856
Rsph1	ENSMUSG00000024033	0.3068	0.30875
Tmem150a	ENSMUSG00000055912	0.23569	0.30893
Mcl1	ENSMUSG00000038612	0.11311	0.30899
Dcaf4	ENSMUSG00000021222	0.16121	0.30899
Nop10	ENSMUSG00000027133	0.22736	0.30899
Rpl30	ENSMUSG00000058600	0.23888	0.30899
Tmem258	ENSMUSG00000036372	0.23957	0.30899
Flot1	ENSMUSG00000059714	0.25472	0.30899
H2-DMb1	ENSMUSG00000079547	0.29476	0.30899
Hes7	ENSMUSG00000023781	0.3268	0.30899
Flywch2	ENSMUSG00000023911	0.28444	0.30903
2410002F23Rik	ENSMUSG00000045411	0.15665	0.30984
Plcd1	ENSMUSG00000010660	0.21009	0.31067
Lrrc23	ENSMUSG00000030125	0.31675	0.31067
Sirt3	ENSMUSG00000025486	0.22879	0.31076
Ier5l	ENSMUSG00000089762	0.326	0.31076
Ifi203	ENSMUSG00000039997	0.30541	0.31108
Dlx6	ENSMUSG00000029754	0.27528	0.31189
S100a13	ENSMUSG00000042312	0.28101	0.31195
Hmgcl	ENSMUSG00000028672	0.15568	0.3121
Plekhj1	ENSMUSG00000035278	0.23003	0.3121
Slc15a3	ENSMUSG00000024737	0.24297	0.3121
Map3k8	ENSMUSG00000024235	0.32194	0.3121
Trim26	ENSMUSG00000024457	0.13249	0.31266
Prkab1	ENSMUSG00000029513	0.18886	0.31266
Thnsl2	ENSMUSG00000054474	0.25317	0.31266
Dbx2	ENSMUSG00000045608	0.26755	0.31266
Sh2d6	ENSMUSG00000052631	0.32869	0.31266
Prdx4	ENSMUSG00000025289	0.19173	0.31341
Dynlrb2	ENSMUSG00000034467	0.3271	0.31381
Egflam	ENSMUSG00000042961	0.26646	0.31404
Fam181a	ENSMUSG00000096753	0.31311	0.31404
H2-T10	ENSMUSG00000079491	0.32661	0.31404
Lhpp	ENSMUSG00000030946	0.24516	0.31454
Acadm	ENSMUSG00000062908	0.14458	0.31456
Cbx8	ENSMUSG00000025578	0.1945	0.31456
Tfap4	ENSMUSG00000005718	0.25396	0.31456
Nmnat3	ENSMUSG00000032456	0.26858	0.31456
Rorc	ENSMUSG00000028150	0.27353	0.31541
Gm15487	ENSMUSG00000080242	0.30853	0.31541
Wrnip1	ENSMUSG00000021400	0.14305	0.31617
Slc35d1	ENSMUSG00000028521	0.17414	0.31617
Tulp1	ENSMUSG00000037446	0.177	0.31617
Rcn1	ENSMUSG00000005973	0.18421	0.31617
Popdc3	ENSMUSG00000019848	0.19579	0.31617
2310015A10Rik	ENSMUSG00000097729	0.1967	0.31617
Cdr2	ENSMUSG00000030878	0.2303	0.31617
Gm2415	ENSMUSG00000086119	0.23032	0.31617
Itfg3	ENSMUSG00000024187	0.25304	0.31617
Gm973	ENSMUSG00000047361	0.25341	0.31617
Dll1	ENSMUSG00000014773	0.25363	0.31617
Rnd2	ENSMUSG00000001313	0.26961	0.31617
Renbp	ENSMUSG00000031387	0.27597	0.31617
H2-Eb1	ENSMUSG00000060586	0.31284	0.31617
Gm16702	ENSMUSG00000097796	0.31982	0.31617
Gm10327	ENSMUSG00000071343	0.32254	0.31617
1190005I06Rik	ENSMUSG00000043687	0.32308	0.31617
Lhx5	ENSMUSG00000029595	0.31245	0.31644
Fam222a	ENSMUSG00000041930	0.22897	0.31781
Exd1	ENSMUSG00000048647	0.31149	0.31781
Abhd16a	ENSMUSG00000007036	0.21609	0.31806
Fhdc1	ENSMUSG00000041842	0.28642	0.31839
Tuba1c	ENSMUSG00000043091	0.31567	0.31862
Eno1b	ENSMUSG00000059040	0.27365	0.31877
Tcta	ENSMUSG00000039461	0.18137	0.31905
Tmod3	ENSMUSG00000058587	0.13484	0.31924
Rtca	ENSMUSG00000000339	0.15076	0.31929
Syngr2	ENSMUSG00000048277	0.24674	0.31948
Aen	ENSMUSG00000030609	0.14859	0.31984
Crym	ENSMUSG00000030905	0.22829	0.32062
4930506M07Rik	ENSMUSG00000041362	0.21604	0.32082
Eno3	ENSMUSG00000060600	0.30947	0.32082
Styk1	ENSMUSG00000032899	0.32418	0.32104
Arf6	ENSMUSG00000044147	0.18215	0.32146
Dnajb1	ENSMUSG00000005483	0.21489	0.32231
Rsph9	ENSMUSG00000023966	0.251	0.32258
1110001J03Rik	ENSMUSG00000019689	0.26274	0.32258
Wdr31	ENSMUSG00000028391	0.2171	0.32291
Dhrs11	ENSMUSG00000034449	0.23919	0.32291
Alkbh6	ENSMUSG00000042831	0.26624	0.32302
Arl2bp	ENSMUSG00000031776	0.12256	0.32348
Atp6v1c2	ENSMUSG00000020566	0.31247	0.32351
AU020206	ENSMUSG00000097415	0.31953	0.32351
Cnn1	ENSMUSG00000001349	0.31006	0.32416
Hdac11	ENSMUSG00000034245	0.21151	0.32454
Cdkn2d	ENSMUSG00000096472	0.23078	0.32454
Olfm2	ENSMUSG00000032172	0.25852	0.32454
Gm4491	ENSMUSG00000089840	0.31877	0.32454
Dfna5	ENSMUSG00000029821	0.17615	0.32474
Pthlh	ENSMUSG00000048776	0.27027	0.32474
Cebpb	ENSMUSG00000056501	0.31687	0.32474
Snrnp40	ENSMUSG00000074088	0.1642	0.32478
Mndal	ENSMUSG00000090272	0.26776	0.32481
Itk	ENSMUSG00000020395	0.32002	0.32481
Mapkapk5	ENSMUSG00000029454	0.1621	0.32486
Tmbim4	ENSMUSG00000020225	0.1814	0.32486
Stmn4	ENSMUSG00000022044	0.19379	0.32486
Zfand2b	ENSMUSG00000026197	0.26843	0.32486
Cd63-ps	ENSMUSG00000085939	0.29219	0.32486
Cmtm7	ENSMUSG00000032436	0.30215	0.32486
B230206H07Rik	ENSMUSG00000086844	0.32142	0.32486
Ryk	ENSMUSG00000032547	0.11426	0.32532
2700046G09Rik	ENSMUSG00000097787	0.26755	0.32532
Nos3	ENSMUSG00000028978	0.29082	0.32542
Lrrc36	ENSMUSG00000054320	0.31662	0.32542
Gm13736	ENSMUSG00000082908	0.31949	0.32542
Deaf1	ENSMUSG00000058886	0.22095	0.3257
Sumf2	ENSMUSG00000025538	0.19807	0.32609
Tceal6	ENSMUSG00000031409	0.2006	0.32609
Copz2	ENSMUSG00000018672	0.23578	0.32609
Capsl	ENSMUSG00000039676	0.27928	0.32609
Gm1821	ENSMUSG00000044285	0.18864	0.32627
Akr1b3	ENSMUSG00000001642	0.21745	0.32627
Exosc7	ENSMUSG00000025785	0.19721	0.32642
Ccdc74a	ENSMUSG00000041617	0.24269	0.32672
2810410L24Rik	ENSMUSG00000075389	0.27988	0.32808
RP23-117O11.4	ENSMUSG00000099632	0.29974	0.32841
Iah1	ENSMUSG00000062054	0.17875	0.32855
Commd4	ENSMUSG00000032299	0.21958	0.32929
Nsg1	ENSMUSG00000029126	0.11509	0.32949
C2cd2l	ENSMUSG00000032120	0.19084	0.32954
Zswim4	ENSMUSG00000035671	0.18784	0.32968
Ppie	ENSMUSG00000028651	0.22403	0.32968
Cenpa	ENSMUSG00000029177	0.28914	0.32968
Rec8	ENSMUSG00000002324	0.29734	0.32968
Tiparp	ENSMUSG00000034640	0.24752	0.32974
Kctd15	ENSMUSG00000030499	0.19487	0.32978
Frat2	ENSMUSG00000047604	0.26098	0.32981
Lrrc51	ENSMUSG00000064307	0.2322	0.32989
Glra2	ENSMUSG00000018589	0.26937	0.32989
Mex3d	ENSMUSG00000048696	0.2153	0.32996
Cd83	ENSMUSG00000015396	0.18253	0.33018
Phf23	ENSMUSG00000018572	0.18383	0.33021
Cpsf4	ENSMUSG00000029625	0.20503	0.33021
Abhd14b	ENSMUSG00000042073	0.22692	0.33021
Ugt8a	ENSMUSG00000032854	0.23161	0.33021
Mvp	ENSMUSG00000030681	0.25944	0.33021
Gm26703	ENSMUSG00000097877	0.30934	0.33021
Krt15	ENSMUSG00000054146	0.31882	0.3304
Atp6v1f	ENSMUSG00000004285	0.24881	0.3307
Emc6	ENSMUSG00000047260	0.1763	0.33071
Trabd	ENSMUSG00000015363	0.20088	0.33071
Sncb	ENSMUSG00000034891	0.2529	0.33071
Gm13493	ENSMUSG00000087701	0.31687	0.33071
Th	ENSMUSG00000000214	0.31451	0.33108
Srsf5	ENSMUSG00000021134	0.23723	0.33122
Mad2l2	ENSMUSG00000029003	0.23917	0.33149
Gm11517	ENSMUSG00000081249	0.31681	0.33149
Grm4	ENSMUSG00000063239	0.29563	0.33192
Fhl3	ENSMUSG00000032643	0.29961	0.33207
Hscb	ENSMUSG00000043510	0.21416	0.33217
Col26a1	ENSMUSG00000004415	0.23589	0.33217
Lhfpl1	ENSMUSG00000041700	0.28457	0.33234
Srf	ENSMUSG00000015605	0.183	0.33271
9630001P10Rik	ENSMUSG00000097825	0.31582	0.33298
Pold4	ENSMUSG00000024854	0.24051	0.333
Bcl2l12	ENSMUSG00000003190	0.31277	0.333
Pdrg1	ENSMUSG00000027472	0.21793	0.33383
Fam181b	ENSMUSG00000051515	0.22951	0.33422
Ngfrap1	ENSMUSG00000046432	0.24529	0.33422
Slc6a11	ENSMUSG00000030307	0.24551	0.33454
Phlda3	ENSMUSG00000041801	0.26419	0.33454
Nsmce1	ENSMUSG00000030750	0.24864	0.33461
Itpa	ENSMUSG00000074797	0.13887	0.33509
Sec11a	ENSMUSG00000025724	0.13952	0.33509
Zfp956	ENSMUSG00000045466	0.15722	0.33509
Tmem173	ENSMUSG00000024349	0.24029	0.33509
Polr2h	ENSMUSG00000021018	0.24636	0.33509
Trim7	ENSMUSG00000040350	0.29585	0.33509
Rnf114	ENSMUSG00000006418	0.096342	0.33556
Bbox1	ENSMUSG00000041660	0.29789	0.33631
Idh1	ENSMUSG00000025950	0.17759	0.33637
Rpl11	ENSMUSG00000059291	0.23516	0.33637
Mettl22	ENSMUSG00000039345	0.25803	0.33637
Rgma	ENSMUSG00000070509	0.14456	0.33663
Lgals3	ENSMUSG00000050335	0.30124	0.33663
9630028B13Rik	ENSMUSG00000051295	0.31539	0.33663
Cyb5r3	ENSMUSG00000018042	0.20789	0.3367
Hbb-bs	ENSMUSG00000052305	0.25557	0.3367
Stoml3	ENSMUSG00000027744	0.31409	0.3367
Gm12537	ENSMUSG00000095042	0.31433	0.3367
Triobp	ENSMUSG00000033088	0.16224	0.337
Coprs	ENSMUSG00000031458	0.22393	0.33731
Rarres1	ENSMUSG00000049404	0.25039	0.33731
Fah	ENSMUSG00000030630	0.26384	0.33743
Nkx2-9	ENSMUSG00000058669	0.29682	0.33743
Obsl1	ENSMUSG00000026211	0.14979	0.33744
Rbbp4	ENSMUSG00000057236	0.13469	0.33758
Fbxo36	ENSMUSG00000073633	0.27555	0.33758
Mpzl1	ENSMUSG00000026566	0.15199	0.33785
Gata2	ENSMUSG00000015053	0.21695	0.33812
Txn1	ENSMUSG00000028367	0.20162	0.33817
Tmem88b	ENSMUSG00000073680	0.21189	0.33817
Rps3a3	ENSMUSG00000059751	0.30833	0.33817
Fads2	ENSMUSG00000024665	0.13562	0.33887
1700007L15Rik	ENSMUSG00000097318	0.31399	0.33935
Commd7	ENSMUSG00000056941	0.16457	0.33938
Pdcl3	ENSMUSG00000026078	0.13866	0.33962
Triap1	ENSMUSG00000029535	0.18086	0.34018
Tma7	ENSMUSG00000091537	0.19562	0.34018
Klc4	ENSMUSG00000003546	0.20779	0.34018
Ppp1r18	ENSMUSG00000034595	0.21976	0.34018
Slco4a1	ENSMUSG00000038963	0.27668	0.34018
Morn5	ENSMUSG00000026894	0.29359	0.34039
Arpp21	ENSMUSG00000032503	0.18996	0.34073
Ano10	ENSMUSG00000037949	0.18625	0.34108
Alkbh4	ENSMUSG00000039754	0.21016	0.34108
Snhg7	ENSMUSG00000097052	0.24083	0.34108
Tkt	ENSMUSG00000021957	0.22202	0.34123
Smyd2	ENSMUSG00000026603	0.22796	0.34153
Rcc1	ENSMUSG00000028896	0.17256	0.34175
S100a1	ENSMUSG00000044080	0.25638	0.34175
Atg9b	ENSMUSG00000038295	0.20953	0.34177
Limk2	ENSMUSG00000020451	0.095625	0.34206
Sncaip	ENSMUSG00000024534	0.2299	0.34209
Scrib	ENSMUSG00000022568	0.14949	0.34344
Id2	ENSMUSG00000020644	0.19244	0.34369
Obfc1	ENSMUSG00000042694	0.20175	0.34369
Mab21l2	ENSMUSG00000057777	0.23166	0.34369
1110017D15Rik	ENSMUSG00000028441	0.28502	0.34369
Kctd8	ENSMUSG00000037653	0.28622	0.34369
H2-Q6	ENSMUSG00000073409	0.30945	0.34369
Rtdr1	ENSMUSG00000009070	0.30199	0.34377
Cd24a	ENSMUSG00000047139	0.26129	0.34416
4932443I19Rik	ENSMUSG00000090336	0.31109	0.34416
Gm15417	ENSMUSG00000074466	0.26654	0.34485
Romo1	ENSMUSG00000067847	0.27186	0.34485
Capg	ENSMUSG00000056737	0.27561	0.34485
Car8	ENSMUSG00000041261	0.30903	0.34485
Pea15a	ENSMUSG00000013698	0.14832	0.34505
Rbbp6	ENSMUSG00000030779	0.11165	0.34576
Garnl3	ENSMUSG00000038860	0.14908	0.34576
H2-T23	ENSMUSG00000067212	0.16691	0.34576
Pde6d	ENSMUSG00000026239	0.18012	0.34576
Pisd	ENSMUSG00000023452	0.2063	0.34576
Trp53rk	ENSMUSG00000042854	0.21183	0.34576
Sp9	ENSMUSG00000068859	0.2524	0.34576
H2-Q2	ENSMUSG00000091705	0.2674	0.34576
Tmie	ENSMUSG00000049555	0.28329	0.34576
Gm10775	ENSMUSG00000074847	0.30707	0.34576
Pla2g7	ENSMUSG00000023913	0.16574	0.34639
Cacng7	ENSMUSG00000069806	0.10011	0.34655
Cdhr1	ENSMUSG00000021803	0.2394	0.34655
Trafd1	ENSMUSG00000042726	0.14557	0.34708
Shisa4	ENSMUSG00000041889	0.24535	0.34732
Lzts3	ENSMUSG00000037703	0.15171	0.34756
Mllt6	ENSMUSG00000038437	0.14725	0.34774
Plcb3	ENSMUSG00000024960	0.14385	0.34788
Btf3	ENSMUSG00000021660	0.16686	0.34788
Blvrb	ENSMUSG00000040466	0.27102	0.34796
Col6a6	ENSMUSG00000043719	0.30547	0.34796
Bri3	ENSMUSG00000047843	0.27227	0.34889
Tmem198	ENSMUSG00000051703	0.28035	0.34889
Gm4294	ENSMUSG00000078377	0.30752	0.34889
Spag7	ENSMUSG00000018287	0.19037	0.34941
Adprhl2	ENSMUSG00000042558	0.2367	0.35037
Cnnm4	ENSMUSG00000037408	0.18536	0.35061
Fhl1	ENSMUSG00000023092	0.17159	0.35069
Slc35g2	ENSMUSG00000070287	0.15304	0.35097
Ctbp1	ENSMUSG00000037373	0.16033	0.35097
Wfdc18	ENSMUSG00000000983	0.30759	0.35097
Pld6	ENSMUSG00000043648	0.30243	0.35107
H2-DMa	ENSMUSG00000037649	0.25272	0.35144
Casc1	ENSMUSG00000043541	0.29516	0.35176
Gpr150	ENSMUSG00000045509	0.30046	0.35176
Cited2	ENSMUSG00000039910	0.14891	0.35201
Agbl3	ENSMUSG00000038836	0.1965	0.35201
Pip5kl1	ENSMUSG00000046854	0.27805	0.35201
Fam167b	ENSMUSG00000050493	0.30391	0.35201
Kdelr2	ENSMUSG00000079111	0.15128	0.35217
Gm715	ENSMUSG00000082226	0.26283	0.35227
Gtf2h3	ENSMUSG00000029387	0.15065	0.35233
R3hdm4	ENSMUSG00000035781	0.17732	0.35233
Scara3	ENSMUSG00000034463	0.19163	0.35233
Mettl15	ENSMUSG00000057234	0.2328	0.35261
Tlr2	ENSMUSG00000027995	0.30314	0.35365
Adamtsl2	ENSMUSG00000036040	0.20518	0.35368
A230065H16Rik	ENSMUSG00000087075	0.24579	0.35368
Rbm8a	ENSMUSG00000038374	0.12225	0.3543
Dok4	ENSMUSG00000040631	0.13525	0.3543
Rnmtl1	ENSMUSG00000038046	0.18225	0.3543
Slc1a6	ENSMUSG00000005357	0.23138	0.3543
Rasgef1b	ENSMUSG00000029333	0.29944	0.3543
Mrm1	ENSMUSG00000018405	0.19452	0.35446
Cryl1	ENSMUSG00000021947	0.20625	0.35446
Tmem175	ENSMUSG00000013495	0.12838	0.35464
Slc6a9	ENSMUSG00000028542	0.18942	0.35466
Tmed1	ENSMUSG00000032180	0.19423	0.3547
Snx20	ENSMUSG00000031662	0.2994	0.35498
Arhgap25	ENSMUSG00000030047	0.26931	0.35501
Gstp1	ENSMUSG00000060803	0.27047	0.35501
Vps37d	ENSMUSG00000043614	0.27672	0.35501
Fam104a	ENSMUSG00000041629	0.17782	0.35582
Cdk4	ENSMUSG00000006728	0.18096	0.35582
Igkc	ENSMUSG00000076609	0.26968	0.3559
Dusp28	ENSMUSG00000047067	0.22284	0.35642
Sag	ENSMUSG00000056055	0.30194	0.35642
Tpsb2	ENSMUSG00000033825	0.238	0.35755
Kxd1	ENSMUSG00000055553	0.20772	0.35762
Ldb1	ENSMUSG00000025223	0.19994	0.35858
Fbxo46	ENSMUSG00000050428	0.20488	0.35877
Rita1	ENSMUSG00000029600	0.22656	0.35877
Hs3st5	ENSMUSG00000044499	0.29498	0.35878
Cul7	ENSMUSG00000038545	0.12878	0.35952
Tspan17	ENSMUSG00000025875	0.25978	0.35952
Cbln1	ENSMUSG00000031654	0.30182	0.35953
Gm11808	ENSMUSG00000068240	0.29767	0.36009
Entpd2	ENSMUSG00000015085	0.23948	0.36011
0610007P14Rik	ENSMUSG00000021252	0.13699	0.36025
Cdv3	ENSMUSG00000032803	0.1053	0.36072
Gpr27	ENSMUSG00000072875	0.26088	0.36171
Rps27a-ps2	ENSMUSG00000058838	0.30152	0.36171
Magoh	ENSMUSG00000028609	0.19095	0.36194
Parl	ENSMUSG00000033918	0.20189	0.36214
Shfm1	ENSMUSG00000042541	0.22478	0.36214
Gna15	ENSMUSG00000034792	0.24979	0.36214
Vsig8	ENSMUSG00000049598	0.30156	0.36214
2900089D17Rik	ENSMUSG00000087484	0.29409	0.36218
Zdhhc4	ENSMUSG00000001844	0.21266	0.3626
Hnrnpf	ENSMUSG00000042079	0.10767	0.36266
Sec11c	ENSMUSG00000024516	0.1824	0.36266
Arl8a	ENSMUSG00000026426	0.18353	0.36266
Ascc1	ENSMUSG00000044475	0.22546	0.36266
Mesdc1	ENSMUSG00000070462	0.23725	0.36266
Pld4	ENSMUSG00000052160	0.27742	0.36266
Gprc5b	ENSMUSG00000008734	0.16833	0.36276
2310047M10Rik	ENSMUSG00000045176	0.24327	0.36276
Id3	ENSMUSG00000007872	0.19888	0.36309
Ntng2	ENSMUSG00000035513	0.24861	0.36309
Angel1	ENSMUSG00000021257	0.18395	0.36333
Cd74	ENSMUSG00000024610	0.30052	0.3635
Npepl1	ENSMUSG00000039263	0.23499	0.36353
Prr16	ENSMUSG00000073565	0.28468	0.36378
Sox8	ENSMUSG00000024176	0.13367	0.36393
Galk1	ENSMUSG00000020766	0.26462	0.36393
Dpm3	ENSMUSG00000042737	0.24494	0.36413
Cib2	ENSMUSG00000037493	0.16589	0.36415
Pycrl	ENSMUSG00000022571	0.22239	0.36415
Rrad	ENSMUSG00000031880	0.27744	0.36415
Armc3	ENSMUSG00000037683	0.29523	0.36415
Tcp11	ENSMUSG00000062859	0.28855	0.36433
Ap1s1	ENSMUSG00000004849	0.21862	0.36446
Gar1	ENSMUSG00000028010	0.1819	0.36454
Frs3	ENSMUSG00000023266	0.27483	0.36464
Mrpl9	ENSMUSG00000028140	0.12561	0.36481
Bag3	ENSMUSG00000030847	0.20139	0.36481
Bloc1s4	ENSMUSG00000060708	0.22016	0.36481
Chst7	ENSMUSG00000037347	0.23709	0.36481
Sdsl	ENSMUSG00000029596	0.27222	0.36481
Agpat9	ENSMUSG00000029314	0.27639	0.36481
6430503K07Rik	ENSMUSG00000053545	0.29557	0.36481
Rpl34	ENSMUSG00000062006	0.20428	0.36533
Macrod1	ENSMUSG00000036278	0.27649	0.36578
Pifo	ENSMUSG00000010136	0.2985	0.36606
Aifm3	ENSMUSG00000022763	0.21289	0.36641
Fcer1g	ENSMUSG00000058715	0.25644	0.36641
2010001A14Rik	ENSMUSG00000087165	0.23389	0.36743
Shd	ENSMUSG00000039154	0.24269	0.36743
Pvrl1	ENSMUSG00000032012	0.14493	0.36777
Anp32b	ENSMUSG00000028333	0.16579	0.36777
Lmbr1l	ENSMUSG00000022999	0.19852	0.36777
Fchsd1	ENSMUSG00000038524	0.19561	0.36792
Morn1	ENSMUSG00000029049	0.23462	0.36792
Rxrg	ENSMUSG00000015843	0.25166	0.36792
Cd300a	ENSMUSG00000034652	0.26108	0.36792
Rpl36a-ps3	ENSMUSG00000071141	0.29598	0.36822
Mpc2	ENSMUSG00000026568	0.19269	0.36833
Ccdc114	ENSMUSG00000040189	0.23866	0.36868
Gm7361	ENSMUSG00000059645	0.29204	0.36868
Asf1b	ENSMUSG00000005470	0.29631	0.36868
Gm6467	ENSMUSG00000091580	0.29694	0.36868
Vstm2b	ENSMUSG00000039257	0.19317	0.36902
Gm19426	ENSMUSG00000097187	0.24573	0.3697
Lsm6	ENSMUSG00000031683	0.15955	0.36978
U2af1	ENSMUSG00000061613	0.20057	0.37025
Cln3	ENSMUSG00000030720	0.18893	0.37035
Ptges	ENSMUSG00000050737	0.2095	0.37035
Gm12411	ENSMUSG00000081559	0.28238	0.37035
Tbca	ENSMUSG00000042043	0.18597	0.37038
Glis1	ENSMUSG00000034762	0.2968	0.37038
Kctd13	ENSMUSG00000030685	0.23453	0.37093
Kcnc4	ENSMUSG00000027895	0.17094	0.37131
Nop16	ENSMUSG00000025869	0.18495	0.37147
Gas2l2	ENSMUSG00000020686	0.26531	0.37178
Ube2l6	ENSMUSG00000027078	0.21192	0.3723
Atg101	ENSMUSG00000037204	0.23054	0.3723
Gm11642	ENSMUSG00000086794	0.28589	0.37259
Itm2b	ENSMUSG00000022108	0.1182	0.37264
Zbtb48	ENSMUSG00000028952	0.23337	0.37264
Htr3a	ENSMUSG00000032269	0.20123	0.37293
Sp7	ENSMUSG00000060284	0.26528	0.37293
Hspb9	ENSMUSG00000017832	0.28813	0.37293
1700026D08Rik	ENSMUSG00000011154	0.29499	0.37293
9430021M05Rik	ENSMUSG00000054457	0.25403	0.37295
Rps16-ps2	ENSMUSG00000060419	0.28639	0.37295
Gm10116	ENSMUSG00000062382	0.29524	0.37295
Pir	ENSMUSG00000031379	0.21014	0.37315
Hba-a2	ENSMUSG00000069917	0.27997	0.37342
Gm12231	ENSMUSG00000044751	0.29502	0.37342
2310010J17Rik	ENSMUSG00000097162	0.24129	0.37367
Gabrq	ENSMUSG00000031344	0.26895	0.37367
Ing2	ENSMUSG00000063049	0.15599	0.37381
Mthfd2	ENSMUSG00000005667	0.19515	0.37381
Prss45	ENSMUSG00000047257	0.28181	0.37381
Pknox2	ENSMUSG00000035934	0.12558	0.37391
Cryz	ENSMUSG00000028199	0.15058	0.37391
Zfp28	ENSMUSG00000062861	0.16495	0.37391
H2afv	ENSMUSG00000041126	0.18899	0.37391
F8a	ENSMUSG00000078317	0.24749	0.37391
RP24-288C12.4	ENSMUSG00000102101	0.26381	0.37391
Gpx7	ENSMUSG00000028597	0.2087	0.37398
Abhd4	ENSMUSG00000040997	0.13887	0.37409
Fam96b	ENSMUSG00000031879	0.25199	0.37414
Ctu1	ENSMUSG00000038888	0.22083	0.37427
Lect1	ENSMUSG00000022025	0.28932	0.37427
Fank1	ENSMUSG00000053111	0.23203	0.37434
Klc3	ENSMUSG00000040714	0.24857	0.37434
Slc25a25	ENSMUSG00000026819	0.14296	0.37477
Hyal2	ENSMUSG00000010047	0.19925	0.37477
Gm10123	ENSMUSG00000062933	0.20187	0.37477
Dhrs1	ENSMUSG00000002332	0.21017	0.3752
Siva1	ENSMUSG00000064326	0.24759	0.37521
Csrp1	ENSMUSG00000026421	0.19571	0.37552
Coa3	ENSMUSG00000017188	0.2282	0.37552
Nt5c	ENSMUSG00000020736	0.23098	0.37552
Gtpbp6	ENSMUSG00000033434	0.23832	0.37552
Rps19bp1	ENSMUSG00000051518	0.24791	0.37552
Pdlim4	ENSMUSG00000020388	0.2691	0.37552
Apol10b	ENSMUSG00000050014	0.29019	0.37552
9330179D12Rik	ENSMUSG00000097166	0.29195	0.37552
Cyb5a	ENSMUSG00000024646	0.17689	0.37575
Rabac1	ENSMUSG00000003380	0.26326	0.37687
Ret	ENSMUSG00000030110	0.28209	0.37687
Cacfd1	ENSMUSG00000015488	0.12483	0.37702
Cops5	ENSMUSG00000025917	0.10373	0.37719
Psenen	ENSMUSG00000036835	0.227	0.37719
Aspscr1	ENSMUSG00000025142	0.23552	0.37719
Fam228b	ENSMUSG00000050545	0.26296	0.37719
Tnni3k	ENSMUSG00000040086	0.28384	0.37719
Stra13	ENSMUSG00000025144	0.22391	0.37761
Gm13889	ENSMUSG00000087006	0.24639	0.37761
Lsm10	ENSMUSG00000050188	0.22846	0.37766
Tmem91	ENSMUSG00000061702	0.22182	0.37775
Orai1	ENSMUSG00000049686	0.26783	0.37775
Rgs16	ENSMUSG00000026475	0.27225	0.37775
Mall	ENSMUSG00000027377	0.28298	0.37775
Srp14	ENSMUSG00000009549	0.17982	0.37819
Sh3glb2	ENSMUSG00000026860	0.24097	0.37819
Mvb12a	ENSMUSG00000031813	0.25813	0.37819
Slc47a1	ENSMUSG00000010122	0.2771	0.37819
Arf2	ENSMUSG00000062421	0.11353	0.37844
Armc7	ENSMUSG00000057219	0.22723	0.37862
Sox17	ENSMUSG00000025902	0.281	0.37915
Rpl28-ps3	ENSMUSG00000079942	0.28418	0.37915
Rsrp1	ENSMUSG00000037266	0.22576	0.37942
Scarf2	ENSMUSG00000012017	0.23164	0.37942
Lrrc46	ENSMUSG00000020878	0.27705	0.37942
Ube2j2	ENSMUSG00000023286	0.16728	0.37953
Sfxn5	ENSMUSG00000033720	0.16277	0.37962
3110082I17Rik	ENSMUSG00000053553	0.20018	0.37964
Atp6ap1l	ENSMUSG00000078958	0.28557	0.37999
Rela	ENSMUSG00000024927	0.20795	0.3808
Pf4	ENSMUSG00000029373	0.28992	0.38091
Arf5	ENSMUSG00000020440	0.25577	0.38111
Cxx1c	ENSMUSG00000051851	0.20666	0.38124
Eif4ebp1	ENSMUSG00000031490	0.26402	0.38138
Gm14303	ENSMUSG00000081344	0.28685	0.3817
Hn1l	ENSMUSG00000024165	0.20465	0.38175
Penk	ENSMUSG00000045573	0.23942	0.3831
Slc20a1	ENSMUSG00000027397	0.15443	0.38328
Ndn	ENSMUSG00000033585	0.16838	0.38342
Pkig	ENSMUSG00000035268	0.22229	0.38352
Polr2j	ENSMUSG00000039771	0.23759	0.38352
Ptpn18	ENSMUSG00000026126	0.28912	0.38352
Akirin2	ENSMUSG00000028291	0.16722	0.38384
Nhp2l1	ENSMUSG00000063480	0.13215	0.38412
Cdhr4	ENSMUSG00000032595	0.28045	0.38415
Thra	ENSMUSG00000058756	0.22869	0.38436
Gm10284	ENSMUSG00000070025	0.28885	0.38436
Cetn3	ENSMUSG00000021537	0.18217	0.38461
Suclg2	ENSMUSG00000061838	0.16127	0.38478
Ost4	ENSMUSG00000038803	0.24084	0.38478
Rtn4rl2	ENSMUSG00000050896	0.27052	0.38515
Psmb3	ENSMUSG00000069744	0.23417	0.38526
Bmp8b	ENSMUSG00000002384	0.28203	0.38526
Pde8a	ENSMUSG00000025584	0.23711	0.38554
Pdlim3	ENSMUSG00000031636	0.2664	0.38554
Yrdc	ENSMUSG00000028889	0.16098	0.38595
Siglech	ENSMUSG00000051504	0.15955	0.38642
Tmem238	ENSMUSG00000030431	0.28327	0.38654
Col3a1	ENSMUSG00000026043	0.2879	0.38654
Trappc3	ENSMUSG00000028847	0.15656	0.38657
Tcirg1	ENSMUSG00000001750	0.24437	0.38657
Lamtor1	ENSMUSG00000030842	0.21088	0.3871
Mtg1	ENSMUSG00000039018	0.16593	0.38712
Adprh	ENSMUSG00000002844	0.18012	0.38712
Fbxl14	ENSMUSG00000030019	0.18561	0.38712
Igsf8	ENSMUSG00000038034	0.22382	0.38712
Isoc2b	ENSMUSG00000052605	0.22573	0.38712
Gm19705	ENSMUSG00000097113	0.28642	0.38712
Gm5345	ENSMUSG00000098050	0.28756	0.38712
Nr2f1	ENSMUSG00000069171	0.13153	0.38735
Bst2	ENSMUSG00000046718	0.20396	0.38735
C1qtnf2	ENSMUSG00000046491	0.28538	0.38735
Med4	ENSMUSG00000022109	0.13355	0.38782
Rit2	ENSMUSG00000057455	0.15984	0.38782
Iscu	ENSMUSG00000025825	0.19966	0.38782
Gm15912	ENSMUSG00000085881	0.22472	0.38782
Mrpl52	ENSMUSG00000010406	0.24165	0.38782
Sgsm2	ENSMUSG00000038351	0.1417	0.38827
Capn12	ENSMUSG00000054083	0.28366	0.38827
Optn	ENSMUSG00000026672	0.15493	0.38835
Mccc2	ENSMUSG00000021646	0.13064	0.38845
Mrpl10	ENSMUSG00000001445	0.13346	0.38845
B630019K06Rik	ENSMUSG00000052364	0.13586	0.38845
Ppp1r3c	ENSMUSG00000067279	0.16997	0.38845
Cav2	ENSMUSG00000000058	0.18309	0.38845
2009-03-01	ENSMUSG00000040502	0.25858	0.38845
Taldo1	ENSMUSG00000025503	0.18149	0.3886
Vwa3b	ENSMUSG00000050122	0.26608	0.3886
Mad2l1bp	ENSMUSG00000034509	0.20326	0.38875
Smoc1	ENSMUSG00000021136	0.16029	0.38885
Gja5	ENSMUSG00000057123	0.28403	0.38896
Mcfd2	ENSMUSG00000024150	0.089874	0.38989
Akt2	ENSMUSG00000004056	0.17432	0.38989
Smarcd3	ENSMUSG00000028949	0.19592	0.38989
Bbc3	ENSMUSG00000002083	0.26579	0.38997
Cyp2j12	ENSMUSG00000081225	0.25942	0.38999
2200002D01Rik	ENSMUSG00000030587	0.28542	0.38999
Ephb1	ENSMUSG00000032537	0.13083	0.39004
Neurl1b	ENSMUSG00000034413	0.15723	0.39017
Gm12279	ENSMUSG00000087120	0.28437	0.39017
Cdr2l	ENSMUSG00000050910	0.13967	0.3903
Pgam1-ps2	ENSMUSG00000082016	0.23427	0.3903
Il17rd	ENSMUSG00000040717	0.22844	0.39048
Prcp	ENSMUSG00000061119	0.16092	0.39064
Plin5	ENSMUSG00000011305	0.2593	0.39064
Zmiz1os1	ENSMUSG00000087535	0.26848	0.39083
Arhgap9	ENSMUSG00000040345	0.26065	0.39112
Wwox	ENSMUSG00000004637	0.17477	0.39132
Cryab	ENSMUSG00000032060	0.22463	0.39132
Gpr62	ENSMUSG00000091735	0.23664	0.39136
Slc39a11	ENSMUSG00000041654	0.14301	0.39146
Nkain4	ENSMUSG00000027574	0.2396	0.39153
Ccdc102a	ENSMUSG00000063605	0.2436	0.3917
RP23-323H18.3	ENSMUSG00000099471	0.2761	0.3917
Cdh20	ENSMUSG00000050840	0.18307	0.39177
Osgep	ENSMUSG00000006289	0.14351	0.39181
Tmem108	ENSMUSG00000042757	0.12511	0.3919
Fez1	ENSMUSG00000032118	0.12635	0.3919
Ptrf	ENSMUSG00000004044	0.20241	0.3919
Smarcd1	ENSMUSG00000023018	0.14886	0.39213
Ccdc23	ENSMUSG00000028643	0.19953	0.39219
Cops7b	ENSMUSG00000026240	0.16081	0.39243
BC029214	ENSMUSG00000047617	0.23383	0.39243
Polr2d	ENSMUSG00000024258	0.17238	0.39255
B9d1	ENSMUSG00000001039	0.21103	0.39263
Cmtm6	ENSMUSG00000032434	0.1359	0.39266
Zbed3	ENSMUSG00000041995	0.14808	0.39315
Irx1	ENSMUSG00000060969	0.19748	0.39315
Prpf19	ENSMUSG00000024735	0.12135	0.39316
Dact3	ENSMUSG00000078794	0.26737	0.39316
2010001K21Rik	ENSMUSG00000051606	0.28343	0.39326
Mmgt2	ENSMUSG00000048497	0.22059	0.39377
Parp3	ENSMUSG00000023249	0.22575	0.39409
Rpl27-ps3	ENSMUSG00000073640	0.26214	0.39409
Mapk7	ENSMUSG00000001034	0.22036	0.39455
Rasip1	ENSMUSG00000044562	0.19717	0.3948
Slc2a10	ENSMUSG00000027661	0.24694	0.3948
Mgat1	ENSMUSG00000020346	0.16085	0.39514
Acsf3	ENSMUSG00000015016	0.20634	0.3952
Uap1l1	ENSMUSG00000026956	0.22497	0.3952
Zfp687	ENSMUSG00000019338	0.11351	0.39538
Snrpd3	ENSMUSG00000020180	0.13473	0.39554
Gm4980	ENSMUSG00000096606	0.21503	0.39557
Ybx2	ENSMUSG00000018554	0.26359	0.39557
Dnajc4	ENSMUSG00000024963	0.23952	0.3959
Tmem14a	ENSMUSG00000025933	0.13281	0.39607
Med31	ENSMUSG00000020801	0.16176	0.39611
Agpat4	ENSMUSG00000023827	0.19563	0.39632
Mmel1	ENSMUSG00000058183	0.28215	0.39632
Col6a1	ENSMUSG00000001119	0.24794	0.39637
Park2	ENSMUSG00000023826	0.20365	0.39643
Sh3bp1	ENSMUSG00000022436	0.21627	0.39643
Tomm5	ENSMUSG00000078713	0.18967	0.39684
Gpr6	ENSMUSG00000046922	0.27888	0.39688
Ak7	ENSMUSG00000041323	0.28152	0.39688
Get4	ENSMUSG00000025858	0.18792	0.39723
Cacng3	ENSMUSG00000066189	0.20745	0.39731
Gabrd	ENSMUSG00000029054	0.24886	0.39731
A330048O09Rik	ENSMUSG00000097326	0.24938	0.39731
Ngrn	ENSMUSG00000047084	0.1547	0.39746
Mrpl14	ENSMUSG00000023939	0.2449	0.39746
Gm10643	ENSMUSG00000074215	0.2531	0.39781
Gm17383	ENSMUSG00000058625	0.28033	0.39781
Gpr88	ENSMUSG00000068696	0.28124	0.39781
Cnbp	ENSMUSG00000030057	0.073454	0.3979
Rfx2	ENSMUSG00000024206	0.19079	0.398
Parp12	ENSMUSG00000038507	0.21563	0.398
Cd209f	ENSMUSG00000051906	0.26554	0.398
Sp110	ENSMUSG00000070034	0.27245	0.398
Styxl1	ENSMUSG00000019178	0.279	0.398
Car5b	ENSMUSG00000031373	0.18604	0.39828
Hba-a1	ENSMUSG00000069919	0.25986	0.39828
Rps14	ENSMUSG00000024608	0.22591	0.39834
Rgs13	ENSMUSG00000051079	0.26873	0.39834
Lpo	ENSMUSG00000009356	0.27271	0.39859
Ube2e2	ENSMUSG00000058317	0.14952	0.39868
Xrcc6bp1	ENSMUSG00000025436	0.17617	0.39946
Mlc1	ENSMUSG00000035805	0.10061	0.39947
Slc19a1	ENSMUSG00000001436	0.15869	0.39969
Ak4	ENSMUSG00000028527	0.174	0.39969
Mical1	ENSMUSG00000019823	0.19128	0.39969
Plcxd1	ENSMUSG00000064247	0.19769	0.39969
Cdk5rap3	ENSMUSG00000018669	0.21317	0.39969
Fam71e1	ENSMUSG00000051113	0.22732	0.39969
Gm7846	ENSMUSG00000086240	0.27827	0.39969
Sp8	ENSMUSG00000048562	0.27983	0.39969
Taz	ENSMUSG00000009995	0.11573	0.39981
C77080	ENSMUSG00000050390	0.17581	0.40029
Slc25a10	ENSMUSG00000025792	0.24152	0.40029
Rpl9-ps4	ENSMUSG00000094989	0.27661	0.40029
Pomgnt2	ENSMUSG00000066235	0.17618	0.40031
Snrnp25	ENSMUSG00000040767	0.23282	0.40031
Slc45a2	ENSMUSG00000022243	0.27429	0.40035
Fam166b	ENSMUSG00000042788	0.27918	0.40035
Wnt9b	ENSMUSG00000018486	0.26353	0.40042
Dlx2	ENSMUSG00000023391	0.2005	0.40063
Mrpl37	ENSMUSG00000028622	0.1831	0.40086
Bhlhe40	ENSMUSG00000030103	0.17013	0.40099
Usb1	ENSMUSG00000031792	0.18218	0.40108
Stk19	ENSMUSG00000061207	0.22887	0.40109
Glrx5	ENSMUSG00000021102	0.23555	0.40109
Col11a2	ENSMUSG00000024330	0.23725	0.40109
Nhlh1	ENSMUSG00000051251	0.24303	0.40109
4632411P08Rik	ENSMUSG00000097561	0.27883	0.40109
Tpd52l2	ENSMUSG00000000827	0.14137	0.40114
Spag8	ENSMUSG00000066196	0.27039	0.40143
Epha8	ENSMUSG00000028661	0.25785	0.40161
Orc6	ENSMUSG00000031697	0.13936	0.4018
Gm13456	ENSMUSG00000082536	0.19692	0.4021
Klhl25	ENSMUSG00000055652	0.17309	0.40214
Ctsh	ENSMUSG00000032359	0.15964	0.40218
Gm12366	ENSMUSG00000082762	0.24444	0.40218
Rassf1	ENSMUSG00000010067	0.17483	0.40245
Lamtor2	ENSMUSG00000028062	0.21903	0.40249
Rpl39-ps	ENSMUSG00000036305	0.26457	0.40249
Cdhr3	ENSMUSG00000035860	0.27171	0.40249
4930506C21Rik	ENSMUSG00000087478	0.27512	0.40263
Isg15	ENSMUSG00000035692	0.25425	0.40311
Pim1	ENSMUSG00000024014	0.22316	0.40333
Prrg1	ENSMUSG00000047996	0.20236	0.40356
Gm12174	ENSMUSG00000080776	0.27643	0.40356
Gnb2	ENSMUSG00000029713	0.23765	0.40454
Clasrp	ENSMUSG00000061028	0.2194	0.40476
Tead3	ENSMUSG00000002249	0.22388	0.40644
Smg8	ENSMUSG00000020495	0.15951	0.40703
1810043H04Rik	ENSMUSG00000078572	0.2343	0.40703
Gm12918	ENSMUSG00000066315	0.27482	0.40703
Tor1a	ENSMUSG00000026849	0.14636	0.40707
Phb2	ENSMUSG00000004264	0.18558	0.40726
Tgm2	ENSMUSG00000037820	0.19083	0.40726
Tph1	ENSMUSG00000040046	0.22671	0.40726
Lims2	ENSMUSG00000024395	0.24197	0.40726
Cox6a1	ENSMUSG00000041697	0.24421	0.40726
Gdf9	ENSMUSG00000018238	0.25173	0.40726
Agt	ENSMUSG00000031980	0.25853	0.40726
Pcdh11x	ENSMUSG00000034755	0.26587	0.40726
Dyx1c1	ENSMUSG00000092192	0.26821	0.40726
Ms4a6b	ENSMUSG00000024677	0.27069	0.40726
Sphk1	ENSMUSG00000061878	0.26382	0.40746
Ppp1r15a	ENSMUSG00000040435	0.16389	0.40768
Gm15427	ENSMUSG00000081051	0.27174	0.40809
Gm12976	ENSMUSG00000087575	0.25752	0.40831
Gm26660	ENSMUSG00000097601	0.27318	0.40831
Mrps33	ENSMUSG00000029918	0.17489	0.40848
Selo	ENSMUSG00000035757	0.12218	0.40862
Mnt	ENSMUSG00000000282	0.13563	0.40862
Rhpn2	ENSMUSG00000030494	0.18564	0.40862
Lsm5	ENSMUSG00000091625	0.18767	0.40862
Zfp566	ENSMUSG00000078768	0.24266	0.40862
Lck	ENSMUSG00000000409	0.24176	0.40893
Polr2f	ENSMUSG00000033020	0.23601	0.40923
Sri	ENSMUSG00000003161	0.095518	0.40927
Rps21	ENSMUSG00000039001	0.21666	0.40927
Urm1	ENSMUSG00000069020	0.21937	0.40927
Gm14284	ENSMUSG00000082044	0.27443	0.40927
Wnt3	ENSMUSG00000000125	0.2748	0.40927
Ormdl3	ENSMUSG00000038150	0.14557	0.40952
Trp53	ENSMUSG00000059552	0.159	0.40952
Cstb	ENSMUSG00000005054	0.13315	0.40953
Gstm7	ENSMUSG00000004035	0.19396	0.40974
Zbtb22	ENSMUSG00000051390	0.15089	0.40982
Dhodh	ENSMUSG00000031730	0.11867	0.41026
Mettl24	ENSMUSG00000045555	0.25166	0.41026
Nudt4	ENSMUSG00000020029	0.14994	0.41058
Mavs	ENSMUSG00000037523	0.15126	0.41058
Cenph	ENSMUSG00000045273	0.26686	0.41058
0610040F04Rik	ENSMUSG00000087341	0.27269	0.41058
Cradd	ENSMUSG00000045867	0.19491	0.41157
Naprt1	ENSMUSG00000022574	0.23887	0.41184
Rpl39	ENSMUSG00000079641	0.20919	0.41206
Gm15337	ENSMUSG00000085289	0.27131	0.41212
Dcun1d5	ENSMUSG00000032002	0.11082	0.41238
Sqstm1	ENSMUSG00000015837	0.16872	0.41238
Adora2b	ENSMUSG00000018500	0.19429	0.41238
Cercam	ENSMUSG00000039787	0.20906	0.41238
D730003I15Rik	ENSMUSG00000073478	0.25025	0.41238
1700101E01Rik	ENSMUSG00000079502	0.27316	0.41238
Ypel4	ENSMUSG00000034059	0.16269	0.41305
Dkkl1	ENSMUSG00000030792	0.26587	0.41305
Mapkapk2	ENSMUSG00000016528	0.12657	0.41366
Psmb8	ENSMUSG00000024338	0.27186	0.41371
Zswim7	ENSMUSG00000014243	0.21486	0.4146
Alkbh7	ENSMUSG00000002661	0.21014	0.41479
Dpy19l2	ENSMUSG00000085576	0.2715	0.4153
Gm7331	ENSMUSG00000059461	0.26938	0.4154
Pgam2	ENSMUSG00000020475	0.18582	0.41552
Rps18	ENSMUSG00000008668	0.20179	0.41561
Mpst	ENSMUSG00000071711	0.23543	0.41561
Clybl	ENSMUSG00000025545	0.16491	0.41572
Pcp4l1	ENSMUSG00000038370	0.225	0.41574
Gdf11	ENSMUSG00000025352	0.13861	0.41633
Ndufb6	ENSMUSG00000071014	0.20397	0.41638
Cntn6	ENSMUSG00000030092	0.22671	0.41649
Fam114a1	ENSMUSG00000029185	0.22712	0.41649
A330040F15Rik	ENSMUSG00000086213	0.2625	0.41649
Gm10146	ENSMUSG00000064317	0.27165	0.41649
Zfand1	ENSMUSG00000039795	0.15825	0.41663
2010320O07Rik	ENSMUSG00000089983	0.26876	0.41663
Gm12396	ENSMUSG00000056412	0.27016	0.41663
Trim11	ENSMUSG00000020455	0.17327	0.41668
Cacna1s	ENSMUSG00000026407	0.26206	0.41695
Mtfr1l	ENSMUSG00000046671	0.10251	0.41718
Tmem134	ENSMUSG00000024845	0.22901	0.41718
Gm20900	ENSMUSG00000078180	0.25149	0.41729
Polr2g	ENSMUSG00000071662	0.16849	0.41731
2410015M20Rik	ENSMUSG00000049760	0.21941	0.41731
Cstad	ENSMUSG00000047363	0.23227	0.41732
Slc25a38	ENSMUSG00000032519	0.1235	0.41733
Fam131a	ENSMUSG00000050821	0.17335	0.41733
Ddrgk1	ENSMUSG00000068290	0.20655	0.41733
Gm13841	ENSMUSG00000083833	0.26445	0.41733
Prkg2	ENSMUSG00000029334	0.26953	0.41733
Ppp1r35	ENSMUSG00000029725	0.25648	0.41748
Nle1	ENSMUSG00000020692	0.18366	0.41751
Pcbp4	ENSMUSG00000023495	0.24054	0.4183
Gdf10	ENSMUSG00000021943	0.12259	0.41851
Shmt2	ENSMUSG00000025403	0.19226	0.41851
6430628N08Rik	ENSMUSG00000034185	0.23212	0.41851
Thbs1	ENSMUSG00000040152	0.26936	0.41851
Cib1	ENSMUSG00000030538	0.20218	0.41854
Ergic3	ENSMUSG00000005881	0.22721	0.41879
R74862	ENSMUSG00000059277	0.22841	0.41894
9330020H09Rik	ENSMUSG00000091050	0.27008	0.41894
Akt1	ENSMUSG00000001729	0.17875	0.41898
Cd33	ENSMUSG00000004609	0.23856	0.41898
Dhcr24	ENSMUSG00000034926	0.14811	0.41902
Smim8	ENSMUSG00000028295	0.15796	0.41902
Mcpt4	ENSMUSG00000061068	0.18583	0.41902
Mrpl3	ENSMUSG00000032563	0.079897	0.41915
Swi5	ENSMUSG00000044627	0.17325	0.41915
Trac	ENSMUSG00000076928	0.26594	0.41915
Cdhr2	ENSMUSG00000034918	0.26976	0.41919
Gsr	ENSMUSG00000031584	0.13995	0.41959
Rbp3	ENSMUSG00000041534	0.1477	0.41959
Eci1	ENSMUSG00000024132	0.19045	0.41959
Gm27202	ENSMUSG00000098424	0.2235	0.41959
St8sia2	ENSMUSG00000025789	0.25046	0.41959
Mei1	ENSMUSG00000068117	0.2688	0.41959
Trappc4	ENSMUSG00000032112	0.16175	0.41969
Rp9	ENSMUSG00000032239	0.18251	0.41969
Cby1	ENSMUSG00000022428	0.17937	0.41974
Fermt3	ENSMUSG00000024965	0.2143	0.41974
2310036O22Rik	ENSMUSG00000041203	0.22046	0.41974
Zmynd19	ENSMUSG00000026974	0.11339	0.41994
Arl6ip4	ENSMUSG00000029404	0.2181	0.41994
AI846148	ENSMUSG00000024970	0.19351	0.41996
Zbtb17	ENSMUSG00000006215	0.18877	0.42016
Dtd2	ENSMUSG00000020956	0.13333	0.42073
Mrpl43	ENSMUSG00000025208	0.1862	0.42073
Rnf166	ENSMUSG00000014470	0.19828	0.42073
Wdr93	ENSMUSG00000039099	0.26511	0.42073
Zcrb1	ENSMUSG00000022635	0.17311	0.42082
Smim19	ENSMUSG00000031534	0.19832	0.42082
Nxt1	ENSMUSG00000036992	0.21267	0.42082
Ly6h	ENSMUSG00000022577	0.26057	0.42082
Pbx2	ENSMUSG00000034673	0.13843	0.42085
Mrpl33	ENSMUSG00000029142	0.1815	0.42085
Col9a2	ENSMUSG00000028626	0.24173	0.42085
Ift43	ENSMUSG00000007867	0.1943	0.42103
Nrep	ENSMUSG00000042834	0.19614	0.42103
Rom1	ENSMUSG00000071648	0.21617	0.42103
Ccdc80	ENSMUSG00000022665	0.2162	0.42103
Srpx2	ENSMUSG00000031253	0.24792	0.42103
Fgf18	ENSMUSG00000057967	0.20423	0.42109
Mrpl57	ENSMUSG00000021967	0.17914	0.42116
Actr5	ENSMUSG00000037761	0.18131	0.4212
Ppih	ENSMUSG00000060288	0.20217	0.4212
Mmp2	ENSMUSG00000031740	0.21288	0.4212
Tac2	ENSMUSG00000025400	0.2096	0.42135
Cox4i2	ENSMUSG00000009876	0.25295	0.42138
Asb2	ENSMUSG00000021200	0.24684	0.42162
Zmynd12	ENSMUSG00000070806	0.2675	0.42173
4930599N23Rik	ENSMUSG00000073144	0.26786	0.42175
A730017C20Rik	ENSMUSG00000050875	0.13048	0.42207
Ccdc115	ENSMUSG00000042111	0.13461	0.42207
Rps6-ps4	ENSMUSG00000081406	0.26062	0.4221
Bid	ENSMUSG00000004446	0.13611	0.42235
Rrs1	ENSMUSG00000061024	0.14893	0.42235
Lgals8	ENSMUSG00000057554	0.15424	0.42235
Cd37	ENSMUSG00000030798	0.24204	0.42235
Ccdc32	ENSMUSG00000039983	0.10786	0.42268
Rilpl2	ENSMUSG00000029401	0.16235	0.42268
[truncated: 10,077 more rows]

## Sheet: Downregulated DEGs
Gene Name	Gene ID	log2FoldChange	q-value
Fam107a	ENSMUSG00000021750	-0.67162	2.6669e-20
Acot11	ENSMUSG00000034853	-0.754	3.5842e-17
Fst	ENSMUSG00000021765	-1.4291	8.7998e-15
Atp2c2	ENSMUSG00000034112	-1.0401	2.6688e-12
Ezr	ENSMUSG00000052397	-0.4516	1.0297e-10
Hip1	ENSMUSG00000039959	-0.71288	3.7349e-10
Kirrel2	ENSMUSG00000036915	-0.95181	2.7862e-09
Plin4	ENSMUSG00000002831	-1.1738	3.8339e-09
Wipf3	ENSMUSG00000086040	-0.60762	2.5069e-08
Exoc6b	ENSMUSG00000033769	-0.5393	2.5069e-08
Daam2	ENSMUSG00000040260	-0.485	2.5069e-08
Mertk	ENSMUSG00000014361	-0.7844	2.9368e-08
Sult1a1	ENSMUSG00000030711	-0.8965	3.3905e-08
Nedd4l	ENSMUSG00000024589	-0.44338	3.9306e-07
Ociad2	ENSMUSG00000029153	-0.34363	6.9142e-06
Dsp	ENSMUSG00000054889	-0.56965	1.1311e-05
Hif3a	ENSMUSG00000004328	-0.86133	1.7351e-05
Kcnk1	ENSMUSG00000033998	-0.32334	1.8924e-05
Adamts14	ENSMUSG00000059901	-0.81478	2.4786e-05
Pdzd2	ENSMUSG00000022197	-0.80969	3.5715e-05
Scn3b	ENSMUSG00000049281	-0.41165	3.7055e-05
Cdh19	ENSMUSG00000047216	-0.78627	3.7823e-05
Wnt9a	ENSMUSG00000000126	-0.69609	3.7823e-05
Dhx33	ENSMUSG00000040620	-0.53529	4.3879e-05
Slc25a42	ENSMUSG00000002346	-0.41206	4.5699e-05
Ppp4r4	ENSMUSG00000021209	-0.44139	5.5657e-05
Dio2	ENSMUSG00000007682	-0.41552	7.7151e-05
Srl	ENSMUSG00000022519	-0.44051	8.7013e-05
Fgfr3	ENSMUSG00000054252	-0.47297	8.8307e-05
Phka1	ENSMUSG00000034055	-0.35976	0.00010859
Mlh3	ENSMUSG00000021245	-0.34829	0.00017486
Arhgap26	ENSMUSG00000036452	-0.31976	0.00022819
Per3	ENSMUSG00000028957	-0.59819	0.00027148
Usp40	ENSMUSG00000005501	-0.52792	0.00034962
Lgi1	ENSMUSG00000067242	-0.26979	0.00035342
Lrrc8c	ENSMUSG00000054720	-0.43743	0.00041959
Mettl11b	ENSMUSG00000040113	-0.79224	0.00042414
Rtp1	ENSMUSG00000033383	-0.82319	0.00044682
Slc6a17	ENSMUSG00000027894	-0.2829	0.00044682
Sorl1	ENSMUSG00000049313	-0.44332	0.0004515
Fmo2	ENSMUSG00000040170	-0.80916	0.00053072
Chrm3	ENSMUSG00000046159	-0.46883	0.000558
Med1	ENSMUSG00000018160	-0.27028	0.00056048
Anxa11	ENSMUSG00000021866	-0.46078	0.00061504
Cers4	ENSMUSG00000008206	-0.27834	0.00065607
Ak3	ENSMUSG00000024782	-0.36152	0.00068757
Golm1	ENSMUSG00000021556	-0.42093	0.00079062
Prkca	ENSMUSG00000050965	-0.46671	0.00083025
Eltd1	ENSMUSG00000039167	-0.41748	0.001083
Epas1	ENSMUSG00000024140	-0.30987	0.001083
Kcna4	ENSMUSG00000042604	-0.52532	0.0011178
Hhex	ENSMUSG00000024986	-0.69208	0.0012075
Shisa7	ENSMUSG00000053550	-0.42305	0.0012589
Plekho2	ENSMUSG00000050721	-0.43761	0.0014345
Npnt	ENSMUSG00000040998	-0.55104	0.0014504
Cacna1h	ENSMUSG00000024112	-0.53968	0.0014508
Aldh1a1	ENSMUSG00000053279	-0.30448	0.0014638
Slc25a34	ENSMUSG00000040740	-0.42754	0.0014871
Peak1	ENSMUSG00000074305	-0.50918	0.0015996
Itga11	ENSMUSG00000032243	-0.53666	0.0017461
Ptplb	ENSMUSG00000035376	-0.32554	0.001963
Rasal2	ENSMUSG00000070565	-0.53485	0.001982
Ctif	ENSMUSG00000052928	-0.36487	0.0019839
Elmo2	ENSMUSG00000017670	-0.28409	0.0020054
Dcun1d1	ENSMUSG00000027708	-0.24868	0.0023858
Lao1	ENSMUSG00000024903	-0.72907	0.0025624
9330159F19Rik	ENSMUSG00000004360	-0.24578	0.0026017
Gm14827	ENSMUSG00000084904	-0.71606	0.0026336
Gpr22	ENSMUSG00000044067	-0.47623	0.002725
Hsp90b1	ENSMUSG00000020048	-0.29683	0.002725
A430105I19Rik	ENSMUSG00000045838	-0.47614	0.0027758
Kcna1	ENSMUSG00000047976	-0.46056	0.0027758
Ikbkb	ENSMUSG00000031537	-0.26679	0.0027758
8030453O22Rik	ENSMUSG00000085058	-0.55003	0.0029511
Fndc1	ENSMUSG00000071984	-0.5435	0.0031201
Lct	ENSMUSG00000026354	-0.41233	0.0031201
Ptprj	ENSMUSG00000025314	-0.32599	0.0031201
Lrrc58	ENSMUSG00000034158	-0.31406	0.0031425
Galnt15	ENSMUSG00000021903	-0.64156	0.0031857
Strip2	ENSMUSG00000039629	-0.57174	0.0032893
Cacna1e	ENSMUSG00000004110	-0.39285	0.0033903
Cachd1	ENSMUSG00000028532	-0.39171	0.0033903
Lman2	ENSMUSG00000021484	-0.29522	0.0036891
Efr3b	ENSMUSG00000020658	-0.39932	0.0036941
Smim3	ENSMUSG00000038059	-0.37631	0.0038264
Sorcs2	ENSMUSG00000029093	-0.28962	0.0038711
Abcc9	ENSMUSG00000030249	-0.53996	0.0039038
9230112E08Rik	ENSMUSG00000070461	-0.31439	0.0041786
Mfsd2a	ENSMUSG00000028655	-0.57089	0.0044641
Fkbp5	ENSMUSG00000024222	-0.50889	0.0044641
Ksr1	ENSMUSG00000018334	-0.43932	0.0044641
Ap2b1	ENSMUSG00000035152	-0.40387	0.0045174
Micalcl	ENSMUSG00000030771	-0.63982	0.004536
Farp1	ENSMUSG00000025555	-0.29734	0.0045637
Xdh	ENSMUSG00000024066	-0.66624	0.0048883
Npy1r	ENSMUSG00000036437	-0.46894	0.0049977
Kcnq2	ENSMUSG00000016346	-0.38722	0.00503
Map1b	ENSMUSG00000052727	-0.31451	0.005448
Tmem70	ENSMUSG00000025940	-0.2392	0.0056258
Drd5	ENSMUSG00000039358	-0.41343	0.0058369
Ror1	ENSMUSG00000035305	-0.60565	0.0059036
Sorcs3	ENSMUSG00000063434	-0.48219	0.0059187
Pitpnm2	ENSMUSG00000029406	-0.29018	0.0061678
Fam212b	ENSMUSG00000048458	-0.34155	0.0062846
Zbtb20	ENSMUSG00000022708	-0.41374	0.0070795
Ago3	ENSMUSG00000028842	-0.36738	0.0070805
Shisa6	ENSMUSG00000053930	-0.50376	0.007269
Ppm1l	ENSMUSG00000027784	-0.34546	0.007269
Ccnt2	ENSMUSG00000026349	-0.3605	0.0078389
Megf6	ENSMUSG00000057751	-0.46705	0.0080694
Helb	ENSMUSG00000020228	-0.52883	0.0082868
Rasgrf2	ENSMUSG00000021708	-0.39142	0.008499
Wbscr17	ENSMUSG00000034040	-0.33852	0.008499
Acan	ENSMUSG00000030607	-0.44728	0.0085037
Nt5dc3	ENSMUSG00000054027	-0.36765	0.0086029
Serpina3n	ENSMUSG00000021091	-0.35227	0.008739
Pla2g3	ENSMUSG00000034579	-0.60745	0.0090284
Tfcp2l1	ENSMUSG00000026380	-0.48442	0.009175
Zbtb40	ENSMUSG00000060862	-0.40387	0.0094538
Hrk	ENSMUSG00000046607	-0.31692	0.0094764
Cacnb2	ENSMUSG00000057914	-0.39447	0.0096042
Wisp2	ENSMUSG00000027656	-0.6493	0.0096288
Iqgap2	ENSMUSG00000021676	-0.56785	0.0096696
Gm11627	ENSMUSG00000078640	-0.56158	0.0096696
5330426P16Rik	ENSMUSG00000022639	-0.34543	0.0096696
Orai2	ENSMUSG00000039747	-0.30505	0.0098758
Canx	ENSMUSG00000020368	-0.16744	0.010105
Pnpla7	ENSMUSG00000036833	-0.3672	0.010257
Fam21	ENSMUSG00000024104	-0.30861	0.010257
Epha6	ENSMUSG00000055540	-0.48107	0.01064
Scgb3a1	ENSMUSG00000064057	-0.61082	0.011036
Atf6	ENSMUSG00000026663	-0.43072	0.011036
Tmem52	ENSMUSG00000023153	-0.64376	0.011143
Ryr1	ENSMUSG00000030592	-0.43137	0.011158
Kcnj2	ENSMUSG00000041695	-0.58991	0.011187
Plcb2	ENSMUSG00000040061	-0.48373	0.011383
Sema3c	ENSMUSG00000028780	-0.50109	0.011407
Tbc1d4	ENSMUSG00000033083	-0.52901	0.011429
Usp2	ENSMUSG00000032010	-0.28309	0.011429
Epha10	ENSMUSG00000028876	-0.3475	0.011733
Zmynd8	ENSMUSG00000039671	-0.30063	0.011801
Lair1	ENSMUSG00000055541	-0.41819	0.01193
Ppm1h	ENSMUSG00000034613	-0.33015	0.011965
Itga9	ENSMUSG00000039115	-0.40067	0.012073
Als2	ENSMUSG00000026024	-0.51015	0.012095
Parp1	ENSMUSG00000026496	-0.32797	0.012095
Paqr8	ENSMUSG00000025931	-0.36047	0.012229
Atp10a	ENSMUSG00000025324	-0.57066	0.012268
Zc3h6	ENSMUSG00000042851	-0.4459	0.013118
Rngtt	ENSMUSG00000028274	-0.38157	0.013518
Hmgn5	ENSMUSG00000031245	-0.29671	0.013678
Acap2	ENSMUSG00000049076	-0.38384	0.013806
Rnf165	ENSMUSG00000025427	-0.34714	0.013806
Plxna4	ENSMUSG00000029765	-0.505	0.014085
Fam217b	ENSMUSG00000070476	-0.24844	0.014147
Homer3	ENSMUSG00000003573	-0.38376	0.014173
Rprd2	ENSMUSG00000028106	-0.24701	0.01421
Endod1	ENSMUSG00000037419	-0.26981	0.015034
Tmem181b-ps	ENSMUSG00000096780	-0.4887	0.015038
Arhgef28	ENSMUSG00000021662	-0.40425	0.015079
Slc38a2	ENSMUSG00000022462	-0.35409	0.015192
Crot	ENSMUSG00000003623	-0.32387	0.01568
Dclk1	ENSMUSG00000027797	-0.35114	0.015698
Tmem82	ENSMUSG00000043085	-0.62694	0.015823
Ctla2a	ENSMUSG00000044258	-0.44891	0.015823
Ahcyl2	ENSMUSG00000029772	-0.44514	0.015823
Lgr6	ENSMUSG00000042793	-0.39733	0.015823
Zhx3	ENSMUSG00000035877	-0.37539	0.015823
Abr	ENSMUSG00000017631	-0.31968	0.015823
Trib2	ENSMUSG00000020601	-0.33054	0.016016
Fbxo34	ENSMUSG00000037536	-0.23613	0.016148
Hspa1l	ENSMUSG00000007033	-0.58394	0.016675
Tbccd1	ENSMUSG00000004462	-0.26408	0.017424
Sms	ENSMUSG00000071708	-0.24549	0.018972
Ly6c1	ENSMUSG00000079018	-0.48317	0.019033
Srgap3	ENSMUSG00000030257	-0.31523	0.019165
Pkp2	ENSMUSG00000041957	-0.40075	0.019275
Luzp1	ENSMUSG00000001089	-0.34644	0.019312
Prkcb	ENSMUSG00000052889	-0.30666	0.019462
Prom1	ENSMUSG00000029086	-0.38421	0.019765
Rbfox2	ENSMUSG00000033565	-0.27586	0.019844
Il12rb2	ENSMUSG00000018341	-0.42513	0.02077
Tanc1	ENSMUSG00000035168	-0.40861	0.02114
Pabpc1	ENSMUSG00000022283	-0.19353	0.02114
Uhrf1bp1l	ENSMUSG00000019951	-0.36392	0.021318
Chrm5	ENSMUSG00000074939	-0.60034	0.022031
Crhbp	ENSMUSG00000021680	-0.395	0.022746
Cdc7	ENSMUSG00000029283	-0.42558	0.022811
Gm27252	ENSMUSG00000098708	-0.57238	0.022905
Gpr83	ENSMUSG00000031932	-0.35611	0.023507
Mkl1	ENSMUSG00000042292	-0.3657	0.023576
Zfp143	ENSMUSG00000061079	-0.35433	0.023675
Sphkap	ENSMUSG00000026163	-0.50447	0.023702
Htra1	ENSMUSG00000006205	-0.45044	0.02378
Trim2	ENSMUSG00000027993	-0.44278	0.023825
Slit1	ENSMUSG00000025020	-0.35579	0.023845
Pdgfrb	ENSMUSG00000024620	-0.27688	0.023845
Stk32a	ENSMUSG00000039954	-0.45461	0.024054
Mkl2	ENSMUSG00000009569	-0.30161	0.024173
Phf20	ENSMUSG00000038116	-0.39977	0.024412
Chordc1	ENSMUSG00000001774	-0.33352	0.024412
Tlk2	ENSMUSG00000020694	-0.19376	0.024412
Plcg1	ENSMUSG00000016933	-0.24496	0.024679
Zcchc5	ENSMUSG00000047686	-0.46054	0.024828
Zfp280d	ENSMUSG00000038535	-0.43256	0.024888
Hsph1	ENSMUSG00000029657	-0.30488	0.024919
Ccbe1	ENSMUSG00000046318	-0.4437	0.024997
Atg2b	ENSMUSG00000041341	-0.33155	0.02559
Neurod1	ENSMUSG00000034701	-0.31535	0.02559
Fam114a2	ENSMUSG00000020523	-0.25588	0.02563
Tns1	ENSMUSG00000055322	-0.30009	0.025796
Azin1	ENSMUSG00000037458	-0.37907	0.025801
Clip1	ENSMUSG00000049550	-0.35674	0.025817
Nmnat2	ENSMUSG00000042751	-0.20867	0.025817
Rab27a	ENSMUSG00000032202	-0.35148	0.025959
B430212C06Rik	ENSMUSG00000046415	-0.43921	0.026912
Aass	ENSMUSG00000029695	-0.4853	0.027
Dnajc18	ENSMUSG00000024350	-0.20029	0.027644
Camk1d	ENSMUSG00000039145	-0.39499	0.028462
Slc4a8	ENSMUSG00000023032	-0.30431	0.028555
Ppm1e	ENSMUSG00000046442	-0.45677	0.028589
Nfasc	ENSMUSG00000026442	-0.36675	0.028872
Pgm2l1	ENSMUSG00000030729	-0.32717	0.028896
Itpr2	ENSMUSG00000030287	-0.35884	0.028904
2610008E11Rik	ENSMUSG00000060301	-0.26365	0.028904
Slc45a4	ENSMUSG00000079020	-0.19818	0.029
Plb1	ENSMUSG00000029134	-0.49878	0.029058
Cacna2d3	ENSMUSG00000021991	-0.2609	0.029058
Glul	ENSMUSG00000026473	-0.22013	0.029099
Zfp810	ENSMUSG00000066829	-0.39042	0.030487
Spire1	ENSMUSG00000024533	-0.32268	0.030495
Gm5141	ENSMUSG00000091183	-0.56452	0.030846
Stim2	ENSMUSG00000039156	-0.25514	0.031012
Strn	ENSMUSG00000024077	-0.28089	0.031029
Gtpbp2	ENSMUSG00000023952	-0.27503	0.031357
1110002E22Rik	ENSMUSG00000090066	-0.52208	0.031541
Hk2	ENSMUSG00000000628	-0.35815	0.031576
Ntf3	ENSMUSG00000049107	-0.34809	0.031644
Arl8b	ENSMUSG00000030105	-0.17326	0.031689
Il16	ENSMUSG00000001741	-0.30371	0.032064
Usp54	ENSMUSG00000034235	-0.34555	0.032346
Abcb10	ENSMUSG00000031974	-0.27198	0.032461
Dnah17	ENSMUSG00000033987	-0.57366	0.03248
Serpinb8	ENSMUSG00000026315	-0.53623	0.03248
Cpt1a	ENSMUSG00000024900	-0.36599	0.03248
Nckap1	ENSMUSG00000027002	-0.30665	0.03248
Gm10699	ENSMUSG00000074461	-0.28267	0.03248
Slc24a2	ENSMUSG00000037996	-0.40821	0.032868
Zfp207	ENSMUSG00000017421	-0.2209	0.033082
Rab9b	ENSMUSG00000043463	-0.27227	0.034246
Klhdc7a	ENSMUSG00000078234	-0.31603	0.034739
Zfp719	ENSMUSG00000030469	-0.36563	0.034902
Tmprss6	ENSMUSG00000016942	-0.56998	0.035299
Skil	ENSMUSG00000027660	-0.38088	0.035299
Otos	ENSMUSG00000044055	-0.5506	0.036195
Ubr4	ENSMUSG00000066036	-0.23779	0.036195
D430041D05Rik	ENSMUSG00000068373	-0.33647	0.036832
Siae	ENSMUSG00000001942	-0.24564	0.037563
Celf2	ENSMUSG00000002107	-0.19993	0.037736
Epha7	ENSMUSG00000028289	-0.30428	0.037917
Grik4	ENSMUSG00000032017	-0.29682	0.038389
RP23-191A12.6	ENSMUSG00000100929	-0.56269	0.03916
Hdlbp	ENSMUSG00000034088	-0.28501	0.039225
Zfp81	ENSMUSG00000003929	-0.35639	0.039335
Nrde2	ENSMUSG00000021179	-0.31148	0.039335
Clvs2	ENSMUSG00000019785	-0.21075	0.040107
Fam160a1	ENSMUSG00000051000	-0.39497	0.040294
Lsm11	ENSMUSG00000044847	-0.29021	0.040399
Prkag2	ENSMUSG00000028944	-0.24239	0.040399
AA474331	ENSMUSG00000096687	-0.3988	0.041068
Etnppl	ENSMUSG00000019232	-0.5051	0.042941
Hltf	ENSMUSG00000002428	-0.36749	0.043012
Hectd2	ENSMUSG00000041180	-0.55337	0.043631
Aox1	ENSMUSG00000063558	-0.39248	0.043889
Luc7l	ENSMUSG00000024188	-0.28748	0.043952
Sbno1	ENSMUSG00000038095	-0.2513	0.043952
Heph	ENSMUSG00000031209	-0.45244	0.044032
Nim1k	ENSMUSG00000095930	-0.26636	0.044552
Ggcx	ENSMUSG00000053460	-0.374	0.044871
Agap1	ENSMUSG00000055013	-0.26919	0.045199
Clspn	ENSMUSG00000042489	-0.53626	0.045232
Pcmtd1	ENSMUSG00000051285	-0.32791	0.045232
Rin2	ENSMUSG00000001768	-0.24185	0.045232
Zfp599	ENSMUSG00000062794	-0.4801	0.045291
Ralgps2	ENSMUSG00000026594	-0.22582	0.045291
Iqcc	ENSMUSG00000040795	-0.28973	0.046385
Cbx5	ENSMUSG00000009575	-0.21747	0.046385
Sema3e	ENSMUSG00000063531	-0.42258	0.046584
Mfsd8	ENSMUSG00000025759	-0.34061	0.046673
Zfp386	ENSMUSG00000042063	-0.28609	0.046673
Dlat	ENSMUSG00000000168	-0.28839	0.046718
Atad5	ENSMUSG00000017550	-0.5116	0.047174
Rgs5	ENSMUSG00000026678	-0.21668	0.047174
Hunk	ENSMUSG00000053414	-0.30432	0.048261
Cspg4	ENSMUSG00000032911	-0.28431	0.048485
Htr1a	ENSMUSG00000021721	-0.39645	0.048771
Slx4ip	ENSMUSG00000027281	-0.39779	0.048916
Ccdc3	ENSMUSG00000026676	-0.47531	0.04894
Fn1	ENSMUSG00000026193	-0.34875	0.049755
Arid1b	ENSMUSG00000069729	-0.34432	0.05025
Polr2a	ENSMUSG00000005198	-0.23939	0.05025
Marf1	ENSMUSG00000060657	-0.19018	0.05025
Plce1	ENSMUSG00000024998	-0.4196	0.050567
Prickle2	ENSMUSG00000030020	-0.40536	0.050567
Aph1c	ENSMUSG00000053040	-0.32659	0.050567
Cpm	ENSMUSG00000020183	-0.31798	0.050567
Stk4	ENSMUSG00000018209	-0.31732	0.050567
Erc1	ENSMUSG00000030172	-0.29401	0.050567
Tmem126b	ENSMUSG00000030614	-0.23388	0.050595
Kcnq3	ENSMUSG00000056258	-0.35347	0.050841
Rnf169	ENSMUSG00000058761	-0.22182	0.050961
Zfp738	ENSMUSG00000048280	-0.39019	0.051165
Cep83	ENSMUSG00000020024	-0.32737	0.051358
Clstn2	ENSMUSG00000032452	-0.25043	0.051659
Dlx6os1	ENSMUSG00000090063	-0.36241	0.052947
Tmod2	ENSMUSG00000032186	-0.3725	0.053047
R3hdm1	ENSMUSG00000056211	-0.20686	0.053047
Fbn1	ENSMUSG00000027204	-0.48037	0.053558
2410089E03Rik	ENSMUSG00000039801	-0.31001	0.053783
Mbd5	ENSMUSG00000036792	-0.34396	0.053927
Efr3a	ENSMUSG00000015002	-0.27451	0.053927
AU041133	ENSMUSG00000078435	-0.50765	0.054021
Rab11fip1	ENSMUSG00000031488	-0.46245	0.054021
Maml3	ENSMUSG00000061143	-0.43486	0.054658
Tmcc1	ENSMUSG00000030126	-0.20326	0.054769
Arhgap20	ENSMUSG00000053199	-0.44779	0.055811
Spns2	ENSMUSG00000040447	-0.27439	0.055939
Trim9	ENSMUSG00000021071	-0.25906	0.055983
Plcl1	ENSMUSG00000038349	-0.43048	0.057489
Uggt1	ENSMUSG00000037470	-0.35315	0.057489
Fbxo10	ENSMUSG00000048232	-0.23651	0.05762
Ncald	ENSMUSG00000051359	-0.16234	0.05762
Nabp1	ENSMUSG00000026107	-0.43866	0.057731
Slitrk5	ENSMUSG00000033214	-0.31302	0.057731
Rbfox1	ENSMUSG00000008658	-0.2847	0.057941
Cwc22	ENSMUSG00000027014	-0.27071	0.057941
St8sia3	ENSMUSG00000056812	-0.24375	0.057941
Rbm28	ENSMUSG00000029701	-0.2376	0.057941
Gm14420	ENSMUSG00000078866	-0.43956	0.058487
Ndc1	ENSMUSG00000028614	-0.27565	0.058487
Ccdc127	ENSMUSG00000021578	-0.22556	0.058577
Pi4ka	ENSMUSG00000041720	-0.21717	0.059108
Tor1b	ENSMUSG00000026848	-0.1875	0.059108
Ptgs2	ENSMUSG00000032487	-0.43673	0.059591
Slc9a4	ENSMUSG00000026065	-0.41307	0.059591
Calr	ENSMUSG00000003814	-0.22995	0.059676
AI593442	ENSMUSG00000078307	-0.26912	0.060652
Vps54	ENSMUSG00000020128	-0.26321	0.060713
Narf	ENSMUSG00000000056	-0.25188	0.060713
Rgl1	ENSMUSG00000026482	-0.32502	0.060906
Cadps	ENSMUSG00000054423	-0.32322	0.061069
Sidt1	ENSMUSG00000022696	-0.22778	0.061069
Tmtc1	ENSMUSG00000030306	-0.41211	0.061184
Matn2	ENSMUSG00000022324	-0.30892	0.061184
Prss23	ENSMUSG00000039405	-0.28983	0.061184
Rab39b	ENSMUSG00000031202	-0.21339	0.061262
Gm16638	ENSMUSG00000087088	-0.5226	0.062515
Cplx2	ENSMUSG00000025867	-0.25823	0.063226
Phtf1	ENSMUSG00000058388	-0.22919	0.06325
Dgkd	ENSMUSG00000070738	-0.20891	0.06325
Zfp933	ENSMUSG00000059423	-0.27684	0.063382
Paxip1	ENSMUSG00000002221	-0.3119	0.063444
Tmem183a	ENSMUSG00000042305	-0.20194	0.063969
Epha3	ENSMUSG00000052504	-0.42205	0.064214
Gm16758	ENSMUSG00000086534	-0.4832	0.064412
Fam208a	ENSMUSG00000040651	-0.43213	0.064487
Dpf3	ENSMUSG00000021221	-0.33679	0.064487
Pdia3	ENSMUSG00000027248	-0.18398	0.064574
Tpp2	ENSMUSG00000041763	-0.32818	0.064726
Rbm33	ENSMUSG00000048271	-0.33736	0.064784
Tbl2	ENSMUSG00000005374	-0.20507	0.064972
Ptprg	ENSMUSG00000021745	-0.4248	0.065289
9230110C19Rik	ENSMUSG00000053070	-0.41531	0.065842
Lpin3	ENSMUSG00000027412	-0.46525	0.066358
Kcnh1	ENSMUSG00000058248	-0.39188	0.066358
Tbc1d5	ENSMUSG00000023923	-0.19311	0.066659
Dsel	ENSMUSG00000038702	-0.43547	0.066735
Plekha2	ENSMUSG00000031557	-0.3171	0.066735
Brd7	ENSMUSG00000031660	-0.15036	0.066735
Wnt2	ENSMUSG00000010797	-0.45488	0.066829
Myt1l	ENSMUSG00000061911	-0.41668	0.066922
Ppp1r16b	ENSMUSG00000037754	-0.29288	0.066922
Adora1	ENSMUSG00000042429	-0.36373	0.067225
Zdhhc2	ENSMUSG00000039470	-0.21484	0.067321
Arl15	ENSMUSG00000042348	-0.2587	0.067704
Dimt1	ENSMUSG00000021692	-0.2936	0.067842
Ppp1cb	ENSMUSG00000014956	-0.25237	0.069735
Sptbn2	ENSMUSG00000067889	-0.36814	0.069851
Rc3h2	ENSMUSG00000075376	-0.23933	0.070382
Zfp260	ENSMUSG00000049421	-0.31341	0.070822
Ralgapa1	ENSMUSG00000021027	-0.39687	0.071437
Rasgrp1	ENSMUSG00000027347	-0.25959	0.072182
Gpc6	ENSMUSG00000058571	-0.39049	0.072747
Lpp	ENSMUSG00000033306	-0.40229	0.072781
Slc37a3	ENSMUSG00000029924	-0.19982	0.073345
Arpc2	ENSMUSG00000006304	-0.27035	0.073586
Rufy3	ENSMUSG00000029291	-0.18993	0.074471
Tbl1xr1	ENSMUSG00000027630	-0.21099	0.075648
Cbwd1	ENSMUSG00000024878	-0.32309	0.075808
Znf512b	ENSMUSG00000000823	-0.27519	0.076489
Taok1	ENSMUSG00000017291	-0.24557	0.076517
Slc1a2	ENSMUSG00000005089	-0.20047	0.07704
Usp45	ENSMUSG00000040455	-0.38439	0.077072
Olfm4	ENSMUSG00000022026	-0.46966	0.077196
Flt4	ENSMUSG00000020357	-0.36525	0.077223
Actn1	ENSMUSG00000015143	-0.31456	0.077349
Clec16a	ENSMUSG00000068663	-0.30495	0.077349
2610507B11Rik	ENSMUSG00000010277	-0.2816	0.077349
Dhx8	ENSMUSG00000034931	-0.23707	0.077752
Rab6b	ENSMUSG00000032549	-0.19027	0.078241
Raver2	ENSMUSG00000035275	-0.29986	0.078599
Exoc4	ENSMUSG00000029763	-0.26455	0.07869
Arpc5	ENSMUSG00000008475	-0.23993	0.07869
Rapgef2	ENSMUSG00000062232	-0.31084	0.07881
Dock4	ENSMUSG00000035954	-0.45537	0.078873
Disp2	ENSMUSG00000040035	-0.24	0.078873
Camk4	ENSMUSG00000038128	-0.24269	0.078874
Neurod6	ENSMUSG00000037984	-0.25201	0.079566
Specc1	ENSMUSG00000042331	-0.24241	0.079712
Gm13861	ENSMUSG00000085382	-0.5026	0.079716
Ackr2	ENSMUSG00000044534	-0.46033	0.079749
Pde4dip	ENSMUSG00000038170	-0.3352	0.079749
Trhde	ENSMUSG00000050663	-0.38612	0.080246
Gjb6	ENSMUSG00000040055	-0.28141	0.080246
Fer1l5	ENSMUSG00000037432	-0.25731	0.08079
AI429214	ENSMUSG00000074384	-0.41577	0.081379
Cbfa2t2	ENSMUSG00000038533	-0.32908	0.081379
Zcchc7	ENSMUSG00000035649	-0.32902	0.081379
Kbtbd11	ENSMUSG00000055675	-0.24856	0.081379
Map2k4	ENSMUSG00000033352	-0.23198	0.081379
Tspan18	ENSMUSG00000027217	-0.209	0.081379
Osbp2	ENSMUSG00000020435	-0.20528	0.081379
Rnf115	ENSMUSG00000028098	-0.18499	0.081379
Dync1li1	ENSMUSG00000032435	-0.14819	0.081379
Map2	ENSMUSG00000015222	-0.3594	0.081834
Gm2420	ENSMUSG00000082305	-0.48857	0.081885
Stat2	ENSMUSG00000040033	-0.27152	0.082727
Zc3h13	ENSMUSG00000022000	-0.30945	0.083291
Nefl	ENSMUSG00000022055	-0.14848	0.083291
Apbb2	ENSMUSG00000029207	-0.2134	0.083368
4933411K20Rik	ENSMUSG00000031631	-0.27123	0.083605
Syn3	ENSMUSG00000059602	-0.42942	0.083734
Gad2	ENSMUSG00000026787	-0.31029	0.083734
Slc24a5	ENSMUSG00000035183	-0.4809	0.083995
Ust	ENSMUSG00000047712	-0.36286	0.084683
Magi2	ENSMUSG00000040003	-0.37228	0.084728
Snap29	ENSMUSG00000022765	-0.28734	0.085031
Rin1	ENSMUSG00000024883	-0.28943	0.085097
Srcap	ENSMUSG00000053877	-0.21771	0.085163
Pid1	ENSMUSG00000045658	-0.21414	0.085163
Igf2bp3	ENSMUSG00000029814	-0.48162	0.085854
Snph	ENSMUSG00000027457	-0.28122	0.085854
Chrna5	ENSMUSG00000035594	-0.33185	0.086285
Cd99l2	ENSMUSG00000035776	-0.16977	0.086631
Spry2	ENSMUSG00000022114	-0.21322	0.087307
Agtpbp1	ENSMUSG00000021557	-0.32804	0.087384
Ipp	ENSMUSG00000028696	-0.39374	0.08765
Lrp2	ENSMUSG00000027070	-0.48996	0.087735
Dync2h1	ENSMUSG00000047193	-0.37456	0.087735
Gramd1b	ENSMUSG00000040111	-0.2079	0.087735
Crebbp	ENSMUSG00000022521	-0.17141	0.087758
Ndufb2	ENSMUSG00000002416	-0.31209	0.089422
Wasl	ENSMUSG00000029684	-0.2431	0.089422
Zfand4	ENSMUSG00000042213	-0.441	0.09019
Ank3	ENSMUSG00000069601	-0.35452	0.09019
Stx3	ENSMUSG00000041488	-0.25436	0.09019
Ryr3	ENSMUSG00000057378	-0.46603	0.090247
Oxct1	ENSMUSG00000022186	-0.12921	0.091355
Map3k5	ENSMUSG00000071369	-0.32364	0.091443
Synj2bp	ENSMUSG00000090935	-0.2747	0.091443
Lgalsl	ENSMUSG00000042363	-0.20239	0.091585
Rab14	ENSMUSG00000026878	-0.1934	0.091585
Zfp804a	ENSMUSG00000070866	-0.35109	0.092106
Zfp958	ENSMUSG00000058748	-0.3332	0.092217
Reln	ENSMUSG00000042453	-0.28396	0.092217
Wdr59	ENSMUSG00000031959	-0.28231	0.092217
Tank	ENSMUSG00000064289	-0.23993	0.092217
Gmeb1	ENSMUSG00000028901	-0.21091	0.092217
Mdga1	ENSMUSG00000043557	-0.31021	0.09234
Zbtb44	ENSMUSG00000047412	-0.26962	0.09234
Erc2	ENSMUSG00000040640	-0.40576	0.092348
Tenm4	ENSMUSG00000048078	-0.23386	0.092348
Ehd3	ENSMUSG00000024065	-0.2175	0.092348
Ubxn2b	ENSMUSG00000028243	-0.37548	0.092404
Gpr173	ENSMUSG00000056679	-0.26097	0.093449
Ikzf2	ENSMUSG00000025997	-0.42233	0.093983
Tacc1	ENSMUSG00000065954	-0.18984	0.094017
Nfib	ENSMUSG00000008575	-0.22402	0.094232
Slc4a7	ENSMUSG00000021733	-0.38469	0.094754
Elovl4	ENSMUSG00000032262	-0.18108	0.095031
Sptan1	ENSMUSG00000057738	-0.24008	0.095045
Smc1a	ENSMUSG00000041133	-0.18028	0.095045
Obscn	ENSMUSG00000061462	-0.3479	0.09567
Kcnj6	ENSMUSG00000043301	-0.45602	0.095829
Htt	ENSMUSG00000029104	-0.33795	0.095829
Slc24a4	ENSMUSG00000041771	-0.36284	0.095832
Gm26676	ENSMUSG00000097593	-0.4827	0.096015
Krt83	ENSMUSG00000047641	-0.46981	0.096015
Pik3cb	ENSMUSG00000032462	-0.3051	0.096015
Dscaml1	ENSMUSG00000032087	-0.29007	0.096015
Fbxw7	ENSMUSG00000028086	-0.25769	0.096015
Mapk10	ENSMUSG00000046709	-0.16579	0.09613
Cml3	ENSMUSG00000051262	-0.46656	0.096184
Stab2	ENSMUSG00000035459	-0.39687	0.096457
Herc2	ENSMUSG00000030451	-0.36516	0.096457
Bmpr2	ENSMUSG00000067336	-0.24351	0.096537
Slitrk4	ENSMUSG00000046699	-0.38928	0.096839
Mlec	ENSMUSG00000048578	-0.26439	0.097146
Dock11	ENSMUSG00000031093	-0.34205	0.097323
Insr	ENSMUSG00000005534	-0.33953	0.097323
Gtf3c3	ENSMUSG00000041303	-0.27136	0.097323
Kdm4a	ENSMUSG00000033326	-0.23327	0.097323
Pik3cd	ENSMUSG00000039936	-0.23854	0.097332
Gm13091	ENSMUSG00000085213	-0.47758	0.09756
Nebl	ENSMUSG00000053702	-0.3879	0.09756
Osbpl6	ENSMUSG00000042359	-0.3442	0.09756
Nxpe3	ENSMUSG00000075033	-0.31326	0.09756
Bdnf	ENSMUSG00000048482	-0.24695	0.09756
Cdc40	ENSMUSG00000038446	-0.3082	0.098041
Iigp1	ENSMUSG00000054072	-0.48026	0.098836
Kpna1	ENSMUSG00000022905	-0.27062	0.099718
Pot1b	ENSMUSG00000024174	-0.35957	0.099828
Rab11fip3	ENSMUSG00000037098	-0.29158	0.099884
Prpf8	ENSMUSG00000020850	-0.2291	0.10009
Ankrd50	ENSMUSG00000044864	-0.26727	0.10102
Krt75	ENSMUSG00000022986	-0.46301	0.10134
Hpgd	ENSMUSG00000031613	-0.32499	0.10134
Dlg3	ENSMUSG00000000881	-0.27929	0.1024
Nktr	ENSMUSG00000032525	-0.3662	0.10358
Gcfc2	ENSMUSG00000035125	-0.4243	0.10369
Tex10	ENSMUSG00000028345	-0.31091	0.10424
Sgk3	ENSMUSG00000025915	-0.44598	0.10433
Zbtb16	ENSMUSG00000066687	-0.46844	0.10453
Paqr9	ENSMUSG00000064225	-0.20324	0.10458
Slco3a1	ENSMUSG00000025790	-0.22619	0.10516
G3bp2	ENSMUSG00000029405	-0.18774	0.10544
Rnf19a	ENSMUSG00000022280	-0.2679	0.10553
Nceh1	ENSMUSG00000027698	-0.20874	0.10553
Arhgef7	ENSMUSG00000031511	-0.13307	0.10553
Parva	ENSMUSG00000030770	-0.19734	0.10555
Sass6	ENSMUSG00000027959	-0.3518	0.10593
Thpo	ENSMUSG00000022847	-0.41584	0.10655
B3galt5	ENSMUSG00000074892	-0.26743	0.10655
Strbp	ENSMUSG00000026915	-0.22913	0.10655
Ogdh	ENSMUSG00000020456	-0.17971	0.10655
Dock9	ENSMUSG00000025558	-0.38273	0.10706
Vps13d	ENSMUSG00000020220	-0.33719	0.10706
Fancd2	ENSMUSG00000034023	-0.38227	0.10708
Pde5a	ENSMUSG00000053965	-0.32033	0.10767
Apbb1ip	ENSMUSG00000026786	-0.29983	0.10767
Tug1	ENSMUSG00000056579	-0.19215	0.10767
Il1rap	ENSMUSG00000022514	-0.26525	0.1079
Cnr1	ENSMUSG00000044288	-0.34981	0.10806
Podxl	ENSMUSG00000025608	-0.26193	0.10809
Inf2	ENSMUSG00000037679	-0.38473	0.10811
Degs2	ENSMUSG00000021263	-0.33461	0.10811
Mtor	ENSMUSG00000028991	-0.28647	0.10811
Reps2	ENSMUSG00000040855	-0.33701	0.10816
Mllt3	ENSMUSG00000028496	-0.28883	0.10855
5830416P10Rik	ENSMUSG00000097636	-0.41659	0.10861
Cacng2	ENSMUSG00000019146	-0.27064	0.10881
Srgap2	ENSMUSG00000026425	-0.22641	0.10936
Sacs	ENSMUSG00000048279	-0.36764	0.10987
Gm20603	ENSMUSG00000097432	-0.42841	0.11046
Large	ENSMUSG00000004383	-0.27233	0.11046
Tnxb	ENSMUSG00000033327	-0.26478	0.11046
Abi2	ENSMUSG00000026782	-0.24218	0.11046
Ntrk2	ENSMUSG00000055254	-0.1891	0.11046
Nmt1	ENSMUSG00000020936	-0.16088	0.11046
Scn8a	ENSMUSG00000023033	-0.28541	0.11111
Zfp526	ENSMUSG00000046541	-0.37841	0.11117
Amer3	ENSMUSG00000045174	-0.25887	0.11117
Nwd1	ENSMUSG00000048148	-0.45614	0.11177
Fam83d	ENSMUSG00000027654	-0.39678	0.11184
Tlr13	ENSMUSG00000033777	-0.38354	0.11222
Chst11	ENSMUSG00000034612	-0.2981	0.11222
Rap2b	ENSMUSG00000036894	-0.20569	0.11222
Lrrc61	ENSMUSG00000073096	-0.18541	0.11222
Dot1l	ENSMUSG00000061589	-0.30909	0.11233
Fam206a	ENSMUSG00000038827	-0.22188	0.11258
Lifr	ENSMUSG00000054263	-0.24796	0.11352
9630033F20Rik	ENSMUSG00000038028	-0.18463	0.1136
Flna	ENSMUSG00000031328	-0.20895	0.11361
Slc17a8	ENSMUSG00000019935	-0.371	0.11386
Stard8	ENSMUSG00000031216	-0.29312	0.11422
Pias2	ENSMUSG00000025423	-0.24403	0.11422
Zfp106	ENSMUSG00000027288	-0.23681	0.11422
Pdhx	ENSMUSG00000010914	-0.17804	0.11425
Rock2	ENSMUSG00000020580	-0.26746	0.11439
Usp48	ENSMUSG00000043411	-0.2027	0.11478
Card6	ENSMUSG00000041849	-0.36005	0.11521
Pappa2	ENSMUSG00000073530	-0.46488	0.11551
Mum1l1	ENSMUSG00000042515	-0.42535	0.11598
Thsd4	ENSMUSG00000032289	-0.3532	0.11598
Kdm7a	ENSMUSG00000042599	-0.3502	0.11598
F13a1	ENSMUSG00000039109	-0.46389	0.11623
Prr14l	ENSMUSG00000054280	-0.28843	0.11623
Sel1l	ENSMUSG00000020964	-0.31915	0.11654
Glis3	ENSMUSG00000052942	-0.44126	0.11662
Skida1	ENSMUSG00000054074	-0.22209	0.11696
Htr2a	ENSMUSG00000034997	-0.44806	0.11733
St6galnac2	ENSMUSG00000057286	-0.35641	0.11735
Sptb	ENSMUSG00000021061	-0.31136	0.11735
Phyhd1	ENSMUSG00000079484	-0.46027	0.11737
Cpsf4l	ENSMUSG00000018727	-0.43575	0.11737
Slc35f3	ENSMUSG00000057060	-0.29664	0.1177
Gucy1b2	ENSMUSG00000021933	-0.46019	0.11775
Camsap2	ENSMUSG00000041570	-0.32051	0.11848
Nkap	ENSMUSG00000016409	-0.2704	0.11848
6430548M08Rik	ENSMUSG00000031824	-0.21869	0.11848
Tmem68	ENSMUSG00000028232	-0.23852	0.11873
Npepps	ENSMUSG00000001441	-0.20401	0.11908
Hspa4	ENSMUSG00000020361	-0.21939	0.11911
C130071C03Rik	ENSMUSG00000050334	-0.33406	0.11918
Nudt5	ENSMUSG00000025817	-0.2414	0.11933
Gria1	ENSMUSG00000020524	-0.27019	0.11937
Rint1	ENSMUSG00000028999	-0.23762	0.11937
Fbxo18	ENSMUSG00000058594	-0.21986	0.11945
Thrb	ENSMUSG00000021779	-0.21824	0.11945
Gabrr2	ENSMUSG00000023267	-0.4346	0.11963
Npr3	ENSMUSG00000022206	-0.4023	0.11963
Thnsl1	ENSMUSG00000048550	-0.27276	0.11963
Tmem150c	ENSMUSG00000050640	-0.20252	0.1198
Zfp715	ENSMUSG00000012640	-0.36845	0.12007
Spcs3	ENSMUSG00000054408	-0.18063	0.12013
1700020I14Rik	ENSMUSG00000085438	-0.30283	0.12051
Tln2	ENSMUSG00000052698	-0.25519	0.12102
3110035E14Rik	ENSMUSG00000067879	-0.24734	0.12102
Dapk1	ENSMUSG00000021559	-0.30299	0.12114
Slc25a46	ENSMUSG00000024259	-0.13598	0.12114
Zfp93	ENSMUSG00000055305	-0.24132	0.12151
Ipo11	ENSMUSG00000042590	-0.23007	0.12195
Cap1	ENSMUSG00000028656	-0.16888	0.12245
Prkce	ENSMUSG00000045038	-0.33538	0.12268
Tspyl5	ENSMUSG00000038984	-0.27873	0.12268
Nmt2	ENSMUSG00000026643	-0.19687	0.12296
Rhot1	ENSMUSG00000017686	-0.18304	0.12301
Prdm11	ENSMUSG00000075028	-0.29229	0.12365
Zbtb18	ENSMUSG00000063659	-0.28098	0.12379
Paip2b	ENSMUSG00000045896	-0.18662	0.1238
D630039A03Rik	ENSMUSG00000052117	-0.44191	0.12399
Zfp125	ENSMUSG00000069755	-0.45484	0.12405
Smchd1	ENSMUSG00000024054	-0.36996	0.12405
Cdk14	ENSMUSG00000028926	-0.30329	0.12405
Txlng	ENSMUSG00000038344	-0.30212	0.12405
Esrrb	ENSMUSG00000021255	-0.37532	0.12502
Sez6l	ENSMUSG00000058153	-0.27951	0.12502
Kifap3	ENSMUSG00000026585	-0.16899	0.1251
Pibf1	ENSMUSG00000022064	-0.26804	0.12523
Acvr2a	ENSMUSG00000052155	-0.4015	0.12543
Arl6ip1	ENSMUSG00000030654	-0.21395	0.12553
Extl2	ENSMUSG00000027963	-0.17756	0.12555
Kcnab1	ENSMUSG00000027827	-0.22582	0.12558
Pcdh20	ENSMUSG00000050505	-0.36062	0.12584
Zbed6	ENSMUSG00000094410	-0.33058	0.12634
Pde4c	ENSMUSG00000031842	-0.45395	0.12671
Mcph1	ENSMUSG00000039842	-0.27596	0.12671
Lipa	ENSMUSG00000024781	-0.2502	0.12702
Pafah2	ENSMUSG00000037366	-0.31784	0.12704
Fam19a1	ENSMUSG00000059187	-0.22654	0.12711
Rbm6	ENSMUSG00000032582	-0.23829	0.1284
Bbs1	ENSMUSG00000006464	-0.22386	0.1284
Entpd1	ENSMUSG00000048120	-0.21701	0.1284
Aff3	ENSMUSG00000037138	-0.28852	0.12876
Sh3rf3	ENSMUSG00000037990	-0.34875	0.12879
Snx25	ENSMUSG00000038291	-0.25456	0.12879
Mecp2	ENSMUSG00000031393	-0.25003	0.12927
Opa1	ENSMUSG00000038084	-0.2657	0.12955
Mex3b	ENSMUSG00000057706	-0.329	0.12965
Nrip3	ENSMUSG00000034825	-0.20183	0.13052
Chst15	ENSMUSG00000030930	-0.2444	0.13083
Mprip	ENSMUSG00000005417	-0.22179	0.13083
Zmat3	ENSMUSG00000027663	-0.16358	0.13083
Mtif2	ENSMUSG00000020459	-0.2506	0.13156
Perp	ENSMUSG00000019851	-0.39931	0.1316
Lrpprc	ENSMUSG00000024120	-0.20357	0.13176
2010002M12Rik	ENSMUSG00000067297	-0.44952	0.13184
Gm5113	ENSMUSG00000066647	-0.43268	0.13184
Tmem132b	ENSMUSG00000070498	-0.34067	0.13184
Ehbp1	ENSMUSG00000042302	-0.26749	0.13184
Ubqln1	ENSMUSG00000005312	-0.14973	0.13184
Spag5	ENSMUSG00000002055	-0.32489	0.13211
Kl	ENSMUSG00000058488	-0.42855	0.13311
Pdgfd	ENSMUSG00000032006	-0.42034	0.13315
4833422C13Rik	ENSMUSG00000074782	-0.32745	0.13315
Lonrf2	ENSMUSG00000048814	-0.19473	0.13315
Frrs1l	ENSMUSG00000045589	-0.27646	0.13322
Ap1s3	ENSMUSG00000054702	-0.419	0.13327
9830147E19Rik	ENSMUSG00000074158	-0.40324	0.13327
Jazf1	ENSMUSG00000063568	-0.34046	0.13376
Gm14290	ENSMUSG00000086605	-0.31973	0.1338
Tacc2	ENSMUSG00000030852	-0.22039	0.13408
Smox	ENSMUSG00000027333	-0.33784	0.13415
Oxsm	ENSMUSG00000021786	-0.33312	0.13421
Dscam	ENSMUSG00000050272	-0.2932	0.1346
Polr3a	ENSMUSG00000025280	-0.20824	0.13461
Trpc4	ENSMUSG00000027748	-0.28801	0.13471
Prkab2	ENSMUSG00000038205	-0.29317	0.13496
Abce1	ENSMUSG00000058355	-0.22377	0.13543
Slc9a2	ENSMUSG00000026062	-0.32071	0.1356
Clasp1	ENSMUSG00000064302	-0.20389	0.1356
Cstf2t	ENSMUSG00000053536	-0.20367	0.13661
Syde2	ENSMUSG00000036863	-0.38926	0.13683
Maml2	ENSMUSG00000031925	-0.32392	0.13683
Pex1	ENSMUSG00000005907	-0.26731	0.13683
Alox12b	ENSMUSG00000032807	-0.36586	0.13739
Gabpa	ENSMUSG00000008976	-0.27043	0.13739
Vti1a	ENSMUSG00000024983	-0.16888	0.13739
Iyd	ENSMUSG00000019762	-0.30846	0.13794
Olfml2b	ENSMUSG00000038463	-0.27325	0.13794
Tia1	ENSMUSG00000071337	-0.3514	0.13802
Heatr1	ENSMUSG00000050244	-0.22832	0.13817
Ptchd2	ENSMUSG00000041544	-0.21813	0.13817
Crbn	ENSMUSG00000005362	-0.2582	0.13955
Med14	ENSMUSG00000064127	-0.2378	0.13955
Ric3	ENSMUSG00000048330	-0.21491	0.13955
Usp25	ENSMUSG00000022867	-0.33725	0.14004
Lonrf3	ENSMUSG00000016239	-0.44174	0.14024
A330008L17Rik	ENSMUSG00000052479	-0.3238	0.14024
Zfp518a	ENSMUSG00000049164	-0.37161	0.14073
Add2	ENSMUSG00000030000	-0.44172	0.14087
6030458C11Rik	ENSMUSG00000022195	-0.23675	0.14087
Sprn	ENSMUSG00000045733	-0.18747	0.14087
Pxdn	ENSMUSG00000020674	-0.32593	0.14104
Ccdc73	ENSMUSG00000045106	-0.29743	0.14104
Syne1	ENSMUSG00000096054	-0.24547	0.14104
Gm13856	ENSMUSG00000087356	-0.43886	0.14165
Gen1	ENSMUSG00000051235	-0.43211	0.14165
Usp32	ENSMUSG00000000804	-0.32422	0.14165
Mtmr1	ENSMUSG00000015214	-0.31642	0.14165
Abcb1a	ENSMUSG00000040584	-0.30686	0.14165
Mon2	ENSMUSG00000034602	-0.27978	0.14165
Rere	ENSMUSG00000039852	-0.24749	0.14165
Wdfy3	ENSMUSG00000043940	-0.3678	0.14192
Nsd1	ENSMUSG00000021488	-0.2796	0.14202
Pwwp2a	ENSMUSG00000044950	-0.28117	0.14302
Rab27b	ENSMUSG00000024511	-0.29314	0.14399
2210408F21Rik	ENSMUSG00000087380	-0.27909	0.14423
Trip11	ENSMUSG00000021188	-0.34776	0.14467
Synj1	ENSMUSG00000022973	-0.32752	0.14511
Dbt	ENSMUSG00000000340	-0.34197	0.14531
Lyst	ENSMUSG00000019726	-0.42746	0.14541
Dnajc21	ENSMUSG00000044224	-0.20922	0.14541
Yipf5	ENSMUSG00000024487	-0.13303	0.14541
Plek	ENSMUSG00000020120	-0.28781	0.14598
Trit1	ENSMUSG00000028653	-0.22495	0.14598
Hsp90aa1	ENSMUSG00000021270	-0.22225	0.14661
Twf1	ENSMUSG00000022451	-0.15467	0.14666
Fastkd1	ENSMUSG00000027086	-0.2773	0.14681
Usp50	ENSMUSG00000027364	-0.435	0.14699
Slco1c1	ENSMUSG00000030235	-0.21355	0.14699
Rfx3	ENSMUSG00000040929	-0.34853	0.14703
Nkain3	ENSMUSG00000055761	-0.3365	0.14763
L3mbtl3	ENSMUSG00000039089	-0.26615	0.14786
Clec2d	ENSMUSG00000030157	-0.36687	0.14801
Zfp946	ENSMUSG00000071266	-0.32686	0.14801
Slc17a5	ENSMUSG00000049624	-0.23949	0.14855
Bag4	ENSMUSG00000037316	-0.25269	0.14861
A330023F24Rik	ENSMUSG00000096929	-0.39906	0.14864
Acaca	ENSMUSG00000020532	-0.19626	0.14865
5430403G16Rik	ENSMUSG00000072763	-0.43601	0.14874
Grin2a	ENSMUSG00000059003	-0.43538	0.14874
Tet3	ENSMUSG00000034832	-0.34306	0.14874
Ptprf	ENSMUSG00000033295	-0.26501	0.1488
Wnk2	ENSMUSG00000037989	-0.24554	0.1488
Tro	ENSMUSG00000025272	-0.18912	0.1488
Arnt	ENSMUSG00000015522	-0.30087	0.14923
Dab1	ENSMUSG00000028519	-0.18808	0.14923
Grin2b	ENSMUSG00000030209	-0.32074	0.14939
Adcy1	ENSMUSG00000020431	-0.37315	0.14963
Pde10a	ENSMUSG00000023868	-0.34743	0.14963
Zfp809	ENSMUSG00000057982	-0.2922	0.14963
Ccdc18	ENSMUSG00000056531	-0.43435	0.14976
Gm14122	ENSMUSG00000083964	-0.429	0.14992
Xpnpep3	ENSMUSG00000022401	-0.39988	0.14992
Amigo2	ENSMUSG00000048218	-0.24499	0.14992
Mxd4	ENSMUSG00000037235	-0.21773	0.14992
Npbwr1	ENSMUSG00000033774	-0.40335	0.15017
Gm28043	ENSMUSG00000098374	-0.36917	0.15029
Rab15	ENSMUSG00000021062	-0.21294	0.15029
Dgcr8	ENSMUSG00000022718	-0.38061	0.15042
Focad	ENSMUSG00000038368	-0.35787	0.15097
Snrnp200	ENSMUSG00000003660	-0.20519	0.15097
Vps39	ENSMUSG00000027291	-0.17366	0.15097
Capn2	ENSMUSG00000026509	-0.16271	0.15097
Zfp626	ENSMUSG00000030604	-0.41869	0.15125
Kcnv1	ENSMUSG00000022342	-0.30703	0.15169
Gprin3	ENSMUSG00000045441	-0.42929	0.15243
Ahr	ENSMUSG00000019256	-0.37364	0.15243
C030046E11Rik	ENSMUSG00000038658	-0.3602	0.15246
Gm20939	ENSMUSG00000095193	-0.42839	0.15252
Unc13a	ENSMUSG00000034799	-0.2445	0.15289
H2-T24	ENSMUSG00000053835	-0.40917	0.15304
Akt3	ENSMUSG00000019699	-0.29914	0.15304
Top3a	ENSMUSG00000002814	-0.27118	0.15304
Foxred2	ENSMUSG00000016552	-0.23678	0.15304
Htr5a	ENSMUSG00000039106	-0.32433	0.15371
Ncoa1	ENSMUSG00000020647	-0.28663	0.15371
Scn2b	ENSMUSG00000070304	-0.22672	0.15371
Zbtb38	ENSMUSG00000040433	-0.2636	0.15374
Inpp5e	ENSMUSG00000026925	-0.22459	0.15376
Dclre1c	ENSMUSG00000026648	-0.38417	0.15381
Ppp3cb	ENSMUSG00000021816	-0.19727	0.15381
Tvp23a	ENSMUSG00000050908	-0.32633	0.15493
Cyfip2	ENSMUSG00000020340	-0.26416	0.15493
Oprd1	ENSMUSG00000050511	-0.42927	0.15516
Zfp11	ENSMUSG00000051034	-0.29974	0.15516
Bclaf1	ENSMUSG00000037608	-0.3046	0.156
Kpna6	ENSMUSG00000003731	-0.24087	0.15606
Syt14	ENSMUSG00000016200	-0.42834	0.15639
Abcc4	ENSMUSG00000032849	-0.21889	0.15639
Ttll5	ENSMUSG00000012609	-0.17639	0.15658
Tiam2	ENSMUSG00000023800	-0.1943	0.15664
Lman2l	ENSMUSG00000001143	-0.21002	0.15688
Kcnc3	ENSMUSG00000062785	-0.23287	0.15699
Cdr1	ENSMUSG00000090546	-0.40293	0.15728
Scube1	ENSMUSG00000016763	-0.37695	0.15734
Mef2a	ENSMUSG00000030557	-0.31069	0.15734
Gad1	ENSMUSG00000070880	-0.22682	0.15734
Creg2	ENSMUSG00000050967	-0.22182	0.15734
Prpf18	ENSMUSG00000039449	-0.17814	0.15735
Hcrtr2	ENSMUSG00000032360	-0.3989	0.15751
Map4k3	ENSMUSG00000024242	-0.31467	0.15751
Tmtc4	ENSMUSG00000041594	-0.30021	0.15751
Anapc1	ENSMUSG00000014355	-0.25323	0.15751
Mau2	ENSMUSG00000031858	-0.18448	0.15751
Cnot2	ENSMUSG00000020166	-0.16231	0.15751
Pikfyve	ENSMUSG00000025949	-0.27428	0.15769
Prdm15	ENSMUSG00000014039	-0.35655	0.15779
Aqr	ENSMUSG00000040383	-0.21954	0.15791
Chd8	ENSMUSG00000053754	-0.21841	0.15791
Mcf2l	ENSMUSG00000031442	-0.1434	0.15791
Sbf2	ENSMUSG00000038371	-0.29992	0.15797
Dsn1	ENSMUSG00000027635	-0.35203	0.15825
Cers6	ENSMUSG00000027035	-0.24682	0.15832
Flrt2	ENSMUSG00000047414	-0.33362	0.15844
Ubn2	ENSMUSG00000038538	-0.2712	0.15844
Pip5k1b	ENSMUSG00000024867	-0.23617	0.15844
N28178	ENSMUSG00000036062	-0.21713	0.15844
Zfp951	ENSMUSG00000072774	-0.42703	0.15876
Plk-ps1	ENSMUSG00000083907	-0.42581	0.15876
Flrt3	ENSMUSG00000051379	-0.31508	0.15876
Acer2	ENSMUSG00000038007	-0.33942	0.15887
Baz1b	ENSMUSG00000002748	-0.21468	0.15985
Fam78b	ENSMUSG00000060568	-0.21721	0.1599
Vps13b	ENSMUSG00000037646	-0.34575	0.16027
Npy2r	ENSMUSG00000028004	-0.36048	0.16033
Ercc5	ENSMUSG00000026048	-0.20913	0.16066
B3galt1	ENSMUSG00000034780	-0.24621	0.16084
Sdk2	ENSMUSG00000041592	-0.33851	0.16172
Stard5	ENSMUSG00000046027	-0.27471	0.16172
Hyou1	ENSMUSG00000032115	-0.16283	0.16184
Tcam1	ENSMUSG00000020712	-0.42016	0.16244
Rab3gap1	ENSMUSG00000036104	-0.23257	0.16244
Tns4	ENSMUSG00000017607	-0.35708	0.1626
Gm20457	ENSMUSG00000092187	-0.38431	0.16283
Plcg2	ENSMUSG00000034330	-0.23909	0.16283
Zfp85os	ENSMUSG00000044081	-0.33525	0.16292
Slu7	ENSMUSG00000020409	-0.17554	0.16292
Ptpru	ENSMUSG00000028909	-0.29317	0.1633
Camk2a	ENSMUSG00000024617	-0.24029	0.16406
Rabgap1	ENSMUSG00000035437	-0.2034	0.16423
Dnajc5	ENSMUSG00000000826	-0.18814	0.1645
Ube2t	ENSMUSG00000026429	-0.413	0.16459
Pln	ENSMUSG00000038583	-0.41042	0.16459
Zfp831	ENSMUSG00000050600	-0.32682	0.16459
Ubr1	ENSMUSG00000027272	-0.32595	0.16459
Star	ENSMUSG00000031574	-0.26105	0.16459
Rrn3	ENSMUSG00000022682	-0.14154	0.16459
Csnk1a1	ENSMUSG00000024576	-0.25724	0.16508
Fnip1	ENSMUSG00000035992	-0.33051	0.16519
4933431E20Rik	ENSMUSG00000086968	-0.18597	0.16522
Aak1	ENSMUSG00000057230	-0.28732	0.1656
Sulf2	ENSMUSG00000006800	-0.25269	0.1656
Rreb1	ENSMUSG00000039087	-0.40892	0.16575
Slc37a2	ENSMUSG00000032122	-0.39635	0.16639
Ivns1abp	ENSMUSG00000023150	-0.18449	0.16681
Fgf16	ENSMUSG00000031230	-0.35177	0.16757
Fam188a	ENSMUSG00000026767	-0.23263	0.16757
Eme2	ENSMUSG00000073436	-0.31117	0.16763
Fam98b	ENSMUSG00000027349	-0.1556	0.16764
Slc1a5	ENSMUSG00000001918	-0.3801	0.16766
Ncbp1	ENSMUSG00000028330	-0.19061	0.16766
Fryl	ENSMUSG00000070733	-0.32227	0.16796
Ttc37	ENSMUSG00000033991	-0.4028	0.16843
Mib1	ENSMUSG00000024294	-0.27687	0.16843
Zhx1	ENSMUSG00000022361	-0.24132	0.16843
Sipa1l2	ENSMUSG00000001995	-0.23046	0.16843
Krr1	ENSMUSG00000063334	-0.26828	0.16874
Ptpra	ENSMUSG00000027303	-0.2628	0.16874
Tspyl3	ENSMUSG00000074671	-0.19702	0.16874
Ppp6r3	ENSMUSG00000024908	-0.16384	0.16874
Sik3	ENSMUSG00000034135	-0.15982	0.16874
Zfp772	ENSMUSG00000066838	-0.25479	0.16908
Neb	ENSMUSG00000026950	-0.41432	0.16947
Marveld2	ENSMUSG00000021636	-0.40237	0.16947
Itpr1	ENSMUSG00000030102	-0.35795	0.16947
Traf3ip2	ENSMUSG00000019842	-0.33441	0.16947
Dopey1	ENSMUSG00000034973	-0.31985	0.16947
Scyl3	ENSMUSG00000026584	-0.31474	0.16947
Wdr7	ENSMUSG00000040560	-0.30833	0.16947
Npy5r	ENSMUSG00000044014	-0.30244	0.16947
Lmtk2	ENSMUSG00000038970	-0.24622	0.16947
Epb4.1l1	ENSMUSG00000027624	-0.24043	0.16947
Rbbp5	ENSMUSG00000026439	-0.23431	0.16947
Traf3	ENSMUSG00000021277	-0.22602	0.16947
Lypd1	ENSMUSG00000026344	-0.22209	0.16947
Eif4g1	ENSMUSG00000045983	-0.21862	0.16947
Tbc1d14	ENSMUSG00000029192	-0.18939	0.16947
Acox1	ENSMUSG00000020777	-0.1842	0.16947
Fem1b	ENSMUSG00000032244	-0.17971	0.16947
Fstl4	ENSMUSG00000036264	-0.40119	0.16953
Rfwd2	ENSMUSG00000040782	-0.18448	0.16953
Top1	ENSMUSG00000070544	-0.23769	0.16954
Plxna2	ENSMUSG00000026640	-0.30501	0.16998
Kdm4b	ENSMUSG00000024201	-0.26569	0.17001
Adamts20	ENSMUSG00000022449	-0.35194	0.17029
Gga3	ENSMUSG00000020740	-0.20762	0.17029
Srsf10	ENSMUSG00000028676	-0.22381	0.17105
Zfp866	ENSMUSG00000043090	-0.24757	0.17142
Tmem170b	ENSMUSG00000087370	-0.18085	0.17173
Rabgap1l	ENSMUSG00000026721	-0.23467	0.17203
Rprd1a	ENSMUSG00000040446	-0.3374	0.17224
Kmt2d	ENSMUSG00000048154	-0.31024	0.17224
Fam214a	ENSMUSG00000034858	-0.30651	0.17263
Slc29a3	ENSMUSG00000020100	-0.25592	0.17263
Slitrk3	ENSMUSG00000048304	-0.37427	0.17264
Zbtb1	ENSMUSG00000033454	-0.26966	0.17265
Sertm1	ENSMUSG00000056306	-0.21681	0.17274
Ywhab	ENSMUSG00000018326	-0.13742	0.17317
1810012K08Rik	ENSMUSG00000087595	-0.41163	0.17343
Zyg11b	ENSMUSG00000034636	-0.33973	0.17357
Pacsin2	ENSMUSG00000016664	-0.17643	0.17357
Rabep1	ENSMUSG00000020817	-0.18711	0.1737
Ralgapb	ENSMUSG00000027652	-0.27023	0.17418
Zzef1	ENSMUSG00000055670	-0.29415	0.17467
Srr	ENSMUSG00000001323	-0.26664	0.17467
Zfp532	ENSMUSG00000042439	-0.25733	0.17467
Srek1	ENSMUSG00000032621	-0.3107	0.17478
Tbc1d1	ENSMUSG00000029174	-0.29716	0.17488
Sfmbt1	ENSMUSG00000006527	-0.22081	0.17488
Trabd2b	ENSMUSG00000070867	-0.3375	0.17508
Akap13	ENSMUSG00000066406	-0.35807	0.17557
Dzip1l	ENSMUSG00000037784	-0.25194	0.17578
Ercc6	ENSMUSG00000054051	-0.34047	0.17639
Astn1	ENSMUSG00000026587	-0.28509	0.17686
Jakmip2	ENSMUSG00000024502	-0.28216	0.17686
Ankrd29	ENSMUSG00000057766	-0.24937	0.17686
Gm11827	ENSMUSG00000086765	-0.38706	0.17711
Dlgap1	ENSMUSG00000003279	-0.30498	0.1774
A630007B06Rik	ENSMUSG00000035173	-0.26742	0.17759
Btbd3	ENSMUSG00000062098	-0.30687	0.17797
Sipa1l3	ENSMUSG00000030583	-0.25498	0.17797
Ubap2l	ENSMUSG00000042520	-0.15099	0.17797
Mcm9	ENSMUSG00000058298	-0.30827	0.17799
Cacna1b	ENSMUSG00000004113	-0.28657	0.17897
Flt3	ENSMUSG00000042817	-0.24415	0.17897
Hivep2	ENSMUSG00000015501	-0.29753	0.17931
Bri3bp	ENSMUSG00000037905	-0.13144	0.17931
Eml6	ENSMUSG00000044072	-0.40438	0.17977
5830417I10Rik	ENSMUSG00000078684	-0.3117	0.17977
Birc6	ENSMUSG00000024073	-0.28982	0.17977
Msh3	ENSMUSG00000014850	-0.19701	0.17977
Atp1a2	ENSMUSG00000007097	-0.1768	0.17977
Ccdc43	ENSMUSG00000020925	-0.20626	0.18005
Nup155	ENSMUSG00000022142	-0.316	0.18032
Asxl1	ENSMUSG00000042548	-0.25276	0.18034
Psmc6	ENSMUSG00000021832	-0.19099	0.18043
Rnf150	ENSMUSG00000047747	-0.32909	0.18051
Krit1	ENSMUSG00000000600	-0.25618	0.18051
Atxn7l3b	ENSMUSG00000074748	-0.19646	0.18051
Phactr1	ENSMUSG00000054728	-0.22819	0.18097
Ltn1	ENSMUSG00000052299	-0.28768	0.18145
Sort1	ENSMUSG00000068747	-0.21098	0.18164
Scin	ENSMUSG00000002565	-0.3913	0.18182
Abl2	ENSMUSG00000026596	-0.28152	0.18182
Mamld1	ENSMUSG00000059401	-0.24017	0.18212
Vcpip1	ENSMUSG00000045210	-0.26131	0.18248
Gigyf2	ENSMUSG00000048000	-0.30369	0.18295
Tnks2	ENSMUSG00000024811	-0.22638	0.18307
Zfp799	ENSMUSG00000095253	-0.25009	0.18309
Gm9899	ENSMUSG00000053214	-0.37415	0.18318
Fry	ENSMUSG00000056602	-0.26496	0.18318
Vip	ENSMUSG00000019772	-0.26013	0.18318
Dip2b	ENSMUSG00000023026	-0.1316	0.18318
Malat1	ENSMUSG00000092341	-0.30466	0.18325
Sertad2	ENSMUSG00000049800	-0.25133	0.18325
Zscan26	ENSMUSG00000022228	-0.17975	0.18388
Dmp1	ENSMUSG00000029307	-0.27994	0.18455
Rimbp3	ENSMUSG00000071636	-0.3201	0.18517
Trp53inp2	ENSMUSG00000038375	-0.22429	0.18517
Dopey2	ENSMUSG00000022946	-0.20237	0.18546
Ints10	ENSMUSG00000031864	-0.20286	0.1855
Onecut2	ENSMUSG00000045991	-0.39327	0.18629
Ikbkap	ENSMUSG00000028431	-0.17874	0.18635
Erich1	ENSMUSG00000051978	-0.27242	0.18655
Yipf6	ENSMUSG00000047694	-0.26653	0.18744
Gm2115	ENSMUSG00000097789	-0.35053	0.18793
Plcb1	ENSMUSG00000051177	-0.29556	0.18797
Rnf128	ENSMUSG00000031438	-0.25625	0.18799
Paqr5	ENSMUSG00000032278	-0.36187	0.18803
Nmnat1	ENSMUSG00000028992	-0.30593	0.18809
Dkc1	ENSMUSG00000031403	-0.30475	0.18809
Tigd2	ENSMUSG00000049232	-0.21492	0.18811
Acvr1b	ENSMUSG00000000532	-0.19332	0.18885
Mki67	ENSMUSG00000031004	-0.37451	0.18967
Igf1r	ENSMUSG00000005533	-0.35413	0.18967
Recql4	ENSMUSG00000033762	-0.34206	0.1897
Miat	ENSMUSG00000097767	-0.37033	0.19006
Myh10	ENSMUSG00000020900	-0.29112	0.19006
Trp53bp1	ENSMUSG00000043909	-0.25771	0.19006
Depdc5	ENSMUSG00000037426	-0.18843	0.19006
Ankrd46	ENSMUSG00000048307	-0.16299	0.19006
Dlgap2	ENSMUSG00000047495	-0.36846	0.19009
5830418K08Rik	ENSMUSG00000046111	-0.35446	0.19009
Parg	ENSMUSG00000021911	-0.24421	0.19009
Gpt2	ENSMUSG00000031700	-0.21626	0.19009
Zfp354c	ENSMUSG00000044807	-0.27645	0.19022
Gcc2	ENSMUSG00000038039	-0.25995	0.19026
Acsl4	ENSMUSG00000031278	-0.26458	0.19029
Tyk2	ENSMUSG00000032175	-0.22437	0.1906
Pla1a	ENSMUSG00000002847	-0.37979	0.19095
Kcnj3	ENSMUSG00000026824	-0.15434	0.1914
C2cd3	ENSMUSG00000047248	-0.30257	0.19212
Stk38	ENSMUSG00000024006	-0.20833	0.19212
Sec24d	ENSMUSG00000039234	-0.33983	0.19251
Zfyve26	ENSMUSG00000066440	-0.32388	0.19251
Slco1a4	ENSMUSG00000030237	-0.28585	0.19251
Heatr6	ENSMUSG00000000976	-0.26289	0.19251
Polg	ENSMUSG00000039176	-0.25178	0.19251
Neto2	ENSMUSG00000036902	-0.24385	0.19251
Upf2	ENSMUSG00000043241	-0.19679	0.19251
Arsi	ENSMUSG00000036412	-0.32912	0.19327
2900026A02Rik	ENSMUSG00000051339	-0.22435	0.19405
Zmym6	ENSMUSG00000042408	-0.36935	0.19406
Arhgef6	ENSMUSG00000031133	-0.26417	0.1941
Mical3	ENSMUSG00000051586	-0.21516	0.1941
Vopp1	ENSMUSG00000037788	-0.18038	0.19456
Rnmt	ENSMUSG00000009535	-0.16157	0.19456
Katnal1	ENSMUSG00000041298	-0.25611	0.19515
Acacb	ENSMUSG00000042010	-0.3291	0.19525
Fam120b	ENSMUSG00000014763	-0.25862	0.19537
Lrrk2	ENSMUSG00000036273	-0.34882	0.1955
Gatc	ENSMUSG00000029536	-0.14559	0.1955
Unc5c	ENSMUSG00000059921	-0.31233	0.19585
Oca2	ENSMUSG00000030450	-0.3742	0.19605
Zdhhc23	ENSMUSG00000036304	-0.39849	0.19615
Pcyt1b	ENSMUSG00000035246	-0.15531	0.19615
Grid1	ENSMUSG00000041078	-0.14879	0.19625
Dgkg	ENSMUSG00000022861	-0.39567	0.19664
Rapgef5	ENSMUSG00000041992	-0.38565	0.19664
Trip12	ENSMUSG00000026219	-0.27769	0.19664
Rbm27	ENSMUSG00000024491	-0.27545	0.19714
Mical2	ENSMUSG00000038244	-0.22376	0.19714
Prodh	ENSMUSG00000003526	-0.31611	0.19726
Usp19	ENSMUSG00000006676	-0.15917	0.19735
Gm17484	ENSMUSG00000091514	-0.39946	0.1976
Gm11728	ENSMUSG00000086902	-0.39046	0.1976
Vcan	ENSMUSG00000021614	-0.34325	0.1976
Son	ENSMUSG00000022961	-0.29153	0.1976
Zfr	ENSMUSG00000022201	-0.2724	0.1976
Rnf214	ENSMUSG00000042790	-0.24326	0.1976
Jrk	ENSMUSG00000046380	-0.21936	0.1976
Foxm1	ENSMUSG00000001517	-0.33885	0.1983
Arel1	ENSMUSG00000042350	-0.33861	0.19845
Rgs8	ENSMUSG00000042671	-0.17417	0.19845
Gdpd1	ENSMUSG00000061666	-0.14306	0.19845
Moxd1	ENSMUSG00000020000	-0.27977	0.19868
Zfp942	ENSMUSG00000071267	-0.27547	0.19868
Zeb2	ENSMUSG00000026872	-0.31984	0.19896
Wdr5b	ENSMUSG00000034379	-0.29738	0.19896
Lrrc28	ENSMUSG00000030556	-0.18648	0.19896
Ccdc25	ENSMUSG00000022035	-0.13449	0.1993
Bcat1	ENSMUSG00000030268	-0.18827	0.19987
Mbtps1	ENSMUSG00000031835	-0.15	0.2
Dusp18	ENSMUSG00000047205	-0.21931	0.20021
Ubr2	ENSMUSG00000023977	-0.26081	0.20025
Mmachc	ENSMUSG00000028690	-0.20337	0.20069
4732463B04Rik	ENSMUSG00000097762	-0.38847	0.2017
Atxn7l1	ENSMUSG00000020564	-0.21049	0.2019
Abhd13	ENSMUSG00000040396	-0.23295	0.20208
Pnn	ENSMUSG00000020994	-0.23474	0.20244
Pls3	ENSMUSG00000016382	-0.2324	0.20244
Txlna	ENSMUSG00000053841	-0.17992	0.20245
Klhl12	ENSMUSG00000026455	-0.17951	0.20245
Ostm1	ENSMUSG00000038280	-0.17986	0.20289
Mmd	ENSMUSG00000003948	-0.1655	0.20289
St8sia3os	ENSMUSG00000086128	-0.35597	0.20312
Trio	ENSMUSG00000022263	-0.2709	0.20336
Lrrn1	ENSMUSG00000034648	-0.2698	0.20336
Qtrtd1	ENSMUSG00000022704	-0.22844	0.20336
B4galt6	ENSMUSG00000056124	-0.21944	0.20336
Tra2a	ENSMUSG00000029817	-0.17799	0.20336
Sh3gl2	ENSMUSG00000028488	-0.14801	0.20336
Usp33	ENSMUSG00000025437	-0.29143	0.20448
Ascc3	ENSMUSG00000038774	-0.3414	0.20455
Ganab	ENSMUSG00000071650	-0.17145	0.20455
Trank1	ENSMUSG00000062296	-0.33908	0.20457
Chst9	ENSMUSG00000047161	-0.36605	0.2046
Drd1a	ENSMUSG00000021478	-0.33353	0.20504
Pard3	ENSMUSG00000025812	-0.26891	0.20595
Kidins220	ENSMUSG00000036333	-0.25942	0.20626
4833439L19Rik	ENSMUSG00000025871	-0.12587	0.20626
Snx19	ENSMUSG00000031993	-0.17154	0.20661
Gns	ENSMUSG00000034707	-0.12409	0.20661
Podn	ENSMUSG00000028600	-0.37301	0.20748
Apol8	ENSMUSG00000056656	-0.22461	0.20827
Zfp9	ENSMUSG00000072623	-0.25622	0.20833
Smpd3	ENSMUSG00000031906	-0.23729	0.20833
Camsap1	ENSMUSG00000026933	-0.20212	0.20833
Kdm5c	ENSMUSG00000025332	-0.19074	0.20833
Qrich1	ENSMUSG00000006673	-0.17453	0.20833
Mark3	ENSMUSG00000007411	-0.13301	0.20833
Slc2a13	ENSMUSG00000036298	-0.29635	0.20885
Ggps1	ENSMUSG00000021302	-0.2657	0.20885
Tpr	ENSMUSG00000006005	-0.21685	0.20885
AU019823	ENSMUSG00000059820	-0.26104	0.209
Rassf5	ENSMUSG00000026430	-0.20687	0.20906
BC021891	ENSMUSG00000031853	-0.30858	0.20956
Plxna1	ENSMUSG00000030084	-0.28436	0.20956
Rcan2	ENSMUSG00000039601	-0.23903	0.20959
Fam84b	ENSMUSG00000072568	-0.3385	0.20966
Tmem169	ENSMUSG00000026188	-0.31291	0.20966
Myo1h	ENSMUSG00000066952	-0.3426	0.20997
Rb1cc1	ENSMUSG00000025907	-0.31128	0.21003
Cdh8	ENSMUSG00000036510	-0.30712	0.21008
Pds5b	ENSMUSG00000034021	-0.28804	0.21013
Pvrl3	ENSMUSG00000022656	-0.26025	0.2102
Synrg	ENSMUSG00000034940	-0.26163	0.2103
Itsn2	ENSMUSG00000020640	-0.3696	0.21046
Kcnh7	ENSMUSG00000059742	-0.31204	0.21046
Rap1gds1	ENSMUSG00000028149	-0.13924	0.21046
Dpysl5	ENSMUSG00000029168	-0.23441	0.21058
Serpinb6b	ENSMUSG00000042842	-0.36308	0.21086
Nos1ap	ENSMUSG00000038473	-0.34772	0.21101
Cog5	ENSMUSG00000035933	-0.33505	0.21101
Kpna4	ENSMUSG00000027782	-0.26577	0.21101
Etl4	ENSMUSG00000036617	-0.24415	0.21108
Arhgap12	ENSMUSG00000041225	-0.25054	0.21147
Gpr89	ENSMUSG00000028096	-0.19894	0.21147
Ccng1	ENSMUSG00000020326	-0.23561	0.21196
Ttc3	ENSMUSG00000040785	-0.23791	0.21198
Ldb3	ENSMUSG00000021798	-0.25692	0.21225
Fgf2	ENSMUSG00000037225	-0.36225	0.21239
Tnpo1	ENSMUSG00000009470	-0.32925	0.21252
Zfp760	ENSMUSG00000067928	-0.29708	0.21367
Proser1	ENSMUSG00000049504	-0.25196	0.2137
Asap2	ENSMUSG00000052632	-0.2774	0.21432
Gm26792	ENSMUSG00000096996	-0.37554	0.21451
Pxk	ENSMUSG00000033885	-0.16384	0.21479
Dtx3l	ENSMUSG00000049502	-0.26836	0.21485
Gm21743	ENSMUSG00000096740	-0.26658	0.21505
Asb11	ENSMUSG00000031382	-0.36059	0.21535
Ppargc1a	ENSMUSG00000029167	-0.26796	0.21559
Arhgef37	ENSMUSG00000045094	-0.385	0.21626
Zfp40	ENSMUSG00000002617	-0.25965	0.21626
Map1a	ENSMUSG00000027254	-0.20093	0.21626
Phf8	ENSMUSG00000041229	-0.25984	0.21632
Zgpat	ENSMUSG00000027582	-0.22514	0.21665
Zfp324	ENSMUSG00000004500	-0.23761	0.21706
Atp2a2	ENSMUSG00000029467	-0.26901	0.21725
Acad11	ENSMUSG00000090150	-0.18702	0.21726
Nhsl1	ENSMUSG00000039835	-0.20945	0.21774
Mms22l	ENSMUSG00000045751	-0.37805	0.21791
Ankrd17	ENSMUSG00000055204	-0.28661	0.21809
Gabrb3	ENSMUSG00000033676	-0.25287	0.21809
Dcp2	ENSMUSG00000024472	-0.23178	0.21809
Golgb1	ENSMUSG00000034243	-0.21542	0.21809
Inpp4a	ENSMUSG00000026113	-0.20993	0.21809
Kctd6	ENSMUSG00000021752	-0.19329	0.21809
Smim13	ENSMUSG00000091264	-0.18953	0.21809
Numb	ENSMUSG00000021224	-0.17618	0.21809
Larp1	ENSMUSG00000037331	-0.17187	0.21809
Pex13	ENSMUSG00000020283	-0.15558	0.21809
Nrd1	ENSMUSG00000053510	-0.12197	0.21809
Umodl1	ENSMUSG00000054134	-0.33247	0.21817
Shank2	ENSMUSG00000037541	-0.32735	0.21817
Raph1	ENSMUSG00000026014	-0.26534	0.21817
Senp8	ENSMUSG00000051705	-0.25169	0.21817
Arhgap35	ENSMUSG00000058230	-0.17809	0.21817
Rgs7bp	ENSMUSG00000021719	-0.36865	0.21845
Jag1	ENSMUSG00000027276	-0.31063	0.21845
Man1a2	ENSMUSG00000008763	-0.28513	0.21845
Ipo5	ENSMUSG00000030662	-0.13316	0.21888
Chrd	ENSMUSG00000006958	-0.28054	0.2191
Lipo1	ENSMUSG00000024766	-0.29561	0.2192
Calb1	ENSMUSG00000028222	-0.21017	0.2192
Grem1	ENSMUSG00000074934	-0.30905	0.21927
Med12l	ENSMUSG00000056476	-0.38353	0.21983
Heatr5b	ENSMUSG00000039414	-0.29685	0.21984
Dgki	ENSMUSG00000038665	-0.30749	0.21994
Adal	ENSMUSG00000027259	-0.21361	0.21994
Ttbk2	ENSMUSG00000090100	-0.24859	0.22019
Suv420h1	ENSMUSG00000045098	-0.256	0.22029
Fam115a	ENSMUSG00000036667	-0.23937	0.22029
Fbxo38	ENSMUSG00000042211	-0.2261	0.22029
4933426M11Rik	ENSMUSG00000021133	-0.29191	0.22047
Dmtf1	ENSMUSG00000042508	-0.27924	0.22047
Card9	ENSMUSG00000026928	-0.30682	0.2205
Sec24b	ENSMUSG00000001052	-0.14233	0.2205
Notch1	ENSMUSG00000026923	-0.34936	0.22072
Atp2b2	ENSMUSG00000030302	-0.19708	0.2208
4931415C17Rik	ENSMUSG00000054910	-0.35549	0.22149
Kalrn	ENSMUSG00000061751	-0.2674	0.22149
Camta1	ENSMUSG00000014592	-0.25886	0.22149
Cyp26b1	ENSMUSG00000063415	-0.30105	0.22155
Mkln1	ENSMUSG00000025609	-0.27106	0.22155
Ubxn4	ENSMUSG00000026353	-0.17152	0.22155
Mast2	ENSMUSG00000003810	-0.23533	0.222
Zfp113	ENSMUSG00000037007	-0.22617	0.22208
Ksr2	ENSMUSG00000061578	-0.29286	0.22214
Atxn3	ENSMUSG00000021189	-0.28623	0.22214
Usp8	ENSMUSG00000027363	-0.26674	0.22214
Ahnak	ENSMUSG00000069833	-0.2638	0.22214
Trim44	ENSMUSG00000027189	-0.23879	0.22214
Fam189a1	ENSMUSG00000030518	-0.19556	0.22214
Pabpc4	ENSMUSG00000011257	-0.16565	0.22214
Eri1	ENSMUSG00000031527	-0.21735	0.22236
Tmc3	ENSMUSG00000038540	-0.21056	0.22236
Il1r1	ENSMUSG00000026072	-0.27878	0.22256
Tsga10	ENSMUSG00000060771	-0.26218	0.22256
Zfp839	ENSMUSG00000021271	-0.17965	0.22256
Srxn1	ENSMUSG00000032802	-0.17004	0.22256
Pomk	ENSMUSG00000037251	-0.14186	0.22256
Gdap2	ENSMUSG00000027865	-0.18297	0.22262
Cog2	ENSMUSG00000031979	-0.16486	0.22306
Man1a	ENSMUSG00000003746	-0.30172	0.22314
Ranbp10	ENSMUSG00000037415	-0.21496	0.22314
Zfp940	ENSMUSG00000050855	-0.19249	0.22314
Kif11	ENSMUSG00000012443	-0.36098	0.22323
Mdn1	ENSMUSG00000058006	-0.36055	0.22323
Uso1	ENSMUSG00000029407	-0.24593	0.22323
Alg11	ENSMUSG00000063362	-0.19313	0.22325
Frem1	ENSMUSG00000059049	-0.38096	0.22395
Gm6483	ENSMUSG00000087153	-0.35056	0.22421
C2cd5	ENSMUSG00000030279	-0.22009	0.22425
Usp31	ENSMUSG00000063317	-0.25708	0.22434
Ndufaf4	ENSMUSG00000028261	-0.19768	0.22508
Slc38a11	ENSMUSG00000061171	-0.34268	0.22537
Smc6	ENSMUSG00000020608	-0.26182	0.22537
Rad52	ENSMUSG00000030166	-0.21314	0.22537
6330403A02Rik	ENSMUSG00000053963	-0.2824	0.22599
Poc5	ENSMUSG00000021671	-0.29806	0.22615
A930024N18Rik	ENSMUSG00000097566	-0.30001	0.22618
Cflar	ENSMUSG00000026031	-0.27077	0.22629
Mapk9	ENSMUSG00000020366	-0.1624	0.22654
Gm17296	ENSMUSG00000090290	-0.32757	0.22662
Zfp318	ENSMUSG00000015597	-0.32262	0.22662
Has3	ENSMUSG00000031910	-0.3101	0.22662
Lhfp	ENSMUSG00000048332	-0.29205	0.22662
Pcnt	ENSMUSG00000001151	-0.2741	0.22662
Nos1	ENSMUSG00000029361	-0.24578	0.22662
Fsd1l	ENSMUSG00000054752	-0.23301	0.22662
Arcn1	ENSMUSG00000032096	-0.2191	0.22662
Nde1	ENSMUSG00000022678	-0.18268	0.22662
Zfp346	ENSMUSG00000021481	-0.14329	0.22662
Opcml	ENSMUSG00000062257	-0.19028	0.22665
Ppp2r5c	ENSMUSG00000017843	-0.15293	0.22665
Lats2	ENSMUSG00000021959	-0.29158	0.22795
Napg	ENSMUSG00000024581	-0.19007	0.2282
Cep162	ENSMUSG00000056919	-0.3294	0.22839
Purb	ENSMUSG00000094483	-0.19053	0.22839
Lrrc8d	ENSMUSG00000046079	-0.18382	0.22839
Csde1	ENSMUSG00000068823	-0.1041	0.22865
Acp2	ENSMUSG00000002103	-0.18092	0.22925
B4galnt3	ENSMUSG00000041372	-0.37609	0.22945
Polr3g	ENSMUSG00000035834	-0.29755	0.22945
Lztfl1	ENSMUSG00000025245	-0.26912	0.22945
Unc79	ENSMUSG00000021198	-0.26892	0.22945
Fam26e	ENSMUSG00000049872	-0.23745	0.22945
Ptcd3	ENSMUSG00000063884	-0.20415	0.22945
Sec23ip	ENSMUSG00000055319	-0.18933	0.22945
Ppil4	ENSMUSG00000015757	-0.1811	0.22945
Serbp1	ENSMUSG00000036371	-0.099682	0.22945
Akap5	ENSMUSG00000021057	-0.25884	0.22977
9330132A10Rik	ENSMUSG00000043498	-0.23378	0.22977
Amer1	ENSMUSG00000050332	-0.33977	0.22994
Vps33a	ENSMUSG00000029434	-0.24513	0.22994
Cd180	ENSMUSG00000021624	-0.36048	0.23022
Meaf6	ENSMUSG00000028863	-0.12574	0.23022
Hcn1	ENSMUSG00000021730	-0.34899	0.23034
Akap9	ENSMUSG00000040407	-0.30383	0.2304
Cltc	ENSMUSG00000047126	-0.26156	0.2304
2003-09-01	ENSMUSG00000022456	-0.15623	0.23043
Gm608	ENSMUSG00000068284	-0.28462	0.23065
Myo9b	ENSMUSG00000004677	-0.18576	0.23069
Fig4	ENSMUSG00000038417	-0.17479	0.2307
Usp13	ENSMUSG00000056900	-0.19942	0.23098
Dhx40	ENSMUSG00000018425	-0.19013	0.23102
Klf13	ENSMUSG00000052040	-0.17411	0.23102
Uty	ENSMUSG00000068457	-0.3093	0.23104
Oprl1	ENSMUSG00000027584	-0.13685	0.23142
Jmjd1c	ENSMUSG00000037876	-0.31203	0.23185
Zfp41	ENSMUSG00000047003	-0.20884	0.23185
Gpatch8	ENSMUSG00000034621	-0.27905	0.23209
Sema5a	ENSMUSG00000022231	-0.26503	0.2321
Iars	ENSMUSG00000037851	-0.18783	0.2322
Mbtps2	ENSMUSG00000046873	-0.25876	0.23246
Atp2b1	ENSMUSG00000019943	-0.27041	0.23256
Ctcf	ENSMUSG00000005698	-0.24537	0.23256
Morc2a	ENSMUSG00000034543	-0.24479	0.23264
Eprs	ENSMUSG00000026615	-0.16895	0.23334
Lphn2	ENSMUSG00000028184	-0.25172	0.23349
Alg6	ENSMUSG00000073792	-0.27895	0.23385
Gnptab	ENSMUSG00000035311	-0.27503	0.23385
Gmfb	ENSMUSG00000062014	-0.26271	0.23385
Gli2	ENSMUSG00000048402	-0.24255	0.23385
Nrcam	ENSMUSG00000020598	-0.23578	0.23385
Braf	ENSMUSG00000002413	-0.22941	0.23385
Sestd1	ENSMUSG00000042272	-0.22614	0.23385
0610010F05Rik	ENSMUSG00000042208	-0.22491	0.23385
Dync1h1	ENSMUSG00000018707	-0.20159	0.23385
Arhgef17	ENSMUSG00000032875	-0.2099	0.23398
Ino80d	ENSMUSG00000040865	-0.19422	0.23398
Gm26587	ENSMUSG00000097470	-0.3447	0.23441
Dusp19	ENSMUSG00000027001	-0.32642	0.23443
Mtpap	ENSMUSG00000024234	-0.16092	0.23443
A830018L16Rik	ENSMUSG00000057715	-0.26246	0.23454
Erich5	ENSMUSG00000044726	-0.35663	0.23469
Itga4	ENSMUSG00000027009	-0.33993	0.23469
Tdg	ENSMUSG00000034674	-0.26419	0.23469
Zfp109	ENSMUSG00000074283	-0.37296	0.23484
Cacna1d	ENSMUSG00000015968	-0.33077	0.23572
Gphn	ENSMUSG00000047454	-0.20185	0.23574
Stxbp4	ENSMUSG00000020546	-0.3129	0.23682
Caprin1	ENSMUSG00000027184	-0.25125	0.23682
Cpsf7	ENSMUSG00000034820	-0.16666	0.23682
Gdi2	ENSMUSG00000021218	-0.11645	0.23682
B3gnt3	ENSMUSG00000031803	-0.31531	0.23775
Ubn1	ENSMUSG00000039473	-0.26391	0.23806
Gpr155	ENSMUSG00000041762	-0.24747	0.23806
Dnajc1	ENSMUSG00000026740	-0.24342	0.23821
Aasdh	ENSMUSG00000055923	-0.26773	0.23874
Rictor	ENSMUSG00000050310	-0.26023	0.23878
Bbx	ENSMUSG00000022641	-0.31417	0.23912
Mthfr	ENSMUSG00000029009	-0.21619	0.23912
Fam210a	ENSMUSG00000038121	-0.20321	0.23912
Csmd2	ENSMUSG00000028804	-0.30555	0.24023
Phf21a	ENSMUSG00000058318	-0.13298	0.24023
Piwil2	ENSMUSG00000033644	-0.36856	0.24042
Cacna1c	ENSMUSG00000051331	-0.29259	0.2405
Slc25a13	ENSMUSG00000015112	-0.34425	0.24081
Zfp759	ENSMUSG00000057396	-0.31648	0.24086
Ppip5k1	ENSMUSG00000033526	-0.23263	0.24086
AI464131	ENSMUSG00000046312	-0.18639	0.24091
Gm10644	ENSMUSG00000074219	-0.35432	0.24121
Megf9	ENSMUSG00000039270	-0.31995	0.24217
Abca2	ENSMUSG00000026944	-0.16464	0.24219
Arhgef2	ENSMUSG00000028059	-0.13481	0.24222
Chd2	ENSMUSG00000078671	-0.24371	0.24224
Mybph	ENSMUSG00000042451	-0.36653	0.24233
Kdm5b	ENSMUSG00000042207	-0.16517	0.24233
Adam1a	ENSMUSG00000072647	-0.33516	0.24267
St6gal2	ENSMUSG00000024172	-0.31625	0.24267
Col4a3	ENSMUSG00000079465	-0.31201	0.24267
Tcerg1	ENSMUSG00000024498	-0.25581	0.24267
Mtrr	ENSMUSG00000034617	-0.23408	0.24267
Actr2	ENSMUSG00000020152	-0.16728	0.24267
Hif1an	ENSMUSG00000036450	-0.1724	0.24343
Fam193a	ENSMUSG00000037210	-0.15383	0.24343
Zkscan8	ENSMUSG00000063894	-0.313	0.24362
Ssh2	ENSMUSG00000037926	-0.27527	0.24362
Hook3	ENSMUSG00000037234	-0.27719	0.24368
Syt13	ENSMUSG00000027220	-0.12383	0.24368
5330416C01Rik	ENSMUSG00000054944	-0.36819	0.24389
Klhl24	ENSMUSG00000062901	-0.31781	0.24389
9430020K01Rik	ENSMUSG00000033960	-0.28483	0.24389
Gpbp1l1	ENSMUSG00000034042	-0.228	0.24389
Fktn	ENSMUSG00000028414	-0.29976	0.24427
Vps4b	ENSMUSG00000009907	-0.20774	0.24427
Mark1	ENSMUSG00000026620	-0.13569	0.24427
Tmem135	ENSMUSG00000039428	-0.12328	0.24427
Setmar	ENSMUSG00000034639	-0.23651	0.24445
Gm16267	ENSMUSG00000084979	-0.36127	0.24447
Ddhd2	ENSMUSG00000061313	-0.17022	0.24447
Eif2s1	ENSMUSG00000021116	-0.17695	0.24475
Snap91	ENSMUSG00000033419	-0.22383	0.24479
Csnk1g1	ENSMUSG00000032384	-0.20913	0.2449
2810006K23Rik	ENSMUSG00000047635	-0.19112	0.24504
Eif2ak4	ENSMUSG00000005102	-0.24908	0.24605
Arhgap39	ENSMUSG00000033697	-0.22725	0.24619
Mgat4a	ENSMUSG00000026110	-0.14676	0.24632
Gna14	ENSMUSG00000024697	-0.35445	0.24636
Serpina3c	ENSMUSG00000066361	-0.36548	0.24652
Sdcbp2	ENSMUSG00000027456	-0.27483	0.24652
Ccser2	ENSMUSG00000058690	-0.27231	0.24652
Map7d2	ENSMUSG00000041020	-0.23205	0.24652
Serinc3	ENSMUSG00000017707	-0.16381	0.24652
Ndrg3	ENSMUSG00000027634	-0.1375	0.24652
Fam35a	ENSMUSG00000041471	-0.32533	0.24736
Jmjd4	ENSMUSG00000036819	-0.28628	0.24736
Nasp	ENSMUSG00000028693	-0.20404	0.24767
Cdc42bpa	ENSMUSG00000026490	-0.25516	0.24771
AI314180	ENSMUSG00000050812	-0.25546	0.24837
Dnajc3	ENSMUSG00000022136	-0.25379	0.24837
Amph	ENSMUSG00000021314	-0.15529	0.24837
Slitrk2	ENSMUSG00000036790	-0.23056	0.24875
Yam1	ENSMUSG00000098178	-0.30107	0.24903
Med13l	ENSMUSG00000018076	-0.30507	0.24928
Capza2	ENSMUSG00000015733	-0.17699	0.24946
Tgfb2	ENSMUSG00000039239	-0.20633	0.24953
Eml5	ENSMUSG00000051166	-0.31522	0.24976
Bod1l	ENSMUSG00000061755	-0.33861	0.25006
Igsf11	ENSMUSG00000022790	-0.22738	0.25006
Anks1b	ENSMUSG00000058589	-0.22521	0.25006
Ipo9	ENSMUSG00000041879	-0.15523	0.25006
Cox15	ENSMUSG00000040018	-0.13376	0.25058
1190002N15Rik	ENSMUSG00000045414	-0.24869	0.25076
Med13	ENSMUSG00000034297	-0.27071	0.25151
Smarcad1	ENSMUSG00000029920	-0.25594	0.25151
Rab6a	ENSMUSG00000030704	-0.16076	0.25151
Lsamp	ENSMUSG00000061080	-0.15307	0.25151
Htr4	ENSMUSG00000026322	-0.30898	0.25174
Ankhd1	ENSMUSG00000024483	-0.25923	0.25174
A530054K11Rik	ENSMUSG00000021510	-0.30238	0.2526
Bicd1	ENSMUSG00000003452	-0.26517	0.2526
2610015P09Rik	ENSMUSG00000022701	-0.27192	0.25262
Dhx29	ENSMUSG00000042426	-0.17797	0.25262
Cldn1	ENSMUSG00000022512	-0.35425	0.25278
Gm15800	ENSMUSG00000042744	-0.20164	0.25278
Prdm10	ENSMUSG00000042496	-0.26765	0.2529
Entpd7	ENSMUSG00000025192	-0.31175	0.25337
Nol4	ENSMUSG00000041923	-0.28096	0.25395
Huwe1	ENSMUSG00000025261	-0.28696	0.25399
Dnah9	ENSMUSG00000056752	-0.2341	0.25399
Pcmtd2	ENSMUSG00000027589	-0.29513	0.25477
Cep120	ENSMUSG00000048799	-0.23368	0.25485
Rev3l	ENSMUSG00000019841	-0.31579	0.25489
Pcnx	ENSMUSG00000021140	-0.22789	0.25494
Gm20691	ENSMUSG00000093505	-0.34485	0.25519
Tnrc6b	ENSMUSG00000047888	-0.26324	0.25531
Tmem170	ENSMUSG00000031953	-0.35441	0.25575
D130043K22Rik	ENSMUSG00000006711	-0.32649	0.25586
Trim37	ENSMUSG00000018548	-0.23741	0.25586
R3hcc1l	ENSMUSG00000025184	-0.19345	0.25586
Pcdha10	ENSMUSG00000007440	-0.23867	0.25615
Tll2	ENSMUSG00000025013	-0.3577	0.25644
Mast4	ENSMUSG00000034751	-0.29376	0.25644
Myo9a	ENSMUSG00000039585	-0.27564	0.25644
Prkdc	ENSMUSG00000022672	-0.24675	0.25644
Ermp1	ENSMUSG00000046324	-0.21773	0.25644
Bsn	ENSMUSG00000032589	-0.19099	0.25644
Kif1a	ENSMUSG00000014602	-0.17423	0.25644
Palmd	ENSMUSG00000033377	-0.22008	0.25646
Cnih3	ENSMUSG00000026514	-0.18309	0.25646
Cul2	ENSMUSG00000024231	-0.17868	0.25646
Specc1l	ENSMUSG00000033444	-0.19753	0.25655
Myrip	ENSMUSG00000041794	-0.16664	0.25655
Chd4	ENSMUSG00000063870	-0.143	0.25655
Jph1	ENSMUSG00000042686	-0.31347	0.25677
Mitf	ENSMUSG00000035158	-0.28113	0.25707
Zfp108	ENSMUSG00000030486	-0.25247	0.25707
Ptk2	ENSMUSG00000022607	-0.15469	0.25707
Rfwd3	ENSMUSG00000033596	-0.19955	0.25732
Foxk2	ENSMUSG00000039275	-0.18888	0.25738
Alox5	ENSMUSG00000025701	-0.34528	0.25772
Ttl	ENSMUSG00000027394	-0.16444	0.25784
Snx1	ENSMUSG00000032382	-0.16282	0.25824
Senp2	ENSMUSG00000022855	-0.18969	0.25828
Pds5a	ENSMUSG00000029202	-0.35962	0.25852
Zfp174	ENSMUSG00000054939	-0.32057	0.25852
Ptprt	ENSMUSG00000053141	-0.26726	0.25852
Yeats2	ENSMUSG00000041215	-0.24845	0.25852
Hspa5	ENSMUSG00000026864	-0.23236	0.25852
Ncoa6	ENSMUSG00000038369	-0.25945	0.25859
Actr3	ENSMUSG00000026341	-0.18148	0.25859
Klhl7	ENSMUSG00000028986	-0.25225	0.25916
Cdkal1	ENSMUSG00000006191	-0.18464	0.25942
Cnot1	ENSMUSG00000036550	-0.20927	0.25999
Ifitm1	ENSMUSG00000025491	-0.31372	0.26003
Gnaq	ENSMUSG00000024639	-0.27004	0.26103
Ppapdc1b	ENSMUSG00000031570	-0.17264	0.26104
Eif2ak1	ENSMUSG00000029613	-0.13819	0.26107
Mlxipl	ENSMUSG00000005373	-0.32478	0.26119
Klhl20	ENSMUSG00000026705	-0.23451	0.26119
Eogt	ENSMUSG00000035245	-0.23305	0.26119
Fgfr1op2	ENSMUSG00000040242	-0.20137	0.26119
Zfyve9	ENSMUSG00000034557	-0.13013	0.26119
Nars	ENSMUSG00000024587	-0.098832	0.26119
Gm12258	ENSMUSG00000072915	-0.23947	0.2613
Tfdp1	ENSMUSG00000038482	-0.2423	0.26152
Scn3a	ENSMUSG00000057182	-0.32039	0.26162
Ndst3	ENSMUSG00000027977	-0.30159	0.26175
1700049G17Rik	ENSMUSG00000070709	-0.28862	0.26175
Grik3	ENSMUSG00000001985	-0.23637	0.26175
Maf	ENSMUSG00000055435	-0.23185	0.26175
Dclk3	ENSMUSG00000032500	-0.18755	0.2618
Mat2a	ENSMUSG00000053907	-0.21144	0.26198
Mettl16	ENSMUSG00000010554	-0.15948	0.26202
Drosha	ENSMUSG00000022191	-0.15393	0.26202
Srp72	ENSMUSG00000036323	-0.22561	0.26224
Sv2b	ENSMUSG00000053025	-0.24597	0.26226
Zfp646	ENSMUSG00000049739	-0.18451	0.26236
Lrrc7	ENSMUSG00000028176	-0.35335	0.26257
Klhl34	ENSMUSG00000047485	-0.34963	0.26257
Fam49a	ENSMUSG00000020589	-0.22826	0.26257
4933427D14Rik	ENSMUSG00000020807	-0.21456	0.26257
Rfc1	ENSMUSG00000029191	-0.1915	0.26257
Nav2	ENSMUSG00000052512	-0.2782	0.26343
Gltscr1l	ENSMUSG00000036568	-0.23153	0.26343
Rptor	ENSMUSG00000025583	-0.16572	0.26343
Kdm5d	ENSMUSG00000056673	-0.25543	0.26359
D3Bwg0562e	ENSMUSG00000044667	-0.2928	0.26374
Fam171b	ENSMUSG00000048388	-0.27482	0.26374
Gldn	ENSMUSG00000046167	-0.34235	0.26389
Runx1t1	ENSMUSG00000006586	-0.28318	0.26389
Mpdz	ENSMUSG00000028402	-0.31129	0.2641
Oscar	ENSMUSG00000054594	-0.35521	0.26445
Clcn4-2	ENSMUSG00000000605	-0.12667	0.26445
Slc35b4	ENSMUSG00000018999	-0.13787	0.26469
Cul5	ENSMUSG00000032030	-0.16646	0.26476
Lclat1	ENSMUSG00000054469	-0.21861	0.26535
Rab3d	ENSMUSG00000019066	-0.20974	0.26535
Ints2	ENSMUSG00000018068	-0.34952	0.26557
Madd	ENSMUSG00000040687	-0.1653	0.26565
Tbc1d8b	ENSMUSG00000042473	-0.35433	0.26596
Alk	ENSMUSG00000055471	-0.31775	0.26596
Arhgap44	ENSMUSG00000033389	-0.16031	0.26603
Fam126b	ENSMUSG00000038174	-0.33421	0.26613
Racgap1	ENSMUSG00000023015	-0.19614	0.26613
Gcn1l1	ENSMUSG00000041638	-0.18605	0.26613
Ppp1r9a	ENSMUSG00000032827	-0.2467	0.26619
Gins3	ENSMUSG00000031669	-0.27062	0.26624
Atrn	ENSMUSG00000027312	-0.21992	0.26639
Abca9	ENSMUSG00000041797	-0.33152	0.26648
Ahctf1	ENSMUSG00000026491	-0.30614	0.26651
Gpr26	ENSMUSG00000040125	-0.24335	0.26657
Map9	ENSMUSG00000033900	-0.22009	0.26657
Abi1	ENSMUSG00000058835	-0.21187	0.26657
2810004N23Rik	ENSMUSG00000031984	-0.19262	0.26657
Pitpna	ENSMUSG00000017781	-0.09835	0.26657
RP24-300D7.1	ENSMUSG00000101013	-0.25375	0.2673
D930019O06Rik	ENSMUSG00000097083	-0.2676	0.26738
Tomm70a	ENSMUSG00000022752	-0.21629	0.26738
Exoc8	ENSMUSG00000074030	-0.18775	0.26738
Ubash3a	ENSMUSG00000042345	-0.34901	0.26749
Cnot4	ENSMUSG00000038784	-0.17735	0.26749
Hnrnpll	ENSMUSG00000024095	-0.22075	0.2681
Gfm2	ENSMUSG00000021666	-0.1603	0.26831
Gm16185	ENSMUSG00000084911	-0.28297	0.26859
Carf	ENSMUSG00000026017	-0.28189	0.26859
Cntnap5c	ENSMUSG00000038048	-0.35047	0.2688
Wdr19	ENSMUSG00000037890	-0.27672	0.2688
Sgtb	ENSMUSG00000042743	-0.26082	0.2688
Efcab9	ENSMUSG00000044056	-0.35294	0.26943
Ttyh3	ENSMUSG00000036565	-0.16496	0.26991
Rmi1	ENSMUSG00000035367	-0.20376	0.27003
Lmln	ENSMUSG00000022802	-0.26763	0.27012
Exoc6	ENSMUSG00000053799	-0.26071	0.27012
Srrm1	ENSMUSG00000028809	-0.18568	0.27022
Nup93	ENSMUSG00000032939	-0.2146	0.27035
Gm21989	ENSMUSG00000090370	-0.35247	0.27048
Map7	ENSMUSG00000019996	-0.21548	0.2706
Col11a1	ENSMUSG00000027966	-0.33414	0.2708
Sipa1l1	ENSMUSG00000042700	-0.25908	0.27172
Glp2r	ENSMUSG00000049928	-0.34343	0.27186
Prpf4b	ENSMUSG00000021413	-0.27113	0.27203
D930048N14Rik	ENSMUSG00000052563	-0.26822	0.27203
Zbtb34	ENSMUSG00000068966	-0.24096	0.27203
Homez	ENSMUSG00000057156	-0.1585	0.27203
Slk	ENSMUSG00000025060	-0.22418	0.27204
Mbnl1	ENSMUSG00000027763	-0.20147	0.27274
Heyl	ENSMUSG00000032744	-0.28024	0.27304
Gm26507	ENSMUSG00000097618	-0.34913	0.27351
D3Ertd254e	ENSMUSG00000033883	-0.27566	0.27351
Tti1	ENSMUSG00000027650	-0.17808	0.27351
Pml	ENSMUSG00000036986	-0.17332	0.27351
Exoc3	ENSMUSG00000034152	-0.15296	0.27351
Sh3bp5	ENSMUSG00000021892	-0.15864	0.27371
Mink1	ENSMUSG00000020827	-0.19625	0.27381
Camk2b	ENSMUSG00000057897	-0.15869	0.27429
Nf1	ENSMUSG00000020716	-0.11905	0.27429
Snx16	ENSMUSG00000027534	-0.22992	0.27447
Cnksr2	ENSMUSG00000025658	-0.25473	0.27483
Tcf4	ENSMUSG00000053477	-0.2531	0.27483
Gfra2	ENSMUSG00000022103	-0.15109	0.27492
Mllt4	ENSMUSG00000068036	-0.28717	0.27518
Palm2	ENSMUSG00000090053	-0.29356	0.27626
Jak1	ENSMUSG00000028530	-0.22394	0.27626
Kctd3	ENSMUSG00000026608	-0.18847	0.27626
Fbxo11	ENSMUSG00000005371	-0.24498	0.27645
Gpalpp1	ENSMUSG00000022008	-0.25983	0.27672
Ccbl2	ENSMUSG00000040213	-0.25503	0.27672
Creb1	ENSMUSG00000025958	-0.23274	0.27672
Zfyve20	ENSMUSG00000014550	-0.22585	0.27672
Ubl3	ENSMUSG00000001687	-0.12724	0.27672
Tox4	ENSMUSG00000016831	-0.18485	0.27673
Eif3j1	ENSMUSG00000027236	-0.16289	0.27673
Pdcl	ENSMUSG00000009030	-0.19733	0.27714
Il1rapl2	ENSMUSG00000059203	-0.3398	0.27727
Dgke	ENSMUSG00000000276	-0.20247	0.27727
Chuk	ENSMUSG00000025199	-0.31143	0.27752
Kpnb1	ENSMUSG00000001440	-0.21838	0.27752
Celsr2	ENSMUSG00000068740	-0.24768	0.27804
Dffa	ENSMUSG00000028974	-0.13995	0.27804
Kdm2b	ENSMUSG00000029475	-0.24516	0.27806
Peg3	ENSMUSG00000002265	-0.25642	0.27826
Zfp398	ENSMUSG00000062519	-0.24992	0.27826
Phf3	ENSMUSG00000048874	-0.24325	0.27826
Stag2	ENSMUSG00000025862	-0.24149	0.27826
Pde8b	ENSMUSG00000021684	-0.17217	0.27826
Cyb5b	ENSMUSG00000031924	-0.1217	0.27826
Ckap2	ENSMUSG00000037725	-0.34786	0.27834
Ankrd52	ENSMUSG00000014498	-0.31876	0.27834
Tns3	ENSMUSG00000020422	-0.22381	0.27834
Rft1	ENSMUSG00000052395	-0.21735	0.27867
Hsd17b12	ENSMUSG00000027195	-0.10203	0.27867
Samd12	ENSMUSG00000058656	-0.34726	0.27882
Ttc39b	ENSMUSG00000038172	-0.27669	0.27922
Uhrf2	ENSMUSG00000024817	-0.22313	0.27922
Dlx1as	ENSMUSG00000084946	-0.3427	0.27931
Ano3	ENSMUSG00000074968	-0.26482	0.28017
Eif4g2	ENSMUSG00000005610	-0.23065	0.28042
Numa1	ENSMUSG00000066306	-0.18575	0.28061
Hlx	ENSMUSG00000039377	-0.34221	0.28065
Cttnbp2	ENSMUSG00000000416	-0.28741	0.28065
Azi2	ENSMUSG00000039285	-0.20099	0.28065
Aph1b	ENSMUSG00000032375	-0.19973	0.28065
Usp7	ENSMUSG00000022710	-0.19515	0.28065
5330417C22Rik	ENSMUSG00000040412	-0.14851	0.28065
Elac1	ENSMUSG00000036941	-0.13648	0.28065
Arhgap31	ENSMUSG00000022799	-0.22817	0.28091
Plag1	ENSMUSG00000003282	-0.34013	0.28111
Golga4	ENSMUSG00000038708	-0.28488	0.28111
Lmo3	ENSMUSG00000030226	-0.13955	0.28111
Ssr1	ENSMUSG00000021427	-0.11558	0.28111
Hectd1	ENSMUSG00000035247	-0.27396	0.28182
Gpcpd1	ENSMUSG00000027346	-0.23172	0.28182
Zfp617	ENSMUSG00000066880	-0.23203	0.28271
Gpd1	ENSMUSG00000023019	-0.2149	0.28271
2310035C23Rik	ENSMUSG00000026319	-0.24227	0.28333
Cenpe	ENSMUSG00000045328	-0.29596	0.28334
Ankfy1	ENSMUSG00000020790	-0.21929	0.28336
Iqsec3	ENSMUSG00000040797	-0.20388	0.28336
Nat10	ENSMUSG00000027185	-0.17449	0.28336
Adar	ENSMUSG00000027951	-0.16929	0.28336
Nphp1	ENSMUSG00000027378	-0.15203	0.28366
Cops2	ENSMUSG00000027206	-0.13646	0.28366
Rabif	ENSMUSG00000042229	-0.12093	0.28366
Ppid	ENSMUSG00000027804	-0.12099	0.28411
Fam222b	ENSMUSG00000037750	-0.18951	0.28511
Api5	ENSMUSG00000027193	-0.18246	0.28519
Steap2	ENSMUSG00000015653	-0.34163	0.28527
Elk1	ENSMUSG00000009406	-0.21887	0.28535
Wdr35	ENSMUSG00000066643	-0.24491	0.28546
Fkbp15	ENSMUSG00000066151	-0.17208	0.2859
Clrn1	ENSMUSG00000043850	-0.34223	0.286
Thap2	ENSMUSG00000020137	-0.32896	0.286
Dnase1	ENSMUSG00000005980	-0.30549	0.28641
Arhgef26	ENSMUSG00000036885	-0.23346	0.28694
9430037G07Rik	ENSMUSG00000097073	-0.33967	0.28743
Dusp11	ENSMUSG00000030002	-0.26744	0.28743
Pkd1	ENSMUSG00000032855	-0.25485	0.28743
Zc3h4	ENSMUSG00000059273	-0.21648	0.28743
Golga5	ENSMUSG00000021192	-0.15281	0.28829
Hivep3	ENSMUSG00000028634	-0.2525	0.28834
Smc4	ENSMUSG00000034349	-0.28894	0.28863
Bbs12	ENSMUSG00000051444	-0.27035	0.28878
F8	ENSMUSG00000031196	-0.32441	0.28908
Nyx	ENSMUSG00000051228	-0.34245	0.28917
A930011O12Rik	ENSMUSG00000097545	-0.31574	0.28917
Plekha5	ENSMUSG00000030231	-0.21892	0.28917
Gmps	ENSMUSG00000027823	-0.14604	0.28917
Zfp292	ENSMUSG00000039967	-0.29533	0.2894
AA987161	ENSMUSG00000058093	-0.28103	0.2894
Inpp5b	ENSMUSG00000028894	-0.19679	0.28955
Arhgef18	ENSMUSG00000004568	-0.17067	0.28976
Hspa4l	ENSMUSG00000025757	-0.24819	0.28987
Gabrb1	ENSMUSG00000029212	-0.29721	0.29014
Chrna1	ENSMUSG00000027107	-0.27053	0.29014
Ccdc6	ENSMUSG00000048701	-0.16117	0.29014
Pcdh17	ENSMUSG00000035566	-0.32568	0.29017
Tnfaip8l3	ENSMUSG00000074345	-0.32208	0.29024
Disc1	ENSMUSG00000043051	-0.28039	0.29024
Aggf1	ENSMUSG00000021681	-0.18338	0.29024
Pafah1b1	ENSMUSG00000020745	-0.16471	0.29024
Rab11fip4	ENSMUSG00000017639	-0.15704	0.29024
Arhgef11	ENSMUSG00000041977	-0.27198	0.29033
Zfp644	ENSMUSG00000049606	-0.24919	0.29033
Ckap5	ENSMUSG00000040549	-0.14805	0.29033
Hist1h2bg	ENSMUSG00000058385	-0.33658	0.2908
Gm13687	ENSMUSG00000082494	-0.34105	0.29123
Tfdp2	ENSMUSG00000032411	-0.24494	0.29123
St8sia1	ENSMUSG00000030283	-0.25639	0.29135
Klhdc10	ENSMUSG00000029775	-0.11425	0.29139
Nhsl2	ENSMUSG00000079481	-0.24909	0.29155
Slc10a7	ENSMUSG00000031684	-0.28655	0.29183
Zfp943	ENSMUSG00000053347	-0.19515	0.29193
Zcchc24	ENSMUSG00000055538	-0.21878	0.29229
Map10	ENSMUSG00000050930	-0.28257	0.29289
Nol8	ENSMUSG00000021392	-0.26227	0.29289
Kcns2	ENSMUSG00000050963	-0.24132	0.29289
Plekha1	ENSMUSG00000040268	-0.18585	0.29289
Tal1	ENSMUSG00000028717	-0.30077	0.29359
Abcc8	ENSMUSG00000040136	-0.21868	0.29368
Mgat4c	ENSMUSG00000019888	-0.26306	0.29392
Abhd2	ENSMUSG00000039202	-0.21818	0.29392
Kndc1	ENSMUSG00000066129	-0.24467	0.29398
Fndc8	ENSMUSG00000018844	-0.33945	0.29404
Ddx19a	ENSMUSG00000015023	-0.13534	0.29404
Brap	ENSMUSG00000029458	-0.16021	0.29436
Ccnc	ENSMUSG00000028252	-0.19246	0.29453
Zfp629	ENSMUSG00000045639	-0.14125	0.29453
Fat3	ENSMUSG00000074505	-0.30392	0.29503
Lpin2	ENSMUSG00000024052	-0.20392	0.29503
Ptpn3	ENSMUSG00000038764	-0.22938	0.2954
Cmya5	ENSMUSG00000047419	-0.27642	0.29551
Celf5	ENSMUSG00000034818	-0.19917	0.29551
Slit3	ENSMUSG00000056427	-0.28251	0.29606
RP24-439I22.1	ENSMUSG00000100826	-0.27419	0.29606
Arhgef10	ENSMUSG00000071176	-0.20539	0.29606
Mfn1	ENSMUSG00000027668	-0.11624	0.29606
Otud3	ENSMUSG00000041161	-0.21977	0.29615
Sdad1	ENSMUSG00000029415	-0.22797	0.29622
9830144P21Rik	ENSMUSG00000087528	-0.33037	0.29661
Magi3	ENSMUSG00000052539	-0.29194	0.29661
Slc31a1	ENSMUSG00000066150	-0.28773	0.29661
Cblb	ENSMUSG00000022637	-0.26119	0.29661
Lin54	ENSMUSG00000035310	-0.21046	0.29661
Tmem33	ENSMUSG00000037720	-0.18805	0.29661
9430091E24Rik	ENSMUSG00000084808	-0.32935	0.29662
Zfp930	ENSMUSG00000059897	-0.32661	0.29662
Cyb561	ENSMUSG00000019590	-0.14444	0.29742
Cep250	ENSMUSG00000038241	-0.18422	0.29758
Agps	ENSMUSG00000042410	-0.22945	0.29768
Lyve1	ENSMUSG00000030787	-0.33281	0.29781
9430041J12Rik	ENSMUSG00000086155	-0.32335	0.29781
Dip2c	ENSMUSG00000048264	-0.26551	0.29781
Appbp2	ENSMUSG00000018481	-0.21959	0.29837
Fam155a	ENSMUSG00000079157	-0.18156	0.29837
Rnft2	ENSMUSG00000032850	-0.14759	0.29847
Ryr2	ENSMUSG00000021313	-0.29898	0.29873
Fam179b	ENSMUSG00000035614	-0.29053	0.29873
Itga8	ENSMUSG00000026768	-0.28098	0.29873
Ubr3	ENSMUSG00000044308	-0.26651	0.29873
Epm2aip1	ENSMUSG00000046785	-0.23791	0.29873
Arl5a	ENSMUSG00000036093	-0.23915	0.2989
Usp1	ENSMUSG00000028560	-0.25591	0.29909
Zc3hav1	ENSMUSG00000029826	-0.24584	0.29923
Fhad1	ENSMUSG00000051435	-0.22859	0.29923
Col20a1	ENSMUSG00000016356	-0.25989	0.2994
Ccar1	ENSMUSG00000020074	-0.26866	0.29945
Atp2b3	ENSMUSG00000031376	-0.33019	0.29958
Csmd1	ENSMUSG00000060924	-0.29868	0.29958
Frmpd4	ENSMUSG00000049176	-0.29069	0.29958
Gria3	ENSMUSG00000001986	-0.24653	0.29958
Pten	ENSMUSG00000013663	-0.25048	0.29996
Mbd4	ENSMUSG00000030322	-0.31	0.30068
Sptbn1	ENSMUSG00000020315	-0.2428	0.30068
Skiv2l2	ENSMUSG00000016018	-0.24315	0.30079
Psmd1	ENSMUSG00000026229	-0.22767	0.30079
Elfn1	ENSMUSG00000048988	-0.15798	0.30079
Spin1	ENSMUSG00000021395	-0.12828	0.30079
Caap1	ENSMUSG00000028578	-0.20578	0.30086
Ago2	ENSMUSG00000036698	-0.24359	0.30118
Sos1	ENSMUSG00000024241	-0.23593	0.30127
Smg1	ENSMUSG00000030655	-0.31014	0.30207
4932438A13Rik	ENSMUSG00000037270	-0.28812	0.30207
Ddx26b	ENSMUSG00000035967	-0.27386	0.30207
Avl9	ENSMUSG00000029787	-0.26826	0.30207
Ccdc30	ENSMUSG00000028637	-0.17199	0.30207
Pnmal1	ENSMUSG00000041141	-0.30832	0.30217
Stxbp5	ENSMUSG00000019790	-0.22767	0.30217
Cpsf2	ENSMUSG00000041781	-0.20374	0.30217
Pafah1b2	ENSMUSG00000003131	-0.10928	0.30218
Ranbp6	ENSMUSG00000074909	-0.20045	0.30259
Rhbdl3	ENSMUSG00000017692	-0.1791	0.30259
Pirt	ENSMUSG00000048070	-0.27461	0.30261
Cd38	ENSMUSG00000029084	-0.18987	0.30271
Ranbp2	ENSMUSG00000003226	-0.31312	0.3028
Pmepa1	ENSMUSG00000038400	-0.17241	0.30394
Zfp51	ENSMUSG00000023892	-0.27879	0.30409
Nod1	ENSMUSG00000038058	-0.18819	0.30413
Foxp1	ENSMUSG00000030067	-0.20773	0.30414
Slc16a14	ENSMUSG00000026220	-0.32445	0.3043
Tmem178b	ENSMUSG00000057716	-0.24939	0.30528
Gm15688	ENSMUSG00000089737	-0.27838	0.30537
Zfp507	ENSMUSG00000044452	-0.33199	0.30538
Gon4l	ENSMUSG00000054199	-0.27669	0.30569
Epc2	ENSMUSG00000069495	-0.2218	0.30569
Naa50	ENSMUSG00000022698	-0.19504	0.30569
Armc2	ENSMUSG00000071324	-0.20645	0.30601
Armc1	ENSMUSG00000027599	-0.16406	0.30678
Szt2	ENSMUSG00000033253	-0.16242	0.30678
Atf7ip	ENSMUSG00000030213	-0.19962	0.30688
Brwd3	ENSMUSG00000063663	-0.32673	0.30713
Slmap	ENSMUSG00000021870	-0.27642	0.30713
Pdpk1	ENSMUSG00000024122	-0.2762	0.30713
Mpp5	ENSMUSG00000021112	-0.25025	0.30713
Dhx36	ENSMUSG00000027770	-0.24617	0.30713
Mef2d	ENSMUSG00000001419	-0.21298	0.30713
Xpr1	ENSMUSG00000026469	-0.20659	0.30713
Golga3	ENSMUSG00000029502	-0.19055	0.30713
Hars2	ENSMUSG00000019143	-0.15047	0.30713
Ets2	ENSMUSG00000022895	-0.12193	0.30713
Ttc19	ENSMUSG00000042298	-0.11462	0.30713
Cacna1i	ENSMUSG00000022416	-0.18514	0.30728
Wipf2	ENSMUSG00000038013	-0.13693	0.30728
Ninl	ENSMUSG00000068115	-0.27495	0.30769
Fam120a	ENSMUSG00000038014	-0.23627	0.30791
Neu3	ENSMUSG00000035239	-0.30596	0.30794
Ank2	ENSMUSG00000032826	-0.22938	0.30794
Ints7	ENSMUSG00000037461	-0.18458	0.30794
Polr3b	ENSMUSG00000034453	-0.16618	0.30794
Malt1	ENSMUSG00000032688	-0.29043	0.30825
Gm6970	ENSMUSG00000091230	-0.33017	0.3085
Ralgapa2	ENSMUSG00000037110	-0.27623	0.30851
Dmxl2	ENSMUSG00000041268	-0.27385	0.30856
Gsk3b	ENSMUSG00000022812	-0.20641	0.30856
Nell2	ENSMUSG00000022454	-0.16578	0.30875
Grin1os	ENSMUSG00000085830	-0.32597	0.30895
Bend4	ENSMUSG00000092060	-0.26133	0.30895
Arap2	ENSMUSG00000037999	-0.24043	0.30895
Bicd2	ENSMUSG00000037933	-0.25729	0.30899
Ddi2	ENSMUSG00000078515	-0.23069	0.30899
Gdpgp1	ENSMUSG00000050973	-0.18829	0.30899
Naa15	ENSMUSG00000063273	-0.19785	0.3093
Cyfip1	ENSMUSG00000030447	-0.19643	0.3093
Map2k6	ENSMUSG00000020623	-0.18257	0.30987
Ccser1	ENSMUSG00000039578	-0.25641	0.31021
Tarsl2	ENSMUSG00000030515	-0.24524	0.31021
Actr3b	ENSMUSG00000056367	-0.1493	0.31035
Slc35e1	ENSMUSG00000019731	-0.20708	0.31053
Ccdc85a	ENSMUSG00000032878	-0.26339	0.31067
Ap3m1	ENSMUSG00000021824	-0.18933	0.31076
Fbxl5	ENSMUSG00000039753	-0.14807	0.31108
Usp47	ENSMUSG00000059263	-0.18499	0.31133
Col4a3bp	ENSMUSG00000021669	-0.2188	0.31142
A730017L22Rik	ENSMUSG00000085566	-0.25682	0.31163
Mgea5	ENSMUSG00000025220	-0.21501	0.31177
Usp51	ENSMUSG00000067215	-0.32924	0.31189
Nup205	ENSMUSG00000038759	-0.24751	0.31189
Taco1	ENSMUSG00000001983	-0.23829	0.31189
Kdm4c	ENSMUSG00000028397	-0.22028	0.31189
Dyrk1a	ENSMUSG00000022897	-0.20752	0.31189
Gfod1	ENSMUSG00000051335	-0.23132	0.31195
Anln	ENSMUSG00000036777	-0.26995	0.3121
Guf1	ENSMUSG00000029208	-0.24111	0.3121
Gabra5	ENSMUSG00000055078	-0.17678	0.31229
Mrs2	ENSMUSG00000021339	-0.30509	0.31244
Cep290	ENSMUSG00000019971	-0.32775	0.31266
Cdnf	ENSMUSG00000039496	-0.3227	0.31266
Mettl4	ENSMUSG00000055660	-0.31621	0.31266
D030028A08Rik	ENSMUSG00000078700	-0.30715	0.31266
Rapgef6	ENSMUSG00000037533	-0.28436	0.31266
Pitpnc1	ENSMUSG00000040430	-0.22563	0.31266
Pik3ca	ENSMUSG00000027665	-0.1846	0.31266
Ppapdc2	ENSMUSG00000040105	-0.13939	0.31266
B3galt2	ENSMUSG00000033849	-0.20124	0.3133
Glt1d1	ENSMUSG00000049971	-0.1882	0.3133
Zfp160	ENSMUSG00000067942	-0.25775	0.31341
Frmd7	ENSMUSG00000036131	-0.32706	0.31433
Prlr	ENSMUSG00000005268	-0.28277	0.31456
Ythdc1	ENSMUSG00000035851	-0.18651	0.31486
Mfsd4	ENSMUSG00000059149	-0.2728	0.31542
Uxs1	ENSMUSG00000057363	-0.16194	0.31577
Recql5	ENSMUSG00000020752	-0.19653	0.31589
Atm	ENSMUSG00000034218	-0.32689	0.31617
Fbxl12os	ENSMUSG00000062470	-0.29818	0.31617
Trak2	ENSMUSG00000026028	-0.26328	0.31617
Elmod2	ENSMUSG00000035151	-0.25853	0.31617
Ccdc129	ENSMUSG00000037973	-0.25728	0.31617
Rlf	ENSMUSG00000049878	-0.25642	0.31617
Dnajc6	ENSMUSG00000028528	-0.25611	0.31617
Ky	ENSMUSG00000035606	-0.24452	0.31617
Man2a2	ENSMUSG00000038886	-0.24328	0.31617
Stab1	ENSMUSG00000042286	-0.21418	0.31617
Trim24	ENSMUSG00000029833	-0.20366	0.31617
Ccdc177	ENSMUSG00000062961	-0.179	0.31617
Slc35e2	ENSMUSG00000042202	-0.1565	0.31617
Itsn1	ENSMUSG00000022957	-0.15552	0.31617
Gm5124	ENSMUSG00000051537	-0.29638	0.31635
Dpp6	ENSMUSG00000061576	-0.11853	0.31764
Shroom2	ENSMUSG00000045180	-0.1545	0.31775
Dnajc16	ENSMUSG00000040697	-0.22047	0.31781
Gnao1	ENSMUSG00000031748	-0.15336	0.31781
Naa25	ENSMUSG00000042719	-0.31018	0.31782
Katnbl1	ENSMUSG00000027132	-0.19978	0.31782
Kcne3	ENSMUSG00000035165	-0.32115	0.31806
Topbp1	ENSMUSG00000032555	-0.22726	0.31806
Rab8b	ENSMUSG00000036943	-0.17201	0.31806
Stau2	ENSMUSG00000025920	-0.13346	0.31856
Slc35a5	ENSMUSG00000022664	-0.15452	0.31905
Pank4	ENSMUSG00000029056	-0.13178	0.31905
Brwd1	ENSMUSG00000022914	-0.12442	0.31905
Wdr47	ENSMUSG00000040389	-0.19063	0.31929
Cand1	ENSMUSG00000020114	-0.1458	0.31929
Ppp2r2a	ENSMUSG00000022052	-0.098008	0.31929
Gsx1	ENSMUSG00000053129	-0.3195	0.31984
Tnr	ENSMUSG00000015829	-0.30984	0.31984
Tubgcp6	ENSMUSG00000051786	-0.28425	0.31984
Kbtbd8	ENSMUSG00000030031	-0.25121	0.31984
Nrxn1	ENSMUSG00000024109	-0.23631	0.31984
Elavl2	ENSMUSG00000008489	-0.23537	0.31984
Cep104	ENSMUSG00000039523	-0.18705	0.31984
Dhx57	ENSMUSG00000035051	-0.1273	0.31984
Cast	ENSMUSG00000021585	-0.31228	0.3206
Wdr12	ENSMUSG00000026019	-0.1393	0.3206
Smad4	ENSMUSG00000024515	-0.24135	0.32068
Zfp180	ENSMUSG00000057101	-0.1808	0.32082
Zscan22	ENSMUSG00000054715	-0.16848	0.32082
Syt1	ENSMUSG00000035864	-0.15733	0.32082
Gm6277	ENSMUSG00000097440	-0.3194	0.32101
Mcmbp	ENSMUSG00000048170	-0.16281	0.32102
Ift80	ENSMUSG00000027778	-0.27206	0.32146
Magi1	ENSMUSG00000045095	-0.24941	0.32146
Sec63	ENSMUSG00000019802	-0.17977	0.32146
Nbn	ENSMUSG00000028224	-0.16374	0.32146
Rph3a	ENSMUSG00000029608	-0.18115	0.32225
Trrap	ENSMUSG00000045482	-0.16571	0.32231
Ercc6l2	ENSMUSG00000021470	-0.26465	0.32258
Adat2	ENSMUSG00000019808	-0.26263	0.32258
Myef2	ENSMUSG00000027201	-0.24689	0.32302
Cadm2	ENSMUSG00000064115	-0.19568	0.32302
Syne2	ENSMUSG00000063450	-0.18819	0.32328
Nf2	ENSMUSG00000009073	-0.13586	0.32348
Gm26560	ENSMUSG00000097029	-0.31742	0.32398
Gm15470	ENSMUSG00000083500	-0.3094	0.32416
Htr1f	ENSMUSG00000050783	-0.31341	0.32426
Ophn1	ENSMUSG00000031214	-0.15795	0.32426
Dpy19l3	ENSMUSG00000043671	-0.16997	0.32446
Vps13a	ENSMUSG00000046230	-0.29646	0.32454
Snx13	ENSMUSG00000020590	-0.28412	0.32454
Mroh2a	ENSMUSG00000079429	-0.25758	0.32454
Cntnap4	ENSMUSG00000031772	-0.23384	0.32454
Zfp141	ENSMUSG00000092416	-0.21842	0.32454
Srpk2	ENSMUSG00000062604	-0.20391	0.32454
Thoc2	ENSMUSG00000037475	-0.28071	0.32474
5730455P16Rik	ENSMUSG00000057181	-0.25296	0.32474
Cenpc1	ENSMUSG00000029253	-0.25221	0.32474
Ccny	ENSMUSG00000024286	-0.2074	0.32474
Smyd4	ENSMUSG00000018809	-0.17842	0.32474
Poglut1	ENSMUSG00000034064	-0.11972	0.32474
Ogn	ENSMUSG00000021390	-0.3149	0.32486
Fcrl1	ENSMUSG00000059994	-0.30505	0.32486
Dmxl1	ENSMUSG00000037416	-0.29378	0.32486
Derl3	ENSMUSG00000009092	-0.28975	0.32486
Trappc11	ENSMUSG00000038102	-0.15351	0.32486
Lrrn3	ENSMUSG00000036295	-0.14555	0.32486
Ttc14	ENSMUSG00000027677	-0.24935	0.32495
Tsc1	ENSMUSG00000026812	-0.24592	0.32542
Tmem127	ENSMUSG00000034850	-0.13509	0.32542
Shprh	ENSMUSG00000090112	-0.2627	0.32551
Uvrag	ENSMUSG00000035354	-0.16	0.32551
Nubp1	ENSMUSG00000022503	-0.18678	0.3257
Aff4	ENSMUSG00000049470	-0.24237	0.32595
Setd5	ENSMUSG00000034269	-0.23704	0.32595
Nlk	ENSMUSG00000017376	-0.21967	0.32595
Scube2	ENSMUSG00000007279	-0.31635	0.32609
Antxr2	ENSMUSG00000029338	-0.26284	0.32609
Ints8	ENSMUSG00000040738	-0.26179	0.32609
Cebpz	ENSMUSG00000024081	-0.2337	0.32609
Kif5c	ENSMUSG00000026764	-0.22279	0.32609
Zfp322a	ENSMUSG00000046351	-0.22227	0.32609
Clip3	ENSMUSG00000013921	-0.15046	0.32609
Rbm25	ENSMUSG00000010608	-0.22122	0.32627
Kif3b	ENSMUSG00000027475	-0.20432	0.3263
Slc1a3	ENSMUSG00000005360	-0.17254	0.3265
4732487G21Rik	ENSMUSG00000097488	-0.23707	0.32808
Arid2	ENSMUSG00000033237	-0.26881	0.32877
Fv1	ENSMUSG00000070583	-0.2817	0.32903
2007-03-01	ENSMUSG00000026977	-0.26089	0.32929
Tcf20	ENSMUSG00000041852	-0.23565	0.32949
Gm13139	ENSMUSG00000067916	-0.3171	0.32968
Igfn1	ENSMUSG00000051985	-0.31676	0.32968
Chm	ENSMUSG00000025531	-0.27375	0.32968
Ylpm1	ENSMUSG00000021244	-0.24823	0.32968
Wdr72	ENSMUSG00000044976	-0.20075	0.32968
Cds2	ENSMUSG00000058793	-0.13764	0.32968
Eapp	ENSMUSG00000054302	-0.12517	0.32968
Idh2	ENSMUSG00000030541	-0.17644	0.32989
Npat	ENSMUSG00000033054	-0.24056	0.33021
Kctd4	ENSMUSG00000046523	-0.23596	0.33021
Zfp518b	ENSMUSG00000046572	-0.23298	0.33021
Pip4k2a	ENSMUSG00000026737	-0.18132	0.33021
Eif4g3	ENSMUSG00000028760	-0.21111	0.33069
Tnpo3	ENSMUSG00000012535	-0.27915	0.33071
Atrx	ENSMUSG00000031229	-0.24928	0.33071
Ddx19b	ENSMUSG00000033658	-0.21993	0.33071
Zfp952	ENSMUSG00000053390	-0.20192	0.33105
Cgn	ENSMUSG00000068876	-0.30225	0.33108
Zfp964	ENSMUSG00000091764	-0.29885	0.33108
Samd15	ENSMUSG00000090812	-0.28301	0.33108
Zkscan1	ENSMUSG00000029729	-0.11896	0.33108
Fzd8	ENSMUSG00000036904	-0.18264	0.33139
Gm9833	ENSMUSG00000049230	-0.31637	0.33149
Atp8a2	ENSMUSG00000021983	-0.28044	0.33204
Zfp335	ENSMUSG00000039834	-0.17395	0.33225
Ppp2r5e	ENSMUSG00000021051	-0.22637	0.33234
4930579G18Rik	ENSMUSG00000040840	-0.31743	0.33236
Mt2	ENSMUSG00000031762	-0.25745	0.33236
Rnf32	ENSMUSG00000029130	-0.18563	0.33249
Ralgps1	ENSMUSG00000038831	-0.17919	0.33249
Pcdhb4	ENSMUSG00000045689	-0.23242	0.33284
Ccdc88b	ENSMUSG00000047810	-0.26267	0.33298
Smg7	ENSMUSG00000042772	-0.11774	0.33299
Supv3l1	ENSMUSG00000020079	-0.14046	0.33322
Gm16576	ENSMUSG00000087543	-0.31592	0.33339
Brms1l	ENSMUSG00000012076	-0.1743	0.33339
[truncated: 9,809 more rows]
